# Supplementary material for: Sterility and Gene Expression in Hybrid Males of Xenopus laevis and X. muelleri
Source: PLoS One. 2007 Aug 22;2(8):e781. doi: 10.1371/journal.pone.0000781 (PMC1940320; doi:10.1371/journal.pone.0000781)
Supplement: Table S3 — Genes differentially expressed between Xenopus muelleri and X. laevis. Probe ID is the Affymetrix reference number for a particular probeset. Columns B–D are expression values after RMA normalization for Xenopus muelleri and columns E–H are X. laevis. MeanMuell is the mean expression value of X. muelleri and MeanLaev is the mean expression value for hybrids. M-L is the fold change in expression (MeanMuell - MeanLaev). t is the moderated t-statistic. P.Value is the unadjusted P value obtained from the empirical Bayes function. adj.P.Val is the FDR corrected P value according to Benjamini and Hochberg (1995). B is the B-statistic which is the log-odds that a gene is differentially expressed. Description is the annotation information for a probeset as given by Affymetrix. (3.78 MB XLS) [file pone.0000781.s003.xls]

## Sheet: Sheet1
ProbeID	log21444.CEL	log21454.CEL	log21484.CEL	log21449.CEL	log21452.CEL	log21466.CEL	log21467.CEL	MeanMuell	MeanLaev	M-L	t	P.Value	adj.P.Val	B	Descriptoin
Xl.23752.2.S1_at	4.89096	4.1723	4.1723	12.4631	12.1146	12.616	11.1905	4.41186	12.096	-7.68419	-20.5345	1.63117e-08	3.82326e-06	10.2793	gb:BJ051838 /DB_XREF=gi:17498306 /DB_XREF=BJ051838 /CLONE=XL036p07 /TID=Xl.23752.2 /CNT=71 /FEA=EST /TIER=Stack /STK=26 /UG=Xl.23752 /UG_TITLE=Xenopus laevis, Similar to ribosomal protein S3a, clone MGC:53968 IMAGE:5570910, mRNA, complete cds
Xl.3208.1.A1_at	2.95372	2.90391	2.90391	10.5903	10.7639	9.7478	10.3824	2.92051	10.3711	-7.45061	-27.6419	1.36563e-09	1.12778e-06	12.3329	gb:BJ057240 /DB_XREF=gi:17470013 /DB_XREF=BJ057240 /CLONE=XL034h04 /TID=Xl.3208.1 /CNT=18 /FEA=EST /TIER=Stack /STK=15 /UG=Xl.3208 /UG_TITLE=ESTs, Weakly similar to hypothetical protein FLJ12671 (Homo sapiens) (H.sapiens)
Xl.2458.1.A1_at	2.95372	2.56059	2.56059	10.1294	9.43387	10.7911	10.093	2.69163	10.1118	-7.42021	-23.1827	5.94222e-09	2.62486e-06	11.1522	gb:BJ085862 /DB_XREF=gi:17582026 /DB_XREF=BJ085862 /CLONE=XL051e14 /TID=Xl.2458.1 /CNT=3 /FEA=EST /TIER=ConsEnd /STK=2 /UG=Xl.2458 /UG_TITLE=ESTs
Xl.24746.1.S1_at	3.95842	3.53927	3.53927	10.9451	11.1539	11.3159	10.489	3.67898	10.976	-7.297	-28.3104	1.11789e-09	1.06992e-06	12.4844	gb:BF049564 /DB_XREF=gi:10768067 /DB_XREF=db81h11.x1 /CLONE=IMAGE:3379461 /TID=Xl.24746.1 /CNT=25 /FEA=EST /TIER=Stack /STK=9 /UG=Xl.24746 /UG_TITLE=ESTs, Weakly similar to microsomal glutathione S-transferase 3; microsomal glutathione S-transferase III (Homo sapiens) (H.sapiens)
Xl.21811.1.S1_at	3.28245	3.04127	3.04127	10.0548	11.1955	10.5568	9.26868	3.12167	10.2689	-7.14727	-17.2567	6.88353e-08	7.67547e-06	8.96117	gb:BC041228.1 /DB_XREF=gi:27371037 /TID=Xl.21811.1 /CNT=6 /FEA=FLmRNA /TIER=FL /STK=1 /UG=Xl.21811 /DEF=Xenopus laevis, Similar to protein kinase anchoring protein GKAP42, clone MGC:52736 IMAGE:4683888, mRNA, complete cds. /PROD=Similar to protein kinase anchoring proteinGKAP42 /FL=gb:BC041228.1
Xl.2565.1.S1_at	2.21502	3.92206	3.92206	9.80244	10.7328	10.587	10.2028	3.35305	10.3313	-6.9782	-15.5337	1.63499e-07	1.09812e-05	8.13424	gb:BC044001.1 /DB_XREF=gi:27696934 /TID=Xl.2565.1 /CNT=45 /FEA=FLmRNA /TIER=FL+Stack /STK=10 /UG=Xl.2565 /DEF=Xenopus laevis, Similar to alpha-Tubulin at 84B, clone MGC:53359 IMAGE:5571121, mRNA, complete cds. /PROD=Similar to alpha-Tubulin at 84B /FL=gb:BC044001.1
Xl.16507.1.A1_at	3.23292	2.25687	2.25687	9.61677	9.32513	9.24984	9.85535	2.58222	9.51177	-6.92955	-22.8939	6.59713e-09	2.66301e-06	11.064	gb:BJ076999 /DB_XREF=gi:17521915 /DB_XREF=BJ076999 /CLONE=XL059i24 /TID=Xl.16507.1 /CNT=3 /FEA=EST /TIER=ConsEnd /STK=2 /UG=Xl.16507 /UG_TITLE=ESTs, Moderately similar to VAM3_HUMAN Vesicle-associated membrane protein 3 (VAMP-3) (Synaptobrevin 3) (Cellubrevin) (CEB) (H.sapiens)
Xl.15406.1.A1_at	4.05551	3.63992	3.63992	10.6466	10.4912	11.3398	10.3395	3.77845	10.7043	-6.92583	-24.4687	3.78673e-09	2.17453e-06	11.526	gb:BJ054388 /DB_XREF=gi:17421229 /DB_XREF=BJ054388 /CLONE=XL044c07 /TID=Xl.15406.1 /CNT=2 /FEA=EST /TIER=ConsEnd /STK=2 /UG=Xl.15406 /UG_TITLE=ESTs
Xl.13619.1.S1_at	2.5212	2.39359	2.39359	9.61409	9.09865	9.17159	8.58343	2.43613	9.11694	-6.68082	-25.3539	2.81388e-09	2.01984e-06	11.7667	gb:BQ384969 /DB_XREF=gi:21072656 /DB_XREF=NISC_mn09f10.x1 /CLONE=IMAGE:5073162 /TID=Xl.13619.1 /CNT=18 /FEA=EST /TIER=ConsEnd /STK=0 /UG=Xl.13619 /UG_TITLE=ESTs, Moderately similar to hypothetical nuclear factor SBBI22 (Homo sapiens) (H.sapiens)
Xl.5149.1.S1_at	5.57608	5.92869	5.92869	12.337	12.5447	12.3819	12.4498	5.81115	12.4284	-6.6172	-33.4269	2.77344e-10	1.06992e-06	13.4737	gb:CB592843 /DB_XREF=gi:29510699 /DB_XREF=AGENCOURT_13045427 /CLONE=IMAGE:6898315 /TID=Xl.5149.1 /CNT=67 /FEA=EST /TIER=Stack /STK=32 /UG=Xl.5149 /UG_TITLE=ESTs
Xl.3536.2.S1_x_at	4.05551	5.38469	5.38469	11.942	11.695	10.856	11.7233	4.94163	11.5541	-6.61243	-16.5138	9.89132e-08	9.07353e-06	8.61751	gb:BF615663 /DB_XREF=gi:11789488 /DB_XREF=de84h09.x1 /CLONE=IMAGE:3548417 /TID=Xl.3536.2 /CNT=23 /FEA=EST /TIER=Stack /STK=9 /UG=Xl.3536 /UG_TITLE=ESTs, Highly similar to JC1235 transcription factor BTF3a - human (H.sapiens)
Xl.14065.1.A1_at	2.87078	2.39359	2.39359	8.9058	9.16844	9.46313	9.07286	2.55266	9.15256	-6.5999	-28.5185	1.05136e-09	1.06992e-06	12.5305	gb:AW147826 /DB_XREF=gi:6195722 /DB_XREF=da05g03.x1 /CLONE=XENOPUS_SOURCE_ID:xlnoc002d05 /TID=Xl.14065.1 /CNT=4 /FEA=EST /TIER=ConsEnd /STK=1 /UG=Xl.14065 /UG_TITLE=ESTs
Xl.26083.1.A1_at	3.51932	3.39066	3.39066	9.92749	10.0641	10.2791	9.60486	3.43354	9.96888	-6.53533	-29.5053	7.90515e-10	1.06992e-06	12.7413	gb:BJ087887 /DB_XREF=gi:17584923 /DB_XREF=BJ087887 /CLONE=XL091c04 /TID=Xl.26083.1 /CNT=9 /FEA=EST /TIER=Stack /STK=8 /UG=Xl.26083 /UG_TITLE=ESTs, Moderately similar to malate dehydrogenase 2, NAD (mitochondrial); Malate dehydrogenase, mitochondrial (Homo sapiens) (H.sapiens)
Xl.7933.1.S1_at	6.65705	6.28825	6.28825	13.0246	12.894	12.8572	12.9812	6.41118	12.9393	-6.52808	-32.9444	3.13371e-10	1.06992e-06	13.3918	gb:L06232.1 /DB_XREF=gi:214861 /TID=Xl.7933.1 /CNT=179 /FEA=FLmRNA /TIER=FL+Stack /STK=46 /UG=Xl.7933 /DEF=Xenopus laevis beta-tubulin mRNA, complete cds. /PROD=beta-tubulin /FL=gb:L06232.1
Xl.11981.1.S1_at	3.06606	2.61298	2.61298	9.36199	9.14289	9.43238	9.13327	2.76401	9.26763	-6.50363	-30.3154	6.29863e-10	1.06992e-06	12.9059	gb:BE678238 /DB_XREF=gi:10059711 /DB_XREF=df85a01.x1 /CLONE=IMAGE:3746088 /TID=Xl.11981.1 /CNT=9 /FEA=EST /TIER=ConsEnd /STK=2 /UG=Xl.11981 /UG_TITLE=ESTs, Highly similar to S21173 ATP citrate (pro-S)-lyase - human (H.sapiens)
Xl.8902.1.S1_a_at	4.89096	4.04159	4.04159	10.4827	10.6248	11.1955	10.9104	4.32472	10.8034	-6.47866	-22.1391	8.72325e-09	3.03595e-06	10.8259	gb:CB563706 /DB_XREF=gi:29483236 /DB_XREF=AGENCOURT_13346230 /CLONE=IMAGE:6873072 /TID=Xl.8902.1 /CNT=129 /FEA=FLmRNA /TIER=Stack /STK=73 /UG=Xl.8902 /UG_TITLE=Xenopus laevis, similar to translation initiation factor eIF-5A, clone MGC:53096 IMAGE:5542286, mRNA, complete cds /FL=gb:BC045007.1
Xl.5178.2.A1_at	4.5081	3.26707	3.26707	10.269	10.2716	9.92436	10.1637	3.68075	10.1572	-6.47642	-19.6983	2.30357e-08	4.2353e-06	9.97068	gb:BF232507 /DB_XREF=gi:11175220 /DB_XREF=de30a10.x1 /CLONE=IMAGE:3473179 /TID=Xl.5178.2 /CNT=13 /FEA=EST /TIER=Stack /STK=7 /UG=Xl.5178 /UG_TITLE=Xenopus laevis, Similar to actin related protein 23 complex, subunit 1A, 41kDa, clone MGC:52839 IMAGE:4885217, mRNA, complete cds
Xl.4168.1.S2_at	3.02587	2.95372	2.95372	9.83455	9.35995	10.3441	8.19078	2.97777	9.43235	-6.45458	-14.1807	3.44406e-07	1.55384e-05	7.40456	gb:CB561317 /DB_XREF=gi:29480847 /DB_XREF=AGENCOURT_13325067 /CLONE=IMAGE:6880994 /TID=Xl.4168.1 /CNT=121 /FEA=FLmRNA /TIER=Stack /STK=35 /UG=Xl.4168 /UG_TITLE=Xenopus laevis small Rho-like GTPase RhoA (RhoA) mRNA, complete cds /FL=gb:AF151015.1 gb:AF515589.1
Xl.24246.1.A1_at	6.36552	5.10604	5.10604	12.211	11.9558	12.1908	11.4543	5.52586	11.953	-6.42711	-17.8015	5.32608e-08	6.45771e-06	9.20166	gb:BJ084675 /DB_XREF=gi:17580325 /DB_XREF=BJ084675 /CLONE=XL100b14 /TID=Xl.24246.1 /CNT=9 /FEA=EST /TIER=ConsEnd /STK=4 /UG=Xl.24246 /UG_TITLE=ESTs, Moderately similar to ETFA_HUMAN Electron transfer flavoprotein alpha-subunit, mitochondrial precursor (Alpha-ETF) (H.sapiens)
Xl.5747.1.S1_at	4.13154	2.53723	2.53723	9.29664	8.95135	10.1753	9.48184	3.06867	9.47629	-6.40762	-14.2016	3.40292e-07	1.55384e-05	7.41644	gb:CB564393 /DB_XREF=gi:29483923 /DB_XREF=AGENCOURT_13327105 /CLONE=IMAGE:6872931 /TID=Xl.5747.1 /CNT=59 /FEA=FLmRNA /TIER=Stack /STK=9 /UG=Xl.5747 /UG_TITLE=Xenopus laevis, clone MGC:53076 IMAGE:5542078, mRNA, complete cds /FL=gb:BC047969.1
Xl.5140.1.A1_at	5.30281	3.95425	3.95425	10.7687	10.8226	10.8409	10.6188	4.40377	10.7628	-6.35899	-18.5517	3.7861e-08	5.43542e-06	9.51799	gb:BG885934 /DB_XREF=gi:14263026 /DB_XREF=de10b02.x1 /CLONE=IMAGE:3437499 /TID=Xl.5140.1 /CNT=4 /FEA=EST /TIER=ConsEnd /STK=4 /UG=Xl.5140 /UG_TITLE=ESTs, Weakly similar to RIKEN cDNA 2410116G06 (Mus musculus) (M.musculus)
Xl.5160.1.S1_at	2.72837	2.7814	2.7814	8.01358	9.64101	10.1734	8.6588	2.76372	9.12171	-6.35798	-13.3667	5.56971e-07	2.0519e-05	6.92622	gb:BJ057196 /DB_XREF=gi:17469968 /DB_XREF=BJ057196 /CLONE=XL034f03 /TID=Xl.5160.1 /CNT=44 /FEA=EST /TIER=Stack /STK=9 /UG=Xl.5160 /UG_TITLE=ESTs, Highly similar to hypothetical protein YR-29; TGF beta inducible nuclear protein 1; hairy cell leukemia protein 1 (Homo sapiens) (H.sapiens)
Xl.19459.1.S1_at	3.51932	3.04127	3.04127	10.1492	9.39925	9.19885	9.36656	3.20062	9.52847	-6.32785	-22.4686	7.71296e-09	2.94967e-06	10.9312	gb:BQ385898 /DB_XREF=gi:21073585 /DB_XREF=NISC_mn15a07.x1 /CLONE=IMAGE:5073324 /TID=Xl.19459.1 /CNT=8 /FEA=EST /TIER=ConsEnd /STK=0 /UG=Xl.19459 /UG_TITLE=ESTs, Moderately similar to I56489 neuropolypeptide h3, brain - human (fragment) (H.sapiens)
Xl.4515.1.S1_at	5.8697	4.78452	4.78452	11.0074	11.1936	11.3651	11.8097	5.14624	11.344	-6.19772	-18.6628	3.60359e-08	5.23889e-06	9.56343	gb:BC041204.1 /DB_XREF=gi:27735412 /TID=Xl.4515.1 /CNT=307 /FEA=FLmRNA /TIER=FL+Stack /STK=95 /UG=Xl.4515 /DEF=Xenopus laevis, Similar to cold inducible RNA-binding protein, clone MGC:52663 IMAGE:4681597, mRNA, complete cds. /PROD=Similar to cold inducible RNA-binding protein /FL=gb:BC041204.1 gb:AF278702.1
Xl.5466.1.A1_at	3.85687	5.7562	5.7562	10.9908	11.1463	11.4543	11.4851	5.12309	11.2691	-6.14604	-13.4245	5.37809e-07	2.01197e-05	6.96124	gb:BJ087266 /DB_XREF=gi:17584017 /DB_XREF=BJ087266 /CLONE=XL055p06 /TID=Xl.5466.1 /CNT=15 /FEA=EST /TIER=Stack /STK=10 /UG=Xl.5466 /UG_TITLE=ESTs, Moderately similar to SYH_HUMAN Histidyl-tRNA synthetase (Histidine--tRNA ligase) (HisRS) (H.sapiens)
Xl.311.1.S1_at	7.10721	4.82015	4.82015	11.6453	11.8174	12.0109	11.326	5.58251	11.6999	-6.11737	-11.365	2.05701e-06	4.7492e-05	5.60112	gb:AF017778.1 /DB_XREF=gi:2772903 /GEN=dazl /TID=Xl.311.1 /CNT=10 /FEA=FLmRNA /TIER=FL /STK=2 /UG=Xl.311 /DEF=Xenopus laevis DAZ-like protein (dazl) mRNA, complete cds. /PROD=DAZ-like protein /FL=gb:AF017778.1
Xl.5792.1.A1_at	5.16792	4.11408	4.11408	10.1828	10.3918	10.589	10.9371	4.46536	10.5252	-6.05984	-18.7785	3.42376e-08	5.10674e-06	9.61041	gb:BJ053583 /DB_XREF=gi:17420924 /DB_XREF=BJ053583 /CLONE=XL039g17 /TID=Xl.5792.1 /CNT=3 /FEA=EST /TIER=ConsEnd /STK=2 /UG=Xl.5792 /UG_TITLE=ESTs
Xl.8046.1.S1_at	2.95372	4.55684	4.55684	10.3507	10.7911	9.26037	9.65278	4.02247	10.0137	-5.99125	-12.0413	1.29442e-06	3.57687e-05	6.0747	gb:AW198888 /DB_XREF=gi:6479457 /DB_XREF=da08c04.x1 /CLONE=XENOPUS_SOURCE_ID:xlnoc002n07 /TID=Xl.8046.1 /CNT=8 /FEA=EST /TIER=ConsEnd /STK=1 /UG=Xl.8046 /UG_TITLE=ESTs, Weakly similar to JT0563 coupling factor 6 precursor, mitochondrial - human (H.sapiens)
Xl.8868.1.A1_at	2.44153	2.61555	2.61555	8.61732	8.77386	8.4755	8.30981	2.55754	8.54412	-5.98658	-29.4599	8.00787e-10	1.06992e-06	12.7319	gb:BQ387424 /DB_XREF=gi:21075111 /DB_XREF=NISC_mn23g04.x1 /CLONE=IMAGE:5074374 /TID=Xl.8868.1 /CNT=6 /FEA=EST /TIER=ConsEnd /STK=1 /UG=Xl.8868 /UG_TITLE=ESTs, Weakly similar to T12471 hypothetical protein DKFZp564E1962.1 - human (fragment) (H.sapiens)
Xl.702.1.S1_a_at	2.23429	2.86681	2.86681	8.91658	8.67149	8.114	8.73817	2.65597	8.61006	-5.95409	-21.7387	1.01549e-08	3.12424e-06	10.6948	gb:J03167.1 /DB_XREF=gi:214094 /TID=Xl.702.1 /CNT=35 /FEA=FLmRNA /TIER=FL+Stack /STK=7 /UG=Xl.702 /UG_TITLE=X.laevis cyclin B2 mRNA, complete cds /DEF=X.laevis cyclin B2 mRNA, complete cds. /FL=gb:J03167.1
Xl.2565.3.S1_x_at	5.07137	3.51528	3.51528	10.1266	10.2828	9.47526	9.89379	4.03397	9.94463	-5.91065	-14.3926	3.05167e-07	1.46035e-05	7.52403	gb:CB561588 /DB_XREF=gi:29481118 /DB_XREF=AGENCOURT_13329788 /CLONE=IMAGE:6879903 /TID=Xl.2565.3 /CNT=122 /FEA=EST /TIER=Stack /STK=34 /UG=Xl.2565 /UG_TITLE=Xenopus laevis, Similar to alpha-Tubulin at 84B, clone MGC:53359 IMAGE:5571121, mRNA, complete cds
Xl.18176.1.A1_at	4.33589	4.83849	4.83849	10.5918	10.4839	10.5202	10.7271	4.67096	10.5808	-5.9098	-27.62	1.37474e-09	1.12778e-06	12.3278	gb:BI312695 /DB_XREF=gi:14987022 /DB_XREF=dai25g01.x1 /CLONE=IMAGE:4962984 /TID=Xl.18176.1 /CNT=1 /FEA=EST /TIER=ConsEnd /STK=1 /UG=Xl.18176 /UG_TITLE=ESTs, Weakly similar to PSD5_HUMAN 26S proteasome non-ATPase regulatory subunit 5 (26S proteasome subunit S5B) (26S protease subunit S5 basic) (H.sapiens)
Xl.14717.1.S1_at	4.78156	3.15648	3.15648	9.736	10.0788	10.0283	8.51522	3.69817	9.58956	-5.89139	-11.465	1.91786e-06	4.64696e-05	5.67297	gb:BM181067 /DB_XREF=gi:17405138 /DB_XREF=daj85h02.x1 /CLONE=IMAGE:5129715 /TID=Xl.14717.1 /CNT=9 /FEA=EST /TIER=ConsEnd /STK=2 /UG=Xl.14717 /UG_TITLE=ESTs
Xl.5604.1.A1_at	5.21552	4.96721	4.96721	10.8709	10.8977	11.1395	10.8049	5.04998	10.9282	-5.87827	-29.7524	7.37129e-10	1.06992e-06	12.7923	gb:BJ097953 /DB_XREF=gi:17599565 /DB_XREF=BJ097953 /CLONE=XL143p03 /TID=Xl.5604.1 /CNT=5 /FEA=EST /TIER=ConsEnd /STK=2 /UG=Xl.5604 /UG_TITLE=ESTs, Moderately similar to TBG2_HUMAN Tubulin gamma-2 chain (Gamma-2 tubulin) (H.sapiens)
Xl.4744.1.S1_at	4.31159	4.44402	4.44402	10.5098	10.6444	10.1008	9.84384	4.39988	10.2747	-5.87485	-23.8428	4.70141e-09	2.53634e-06	11.3478	gb:BE491637 /DB_XREF=gi:9611170 /DB_XREF=db93c06.x1 /CLONE=IMAGE:3380554 /TID=Xl.4744.1 /CNT=11 /FEA=EST /TIER=ConsEnd /STK=2 /UG=Xl.4744 /UG_TITLE=ESTs, Moderately similar to A40085 ubiquitin thiolesterase (EC 3.1.2.15) L3 - human (H.sapiens)
Xl.2839.1.S1_at	5.51053	5.72295	5.72295	11.5667	11.4763	11.4826	11.569	5.65215	11.5236	-5.8715	-31.6582	4.37813e-10	1.06992e-06	13.1628	gb:BC041270.1 /DB_XREF=gi:27370894 /TID=Xl.2839.1 /CNT=84 /FEA=FLmRNA /TIER=FL+Stack /STK=15 /UG=Xl.2839 /DEF=Xenopus laevis, Similar to protein translocation complex beta, clone MGC:52846 IMAGE:4885342, mRNA, complete cds. /PROD=Similar to protein translocation complex beta /FL=gb:BC041270.1
Xl.18853.1.A1_at	3.17422	2.67348	2.67348	9.2558	9.31233	8.32443	7.79938	2.84039	8.67298	-5.83259	-14.7703	2.46986e-07	1.29753e-05	7.73205	gb:BI446883 /DB_XREF=gi:15271590 /DB_XREF=daa89g10.x3 /CLONE=IMAGE:4084794 /TID=Xl.18853.1 /CNT=1 /FEA=EST /TIER=ConsEnd /STK=1 /UG=Xl.18853 /UG_TITLE=ESTs, Weakly similar to hypothetical protein MGC16186 (Homo sapiens) (H.sapiens)
Xl.7482.2.A1_x_at	2.5212	3.7754	3.7754	9.7056	9.25062	8.65916	8.68332	3.35733	9.07467	-5.71734	-14.4681	2.92413e-07	1.44878e-05	7.56611	gb:BU908393 /DB_XREF=gi:24090307 /DB_XREF=AGENCOURT_10509414 /CLONE=IMAGE:6633818 /TID=Xl.7482.2 /CNT=9 /FEA=EST /TIER=Stack /STK=6 /UG=Xl.7482 /UG_TITLE=Xenopus laevis, clone MGC:53533 IMAGE:5572768, mRNA, complete cds
Xl.3815.1.S1_a_at	5.76645	4.44402	4.44402	10.2668	9.73975	11.2356	11.0935	4.88483	10.5839	-5.69908	-12.2779	1.10689e-06	3.29878e-05	6.23382	gb:M60681.1 /DB_XREF=gi:214034 /GEN=cdc2x1.2 /TID=Xl.3815.1 /CNT=1 /FEA=FLmRNA /TIER=FL /STK=1 /UG=Xl.3815 /DEF=Xenopus laevis cdc2 kinase homologous protein cdc2x1.2) mRNA, complete cds. /PROD=p34cdc2x1.2 kinase /FL=gb:M60681.1
Xl.20555.2.S1_at	5.12186	3.08046	3.08046	8.93228	9.53843	9.70204	9.55268	3.76093	9.43136	-5.67043	-11.4	2.00699e-06	4.73419e-05	5.62638	gb:BJ047075 /DB_XREF=gi:17369816 /DB_XREF=BJ047075 /CLONE=XL015g14 /TID=Xl.20555.2 /CNT=7 /FEA=EST /TIER=Stack /STK=6 /UG=Xl.20555 /UG_TITLE=X.laevis mRNA for calreticulin (clone 3)
Xl.16441.1.A1_at	3.59108	2.86681	2.86681	9.12613	8.06698	9.22585	8.58987	3.10823	8.75221	-5.64397	-16.6279	9.34628e-08	8.94517e-06	8.67152	gb:BJ088741 /DB_XREF=gi:17586147 /DB_XREF=BJ088741 /CLONE=XL093p03 /TID=Xl.16441.1 /CNT=6 /FEA=EST /TIER=ConsEnd /STK=2 /UG=Xl.16441 /UG_TITLE=ESTs, Weakly similar to U3 snoRNP-associated 55-kDa protein (Homo sapiens) (H.sapiens)
Xl.8138.1.S1_at	3.59993	4.35759	4.35759	9.79755	10.0969	9.74884	9.28504	4.10503	9.73209	-5.62705	-19.7167	2.28571e-08	4.2353e-06	9.97769	gb:BJ052309 /DB_XREF=gi:17496379 /DB_XREF=BJ052309 /CLONE=XL041b11 /TID=Xl.8138.1 /CNT=114 /FEA=mRNA /TIER=Stack /STK=7 /UG=Xl.8138 /UG_TITLE=Xenopus laevis mRNA for high mobility group HMG-17 (hmg-17 gene)
Xl.445.1.S1_at	6.99981	4.30639	4.30639	10.9634	10.7009	11.4585	10.193	5.2042	10.829	-5.62476	-8.64934	1.75244e-05	0.000188984	3.36981	gb:AF111423.1 /DB_XREF=gi:4191595 /TID=Xl.445.1 /CNT=22 /FEA=FLmRNA /TIER=FL+Stack /STK=6 /UG=Xl.445 /DEF=Xenopus laevis chromosome condensation protein XCAP-G mRNA, complete cds. /PROD=chromosome condensation protein XCAP-G /FL=gb:AF111423.1
Xl.7149.1.A1_at	2.40615	2.48743	2.48743	7.83896	7.74827	8.04646	8.70573	2.46034	8.08485	-5.62451	-21.145	1.27859e-08	3.4143e-06	10.494	gb:BG812130 /DB_XREF=gi:14183110 /DB_XREF=dab99h03.x1 /CLONE=IMAGE:4405853 /TID=Xl.7149.1 /CNT=11 /FEA=mRNA /TIER=ConsEnd /STK=0 /UG=Xl.7149 /UG_TITLE=Xenopus laevis zygotic DNA replication factor MCM6a mRNA, partial cds
Xl.25536.1.A1_at	3.40603	4.90241	4.90241	9.93572	9.59365	10.3003	10.2828	4.40362	10.0281	-5.6245	-14.1537	3.49804e-07	1.55717e-05	7.38917	gb:BE677987 /DB_XREF=gi:10059355 /DB_XREF=df81f09.x1 /CLONE=IMAGE:3745769 /TID=Xl.25536.1 /CNT=13 /FEA=EST /TIER=Stack /STK=12 /UG=Xl.25536 /UG_TITLE=ESTs, Weakly similar to hypothetical protein MGC2577 (Homo sapiens) (H.sapiens)
Xl.22040.2.A1_at	2.95372	3.92206	3.92206	9.15317	9.22171	9.41277	9.09858	3.59928	9.22156	-5.62228	-20.0312	2.0045e-08	4.11102e-06	10.0956	gb:BJ092011 /DB_XREF=gi:17590904 /DB_XREF=BJ092011 /CLONE=XL090l21 /TID=Xl.22040.2 /CNT=16 /FEA=EST /TIER=Stack /STK=7 /UG=Xl.22040 /UG_TITLE=ESTs, Weakly similar to ring finger protein 10; KIAA0262 gene product (Homo sapiens) (H.sapiens)
Xl.4839.1.S1_at	3.21708	4.47868	4.47868	10.1985	9.55389	9.05404	9.85538	4.05815	9.66544	-5.60729	-14.3038	3.2098e-07	1.50468e-05	7.47418	gb:CD324878 /DB_XREF=gi:31089429 /DB_XREF=AGENCOURT_14164270 /CLONE=IMAGE:6949344 /TID=Xl.4839.1 /CNT=45 /FEA=FLmRNA /TIER=Stack /STK=9 /UG=Xl.4839 /UG_TITLE=Xenopus laevis, Similar to H1 histone family, member X, clone MGC:53643 IMAGE:4884567, mRNA, complete cds /FL=gb:BC041758.1
Xl.12723.1.A1_at	3.51932	4.44988	4.44988	10.1372	9.58575	9.48682	9.76296	4.13969	9.74318	-5.60349	-18.8286	3.34912e-08	5.10674e-06	9.63061	gb:BJ076819 /DB_XREF=gi:17521735 /DB_XREF=BJ076819 /CLONE=XL058n17 /TID=Xl.12723.1 /CNT=4 /FEA=EST /TIER=ConsEnd /STK=1 /UG=Xl.12723 /UG_TITLE=ESTs
Xl.7068.1.S1_at	5.04164	5.024	5.024	10.7114	10.3666	10.71	10.6792	5.02988	10.6168	-5.58689	-28.8133	9.6453e-10	1.06992e-06	12.5947	gb:AW765944 /DB_XREF=gi:7697923 /DB_XREF=da80c11.y1 /CLONE=IMAGE:3201236 /TID=Xl.7068.1 /CNT=10 /FEA=EST /TIER=Stack /STK=7 /UG=Xl.7068 /UG_TITLE=ESTs, Moderately similar to RLA2_HUMAN 60S acidic ribosomal protein P2 (H.sapiens)
Xl.3901.1.A1_at	6.27952	3.04127	3.04127	10.396	10.2909	10.1492	7.96236	4.12069	9.69964	-5.57895	-6.26285	0.000191795	0.000904254	0.830331	gb:BF232515 /DB_XREF=gi:11175236 /DB_XREF=de30d02.x1 /CLONE=IMAGE:3473307 /TID=Xl.3901.1 /CNT=1 /FEA=EST /TIER=ConsEnd /STK=1 /UG=Xl.3901 /UG_TITLE=ESTs, Weakly similar to T03G11.3.p (Caenorhabditis elegans) (C.elegans)
Xl.6585.1.S1_at	3.05042	2.62761	2.62761	8.05435	9.13757	8.53452	7.65188	2.76855	8.34458	-5.57603	-15.7869	1.4319e-07	1.0343e-05	8.26253	gb:BJ080015 /DB_XREF=gi:17573519 /DB_XREF=BJ080015 /CLONE=XL074d17 /TID=Xl.6585.1 /CNT=32 /FEA=mRNA /TIER=Stack /STK=6 /UG=Xl.6585 /UG_TITLE=Xenopus laevis, Similar to DNA segment, Chr 10, ERATO Doi 773, expressed, clone IMAGE:4885432, mRNA, partial cds
Xl.4224.1.S1_a_at	3.21946	3.21597	3.21597	8.26423	8.59371	9.41074	8.84527	3.21713	8.77849	-5.56136	-19.6317	2.36914e-08	4.2353e-06	9.94536	gb:BG161108 /DB_XREF=gi:12695027 /DB_XREF=dab65d12.x1 /CLONE=IMAGE:4201799 /TID=Xl.4224.1 /CNT=51 /FEA=mRNA /TIER=Stack /STK=15 /UG=Xl.4224 /UG_TITLE=X.laevis mRNA for translation initiation factor eIF4A II, partial
Xl.2613.1.S1_at	2.25577	4.55684	4.55684	9.77129	9.65766	8.73003	9.23374	3.78982	9.34818	-5.55836	-9.8041	6.62486e-06	0.000100059	4.39012	gb:BC044997.1 /DB_XREF=gi:27924332 /TID=Xl.2613.1 /CNT=42 /FEA=FLmRNA /TIER=FL+Stack /STK=9 /UG=Xl.2613 /DEF=Xenopus laevis, Similar to chaperonin containing TCP1, subunit 5 (epsilon), clone MGC:53061 IMAGE:5541942, mRNA, complete cds. /PROD=Similar to chaperonin containing TCP1, subunit 5(epsilon) /FL=gb:BC044997.1
Xl.16601.1.A1_at	5.9487	5.00048	5.00048	10.9505	10.7366	10.8977	10.9063	5.31655	10.8728	-5.55624	-20.2973	1.79642e-08	3.92716e-06	10.1935	gb:BJ048042 /DB_XREF=gi:17406099 /DB_XREF=BJ048042 /CLONE=XL018i06 /TID=Xl.16601.1 /CNT=3 /FEA=EST /TIER=ConsEnd /STK=1 /UG=Xl.16601 /UG_TITLE=ESTs, Moderately similar to peptidase (mitochondrial processing) beta; mitochondrial processing peptidase-beta (Homo sapiens) (H.sapiens)
Xl.11443.1.S1_at	3.40603	4.1723	4.1723	9.64256	9.05267	9.97285	9.1998	3.91688	9.46697	-5.55009	-17.9773	4.91065e-08	6.26653e-06	9.27731	gb:BC041251.1 /DB_XREF=gi:27371268 /TID=Xl.11443.1 /CNT=16 /FEA=FLmRNA /TIER=FL /STK=3 /UG=Xl.11443 /DEF=Xenopus laevis, Similar to adaptor-related protein complex AP-3, sigma 1 subunit, clone MGC:52794 IMAGE:4724748, mRNA, complete cds. /PROD=Similar to adaptor-related protein complex AP-3,sigma 1 subunit /FL=gb:BC041251.1
Xl.25707.1.S1_at	3.66933	3.88461	3.88461	9.47058	8.93133	10.2383	8.79729	3.81285	9.35937	-5.54652	-15.8496	1.38605e-07	1.02782e-05	8.29393	gb:BJ056156 /DB_XREF=gi:17423667 /DB_XREF=BJ056156 /CLONE=XL008p01 /TID=Xl.25707.1 /CNT=25 /FEA=EST /TIER=Stack /STK=9 /UG=Xl.25707 /UG_TITLE=ESTs, Highly similar to RUXE_HUMAN Small nuclear ribonucleoprotein E (snRNP-E) (Sm protein E) (Sm-E) (SmE) (H.sapiens)
Xl.3862.2.S1_x_at	2.59167	2.7814	2.7814	8.32589	8.36704	8.1246	8.2342	2.71816	8.26293	-5.54478	-29.2909	8.40356e-10	1.06992e-06	12.6965	gb:CD361360 /DB_XREF=gi:31132771 /DB_XREF=AGENCOURT_14238280 /CLONE=IMAGE:6957044 /TID=Xl.3862.2 /CNT=67 /FEA=EST /TIER=Stack /STK=22 /UG=Xl.3862 /UG_TITLE=Xenopus laevis translation initiation factor SUI1 (SUI1) mRNA, complete cds
Xl.12560.1.S1_at	3.06606	3.92206	3.92206	9.1094	9.0425	9.10671	9.45757	3.63673	9.17905	-5.54232	-20.541	1.62687e-08	3.82326e-06	10.2817	gb:BC043859.1 /DB_XREF=gi:27882635 /TID=Xl.12560.1 /CNT=35 /FEA=FLmRNA /TIER=FL+Stack /STK=10 /UG=Xl.12560 /DEF=Xenopus laevis, Similar to succinate dehydrogenase complex, subunit B, iron sulfur (Ip), clone MGC:53699 IMAGE:4889400, mRNA, complete cds. /PROD=Similar to succinate dehydrogenase complex,subunit B, iron sulfur (Ip) /FL=gb:BC043859.1
Xl.217.2.S1_at	5.55217	4.44402	4.44402	9.7636	10.0343	10.5698	10.9207	4.8134	10.3221	-5.5087	-14.4966	2.87766e-07	1.44323e-05	7.58189	gb:AJ243889.1 /DB_XREF=gi:5764079 /GEN=CAN /TID=Xl.217.2 /CNT=12 /FEA=mRNA /TIER=ConsEnd /STK=0 /UG=Xl.217 /DEF=Xenopus laevis mRNA for nucleoporin CAN (CAN gene). /PROD=nucleoporin CAN
Xl.7947.1.A1_at	4.0694	4.14167	4.14167	10.1859	9.77254	9.66374	8.73018	4.11758	9.58808	-5.4705	-16.482	1.00493e-07	9.07353e-06	8.6024	gb:BJ082612 /DB_XREF=gi:17577320 /DB_XREF=BJ082612 /CLONE=XL081l04 /TID=Xl.7947.1 /CNT=4 /FEA=EST /TIER=ConsEnd /STK=3 /UG=Xl.7947 /UG_TITLE=ESTs
Xl.6693.1.S1_at	4.47252	3.44612	3.44612	8.90531	8.77754	9.44972	9.86278	3.78825	9.24884	-5.46059	-15.0042	2.17214e-07	1.21102e-05	7.85779	gb:BM180518 /DB_XREF=gi:17404589 /DB_XREF=daj36b11.x1 /CLONE=IMAGE:5078372 /TID=Xl.6693.1 /CNT=14 /FEA=EST /TIER=ConsEnd /STK=5 /UG=Xl.6693 /UG_TITLE=ESTs, Moderately similar to hypothetical protein FLJ10099 (Homo sapiens) (H.sapiens)
Xl.21809.1.S1_at	4.00191	4.44402	4.44402	9.49304	9.18847	10.2129	10.1169	4.29665	9.75283	-5.45618	-18.0745	4.69656e-08	6.06067e-06	9.31874	gb:BC041555.1 /DB_XREF=gi:27371156 /TID=Xl.21809.1 /CNT=5 /FEA=FLmRNA /TIER=FL /STK=1 /UG=Xl.21809 /DEF=Xenopus laevis, Similar to calcium modulating ligand, clone MGC:53900 IMAGE:5543511, mRNA, complete cds. /PROD=Similar to calcium modulating ligand /FL=gb:BC041555.1
Xl.5223.1.S1_at	3.70169	3.89153	3.89153	9.71769	8.65286	9.493	9.26941	3.82825	9.28324	-5.45499	-19.6703	2.33088e-08	4.2353e-06	9.96005	gb:BE189176 /DB_XREF=gi:9730065 /DB_XREF=db69c12.x1 /CLONE=IMAGE:3378262 /TID=Xl.5223.1 /CNT=4 /FEA=EST /TIER=ConsEnd /STK=2 /UG=Xl.5223 /UG_TITLE=ESTs
Xl.5800.1.A1_at	3.06606	2.49227	2.49227	8.33511	7.96484	8.25277	7.99262	2.68353	8.13633	-5.4528	-23.4584	5.38431e-09	2.57661e-06	11.2349	gb:AW764667 /DB_XREF=gi:7696622 /DB_XREF=da89d10.x1 /TID=Xl.5800.1 /CNT=1 /FEA=EST /TIER=ConsEnd /STK=1 /UG=Xl.5800 /UG_TITLE=ESTs, Weakly similar to OXA1_HUMAN Cytochrome oxidase biogenesis protein OXA1, mitochondrial precursor (OXA1-like protein) (OXA1Hs) (H.sapiens)
Xl.21150.1.S1_at	5.01542	5.80063	5.80063	11.4734	10.2323	10.6092	11.592	5.5389	10.9767	-5.43782	-14.0044	3.81352e-07	1.63586e-05	7.30362	gb:CD099315 /DB_XREF=gi:30752418 /DB_XREF=AGENCOURT_13998341 /CLONE=IMAGE:6940207 /TID=Xl.21150.1 /CNT=14 /FEA=EST /TIER=ConsEnd /STK=5 /UG=Xl.21150 /UG_TITLE=ESTs, Weakly similar to PGD2_HUMAN Glutathione-requiring prostaglandin D synthase (Glutathione-dependent PGD synthetase) (Prostaglandin-H2 D-isomerase) (Hematopoietic prostaglandin D synthase) (H-PGDS) (H.sapiens)
Xl.7006.1.S1_at	3.40603	3.26707	3.26707	8.71236	8.79347	8.63903	8.84354	3.31339	8.7471	-5.43371	-29.3186	8.3372e-10	1.06992e-06	12.7024	gb:BJ052469 /DB_XREF=gi:17498517 /DB_XREF=BJ052469 /CLONE=XL041j23 /TID=Xl.7006.1 /CNT=63 /FEA=mRNA /TIER=Stack /STK=12 /UG=Xl.7006 /UG_TITLE=Xenopus laevis, Similar to p53-induced protein PIGPC1, clone IMAGE:5543423, mRNA
Xl.18068.1.A1_at	4.47929	4.09838	4.09838	9.74623	9.66979	9.39034	9.82114	4.22535	9.65688	-5.43152	-25.3867	2.78357e-09	2.01984e-06	11.7754	gb:BG885013 /DB_XREF=gi:14262105 /DB_XREF=dac34g04.x1 /CLONE=IMAGE:4408903 /TID=Xl.18068.1 /CNT=2 /FEA=EST /TIER=ConsEnd /STK=1 /UG=Xl.18068 /UG_TITLE=ESTs
Xl.6496.1.S1_at	5.67284	5.06097	5.06097	11.1323	10.6962	10.2762	10.5241	5.26492	10.6572	-5.39228	-19.5732	2.42856e-08	4.2353e-06	9.923	gb:BG018273 /DB_XREF=gi:12473326 /DB_XREF=de66g03.y1 /CLONE=IMAGE:3516845 /TID=Xl.6496.1 /CNT=8 /FEA=EST /TIER=Stack /STK=6 /UG=Xl.6496 /UG_TITLE=ESTs, Moderately similar to S55054 Sm protein G - human (H.sapiens)
Xl.1079.1.S1_at	5.73288	6.78432	6.78432	11.675	11.926	11.4316	12.2442	6.43384	11.8192	-5.38537	-16.4139	1.03974e-07	9.25693e-06	8.56987	gb:S64727.1 /DB_XREF=gi:238858 /GEN=ferritin /TID=Xl.1079.1 /CNT=157 /FEA=mRNA /TIER=Stack /STK=59 /UG=Xl.1079 /DEF=ferritin (Xenopus laevis, XL2 cells, mRNA, 1388 nt). /PROD=ferritin
Xl.2251.1.S1_s_at	5.07137	5.6256	5.6256	10.3588	10.7496	11.1463	11.0023	5.44086	10.8142	-5.37339	-20.2317	1.84543e-08	3.92716e-06	10.1695	gb:AY168926.1 /DB_XREF=gi:29468100 /TID=Xl.2251.1 /CNT=23 /FEA=FLmRNA /TIER=FL+Stack /STK=8 /UG=Xl.2251 /DEF=Xenopus laevis heterochromatin protein 1 gamma mRNA, complete cds. /PROD=heterochromatin protein 1 gamma /FL=gb:AY168926.1
Xl.7541.1.A1_at	3.15648	2.95372	2.95372	7.78291	8.42438	8.89358	8.43502	3.02131	8.38397	-5.36267	-19.3522	2.66831e-08	4.5067e-06	9.83777	gb:BJ079935 /DB_XREF=gi:17524851 /DB_XREF=BJ079935 /CLONE=XL073p17 /TID=Xl.7541.1 /CNT=17 /FEA=EST /TIER=Stack /STK=10 /UG=Xl.7541 /UG_TITLE=ESTs, Highly similar to RIKEN cDNA 2310005G07 (Mus musculus) (M.musculus)
Xl.2855.1.A1_at	4.83142	2.95372	2.95372	9.67249	8.40845	9.14118	8.53186	3.57962	8.93849	-5.35887	-10.417	4.11014e-06	7.40171e-05	4.88677	gb:BM191868 /DB_XREF=gi:17527831 /DB_XREF=dag37f01.x3 /CLONE=IMAGE:4783632 /TID=Xl.2855.1 /CNT=5 /FEA=EST /TIER=ConsEnd /STK=2 /UG=Xl.2855 /UG_TITLE=ESTs, Moderately similar to 2207342A SRB protein (Homo sapiens) (H.sapiens)
Xl.8044.1.S1_at	3.40603	2.71799	2.71799	9.0529	7.8109	7.83664	8.43245	2.94734	8.28322	-5.33588	-15.0876	2.07575e-07	1.19175e-05	7.90211	gb:AW198860 /DB_XREF=gi:6479429 /DB_XREF=da07h10.x1 /CLONE=XENOPUS_SOURCE_ID:xlnoc002l20 /TID=Xl.8044.1 /CNT=7 /FEA=EST /TIER=ConsEnd /STK=5 /UG=Xl.8044 /UG_TITLE=ESTs, Highly similar to U123_HUMAN Hypothetical protein BK223H9.2MGC1346 (H.sapiens)
Xl.9119.1.A1_at	2.95372	2.53723	2.53723	8.08074	7.00157	8.24729	8.69257	2.67606	8.00554	-5.32948	-13.9364	3.96756e-07	1.68145e-05	7.26433	gb:BG346501 /DB_XREF=gi:13166925 /DB_XREF=daa37d08.x1 /CLONE=IMAGE:4058534 /TID=Xl.9119.1 /CNT=1 /FEA=EST /TIER=ConsEnd /STK=1 /UG=Xl.9119 /UG_TITLE=EST
Xl.23855.1.S1_at	6.61371	5.82774	5.82774	11.174	11.0815	11.7233	11.4625	6.08973	11.3603	-5.2706	-18.9029	3.24156e-08	5.03099e-06	9.66049	gb:BQ384477 /DB_XREF=gi:21072164 /DB_XREF=NISC_mn06h12.x1 /CLONE=IMAGE:5049455 /TID=Xl.23855.1 /CNT=13 /FEA=EST /TIER=ConsEnd /STK=0 /UG=Xl.23855 /UG_TITLE=ESTs, Weakly similar to NUML_HUMAN NADH-ubiquinone oxidoreductase MLRQ subunit (Complex I-MLRQ) (CI-MLRQ) (H.sapiens)
Xl.25945.1.A1_at	4.56887	5.29568	5.29568	10.4005	9.94039	10.7412	10.1546	5.05341	10.3092	-5.25574	-18.5192	3.84141e-08	5.44673e-06	9.50463	gb:BU908554 /DB_XREF=gi:24090468 /DB_XREF=AGENCOURT_10509458 /CLONE=IMAGE:6634040 /TID=Xl.25945.1 /CNT=11 /FEA=EST /TIER=Stack /STK=7 /UG=Xl.25945 /UG_TITLE=ESTs, Moderately similar to TCPD_HUMAN T-complex protein 1, delta subunit (TCP-1-delta) (CCT-delta) (Stimulator of TAR RNA binding) (H.sapiens)
Xl.4814.1.A1_at	4.31159	4.55684	4.55684	9.92181	9.41352	9.85049	9.73184	4.47509	9.72942	-5.25432	-24.771	3.41762e-09	2.17453e-06	11.6097	gb:BJ052570 /DB_XREF=gi:17511446 /DB_XREF=BJ052570 /CLONE=XL041o12 /TID=Xl.4814.1 /CNT=9 /FEA=EST /TIER=Stack /STK=6 /UG=Xl.4814 /UG_TITLE=ESTs, Weakly similar to ST13_HUMAN Hsc70-interacting protein (Hip) (Putative tumor suppressor ST13) (Progesterone receptor-associated p48 protein) (H.sapiens)
Xl.24810.1.S1_at	5.07137	3.63992	3.63992	9.23651	9.36302	9.19973	9.64433	4.11707	9.3609	-5.24383	-14.3044	3.20855e-07	1.50468e-05	7.47456	gb:BJ049346 /DB_XREF=gi:17376028 /DB_XREF=BJ049346 /CLONE=XL025n04 /TID=Xl.24810.1 /CNT=59 /FEA=EST /TIER=Stack /STK=12 /UG=Xl.24810 /UG_TITLE=ESTs, Weakly similar to hypothetical protein FLJ22184 (Homo sapiens) (H.sapiens)
Xl.21804.1.S1_s_at	3.06606	3.57148	3.57148	8.4812	8.36704	8.82307	8.81683	3.40301	8.62203	-5.21903	-22.2981	8.21849e-09	2.94967e-06	10.877	gb:M86928.1 /DB_XREF=gi:214096 /TID=Xl.21804.1 /CNT=25 /FEA=FLmRNA /TIER=FL /STK=1 /UG=Xl.21804 /UG_TITLE=Frog (clone x7059) 14-3-3 protein mRNA, complete cds /DEF=Frog (clone x7059) 14-3-3 protein mRNA, complete cds. /FL=gb:M86928.1
Xl.4584.1.S1_at	2.87078	3.15648	3.15648	7.9016	7.34778	8.7019	9.11699	3.06125	8.26707	-5.20583	-12.7817	8.00201e-07	2.61832e-05	6.56215	gb:AF257236.1 /DB_XREF=gi:11527139 /GEN=PABPII /TID=Xl.4584.1 /CNT=23 /FEA=FLmRNA /TIER=FL /STK=3 /UG=Xl.4584 /DEF=Xenopus laevis poly(A) binding protein II (PABPII) mRNA, complete cds. /PROD=poly(A) binding protein II /FL=gb:AF257236.1
Xl.6859.1.S1_x_at	2.87078	3.32136	3.32136	8.77415	8.32717	8.15218	8.2037	3.17117	8.3643	-5.19314	-21.6236	1.06139e-08	3.12424e-06	10.6564	gb:BG347657 /DB_XREF=gi:13168081 /DB_XREF=dab94f03.x1 /CLONE=IMAGE:4405372 /TID=Xl.6859.1 /CNT=3 /FEA=EST /TIER=ConsEnd /STK=2 /UG=Xl.6859 /UG_TITLE=ESTs, Highly similar to LSM8_HUMAN U6 snRNA-associated Sm-like protein LSm8 (H.sapiens)
Xl.11101.1.A1_at	4.38301	2.83437	2.83437	8.99231	8.34674	8.13498	8.68934	3.35058	8.54084	-5.19026	-12.5301	9.39548e-07	2.92291e-05	6.39996	gb:AW766332 /DB_XREF=gi:7698319 /DB_XREF=da61g11.x1 /CLONE=IMAGE:3199460 /TID=Xl.11101.1 /CNT=1 /FEA=EST /TIER=ConsEnd /STK=1 /UG=Xl.11101 /UG_TITLE=EST, Moderately similar to GEF2_HUMAN Ganglioside expression factor 2 (GEF-2) (General protein transport factor p16) (GATE-16) (H.sapiens)
Xl.19394.1.S1_at	4.41854	4.14419	4.14419	9.81575	9.34951	9.34909	9.15771	4.23564	9.41801	-5.18238	-22.8416	6.72419e-09	2.66301e-06	11.0479	gb:BQ385226 /DB_XREF=gi:21072913 /DB_XREF=NISC_mn11b04.x1 /CLONE=IMAGE:5072982 /TID=Xl.19394.1 /CNT=3 /FEA=EST /TIER=ConsEnd /STK=0 /UG=Xl.19394 /UG_TITLE=ESTs, Moderately similar to eukaryotic translation initiation factor 4E-like 3; eIF4E-like cap-binding protein (Homo sapiens) (H.sapiens)
Xl.8625.2.A1_at	4.33669	3.81197	3.81197	8.96995	8.74595	9.50836	9.34571	3.98688	9.14249	-5.15562	-19.568	2.43387e-08	4.2353e-06	9.92103	gb:CB563470 /DB_XREF=gi:29483000 /DB_XREF=AGENCOURT_13322830 /CLONE=IMAGE:6874994 /TID=Xl.8625.2 /CNT=10 /FEA=EST /TIER=Stack /STK=7 /UG=Xl.8625 /UG_TITLE=Xenopus laevis, Similar to lysophospholipase II, clone MGC:52664 IMAGE:4682380, mRNA, complete cds
Xl.5907.1.A1_at	2.74415	3.92206	3.92206	8.12704	8.40845	8.97702	9.19065	3.52942	8.67579	-5.14637	-13.4776	5.20834e-07	1.97955e-05	6.9933	gb:BJ090062 /DB_XREF=gi:17588104 /DB_XREF=BJ090062 /CLONE=XL101e08 /TID=Xl.5907.1 /CNT=14 /FEA=EST /TIER=Stack /STK=10 /UG=Xl.5907 /UG_TITLE=ESTs, Weakly similar to A38219 GAP-associated tyrosine phosphoprotein p62 - human (H.sapiens)
Xl.24180.1.A1_at	4.05551	5.10604	5.10604	9.70431	9.76011	10.4532	9.64101	4.75586	9.88967	-5.13381	-15.3254	1.82626e-07	1.11931e-05	8.02685	gb:BG552332 /DB_XREF=gi:13564112 /DB_XREF=df39b09.x1 /CLONE=IMAGE:3580745 /TID=Xl.24180.1 /CNT=8 /FEA=EST /TIER=ConsEnd /STK=1 /UG=Xl.24180 /UG_TITLE=ESTs, Moderately similar to COP9 subunit 6 (MOV34 homolog, 34 kD) (Homo sapiens) (H.sapiens)
Xl.2935.1.A1_at	5.52299	4.44402	4.44402	9.87574	10.1703	9.445	10.227	4.80368	9.92949	-5.12581	-15.3305	1.82134e-07	1.11931e-05	8.02948	gb:BE505257 /DB_XREF=gi:9708788 /DB_XREF=dc20c03.x1 /CLONE=IMAGE:3397636 /TID=Xl.2935.1 /CNT=4 /FEA=EST /TIER=ConsEnd /STK=2 /UG=Xl.2935 /UG_TITLE=ESTs
Xl.25863.1.A1_s_at	6.05438	4.90241	4.90241	10.8918	10.5892	10.227	9.8987	5.2864	10.4017	-5.11527	-14.1148	3.57731e-07	1.57679e-05	7.36698	gb:BG554560 /DB_XREF=gi:13566340 /DB_XREF=de96a11.x2 /CLONE=IMAGE:3549237 /TID=Xl.25863.1 /CNT=2 /FEA=EST /TIER=ConsEnd /STK=2 /UG=Xl.25863 /UG_TITLE=ESTs
Xl.5904.1.S1_x_at	3.06606	2.71799	2.71799	8.12076	6.98816	8.42228	8.22879	2.83401	7.94	-5.10598	-14.5072	2.86043e-07	1.44088e-05	7.5878	gb:BJ049960 /DB_XREF=gi:17380008 /DB_XREF=BJ049960 /CLONE=XL021m06 /TID=Xl.5904.1 /CNT=32 /FEA=EST /TIER=Stack /STK=10 /UG=Xl.5904 /UG_TITLE=ESTs, Moderately similar to clathrin, light polypeptide A, isoform a; clathrin light chain LCA; clathrin, light polypeptide (Lca) (Homo sapiens) (H.sapiens)
Xl.8319.1.S1_at	4.79737	4.39504	4.39504	9.74572	9.52216	10.1366	9.06541	4.52915	9.61746	-5.08831	-17.9245	5.03155e-08	6.32148e-06	9.25468	gb:BJ098891 /DB_XREF=gi:17600924 /DB_XREF=BJ098891 /CLONE=XL148f20 /TID=Xl.8319.1 /CNT=54 /FEA=mRNA /TIER=Stack /STK=17 /UG=Xl.8319 /UG_TITLE=Xenopus laevis clone S10-21-F5 mRNA sequence
Xl.4643.1.S1_at	2.77435	2.95372	2.95372	8.34065	7.47649	8.15767	7.95158	2.89393	7.9816	-5.08767	-20.4413	1.69399e-08	3.8911e-06	10.2458	gb:BJ091472 /DB_XREF=gi:17590135 /DB_XREF=BJ091472 /CLONE=XL097e05 /TID=Xl.4643.1 /CNT=26 /FEA=mRNA /TIER=ConsEnd /STK=5 /UG=Xl.4643 /UG_TITLE=Xenopus laevis, clone IMAGE:5571350, mRNA
Xl.23787.3.S1_at	7.02454	5.6256	5.6256	10.8331	10.7284	12.0929	10.9798	6.09192	11.1586	-5.06663	-11.2112	2.29331e-06	5.06513e-05	5.4894	gb:BG485934 /DB_XREF=gi:13433511 /DB_XREF=dab29a04.x1 /CLONE=IMAGE:4175527 /TID=Xl.23787.3 /CNT=2 /FEA=EST /TIER=ConsEnd /STK=1 /UG=Xl.23787 /UG_TITLE=ESTs, Moderately similar to AQHUP annexin V - human (H.sapiens)
Xl.14004.1.S1_at	5.07137	5.34518	5.34518	10.7262	10.1253	10.3882	10.0035	5.25391	10.3108	-5.05688	-21.2876	1.20907e-08	3.38687e-06	10.543	gb:BU907039 /DB_XREF=gi:24088953 /DB_XREF=AGENCOURT_10456249 /CLONE=IMAGE:6632131 /TID=Xl.14004.1 /CNT=5 /FEA=EST /TIER=ConsEnd /STK=1 /UG=Xl.14004 /UG_TITLE=ESTs, Highly similar to HSPC139 protein (Homo sapiens) (H.sapiens)
Xl.25423.1.A1_at	5.27726	4.2688	4.2688	9.11609	9.28547	10.1821	9.95522	4.60495	9.63473	-5.02978	-13.7789	4.35212e-07	1.78515e-05	7.17238	gb:BJ049203 /DB_XREF=gi:17374863 /DB_XREF=BJ049203 /CLONE=XL025f18 /TID=Xl.25423.1 /CNT=5 /FEA=EST /TIER=ConsEnd /STK=4 /UG=Xl.25423 /UG_TITLE=ESTs
Xl.15167.1.A1_at	4.98044	3.08994	3.08994	8.5363	8.84797	8.43132	9.18149	3.72011	8.74927	-5.02917	-10.7283	3.25528e-06	6.35832e-05	5.12823	gb:BJ049017 /DB_XREF=gi:17373185 /DB_XREF=BJ049017 /CLONE=XL022m13 /TID=Xl.15167.1 /CNT=3 /FEA=EST /TIER=ConsEnd /STK=3 /UG=Xl.15167 /UG_TITLE=ESTs
Xl.7081.1.S1_at	4.81576	4.29788	4.29788	9.75154	8.74905	9.63439	9.86216	4.47051	9.49928	-5.02878	-16.092	1.22359e-07	9.75899e-06	8.4139	gb:BJ077177 /DB_XREF=gi:17522093 /DB_XREF=BJ077177 /CLONE=XL060b18 /TID=Xl.7081.1 /CNT=40 /FEA=EST /TIER=Stack /STK=16 /UG=Xl.7081 /UG_TITLE=ESTs, Highly similar to protein phosphatase 4 (formerly X), catalytic subunit; Protein phosphatase 4, catalytic subunit (Homo sapiens) (H.sapiens)
Xl.7194.1.S1_at	2.91122	2.6472	2.6472	8.35015	7.90462	7.63108	6.95251	2.73521	7.70959	-4.97438	-15.2888	1.86237e-07	1.1306e-05	8.00781	gb:BM262174 /DB_XREF=gi:17925214 /DB_XREF=dag41g06.x3 /CLONE=IMAGE:4784074 /TID=Xl.7194.1 /CNT=8 /FEA=EST /TIER=ConsEnd /STK=3 /UG=Xl.7194 /UG_TITLE=ESTs
Xl.5149.2.S1_at	8.75281	8.87619	8.87619	13.4422	13.8068	14.0073	13.9534	8.83506	13.8024	-4.96737	-23.186	5.93521e-09	2.62486e-06	11.1532	gb:BI441703 /DB_XREF=gi:15266393 /DB_XREF=dai39a06.x1 /CLONE=IMAGE:4963882 /TID=Xl.5149.2 /CNT=41 /FEA=EST /TIER=Stack /STK=14 /UG=Xl.5149 /UG_TITLE=ESTs
Xl.26460.1.S1_at	3.86506	2.88419	2.88419	7.61171	8.22583	8.46927	8.36304	3.21115	8.16746	-4.95632	-15.1896	1.96438e-07	1.16766e-05	7.95589	gb:CD329801 /DB_XREF=gi:31094132 /DB_XREF=AGENCOURT_14164444 /CLONE=IMAGE:6951479 /TID=Xl.26460.1 /CNT=11 /FEA=EST /TIER=ConsEnd /STK=1 /UG=Xl.26460 /UG_TITLE=ESTs
Xl.11718.1.S1_at	4.1784	4.12425	4.12425	9.60922	8.48618	9.83318	8.44846	4.1423	9.09426	-4.95196	-13.1356	6.41569e-07	2.26025e-05	6.78449	gb:AW148044 /DB_XREF=gi:6195940 /DB_XREF=da03c09.x1 /CLONE=XENOPUS_SOURCE_ID:xlnoc001j17 /TID=Xl.11718.1 /CNT=2 /FEA=EST /TIER=ConsEnd /STK=1 /UG=Xl.11718 /UG_TITLE=ESTs, Weakly similar to ankyrin repeat, family A (RFXANK-like), 2 (Homo sapiens) (H.sapiens)
Xl.184.1.S1_at	5.28178	4.40966	4.40966	9.92512	9.38781	10.1243	9.17034	4.70037	9.65189	-4.95153	-15.0606	2.10641e-07	1.19175e-05	7.8878	gb:U78185.1 /DB_XREF=gi:2231330 /GEN=xMDC16 /TID=Xl.184.1 /CNT=1 /FEA=FLmRNA /TIER=FL /STK=1 /UG=Xl.184 /DEF=Xenopus laevis membrane anchored metalloprotease (xMDC16) mRNA, complete cds. /PROD=membrane anchored metalloprotease; disintegrin;cysteine-rich protein /FL=gb:U78185.1
Xl.3351.1.S1_at	4.67809	2.42344	2.42344	8.41975	7.7144	8.94538	7.36088	3.17499	8.1101	-4.93511	-8.11621	2.84821e-05	0.000258051	2.85704	gb:AF067969.1 /DB_XREF=gi:3764086 /TID=Xl.3351.1 /CNT=32 /FEA=FLmRNA /TIER=FL+Stack /STK=10 /UG=Xl.3351 /DEF=Xenopus laevis 13S condensin XCAP-D2 subunit mRNA, complete cds. /PROD=13S condensin XCAP-D2 subunit /FL=gb:AF067969.1 gb:AF072717.1
Xl.10032.1.A1_at	5.51879	4.82326	4.82326	9.91456	9.47717	10.6537	9.89887	5.05511	9.98608	-4.93097	-15.3273	1.82446e-07	1.11931e-05	8.02781	gb:BG016798 /DB_XREF=gi:12470398 /DB_XREF=df65f05.x1 /CLONE=IMAGE:3744153 /TID=Xl.10032.1 /CNT=3 /FEA=EST /TIER=ConsEnd /STK=2 /UG=Xl.10032 /UG_TITLE=ESTs, Moderately similar to P2CB_HUMAN Protein phosphatase 2C beta isoform (PP2C-beta) (H.sapiens)
Xl.3245.1.A1_at	2.34679	2.71799	2.71799	7.59582	7.62535	7.22394	7.6437	2.59426	7.5222	-4.92794	-22.8829	6.62355e-09	2.66301e-06	11.0606	gb:BJ088575 /DB_XREF=gi:17585904 /DB_XREF=BJ088575 /CLONE=XL093h03 /TID=Xl.3245.1 /CNT=5 /FEA=EST /TIER=ConsEnd /STK=3 /UG=Xl.3245 /UG_TITLE=ESTs, Moderately similar to SEP2_HUMAN Septin 2 (NEDD5 protein homolog) (H.sapiens)
Xl.23911.1.S1_at	4.03727	4.30715	4.30715	9.57728	9.46586	9.12106	8.39384	4.21719	9.13951	-4.92232	-16.0497	1.25034e-07	9.76883e-06	8.39312	gb:CB199700 /DB_XREF=gi:29149514 /DB_XREF=AGENCOURT_11247222 /CLONE=IMAGE:6874740 /TID=Xl.23911.1 /CNT=9 /FEA=EST /TIER=ConsEnd /STK=0 /UG=Xl.23911 /UG_TITLE=ESTs, Highly similar to LSM5_HUMAN U6 snRNA-associated Sm-like protein LSm5 (H.sapiens)
Xl.24279.1.S1_at	5.15661	4.71675	4.71675	9.33857	9.30559	10.519	9.96857	4.86337	9.78293	-4.91955	-14.8502	2.36331e-07	1.26245e-05	7.77527	gb:AF549993.1 /DB_XREF=gi:27228189 /TID=Xl.24279.1 /CNT=48 /FEA=mRNA /TIER=ConsEnd /STK=0 /UG=Xl.24279 /UG_TITLE=Xenopus laevis clone S10-51-F12 mRNA sequence /DEF=Xenopus laevis clone S10-51-F12 mRNA sequence.
Xl.19285.1.S1_at	3.40603	2.91671	2.91671	8.54984	7.72681	7.79651	7.92053	3.07982	7.99842	-4.9186	-18.3207	4.19951e-08	5.67428e-06	9.42238	gb:BQ384188 /DB_XREF=gi:21071875 /DB_XREF=NISC_mn05d01.x1 /CLONE=IMAGE:5049240 /TID=Xl.19285.1 /CNT=6 /FEA=EST /TIER=ConsEnd /STK=0 /UG=Xl.19285 /UG_TITLE=ESTs, Moderately similar to mitochondrial ribosomal protein L15 (Homo sapiens) (H.sapiens)
Xl.7050.1.S1_at	5.12186	4.67022	4.67022	9.85049	10.1653	8.55615	10.3441	4.82077	9.72903	-4.90826	-11.6908	1.6407e-06	4.22247e-05	5.83279	gb:BE189270 /DB_XREF=gi:9730699 /DB_XREF=db63e03.x1 /CLONE=IMAGE:3377692 /TID=Xl.7050.1 /CNT=4 /FEA=EST /TIER=ConsEnd /STK=1 /UG=Xl.7050 /UG_TITLE=ESTs, Moderately similar to down-regulated by Ctnnb1, a (Homo sapiens) (H.sapiens)
Xl.15723.1.S1_at	4.00456	3.97184	3.97184	9.4043	9.22947	9.31439	7.59828	3.98275	8.88661	-4.90386	-11.3857	2.02721e-06	4.7492e-05	5.6161	gb:BG162615 /DB_XREF=gi:12696534 /DB_XREF=df35b12.x1 /CLONE=IMAGE:3580367 /TID=Xl.15723.1 /CNT=15 /FEA=EST /TIER=ConsEnd /STK=1 /UG=Xl.15723 /UG_TITLE=ESTs, Moderately similar to A46711 probable thioredoxin peroxidase (EC 1.11.1.-) PAGA - human (H.sapiens)
Xl.7820.1.S1_x_at	5.6331	2.34679	2.34679	8.78344	7.49546	8.45894	8.60952	3.44223	8.33684	-4.89461	-6.33457	0.000176878	0.000851757	0.916619	gb:BC045260.1 /DB_XREF=gi:28374303 /TID=Xl.7820.1 /CNT=75 /FEA=FLmRNA /TIER=FL+Stack /STK=9 /UG=Xl.7820 /DEF=Xenopus laevis, similar to heterogeneous ribonuclear particle protein, clone MGC:52620 IMAGE:4681284, mRNA, complete cds. /PROD=similar to heterogeneous ribonuclear particleprotein /FL=gb:BC045260.1
Xl.21042.1.S1_at	6.13576	5.43962	5.43962	10.9411	9.99015	10.3655	10.9256	5.67166	10.5556	-4.8839	-15.5777	1.59747e-07	1.08042e-05	8.15673	gb:AW782634 /DB_XREF=gi:7797240 /DB_XREF=da96e01.x1 /TID=Xl.21042.1 /CNT=7 /FEA=EST /TIER=ConsEnd /STK=3 /UG=Xl.21042 /UG_TITLE=ESTs, Weakly similar to NADH dehydrogenase (ubiquinone) 1 beta subcomplex, 10 (22kD, PDSW) (Homo sapiens) (H.sapiens)
Xl.8364.3.A1_at	4.31159	2.86681	2.86681	8.18831	7.75264	9.02785	7.84823	3.3484	8.20426	-4.85585	-10.9306	2.80628e-06	5.83879e-05	5.28149	gb:BG579928 /DB_XREF=gi:13594992 /DB_XREF=dab79d10.x1 /CLONE=IMAGE:4203307 /TID=Xl.8364.3 /CNT=10 /FEA=EST /TIER=Stack /STK=9 /UG=Xl.8364 /UG_TITLE=Xenopus laevis methyl-CpG binding protein MBD3 (MBD3) mRNA, complete cds
Xl.2756.1.A1_at	5.73195	4.02988	4.02988	9.38019	9.18234	9.4783	9.76909	4.59724	9.45248	-4.85524	-11.5298	1.83329e-06	4.47987e-05	5.71919	gb:BQ398641 /DB_XREF=gi:21086328 /DB_XREF=NISC_mo09e07.x1 /CLONE=IMAGE:5278932 /TID=Xl.2756.1 /CNT=7 /FEA=EST /TIER=ConsEnd /STK=5 /UG=Xl.2756 /UG_TITLE=ESTs
Xl.24022.1.S1_at	3.26331	4.15102	4.15102	8.76561	8.89837	8.3444	8.80923	3.85512	8.7044	-4.84929	-17.085	7.47505e-08	7.85214e-06	8.8834	gb:BJ048017 /DB_XREF=gi:17406074 /DB_XREF=BJ048017 /CLONE=XL018g23 /TID=Xl.24022.1 /CNT=4 /FEA=EST /TIER=ConsEnd /STK=2 /UG=Xl.24022 /UG_TITLE=ESTs, Highly similar to S28976 DNA-directed RNA polymerase (EC 2.7.7.6) II largest chain - human (H.sapiens)
Xl.6186.3.S1_at	5.60271	3.84873	3.84873	8.87748	8.82858	9.64245	9.77249	4.43339	9.28025	-4.84686	-10.2355	4.72204e-06	8.13083e-05	4.7427	gb:BG016624 /DB_XREF=gi:12470058 /DB_XREF=df63a05.x1 /CLONE=IMAGE:3743889 /TID=Xl.6186.3 /CNT=18 /FEA=EST /TIER=Stack /STK=12 /UG=Xl.6186 /UG_TITLE=Xenopus laevis NO27 mRNA, complete cds
Xl.23448.1.S1_at	3.60672	4.44402	4.44402	8.89553	9.18468	8.81683	9.11387	4.16492	9.00273	-4.83781	-18.2429	4.34997e-08	5.74245e-06	9.38982	gb:BC041216.1 /DB_XREF=gi:27371254 /TID=Xl.23448.1 /CNT=51 /FEA=FLmRNA /TIER=FL+Stack /STK=10 /UG=Xl.23448 /DEF=Xenopus laevis, Similar to SWISNF related, matrix associated, actin dependent regulator of chromatin, subfamily e, member 1, clone MGC:52696 IMAGE:4682679, mRNA, complete cds. /PROD=Similar to SWISNF related, matrix associated,actin dependent regulator of chromatin, subfamily e,member 1…
Xl.7540.1.S1_at	3.86506	4.04159	4.04159	9.57553	8.95605	8.67613	8.0502	3.98275	8.81448	-4.83173	-14.1777	3.44994e-07	1.55384e-05	7.40287	gb:CA988007 /DB_XREF=gi:27520682 /DB_XREF=AGENCOURT_11303767 /CLONE=IMAGE:6864742 /TID=Xl.7540.1 /CNT=23 /FEA=EST /TIER=ConsEnd /STK=0 /UG=Xl.7540 /UG_TITLE=ESTs, Moderately similar to DENR_HUMAN Density-regulated protein (DRP) (DRP1 protein) (Smooth muscle cell associated protein-3) (SMAP-3) (H.sapiens)
Xl.3149.1.S1_at	3.15648	2.56059	2.56059	7.55913	6.92515	7.89556	7.97183	2.75922	7.58792	-4.8287	-15.6541	1.53465e-07	1.06972e-05	8.19556	gb:AW147877 /DB_XREF=gi:6195773 /DB_XREF=da23a05.x1 /CLONE=XENOPUS_SOURCE_ID:xlnga003i09 /TID=Xl.3149.1 /CNT=11 /FEA=EST /TIER=Stack /STK=8 /UG=Xl.3149 /UG_TITLE=ESTs, Weakly similar to L10K_HUMAN Leydig cell tumor 10 kDa protein homolog (HSPC023) (H.sapiens)
Xl.7980.1.A1_at	4.31159	5.58369	5.58369	9.76649	9.80338	9.63597	10.7284	5.15966	9.98355	-4.82389	-12.1259	1.22356e-06	3.49566e-05	6.13199	gb:BJ100444 /DB_XREF=gi:17603193 /DB_XREF=BJ100444 /CLONE=XL152m02 /TID=Xl.7980.1 /CNT=13 /FEA=EST /TIER=ConsEnd /STK=2 /UG=Xl.7980 /UG_TITLE=ESTs, Moderately similar to YA09_HUMAN Hypothetical protein CGI-109 precursor (H.sapiens)
Xl.6001.1.S1_at	3.92754	3.63992	3.63992	8.609	8.1643	8.74279	8.68237	3.7358	8.54961	-4.81382	-21.559	1.08811e-08	3.12424e-06	10.6348	gb:CB563758 /DB_XREF=gi:29483288 /DB_XREF=AGENCOURT_13321552 /CLONE=IMAGE:6876613 /TID=Xl.6001.1 /CNT=40 /FEA=mRNA /TIER=Stack /STK=7 /UG=Xl.6001 /UG_TITLE=Xenopus laevis, Similar to RIKEN cDNA 0610011D08 gene, clone IMAGE:4684066, mRNA, partial cds
Xl.256.1.S1_at	7.15432	7.30228	7.30228	12.1468	12.0637	11.8404	12.2161	7.25296	12.0667	-4.81378	-24.5959	3.62622e-09	2.17453e-06	11.5614	gb:AF046043.1 /DB_XREF=gi:2896106 /GEN=VLG1 /TID=Xl.256.1 /CNT=21 /FEA=FLmRNA /TIER=FL+Stack /STK=6 /UG=Xl.256 /DEF=Xenopus laevis DEAD box protein (VLG1) mRNA, complete cds. /PROD=DEAD box protein /FL=gb:AF046043.1
Xl.1014.1.S1_at	3.76894	3.68203	3.68203	8.19058	8.73018	8.19058	8.97737	3.711	8.52218	-4.81117	-18.934	3.19784e-08	5.03099e-06	9.67291	gb:U46131.1 /DB_XREF=gi:1184106 /GEN=X.MCM4 /TID=Xl.1014.1 /CNT=10 /FEA=FLmRNA /TIER=FL /STK=1 /UG=Xl.1014 /DEF=Xenopus laevis DNA replication initiator protein (X.MCM4) mRNA, complete cds. /PROD=DNA replication initiator protein /FL=gb:U29178.1 gb:U46131.1
Xl.14775.1.A1_at	3.28411	3.46815	3.46815	8.09264	8.54923	8.27028	7.92879	3.4068	8.21024	-4.80344	-21.9406	9.40252e-09	3.12424e-06	10.7613	gb:BM179359 /DB_XREF=gi:17403430 /DB_XREF=dai42f06.x1 /CLONE=IMAGE:4964483 /TID=Xl.14775.1 /CNT=4 /FEA=EST /TIER=ConsEnd /STK=2 /UG=Xl.14775 /UG_TITLE=ESTs, Weakly similar to POL2_MOUSE Retrovirus-related POL polyprotein (Contains: Reverse transcriptase ; Endonuclease) (M.musculus)
Xl.3401.2.A2_at	4.18219	4.44402	4.44402	8.50997	8.7572	10.0509	9.29723	4.35674	9.15384	-4.79709	-13.2391	6.02021e-07	2.16747e-05	6.84832	gb:BG016692 /DB_XREF=gi:12470191 /DB_XREF=df63h09.x1 /CLONE=IMAGE:3744233 /TID=Xl.3401.2 /CNT=37 /FEA=EST /TIER=Stack /STK=11 /UG=Xl.3401 /UG_TITLE=ESTs, Weakly similar to hypothetical protein DKFZp586F1122 similar to axotrophin; likely ortholog of mouse axotrophin (Homo sapiens) (H.sapiens)
Xl.702.1.S1_at	5.07137	5.20511	5.20511	10.1	9.85328	9.4091	10.4552	5.16053	9.95439	-4.79387	-17.7952	5.3416e-08	6.45771e-06	9.19894	gb:J03167.1 /DB_XREF=gi:214094 /TID=Xl.702.1 /CNT=35 /FEA=FLmRNA /TIER=FL+Stack /STK=7 /UG=Xl.702 /UG_TITLE=X.laevis cyclin B2 mRNA, complete cds /DEF=X.laevis cyclin B2 mRNA, complete cds. /FL=gb:J03167.1
Xl.8728.1.S1_at	5.2895	3.43139	3.43139	8.77557	8.86144	9.08367	8.63866	4.05076	8.83984	-4.78907	-10.7701	3.15614e-06	6.23894e-05	5.16019	gb:BC045232.1 /DB_XREF=gi:28175658 /TID=Xl.8728.1 /CNT=22 /FEA=FLmRNA /TIER=FL+Stack /STK=6 /UG=Xl.8728 /DEF=Xenopus laevis, Similar to RIKEN cDNA 0710008A13 gene, clone MGC:53214 IMAGE:5543299, mRNA, complete cds. /PROD=Similar to RIKEN cDNA 0710008A13 gene /FL=gb:BC045232.1
Xl.22164.1.A1_at	4.44875	4.30639	4.30639	8.98041	9.07428	9.26191	9.22171	4.35384	9.13458	-4.78073	-25.1112	3.04945e-09	2.06017e-06	11.702	gb:BJ084562 /DB_XREF=gi:17580159 /DB_XREF=BJ084562 /CLONE=XL089k16 /TID=Xl.22164.1 /CNT=7 /FEA=EST /TIER=ConsEnd /STK=5 /UG=Xl.22164 /UG_TITLE=ESTs, Moderately similar to N-acylsphingosine amidohydrolase (acid ceramidase) (Homo sapiens) (H.sapiens)
Xl.24971.1.S1_at	4.18219	4.78156	4.78156	9.89838	9.97496	8.88955	8.68638	4.58177	9.36231	-4.78054	-12.7347	8.24416e-07	2.66238e-05	6.53207	gb:BU901854 /DB_XREF=gi:24083767 /DB_XREF=AGENCOURT_10180861 /CLONE=IMAGE:6318882 /TID=Xl.24971.1 /CNT=2 /FEA=EST /TIER=ConsEnd /STK=1 /UG=Xl.24971 /UG_TITLE=ESTs
Xl.11551.1.A1_at	5.99108	4.83144	4.83144	9.96717	10.366	9.41554	10.2215	5.21799	9.99256	-4.77458	-13.25	5.98008e-07	2.15979e-05	6.85502	gb:BJ099628 /DB_XREF=gi:17602010 /DB_XREF=BJ099628 /CLONE=XL151g04 /TID=Xl.11551.1 /CNT=3 /FEA=EST /TIER=ConsEnd /STK=2 /UG=Xl.11551 /UG_TITLE=ESTs, Moderately similar to golgi phosphoprotein 3 (coat-protein); Golgi protein; golgi phosphoprotein 3 (Homo sapiens) (H.sapiens)
Xl.24554.1.S1_at	3.73348	5.10604	5.10604	8.04264	10.3928	9.52402	9.72662	4.64852	9.42152	-4.773	-8.41499	2.16287e-05	0.000217328	3.14788	gb:BE189423 /DB_XREF=gi:9730814 /DB_XREF=db65d11.x1 /CLONE=IMAGE:3377877 /TID=Xl.24554.1 /CNT=20 /FEA=EST /TIER=ConsEnd /STK=3 /UG=Xl.24554 /UG_TITLE=ESTs
Xl.4504.1.A1_at	4.31159	3.15648	3.15648	8.38583	7.67106	9.03827	8.10003	3.54151	8.2988	-4.75728	-11.8467	1.47536e-06	3.87745e-05	5.94131	gb:BJ076394 /DB_XREF=gi:17521310 /DB_XREF=BJ076394 /CLONE=XL080j09 /TID=Xl.4504.1 /CNT=17 /FEA=EST /TIER=Stack /STK=10 /UG=Xl.4504 /UG_TITLE=ESTs, Weakly similar to ACRC protein; putative nuclear protein (Homo sapiens) (H.sapiens)
Xl.4192.2.S1_a_at	6.65705	7.22049	7.22049	11.5391	11.7434	12.015	11.8459	7.03268	11.7858	-4.75317	-20.347	1.76031e-08	3.92716e-06	10.2116	gb:BJ083646 /DB_XREF=gi:17578810 /DB_XREF=BJ083646 /CLONE=XL085m18 /TID=Xl.4192.2 /CNT=11 /FEA=EST /TIER=ConsEnd /STK=1 /UG=Xl.4192 /UG_TITLE=ESTs, Moderately similar to ELK4 protein, isoform b; ETS-domain protein; SRF accessory protein 1 (Homo sapiens) (H.sapiens)
Xl.4310.1.S1_at	6.62663	5.6256	5.6256	10.5859	10.8896	10.9634	10.404	5.95928	10.7107	-4.75145	-15.6631	1.52745e-07	1.06972e-05	8.20011	gb:AW158183 /DB_XREF=gi:6270212 /DB_XREF=za36c02.x1 /CLONE=za36c02 /TID=Xl.4310.1 /CNT=33 /FEA=EST /TIER=ConsEnd /STK=0 /UG=Xl.4310 /UG_TITLE=ESTs, Moderately similar to T46366 hypothetical protein DKFZp434C0118.1 - human (fragment) (H.sapiens)
Xl.17345.1.A1_at	2.72243	4.24835	4.24835	8.50225	8.55141	7.92307	8.91859	3.73971	8.47383	-4.73412	-11.3536	2.07349e-06	4.7628e-05	5.59293	gb:BJ053357 /DB_XREF=gi:17498953 /DB_XREF=BJ053357 /CLONE=XL038i21 /TID=Xl.17345.1 /CNT=17 /FEA=EST /TIER=Stack /STK=6 /UG=Xl.17345 /UG_TITLE=ESTs, Weakly similar to MIC2_HUMAN T-cell surface glycoprotein E2 precursor (E2 antigen) (CD99) (MIC2 protein) (12E7) (H.sapiens)
Xl.23830.2.A1_at	3.66939	2.6826	2.6826	8.09277	7.41861	7.95284	7.50996	3.01153	7.74354	-4.73202	-15.0373	2.13328e-07	1.19516e-05	7.87542	gb:BJ090354 /DB_XREF=gi:17588524 /DB_XREF=BJ090354 /CLONE=XL107j24 /TID=Xl.23830.2 /CNT=6 /FEA=EST /TIER=ConsEnd /STK=2 /UG=Xl.23830 /UG_TITLE=ESTs, Highly similar to 2111281A 26S protease:SUBUNIT=12 (Homo sapiens) (H.sapiens)
Xl.4485.1.A1_at	4.67809	2.99959	2.99959	8.34566	7.98165	8.23119	8.59898	3.55909	8.28937	-4.73028	-11.3106	2.1373e-06	4.82258e-05	5.5618	gb:BJ086577 /DB_XREF=gi:17583042 /DB_XREF=BJ086577 /CLONE=XL053h21 /TID=Xl.4485.1 /CNT=6 /FEA=EST /TIER=ConsEnd /STK=4 /UG=Xl.4485 /UG_TITLE=ESTs
Xl.8880.2.A1_at	3.28245	3.7754	3.7754	8.49976	7.36526	8.95903	8.49423	3.61108	8.32957	-4.71849	-12.6892	8.48599e-07	2.69977e-05	6.50288	gb:BG346670 /DB_XREF=gi:13167094 /DB_XREF=daa39g05.x1 /CLONE=IMAGE:4058696 /TID=Xl.8880.2 /CNT=8 /FEA=EST /TIER=Stack /STK=7 /UG=Xl.8880 /UG_TITLE=Xenopus laevis, Similar to ATPase, H+ transporting, lysosomal (vacuolar proton pump), beta 5658 kDa, isoform 2, clone MGC:53822 IMAGE:5542270, mRNA, complete cds
Xl.8388.1.S1_at	4.4791	4.48895	4.48895	9.5961	9.38532	8.95793	8.78727	4.48567	9.18165	-4.69599	-19.065	3.02031e-08	4.95092e-06	9.72506	gb:BC042931.1 /DB_XREF=gi:27781305 /TID=Xl.8388.1 /CNT=29 /FEA=FLmRNA /TIER=FL+Stack /STK=10 /UG=Xl.8388 /DEF=Xenopus laevis, similar to Ubiquinol-cytochrome C reductase complex, clone MGC:53943 IMAGE:5570350, mRNA, complete cds. /PROD=similar to Ubiquinol-cytochrome C reductasecomplex /FL=gb:BC042931.1
Xl.16865.1.A1_at	6.36552	4.67022	4.67022	10.1114	9.7511	10.3248	9.48602	5.23532	9.91832	-4.683	-10.6681	3.40381e-06	6.53725e-05	5.08209	gb:BG408057 /DB_XREF=gi:13314406 /DB_XREF=dd18d01.x1 /CLONE=IMAGE:3420720 /TID=Xl.16865.1 /CNT=2 /FEA=EST /TIER=ConsEnd /STK=1 /UG=Xl.16865 /UG_TITLE=ESTs, Moderately similar to hypothetical protein FLJ21156 (Homo sapiens) (H.sapiens)
Xl.24462.1.S1_a_at	2.71064	3.15648	3.15648	7.43921	8.04989	7.56099	7.6996	3.00787	7.68742	-4.67956	-19.8919	2.12403e-08	4.20594e-06	10.0437	gb:AW158782 /DB_XREF=gi:6270748 /DB_XREF=za44e12.x1 /CLONE=za44e12 /TID=Xl.24462.1 /CNT=17 /FEA=EST /TIER=ConsEnd /STK=0 /UG=Xl.24462 /UG_TITLE=ESTs, Weakly similar to COQ6_HUMAN Putative ubiquinone biosynthesis monooxgenase COQ6 (CGI-10) (H.sapiens)
Xl.18661.1.A1_at	3.56796	3.8785	3.8785	8.93786	8.58716	7.99227	8.2897	3.77498	8.45175	-4.67676	-17.658	5.69412e-08	6.59371e-06	9.13924	gb:BG552522 /DB_XREF=gi:13564302 /DB_XREF=df42g10.x1 /CLONE=IMAGE:3581370 /TID=Xl.18661.1 /CNT=2 /FEA=EST /TIER=ConsEnd /STK=2 /UG=Xl.18661 /UG_TITLE=ESTs
Xl.11082.1.A1_x_at	4.44875	3.51528	3.51528	8.62605	8.99397	8.51933	7.8215	3.82643	8.49021	-4.66378	-13.3791	5.5281e-07	2.0519e-05	6.93373	gb:BJ046617 /DB_XREF=gi:17405864 /DB_XREF=BJ046617 /CLONE=XL007o24 /TID=Xl.11082.1 /CNT=4 /FEA=EST /TIER=ConsEnd /STK=2 /UG=Xl.11082 /UG_TITLE=ESTs, Weakly similar to A39242 DNA topoisomerase (ATP-hydrolyzing) (EC 5.99.1.3) beta, splice form 2 - human (H.sapiens)
Xl.12400.1.A1_at	4.83305	4.60786	4.60786	9.95771	9.1498	8.94818	9.31212	4.68293	9.34195	-4.65903	-17.1778	7.14872e-08	7.81934e-06	8.92554	gb:BJ085985 /DB_XREF=gi:17582210 /DB_XREF=BJ085985 /CLONE=XL051k17 /TID=Xl.12400.1 /CNT=2 /FEA=EST /TIER=ConsEnd /STK=2 /UG=Xl.12400 /UG_TITLE=ESTs, Moderately similar to A Chain A, Crystal Structure Of Human Protein Farnesyltransferase Complexed With Farnesyl Diphosphate And The Peptidomimetic Inhibitor L-739,750 (H.sapiens)
Xl.8757.2.A1_at	6.23929	6.7463	6.7463	12.0322	11.5391	10.2483	11.1086	6.5773	11.232	-4.65475	-11.563	1.79162e-06	4.42511e-05	5.74274	gb:BJ088225 /DB_XREF=gi:17585407 /DB_XREF=BJ088225 /CLONE=XL092e02 /TID=Xl.8757.2 /CNT=8 /FEA=EST /TIER=Stack /STK=6 /UG=Xl.8757 /UG_TITLE=Xenopus laevis, Similar to KIAA0107 gene product, clone MGC:53209 IMAGE:5543277, mRNA, complete cds
Xl.5044.1.A1_at	2.95372	3.92206	3.92206	8.58343	8.08455	7.81346	8.45864	3.59928	8.23502	-4.63574	-14.6208	2.68391e-07	1.3761e-05	7.65046	gb:BJ054044 /DB_XREF=gi:17499050 /DB_XREF=BJ054044 /CLONE=XL049b11 /TID=Xl.5044.1 /CNT=7 /FEA=EST /TIER=Stack /STK=7 /UG=Xl.5044 /UG_TITLE=ESTs, Moderately similar to suppressor of Ty 5 homolog (S. cerevisiae); suppressor of Ty (S.cerevisiae) 5 homolog (Homo sapiens) (H.sapiens)
Xl.1523.1.A1_at	5.03721	4.76183	4.76183	9.75274	9.46455	9.12532	9.58006	4.85362	9.48067	-4.62704	-20.7383	1.50267e-08	3.75178e-06	10.3519	gb:BJ081294 /DB_XREF=gi:17575399 /DB_XREF=BJ081294 /CLONE=XL071d06 /TID=Xl.1523.1 /CNT=5 /FEA=EST /TIER=ConsEnd /STK=3 /UG=Xl.1523 /UG_TITLE=ESTs, Weakly similar to Y250_HUMAN Hypothetical protein KIAA0250 (H.sapiens)
Xl.23834.1.A1_at	2.5212	2.99959	2.99959	6.24744	7.63284	8.50703	7.44797	2.84013	7.45882	-4.6187	-9.8165	6.55952e-06	9.95393e-05	4.40047	gb:BG161462 /DB_XREF=gi:12695381 /DB_XREF=dab70e03.x1 /CLONE=IMAGE:4202572 /TID=Xl.23834.1 /CNT=7 /FEA=EST /TIER=ConsEnd /STK=2 /UG=Xl.23834 /UG_TITLE=ESTs
Xl.5852.1.A1_at	2.46551	2.7814	2.7814	7.54651	7.19287	7.74469	6.67591	2.6761	7.29	-4.61389	-16.1299	1.20018e-07	9.75899e-06	8.43245	gb:BJ055389 /DB_XREF=gi:17423373 /DB_XREF=BJ055389 /CLONE=XL009g17 /TID=Xl.5852.1 /CNT=16 /FEA=EST /TIER=Stack /STK=14 /UG=Xl.5852 /UG_TITLE=ESTs, Weakly similar to hypothetical protein FLJ13390 similar to PAF53 (Homo sapiens) (H.sapiens)
Xl.725.1.S2_at	7.43255	6.49324	6.49324	11.054	11.6192	11.0215	11.9859	6.80635	11.4202	-4.61383	-13.4682	5.23796e-07	1.97955e-05	6.98764	gb:BM262179 /DB_XREF=gi:17925219 /DB_XREF=dag41h01.x3 /CLONE=IMAGE:4784112 /TID=Xl.725.1 /CNT=46 /FEA=FLmRNA /TIER=ConsEnd /STK=4 /UG=Xl.725 /UG_TITLE=Xenopus laevis cytochrome P450 steroid 17-alpha-hydroxylase17,20 lyase (CYP17) mRNA, complete cds /FL=gb:AF325435.1
Xl.3357.1.A1_at	6.34909	6.07208	6.07208	11.0466	11.0732	11.0466	9.93522	6.16442	10.7754	-4.61095	-14.5631	2.77199e-07	1.41495e-05	7.61871	gb:BF231953 /DB_XREF=gi:11174102 /DB_XREF=df10e11.x1 /CLONE=IMAGE:3557084 /TID=Xl.3357.1 /CNT=3 /FEA=EST /TIER=ConsEnd /STK=3 /UG=Xl.3357 /UG_TITLE=ESTs, Weakly similar to A39216 plasma cell membrane glycoprotein PC-1 - human (H.sapiens)
Xl.19352.1.S1_at	3.40603	2.53723	2.53723	7.66087	8.1386	7.07321	6.83536	2.82683	7.42701	-4.60018	-12.3855	1.03171e-06	3.18526e-05	6.30518	gb:BJ082740 /DB_XREF=gi:17577489 /DB_XREF=BJ082740 /CLONE=XL082i01 /TID=Xl.19352.1 /CNT=9 /FEA=EST /TIER=ConsEnd /STK=1 /UG=Xl.19352 /UG_TITLE=ESTs
Xl.23817.1.S1_at	5.16792	2.60002	2.60002	7.82797	8.04451	8.92061	7.42292	3.45598	8.054	-4.59802	-7.11409	7.62994e-05	0.000484475	1.81179	gb:BJ092570 /DB_XREF=gi:17591743 /DB_XREF=BJ092570 /CLONE=XL087l15 /TID=Xl.23817.1 /CNT=18 /FEA=EST /TIER=ConsEnd /STK=3 /UG=Xl.23817 /UG_TITLE=ESTs, Moderately similar to ACDM_HUMAN Acyl-CoA dehydrogenase, medium-chain specific, mitochondrial precursor (MCAD) (H.sapiens)
Xl.2618.2.A1_at	4.37713	3.27896	3.27896	8.44288	8.30922	8.1016	8.1016	3.64502	8.23883	-4.59381	-15.0606	2.10645e-07	1.19175e-05	7.88779	gb:BQ383424 /DB_XREF=gi:21071111 /DB_XREF=NISC_mn01a11.x1 /CLONE=IMAGE:5048732 /TID=Xl.2618.2 /CNT=6 /FEA=EST /TIER=ConsEnd /STK=1 /UG=Xl.2618 /UG_TITLE=ESTs, Moderately similar to BTB (POZ) domain containing 2; BTB (POZ) domain containing 2; hypothetical protein FLJ20386 (Homo sapiens) (H.sapiens)
Xl.25940.1.S1_at	3.77772	3.64315	3.64315	8.06199	8.33745	8.30361	8.41243	3.68801	8.27887	-4.59086	-23.7491	4.85847e-09	2.53634e-06	11.3205	gb:CB564763 /DB_XREF=gi:29484293 /DB_XREF=AGENCOURT_13324721 /CLONE=IMAGE:6875788 /TID=Xl.25940.1 /CNT=30 /FEA=EST /TIER=Stack /STK=6 /UG=Xl.25940 /UG_TITLE=ESTs, Moderately similar to A Chain A, Structure Of Human Adenosine Kinase At 1.50 Angstroms (H.sapiens)
Xl.6893.1.S1_at	5.82839	5.65001	5.65001	11.3065	9.76649	10.2546	9.80244	5.70947	10.2825	-4.57303	-12.228	1.14377e-06	3.31721e-05	6.20054	gb:BE678026 /DB_XREF=gi:10059147 /DB_XREF=df80a10.x1 /CLONE=IMAGE:3745626 /TID=Xl.6893.1 /CNT=7 /FEA=EST /TIER=ConsEnd /STK=1 /UG=Xl.6893 /UG_TITLE=ESTs, Weakly similar to ActA binding protein 3 (Mus musculus) (M.musculus)
Xl.23993.1.A1_at	7.03432	5.20511	5.20511	9.99771	10.2828	10.4808	10.7868	5.81484	10.387	-4.57217	-10.0145	5.60761e-06	9.03273e-05	4.5639	gb:CD360758 /DB_XREF=gi:31132169 /DB_XREF=AGENCOURT_14235436 /CLONE=IMAGE:6957104 /TID=Xl.23993.1 /CNT=13 /FEA=EST /TIER=Stack /STK=7 /UG=Xl.23993 /UG_TITLE=ESTs
Xl.8785.1.S1_at	3.01303	3.67405	3.67405	7.18764	8.74178	8.23345	7.93593	3.45371	8.0247	-4.57099	-12.2515	1.1262e-06	3.29878e-05	6.21626	gb:BJ082816 /DB_XREF=gi:17577599 /DB_XREF=BJ082816 /CLONE=XL083c04 /TID=Xl.8785.1 /CNT=22 /FEA=EST /TIER=Stack /STK=7 /UG=Xl.8785 /UG_TITLE=ESTs, Weakly similar to A40402 CD9 antigen - human (H.sapiens)
Xl.25758.1.S1_at	3.78242	5.16505	5.16505	9.86908	8.82366	9.03827	9.35895	4.70418	9.27249	-4.56831	-11.3358	2.09962e-06	4.78754e-05	5.58007	gb:CD325687 /DB_XREF=gi:31090018 /DB_XREF=AGENCOURT_14142219 /CLONE=IMAGE:6948901 /TID=Xl.25758.1 /CNT=103 /FEA=EST /TIER=Stack /STK=11 /UG=Xl.25758 /UG_TITLE=ESTs, Moderately similar to Human Translation Initiation Factor Eif1, Nmr, 29 Structures (H.sapiens)
Xl.7749.1.A1_at	3.47613	3.10219	3.10219	7.93386	7.82373	7.61329	7.80859	3.22684	7.79487	-4.56803	-22.3196	8.15287e-09	2.94967e-06	10.8838	gb:BG371367 /DB_XREF=gi:13267904 /DB_XREF=dac44g08.x1 /CLONE=IMAGE:4433079 /TID=Xl.7749.1 /CNT=3 /FEA=EST /TIER=ConsEnd /STK=2 /UG=Xl.7749 /UG_TITLE=ESTs
Xl.21957.1.S1_at	2.5212	2.63342	2.63342	7.10053	7.51553	7.07935	6.95484	2.59601	7.16256	-4.56655	-21.6059	1.06865e-08	3.12424e-06	10.6505	gb:BC043625.1 /DB_XREF=gi:27694703 /TID=Xl.21957.1 /CNT=5 /FEA=FLmRNA /TIER=FL /STK=2 /UG=Xl.21957 /DEF=Xenopus laevis, Similar to RIKEN cDNA 5730528L13 gene, clone MGC:53031 IMAGE:5537295, mRNA, complete cds. /PROD=Similar to RIKEN cDNA 5730528L13 gene /FL=gb:BC043625.1
Xl.14395.1.S1_at	3.92754	4.44402	4.44402	9.16234	8.24769	8.60291	9.33649	4.27186	8.83736	-4.5655	-14.7136	2.5487e-07	1.32451e-05	7.70123	gb:CD301203 /DB_XREF=gi:31080998 /DB_XREF=AGENCOURT_14233193 /CLONE=IMAGE:6958407 /TID=Xl.14395.1 /CNT=6 /FEA=EST /TIER=ConsEnd /STK=0 /UG=Xl.14395 /UG_TITLE=ESTs, Moderately similar to tumor susceptibility gene 101 (Homo sapiens) (H.sapiens)
Xl.15831.1.A1_at	3.15648	6.7463	6.7463	10.2429	10.0641	10.8056	9.33821	5.5497	10.1127	-4.56298	-5.45355	0.000500519	0.00177751	-0.191992	gb:BJ050153 /DB_XREF=gi:17388569 /DB_XREF=BJ050153 /CLONE=XL023g16 /TID=Xl.15831.1 /CNT=4 /FEA=EST /TIER=ConsEnd /STK=1 /UG=Xl.15831 /UG_TITLE=ESTs
Xl.13116.1.A1_at	3.06606	2.86681	2.86681	7.72408	6.79306	7.24719	8.21338	2.93323	7.49443	-4.5612	-13.6885	4.5912e-07	1.85017e-05	7.11914	gb:BJ092744 /DB_XREF=gi:17591998 /DB_XREF=BJ092744 /CLONE=XL057e08 /TID=Xl.13116.1 /CNT=4 /FEA=EST /TIER=ConsEnd /STK=2 /UG=Xl.13116 /UG_TITLE=ESTs, Weakly similar to hypothetical protein FLJ10483 (Homo sapiens) (H.sapiens)
Xl.8235.2.A1_x_at	4.08783	4.67928	4.67928	9.6364	9.15996	8.42665	8.94291	4.48213	9.04148	-4.55935	-14.4193	3.00584e-07	1.45051e-05	7.53895	gb:BJ083478 /DB_XREF=gi:17578565 /DB_XREF=BJ083478 /CLONE=XL085e18 /TID=Xl.8235.2 /CNT=2 /FEA=EST /TIER=ConsEnd /STK=2 /UG=Xl.8235 /UG_TITLE=ESTs, Weakly similar to eukaryotic translation elongation factor 1 beta 2; eukaryotic translation elongation factor 1 beta 1 (Homo sapiens) (H.sapiens)
Xl.13321.1.S1_at	4.51628	5.54998	5.54998	10.1418	10.0028	8.78223	10.114	5.20541	9.76021	-4.5548	-11.06	2.55532e-06	5.455e-05	5.37806	gb:BC044094.1 /DB_XREF=gi:28422353 /TID=Xl.13321.1 /CNT=46 /FEA=FLmRNA /TIER=FL+Stack /STK=11 /UG=Xl.13321 /DEF=Xenopus laevis, Similar to N-acetyltransferase ARD1 homolog (S. cerevisiae), clone MGC:52756 IMAGE:4684097, mRNA, complete cds. /PROD=Similar to N-acetyltransferase ARD1 homolog (S.cerevisiae) /FL=gb:BC044094.1
Xl.21915.1.S1_at	2.72619	2.7814	2.7814	7.52586	7.74642	6.22699	7.74901	2.763	7.31207	-4.54907	-12.053	1.28437e-06	3.57687e-05	6.08263	gb:BC043845.1 /DB_XREF=gi:27694898 /TID=Xl.21915.1 /CNT=8 /FEA=FLmRNA /TIER=FL /STK=1 /UG=Xl.21915 /DEF=Xenopus laevis, Similar to hypothetical protein FLJ13912, clone MGC:53660 IMAGE:4887946, mRNA, complete cds. /PROD=Similar to hypothetical protein FLJ13912 /FL=gb:BC043845.1
Xl.18054.1.A1_at	5.69745	3.26707	3.26707	6.93948	9.287	9.79108	8.46221	4.0772	8.61995	-4.54275	-5.74578	0.000350493	0.00137433	0.187686	gb:CB197689 /DB_XREF=gi:29145640 /DB_XREF=AGENCOURT_11244619 /CLONE=IMAGE:6872587 /TID=Xl.18054.1 /CNT=6 /FEA=EST /TIER=ConsEnd /STK=0 /UG=Xl.18054 /UG_TITLE=ESTs, Weakly similar to synaptotagmin-like 4 (granuphilin-a) (Homo sapiens) (H.sapiens)
Xl.23838.1.A1_at	6.32672	3.7754	3.7754	8.91752	9.51526	9.42346	8.80862	4.62584	9.16622	-4.54038	-7.59799	4.68211e-05	0.000355648	2.33048	gb:BQ397821 /DB_XREF=gi:21085508 /DB_XREF=NISC_mo02c11.x1 /CLONE=IMAGE:5162109 /TID=Xl.23838.1 /CNT=17 /FEA=EST /TIER=ConsEnd /STK=4 /UG=Xl.23838 /UG_TITLE=ESTs, Weakly similar to GRAN_HUMAN Grancalcin (H.sapiens)
Xl.19293.1.A1_at	4.51453	3.63992	3.63992	8.44292	8.48477	8.19078	8.7621	3.93146	8.47014	-4.53868	-16.2223	1.14513e-07	9.60601e-06	8.47749	gb:BQ384279 /DB_XREF=gi:21071966 /DB_XREF=NISC_mn05h01.x1 /CLONE=IMAGE:5049432 /TID=Xl.19293.1 /CNT=2 /FEA=EST /TIER=ConsEnd /STK=1 /UG=Xl.19293 /UG_TITLE=ESTs
Xl.8947.1.S1_x_at	7.03572	5.5965	5.5965	11.0054	10.5345	10.5468	10.3623	6.07624	10.6123	-4.53601	-12.008	1.32359e-06	3.58524e-05	6.052	gb:BC044009.1 /DB_XREF=gi:27882653 /TID=Xl.8947.1 /CNT=171 /FEA=FLmRNA /TIER=FL+Stack /STK=49 /UG=Xl.8947 /DEF=Xenopus laevis, Similar to high mobility group box 3, clone MGC:54022 IMAGE:5571573, mRNA, complete cds. /PROD=Similar to high mobility group box 3 /FL=gb:BC044009.1
Xl.3743.1.A1_at	6.02046	5.86588	5.86588	10.493	10.4815	10.1416	10.6848	5.91741	10.4502	-4.53284	-21.7481	1.01184e-08	3.12424e-06	10.6979	gb:BF428313 /DB_XREF=gi:11440047 /DB_XREF=daa07f02.x1 /CLONE=IMAGE:4055570 /TID=Xl.3743.1 /CNT=3 /FEA=EST /TIER=ConsEnd /STK=1 /UG=Xl.3743 /UG_TITLE=ESTs, Weakly similar to A35098 MHC class III histocompatibility antigen HLA-B-associated transcript 3 - human (H.sapiens)
Xl.3404.1.S1_at	6.1475	5.29568	5.29568	9.83654	9.6814	10.2948	10.532	5.57962	10.0862	-4.50657	-14.4363	2.97707e-07	1.44878e-05	7.54843	gb:BC047256.1 /DB_XREF=gi:28958136 /TID=Xl.3404.1 /CNT=44 /FEA=FLmRNA /TIER=FL+Stack /STK=10 /UG=Xl.3404 /DEF=Xenopus laevis, similar to ubiquitin activating enzyme, clone MGC:52522 IMAGE:5572791, mRNA, complete cds. /PROD=similar to ubiquitin activating enzyme /FL=gb:AB040073.1 gb:BC047256.1
Xl.3752.1.A1_at	4.26734	3.04127	3.04127	7.58287	7.59689	8.17596	8.467	3.44996	7.95568	-4.50572	-12.0106	1.32122e-06	3.58524e-05	6.05382	gb:BG555242 /DB_XREF=gi:13567022 /DB_XREF=de99f10.x1 /CLONE=IMAGE:3549858 /TID=Xl.3752.1 /CNT=6 /FEA=EST /TIER=ConsEnd /STK=1 /UG=Xl.3752 /UG_TITLE=ESTs, Weakly similar to T09B4.10.p (Caenorhabditis elegans) (C.elegans)
Xl.7578.1.A1_at	4.44875	2.86681	2.86681	8.35015	8.39149	7.15837	7.66569	3.39412	7.89143	-4.49731	-9.6065	7.76941e-06	0.000109756	4.22368	gb:BM262674 /DB_XREF=gi:17925714 /DB_XREF=daj01a08.x1 /CLONE=IMAGE:5048367 /TID=Xl.7578.1 /CNT=14 /FEA=EST /TIER=Stack /STK=6 /UG=Xl.7578 /UG_TITLE=ESTs, Weakly similar to NAH1_HUMAN Sodiumhydrogen exchanger 1 (Na(+)H(+) exchanger 1) (NHE-1) (Na+H+ antiporter, amiloride-sensitive) (APNH) (H.sapiens)
Xl.4171.1.S1_at	3.96902	4.61708	4.61708	9.45948	9.50564	8.19505	8.38348	4.40106	8.88591	-4.48485	-11.5572	1.79889e-06	4.43354e-05	5.7386	gb:BC045225.1 /DB_XREF=gi:28175688 /TID=Xl.4171.1 /CNT=27 /FEA=FLmRNA /TIER=FL /STK=3 /UG=Xl.4171 /DEF=Xenopus laevis, Similar to expressed sequence AW011752, clone MGC:53118 IMAGE:5542476, mRNA, complete cds. /PROD=Similar to expressed sequence AW011752 /FL=gb:BC045225.1
Xl.7518.1.S1_at	5.10604	3.44696	3.44696	9.3139	8.73672	8.71285	7.15389	3.99999	8.47934	-4.47935	-7.72937	4.11765e-05	0.000328183	2.46672	gb:BQ384851 /DB_XREF=gi:21072538 /DB_XREF=NISC_mn09a08.y1 /CLONE=IMAGE:5072918 /TID=Xl.7518.1 /CNT=8 /FEA=EST /TIER=ConsEnd /STK=4 /UG=Xl.7518 /UG_TITLE=ESTs, Highly similar to S53014 RNA polymerase II - human (H.sapiens)
Xl.7723.1.S1_at	2.27626	2.71799	2.71799	7.4304	6.70672	7.29114	6.75832	2.57075	7.04664	-4.4759	-17.0725	7.52055e-08	7.85214e-06	8.87767	gb:BC046573.1 /DB_XREF=gi:28302202 /TID=Xl.7723.1 /CNT=45 /FEA=FLmRNA /TIER=FL+Stack /STK=10 /UG=Xl.7723 /DEF=Xenopus laevis, clone MGC:53437 IMAGE:5571896, mRNA, complete cds. /PROD=Unknown (protein for MGC:53437) /FL=gb:BC046573.1
Xl.4340.1.A1_at	4.47292	4.95579	4.95579	9.81155	9.07263	9.04683	9.12126	4.79483	9.26307	-4.46824	-16.845	8.39927e-08	8.613e-06	8.77305	gb:BM190837 /DB_XREF=gi:17526800 /DB_XREF=daj32a08.x1 /CLONE=IMAGE:5077934 /TID=Xl.4340.1 /CNT=8 /FEA=EST /TIER=Stack /STK=6 /UG=Xl.4340 /UG_TITLE=ESTs, Highly similar to CYCK_HUMAN Cyclin K (H.sapiens)
Xl.128.1.S1_at	6.47659	6.66438	6.66438	11.0189	10.5204	11.2649	11.4738	6.60178	11.0695	-4.46772	-17.0982	7.42771e-08	7.85214e-06	8.8894	gb:BC045233.1 /DB_XREF=gi:28277304 /TID=Xl.128.1 /CNT=37 /FEA=FLmRNA /TIER=FL+Stack /STK=6 /UG=Xl.128 /DEF=Xenopus laevis, similar to vimentin, clone MGC:53233 IMAGE:5543495, mRNA, complete cds. /PROD=similar to vimentin /FL=gb:BC045233.1
Xl.19967.1.S1_at	2.40921	2.67758	2.67758	6.95484	7.25152	7.46755	6.54657	2.58812	7.05512	-4.467	-17.1284	7.32036e-08	7.85214e-06	8.90315	gb:BQ398292 /DB_XREF=gi:21085979 /DB_XREF=NISC_mo06c04.x1 /CLONE=IMAGE:5162479 /TID=Xl.19967.1 /CNT=8 /FEA=EST /TIER=ConsEnd /STK=3 /UG=Xl.19967 /UG_TITLE=ESTs
Xl.15799.1.A1_at	3.22046	3.45586	3.45586	8.03797	7.94459	7.42828	7.92776	3.37739	7.83465	-4.45726	-19.9334	2.08759e-08	4.20594e-06	10.0592	gb:BF049206 /DB_XREF=gi:10767709 /DB_XREF=dc06a01.x1 /CLONE=IMAGE:3381672 /TID=Xl.15799.1 /CNT=2 /FEA=EST /TIER=ConsEnd /STK=1 /UG=Xl.15799 /UG_TITLE=ESTs, Weakly similar to T12518 hypothetical protein DKFZp434D193.1 - human (fragment) (H.sapiens)
Xl.13420.1.S1_at	4.89096	5.20511	5.20511	9.54768	9.39077	9.12251	10.161	5.10039	9.55549	-4.45509	-16.1173	1.20791e-07	9.75899e-06	8.42629	gb:BC043780.1 /DB_XREF=gi:27694690 /TID=Xl.13420.1 /CNT=11 /FEA=mRNA /TIER=ConsEnd /STK=3 /UG=Xl.13420 /UG_TITLE=Xenopus laevis, Similar to RIKEN cDNA 1110014L17 gene, clone IMAGE:5536885, mRNA, partial cds /DEF=Xenopus laevis, Similar to RIKEN cDNA 1110014L17 gene, clone IMAGE:5536885, mRNA, partial cds.
Xl.4312.1.A1_at	3.55299	4.20465	4.20465	8.48354	8.37016	7.90967	8.97114	3.98743	8.43363	-4.4462	-14.7705	2.46966e-07	1.29753e-05	7.73213	gb:BJ045089 /DB_XREF=gi:17418075 /DB_XREF=BJ045089 /CLONE=XL003a09 /TID=Xl.4312.1 /CNT=4 /FEA=EST /TIER=ConsEnd /STK=2 /UG=Xl.4312 /UG_TITLE=ESTs, Highly similar to AN1H_HUMAN WD-repeat protein An11 homolog (H.sapiens)
Xl.6662.1.S1_at	5.65931	4.7005	4.7005	10.0889	10.0189	8.38502	9.34822	5.0201	9.46025	-4.44014	-9.84472	6.41351e-06	9.83433e-05	4.42395	gb:BJ092300 /DB_XREF=gi:17591333 /DB_XREF=BJ092300 /CLONE=XL064m15 /TID=Xl.6662.1 /CNT=18 /FEA=EST /TIER=Stack /STK=13 /UG=Xl.6662 /UG_TITLE=ESTs, Moderately similar to S66677 thioredoxin reductase (NADPH) (EC 1.6.4.5) - human (H.sapiens)
Xl.3194.1.A1_at	2.17241	2.9853	2.9853	7.21217	6.83424	7.06049	7.50853	2.71434	7.15386	-4.43952	-15.8234	1.40503e-07	1.02782e-05	8.28081	gb:BG731687 /DB_XREF=gi:14016762 /DB_XREF=dac29a12.x1 /CLONE=IMAGE:4408246 /TID=Xl.3194.1 /CNT=2 /FEA=EST /TIER=ConsEnd /STK=2 /UG=Xl.3194 /UG_TITLE=ESTs, Moderately similar to DPY3_HUMAN Dihydropyrimidinase related protein-3 (DRP-3) (Unc-33-like phosphoprotein) (ULIP protein) (Collapsin response mediator protein 4) (CRMP-4) (H.sapiens)
Xl.4390.1.A1_s_at	5.24879	5.3538	5.3538	9.93978	9.85074	9.76944	9.39925	5.3188	9.7398	-4.421	-21.0872	1.30805e-08	3.4143e-06	10.4741	gb:BE678262 /DB_XREF=gi:10059759 /DB_XREF=df85g07.x1 /CLONE=IMAGE:3746172 /TID=Xl.4390.1 /CNT=4 /FEA=EST /TIER=ConsEnd /STK=1 /UG=Xl.4390 /UG_TITLE=ESTs
Xl.15781.1.S1_at	3.28245	3.63992	3.63992	8.50249	7.45433	7.78122	7.99262	3.52077	7.93267	-4.4119	-15.8319	1.39886e-07	1.02782e-05	8.28505	gb:BJ056469 /DB_XREF=gi:17469447 /DB_XREF=BJ056469 /CLONE=XL035p01 /TID=Xl.15781.1 /CNT=2 /FEA=EST /TIER=ConsEnd /STK=1 /UG=Xl.15781 /UG_TITLE=ESTs, Weakly similar to hypothetical protein FLJ12085 (Homo sapiens) (H.sapiens)
Xl.25073.1.S1_at	8.70345	8.48505	8.48505	12.9792	12.8674	13.2213	12.7859	8.55785	12.9635	-4.40562	-21.6557	1.04837e-08	3.12424e-06	10.6671	gb:CB591138 /DB_XREF=gi:29508994 /DB_XREF=AGENCOURT_12925551 /CLONE=IMAGE:6899384 /TID=Xl.25073.1 /CNT=15 /FEA=EST /TIER=ConsEnd /STK=1 /UG=Xl.25073 /UG_TITLE=ESTs, Weakly similar to hypothetical protein FLJ13263 (Homo sapiens) (H.sapiens)
Xl.24034.1.S1_at	3.8963	4.45364	4.45364	8.75655	8.78909	8.54352	8.56958	4.26786	8.66469	-4.39683	-19.7925	2.21418e-08	4.2353e-06	10.0063	gb:BE575918 /DB_XREF=gi:9825717 /DB_XREF=dc57f09.x1 /CLONE=IMAGE:3401225 /TID=Xl.24034.1 /CNT=23 /FEA=EST /TIER=ConsEnd /STK=2 /UG=Xl.24034 /UG_TITLE=ESTs, Weakly similar to protein similar to E.coli yhdg and R. capsulatus nifR3 (Homo sapiens) (H.sapiens)
Xl.4312.1.A1_x_at	3.00118	4.62657	4.62657	8.30042	8.49879	7.73563	9.32223	4.08478	8.46427	-4.37949	-8.89239	1.41571e-05	0.000164226	3.59445	gb:BJ045089 /DB_XREF=gi:17418075 /DB_XREF=BJ045089 /CLONE=XL003a09 /TID=Xl.4312.1 /CNT=4 /FEA=EST /TIER=ConsEnd /STK=2 /UG=Xl.4312 /UG_TITLE=ESTs, Highly similar to AN1H_HUMAN WD-repeat protein An11 homolog (H.sapiens)
Xl.4183.1.S1_at	5.02408	5.25207	5.25207	9.55012	9.69958	10.0516	8.91129	5.17607	9.55315	-4.37708	-15.3609	1.79198e-07	1.11931e-05	8.04527	gb:BE507432 /DB_XREF=gi:9727207 /DB_XREF=dc34b02.x1 /CLONE=IMAGE:3398955 /TID=Xl.4183.1 /CNT=7 /FEA=EST /TIER=ConsEnd /STK=1 /UG=Xl.4183 /UG_TITLE=ESTs, Weakly similar to A55897 prolactin-induced T cell protein c15 - rat (R.norvegicus)
Xl.6112.1.A1_at	3.05617	2.53723	2.53723	7.29114	6.66438	6.8055	7.54761	2.71021	7.07716	-4.36694	-15.4953	1.66848e-07	1.10234e-05	8.11459	gb:CD362049 /DB_XREF=gi:31133460 /DB_XREF=AGENCOURT_14236925 /CLONE=IMAGE:6956608 /TID=Xl.6112.1 /CNT=5 /FEA=EST /TIER=ConsEnd /STK=4 /UG=Xl.6112 /UG_TITLE=ESTs, Weakly similar to GCN1_YEAST Translational activator GCN1 (S. cerevisiae)
Xl.3338.1.A1_at	4.56887	3.96609	3.96609	9.02844	7.84473	8.82639	8.42264	4.16702	8.53055	-4.36353	-13.4753	5.2158e-07	1.97955e-05	6.99187	gb:BJ043958 /DB_XREF=gi:17419811 /DB_XREF=BJ043958 /CLONE=XL011m06 /TID=Xl.3338.1 /CNT=23 /FEA=EST /TIER=Stack /STK=21 /UG=Xl.3338 /UG_TITLE=ESTs
Xl.21952.1.S1_at	5.1776	5.00075	5.00075	9.41202	9.00899	9.82791	9.43181	5.0597	9.42018	-4.36048	-18.3675	4.11182e-08	5.67428e-06	9.44188	gb:J03166.1 /DB_XREF=gi:214092 /TID=Xl.21952.1 /CNT=49 /FEA=FLmRNA /TIER=FL+Stack /STK=12 /UG=Xl.21952 /UG_TITLE=X.laevis cyclin B1 mRNA, complete cds /DEF=X.laevis cyclin B1 mRNA, complete cds. /FL=gb:J03166.1
Xl.21359.1.S1_at	5.31761	4.87066	4.87066	8.69446	9.51213	9.96777	9.34029	5.01965	9.37866	-4.35902	-13.888	4.0816e-07	1.71224e-05	7.23618	gb:CB559433 /DB_XREF=gi:29478963 /DB_XREF=AGENCOURT_12929810 /CLONE=IMAGE:4030454 /TID=Xl.21359.1 /CNT=4 /FEA=EST /TIER=ConsEnd /STK=2 /UG=Xl.21359 /UG_TITLE=ESTs
Xl.2557.1.S1_at	6.54387	5.25951	5.25951	8.32016	10.7108	9.90247	11.253	5.68763	10.0466	-4.35897	-6.5315	0.000142079	0.000725959	1.15004	gb:BG730898 /DB_XREF=gi:14015973 /DB_XREF=dac24h12.x1 /CLONE=IMAGE:4408175 /TID=Xl.2557.1 /CNT=11 /FEA=EST /TIER=Stack /STK=7 /UG=Xl.2557 /UG_TITLE=ESTs, Weakly similar to A39599 55K erythrocyte membrane protein - human (H.sapiens)
Xl.19139.1.S1_s_at	3.24386	2.99959	2.99959	8.71334	6.87199	5.94703	8.21186	3.08101	7.43605	-4.35504	-7.22449	6.81079e-05	0.000453198	1.93252	gb:BJ051749 /DB_XREF=gi:17498217 /DB_XREF=BJ051749 /CLONE=XL036k19 /TID=Xl.19139.1 /CNT=6 /FEA=EST /TIER=ConsEnd /STK=2 /UG=Xl.19139 /UG_TITLE=ESTs, Weakly similar to B Chain B, Crystal Structure Of A Bag Domain In Complex With The Hsc70 Atpase Domain (H.sapiens)
Xl.1824.1.S1_at	4.37915	5.16483	5.16483	9.19549	9.21551	9.01141	9.60188	4.90294	9.25607	-4.35314	-16.1222	1.20488e-07	9.75899e-06	8.4287	gb:AF495661.1 /DB_XREF=gi:20271037 /TID=Xl.1824.1 /CNT=16 /FEA=FLmRNA /TIER=FL /STK=3 /UG=Xl.1824 /DEF=Xenopus laevis phosphatidylinositol-4-phosphate 5-kinase type II beta mRNA, complete cds. /PROD=phosphatidylinositol-4-phosphate 5-kinase typeII beta /FL=gb:AF495661.1
Xl.12092.1.S1_at	5.52299	4.44402	4.44402	8.81733	9.3139	10.5289	7.95382	4.80368	9.15348	-4.3498	-7.635	4.51492e-05	0.000347314	2.36905	gb:AB066589.1 /DB_XREF=gi:15021903 /GEN=Xmegs /TID=Xl.12092.1 /CNT=1 /FEA=FLmRNA /TIER=FL /STK=1 /UG=Xl.12092 /UG_TITLE=Xenopus laevis Xmegs gene, complete cds /DEF=Xenopus laevis Xmegs gene, complete cds. /FL=gb:AB066589.1
Xl.7352.1.S1_at	3.28245	4.44402	4.44402	7.84661	8.114	8.61705	9.03788	4.05683	8.40389	-4.34706	-11.1544	2.38806e-06	5.17488e-05	5.44775	gb:BC044275.1 /DB_XREF=gi:28279873 /TID=Xl.7352.1 /CNT=14 /FEA=FLmRNA /TIER=FL /STK=4 /UG=Xl.7352 /DEF=Xenopus laevis, Similar to RIKEN cDNA E130305N23 gene, clone MGC:53176 IMAGE:5543004, mRNA, complete cds. /PROD=Similar to RIKEN cDNA E130305N23 gene /FL=gb:BC044275.1
Xl.13020.1.A1_at	3.40603	4.44402	4.44402	8.71814	8.50346	8.01892	8.51691	4.09802	8.43936	-4.34134	-13.7584	4.40503e-07	1.80042e-05	7.16036	gb:BJ092648 /DB_XREF=gi:17591860 /DB_XREF=BJ092648 /CLONE=XL087p14 /TID=Xl.13020.1 /CNT=10 /FEA=EST /TIER=Stack /STK=8 /UG=Xl.13020 /UG_TITLE=ESTs, Weakly similar to T08729 RING zinc finger protein homolog DKFZp566H073.1 - human (fragment) (H.sapiens)
Xl.13331.1.S1_at	3.06606	3.26707	3.26707	7.39238	7.16829	7.92435	7.66569	3.20007	7.53768	-4.33761	-18.3385	4.16606e-08	5.67428e-06	9.42978	gb:BJ050550 /DB_XREF=gi:17495196 /DB_XREF=BJ050550 /CLONE=XL024n09 /TID=Xl.13331.1 /CNT=20 /FEA=EST /TIER=ConsEnd /STK=1 /UG=Xl.13331 /UG_TITLE=ESTs, Weakly similar to A53152 annexin XI - human (H.sapiens)
Xl.9415.1.A1_at	4.31159	3.51528	3.51528	8.60291	8.74371	8.67654	6.41909	3.78071	8.11056	-4.32985	-7.59859	4.67936e-05	0.000355648	2.3311	gb:BJ090988 /DB_XREF=gi:17589434 /DB_XREF=BJ090988 /CLONE=XL110l22 /TID=Xl.9415.1 /CNT=2 /FEA=EST /TIER=ConsEnd /STK=2 /UG=Xl.9415 /UG_TITLE=ESTs, Weakly similar to I37371 ER calcium-binding protein ERC-55 precursor - human (H.sapiens)
Xl.23896.1.S1_at	4.6917	4.24835	4.24835	8.91618	8.10825	8.31809	9.53508	4.39613	8.7194	-4.32326	-12.168	1.18997e-06	3.43388e-05	6.16029	gb:BJ054157 /DB_XREF=gi:17500398 /DB_XREF=BJ054157 /CLONE=XL049g23 /TID=Xl.23896.1 /CNT=17 /FEA=EST /TIER=ConsEnd /STK=4 /UG=Xl.23896 /UG_TITLE=ESTs, Weakly similar to cytochrome c oxidase subunit IV isoform 2 (Homo sapiens) (H.sapiens)
Xl.14874.1.A1_at	2.34679	2.71799	2.71799	7.38587	7.00879	7.36051	5.9024	2.59426	6.91439	-4.32013	-11.612	1.732e-06	4.33679e-05	5.77739	gb:BM180490 /DB_XREF=gi:17404561 /DB_XREF=daj35g03.x1 /CLONE=IMAGE:5078573 /TID=Xl.14874.1 /CNT=2 /FEA=EST /TIER=ConsEnd /STK=1 /UG=Xl.14874 /UG_TITLE=ESTs, Highly similar to T2D1_HUMAN TRANSCRIPTION INITIATION FACTOR TFIID 250 KD SUBUNIT (TAFII-250) (TAFII250) (TBP-ASSOCIATED FACTOR 250 KD) (P250) (CELL CYCLE GENE 1 PROTEIN) (H.sapiens)
Xl.16367.1.A1_at	5.4478	4.39073	4.39073	9.10708	9.03397	9.40766	8.70216	4.74308	9.06272	-4.31963	-13.6246	4.76921e-07	1.90189e-05	7.08122	gb:BJ049050 /DB_XREF=gi:17373218 /DB_XREF=BJ049050 /CLONE=XL022o11 /TID=Xl.16367.1 /CNT=3 /FEA=EST /TIER=ConsEnd /STK=2 /UG=Xl.16367 /UG_TITLE=ESTs, Moderately similar to thyroid hormone receptor-associated protein, 95-kD subunit; thyroid hormone receptor-associated protein complex component (Homo sapiens) (H.sapiens)
Xl.9726.1.A1_at	6.866	6.42939	6.42939	10.9014	10.7222	11.3829	10.5698	6.57493	10.8941	-4.31915	-16.7715	8.7074e-08	8.77011e-06	8.73885	gb:BI444676 /DB_XREF=gi:15269383 /DB_XREF=de27d12.y3 /CLONE=IMAGE:3472966 /TID=Xl.9726.1 /CNT=8 /FEA=EST /TIER=ConsEnd /STK=0 /UG=Xl.9726 /UG_TITLE=ESTs, Moderately similar to SYFB_HUMAN Phenylalanyl-tRNA synthetase beta chain (Phenylalanine--tRNA ligase beta chain) (PheRS) (Protein HSPC173) (H.sapiens)
Xl.4722.1.S1_at	3.51932	4.79873	4.79873	9.09701	8.63669	8.90309	8.09339	4.37226	8.68254	-4.31028	-11.2681	2.20254e-06	4.93103e-05	5.53091	gb:X73316.1 /DB_XREF=gi:525296 /TID=Xl.4722.1 /CNT=29 /FEA=mRNA /TIER=Stack /STK=6 /UG=Xl.4722 /DEF=X.laevis mRNA for maternal B9.15 protein. /PROD=p30 B9.15
Xl.25231.1.S1_at	4.47065	5.00422	5.00422	8.82014	9.60666	8.86611	9.24793	4.82637	9.13521	-4.30884	-15.957	1.31128e-07	1.00254e-05	8.34735	gb:BF232023 /DB_XREF=gi:11174242 /DB_XREF=de14d02.x1 /CLONE=IMAGE:3437979 /TID=Xl.25231.1 /CNT=23 /FEA=EST /TIER=ConsEnd /STK=4 /UG=Xl.25231 /UG_TITLE=ESTs, Weakly similar to F22B5.10.p (Caenorhabditis elegans) (C.elegans)
Xl.22802.1.A1_at	3.98612	3.69643	3.69643	8.72133	8.61308	6.96175	8.11101	3.79299	8.10179	-4.3088	-10.4573	3.98661e-06	7.29079e-05	4.91842	gb:BJ085385 /DB_XREF=gi:17581349 /DB_XREF=BJ085385 /CLONE=XL105l22 /TID=Xl.22802.1 /CNT=6 /FEA=EST /TIER=ConsEnd /STK=5 /UG=Xl.22802 /UG_TITLE=ESTs, Moderately similar to uncharacterized hypothalamus protein HARP11 (Homo sapiens) (H.sapiens)
Xl.2251.1.S1_at	3.65982	4.62657	4.62657	8.46046	8.5419	8.68488	8.74668	4.30432	8.60848	-4.30416	-15.383	1.771e-07	1.11931e-05	8.05671	gb:AY168926.1 /DB_XREF=gi:29468100 /TID=Xl.2251.1 /CNT=23 /FEA=FLmRNA /TIER=FL+Stack /STK=8 /UG=Xl.2251 /DEF=Xenopus laevis heterochromatin protein 1 gamma mRNA, complete cds. /PROD=heterochromatin protein 1 gamma /FL=gb:AY168926.1
Xl.11986.1.S2_at	2.7956	2.56535	2.56535	6.46546	6.51272	7.27908	7.52497	2.6421	6.94556	-4.30346	-14.0469	3.72055e-07	1.60916e-05	7.32809	gb:BJ056176 /DB_XREF=gi:17423687 /DB_XREF=BJ056176 /CLONE=XL035a02 /TID=Xl.11986.1 /CNT=14 /FEA=FLmRNA /TIER=ConsEnd /STK=1 /UG=Xl.11986 /UG_TITLE=Xenopus laevis Tram1 mRNA, complete cds /FL=gb:AY029534.1
Xl.2515.1.S1_at	6.37304	5.42196	5.42196	10.3063	10.5228	9.9189	9.41988	5.73899	10.042	-4.30299	-12.3262	1.07244e-06	3.26673e-05	6.26591	gb:BC043889.1 /DB_XREF=gi:27694968 /TID=Xl.2515.1 /CNT=28 /FEA=FLmRNA /TIER=FL /STK=5 /UG=Xl.2515 /DEF=Xenopus laevis, Similar to methionine aminopeptidase 2, clone MGC:53792 IMAGE:5541807, mRNA, complete cds. /PROD=Similar to methionine aminopeptidase 2 /FL=gb:BC043889.1
Xl.13352.1.A1_at	6.05438	4.55684	4.55684	9.60027	9.4299	9.09726	9.30709	5.05602	9.35863	-4.30261	-11.3321	2.1051e-06	4.78754e-05	5.57739	gb:BJ050954 /DB_XREF=gi:17495600 /DB_XREF=BJ050954 /CLONE=XL027d04 /TID=Xl.13352.1 /CNT=2 /FEA=EST /TIER=ConsEnd /STK=2 /UG=Xl.13352 /UG_TITLE=ESTs, Moderately similar to testes specific A2 homolog (mouse); meichroacidin (Homo sapiens) (H.sapiens)
Xl.10421.1.A1_at	2.86338	2.70202	2.70202	7.03629	6.29378	7.25139	7.61047	2.75581	7.04798	-4.29217	-13.7892	4.32572e-07	1.78433e-05	7.17843	gb:BF024931 /DB_XREF=gi:10755350 /DB_XREF=dc81c10.x1 /CLONE=IMAGE:3403506 /TID=Xl.10421.1 /CNT=2 /FEA=EST /TIER=ConsEnd /STK=2 /UG=Xl.10421 /UG_TITLE=ESTs
Xl.853.1.S1_at	3.40603	4.55684	4.55684	7.35523	8.76788	8.91424	8.82075	4.17324	8.46452	-4.29129	-9.44163	8.89347e-06	0.00011999	4.08232	gb:L02957.1 /DB_XREF=gi:214746 /TID=Xl.853.1 /CNT=18 /FEA=FLmRNA /TIER=FL+Stack /STK=7 /UG=Xl.853 /DEF=Xenopus laevis ribonucleoprotein mRNA, complete cds. /PROD=ribonucleoprotein /FL=gb:L02957.1
Xl.4393.1.S1_at	6.28176	5.76271	5.76271	10.0789	9.94108	10.3877	10.4717	5.93572	10.2199	-4.28413	-17.9106	5.06379e-08	6.32148e-06	9.24873	gb:BC043906.1 /DB_XREF=gi:27881792 /TID=Xl.4393.1 /CNT=32 /FEA=FLmRNA /TIER=FL+Stack /STK=12 /UG=Xl.4393 /DEF=Xenopus laevis, Similar to apoptosis inhibitor 5, clone MGC:53885 IMAGE:5543163, mRNA, complete cds. /PROD=Similar to apoptosis inhibitor 5 /FL=gb:BC043906.1
Xl.23943.3.A1_at	2.54547	3.51219	3.51219	7.93347	6.84857	7.68006	7.36676	3.18995	7.45721	-4.26726	-12.3223	1.07516e-06	3.26673e-05	6.26334	gb:BI443398 /DB_XREF=gi:15268105 /DB_XREF=dai91b09.x1 /CLONE=IMAGE:5047648 /TID=Xl.23943.3 /CNT=1 /FEA=EST /TIER=ConsEnd /STK=1 /UG=Xl.23943 /UG_TITLE=ESTs, Moderately similar to peroxisomal farnesylated protein; Housekeeping gene, 33kD (Homo sapiens) (H.sapiens)
Xl.11723.1.A1_at	9.18256	2.59347	2.59347	9.18468	9.3267	8.68197	9.02785	4.78983	9.0553	-4.26547	-2.98369	0.016442	0.0298226	-3.86333	gb:AW148132 /DB_XREF=gi:6196028 /DB_XREF=da04e04.x1 /CLONE=XENOPUS_SOURCE_ID:xlnoc001o07 /TID=Xl.11723.1 /CNT=2 /FEA=EST /TIER=ConsEnd /STK=1 /UG=Xl.11723 /UG_TITLE=ESTs, Moderately similar to S68421 ATP-dependent clp proteinase (EC 3.4.21.-) chain P - human (H.sapiens)
Xl.23293.1.S1_at	7.41989	6.68203	6.68203	11.4194	11.1535	11.4224	10.7776	6.92798	11.1932	-4.26524	-15.4733	1.68806e-07	1.10234e-05	8.10327	gb:BC046578.1 /DB_XREF=gi:28302357 /TID=Xl.23293.1 /CNT=10 /FEA=FLmRNA /TIER=FL /STK=2 /UG=Xl.23293 /DEF=Xenopus laevis, Similar to lysyl-tRNA synthetase, clone MGC:53345 IMAGE:5571004, mRNA, complete cds. /PROD=Similar to lysyl-tRNA synthetase /FL=gb:BC046578.1
Xl.3138.1.S1_at	3.99556	4.66864	4.66864	8.90026	8.68383	8.91288	8.33233	4.44428	8.70732	-4.26305	-16.3688	1.06354e-07	9.32423e-06	8.54825	gb:BC045222.1 /DB_XREF=gi:28280032 /TID=Xl.3138.1 /CNT=32 /FEA=FLmRNA /TIER=FL /STK=3 /UG=Xl.3138 /DEF=Xenopus laevis, Similar to hydroxyacyl-Coenzyme A dehydrogenase3-ketoacyl-Coenzyme A thiolaseenoyl-Coenzyme A hydratase (trifunctional protein), beta subunit, clone MGC:53029 IMAGE:5537276, mRNA, complete cds. /PROD=Similar to hydroxyacyl-Coenzyme Adehydrogenase3-ketoacyl-Coenzyme Athiolaseenoyl…
Xl.16114.1.A1_at	6.55601	6.31156	6.31156	10.6983	10.7262	10.7868	10.4096	6.39305	10.6552	-4.26218	-21.2163	1.24329e-08	3.39981e-06	10.5186	gb:BJ051776 /DB_XREF=gi:17498244 /DB_XREF=BJ051776 /CLONE=XL036m05 /TID=Xl.16114.1 /CNT=7 /FEA=EST /TIER=ConsEnd /STK=3 /UG=Xl.16114 /UG_TITLE=ESTs
Xl.25365.1.A1_at	2.95372	2.39359	2.39359	7.72681	6.44594	7.74229	5.4544	2.5803	6.84236	-4.26206	-7.7854	3.90015e-05	0.000317397	2.52424	gb:BJ057183 /DB_XREF=gi:17469955 /DB_XREF=BJ057183 /CLONE=XL034e10 /TID=Xl.25365.1 /CNT=6 /FEA=EST /TIER=ConsEnd /STK=5 /UG=Xl.25365 /UG_TITLE=ESTs, Moderately similar to islet cell autoantigen 1, isoform 1; islet cell autoantigen p69 (Homo sapiens) (H.sapiens)
Xl.5851.1.S1_at	5.6331	5.54998	5.54998	9.99661	10.3824	9.5991	9.3684	5.57768	9.83664	-4.25896	-15.7179	1.48429e-07	1.06419e-05	8.22782	gb:BJ045616 /DB_XREF=gi:17369690 /DB_XREF=BJ045616 /CLONE=XL004l19 /TID=Xl.5851.1 /CNT=25 /FEA=EST /TIER=Stack /STK=8 /UG=Xl.5851 /UG_TITLE=ESTs, Highly similar to IF6_HUMAN Eukaryotic translation initiation factor 6 (eIF-6) (B4 integrin interactor) (CAB) (p27(BBP)) (B(2)GCN homolog) (H.sapiens)
Xl.9031.1.A1_x_at	2.46551	2.49227	2.49227	7.16298	5.90579	7.1446	6.7396	2.48335	6.73824	-4.25489	-13.2299	6.05422e-07	2.16853e-05	6.84267	gb:BG579679 /DB_XREF=gi:13594743 /DB_XREF=dab81d05.x1 /CLONE=IMAGE:4203321 /TID=Xl.9031.1 /CNT=2 /FEA=EST /TIER=ConsEnd /STK=1 /UG=Xl.9031 /UG_TITLE=ESTs, Weakly similar to hypothetical protein FLJ11193 (Homo sapiens) (H.sapiens)
Xl.24268.1.A1_at	3.92754	5.00048	5.00048	8.696	9.15523	9.00816	8.69714	4.64283	8.88913	-4.2463	-13.7275	4.48625e-07	1.82711e-05	7.14217	gb:BJ045804 /DB_XREF=gi:17372501 /DB_XREF=BJ045804 /CLONE=XL005f06 /TID=Xl.24268.1 /CNT=3 /FEA=EST /TIER=ConsEnd /STK=1 /UG=Xl.24268 /UG_TITLE=ESTs, Weakly similar to KIP1_HUMAN DNA-PKcs interacting protein (Kinase interacting protein) (KIP) (Calcium and integrin-binding protein) (CIB) (SNK interacting protein 2-28) (SIP2-28) (H.sapiens)
Xl.16807.1.A1_at	5.53859	5.25732	5.25732	9.39764	9.36522	10.1983	9.40425	5.35108	9.59135	-4.24028	-16.1013	1.21779e-07	9.75899e-06	8.41847	gb:BJ083816 /DB_XREF=gi:17579048 /DB_XREF=BJ083816 /CLONE=XL086f03 /TID=Xl.16807.1 /CNT=2 /FEA=EST /TIER=ConsEnd /STK=2 /UG=Xl.16807 /UG_TITLE=ESTs, Highly similar to microtubule-associated protein, RPEB family, member 2; T-cell activation protein, EB1 family; APC-binding protein EB1 (Homo sapiens) (H.sapiens)
Xl.26156.1.A1_at	5.01585	3.94609	3.94609	8.34111	8.17774	8.44921	9.19973	4.30268	8.54195	-4.23927	-11.9071	1.41636e-06	3.77092e-05	5.98295	gb:BQ397972 /DB_XREF=gi:21085659 /DB_XREF=NISC_mo03g04.x1 /CLONE=IMAGE:5162310 /TID=Xl.26156.1 /CNT=3 /FEA=EST /TIER=ConsEnd /STK=1 /UG=Xl.26156 /UG_TITLE=ESTs
Xl.23537.1.S1_at	2.25577	3.63992	3.63992	6.70771	7.30594	7.86326	7.77163	3.17854	7.41213	-4.2336	-10.0399	5.49704e-06	8.90459e-05	4.58463	gb:BC046270.1 /DB_XREF=gi:28278288 /TID=Xl.23537.1 /CNT=2 /FEA=FLmRNA /TIER=FL /STK=1 /UG=Xl.23537 /DEF=Xenopus laevis, Similar to RIKEN cDNA C330007P06 gene, clone MGC:53467 IMAGE:5572087, mRNA, complete cds. /PROD=Similar to RIKEN cDNA C330007P06 gene /FL=gb:BC046270.1
Xl.10034.1.S1_at	5.24879	3.39066	3.39066	9.18935	8.95737	8.71814	6.0908	4.01003	8.23892	-4.22888	-5.36	0.000562381	0.00193788	-0.316115	gb:BJ082237 /DB_XREF=gi:17576761 /DB_XREF=BJ082237 /CLONE=XL079h12 /TID=Xl.10034.1 /CNT=11 /FEA=EST /TIER=ConsEnd /STK=1 /UG=Xl.10034 /UG_TITLE=ESTs, Weakly similar to chromosome 21 open reading frame 70 (Homo sapiens) (H.sapiens)
Xl.14146.1.S1_at	4.89096	3.63992	3.63992	8.17204	7.77258	8.6648	8.52124	4.05694	8.28266	-4.22573	-11.4367	1.95615e-06	4.66107e-05	5.6527	gb:AW638998 /DB_XREF=gi:7396171 /DB_XREF=bl77d03.w1 /CLONE=PBX0077D03 /TID=Xl.14146.1 /CNT=8 /FEA=EST /TIER=ConsEnd /STK=0 /UG=Xl.14146 /UG_TITLE=ESTs, Moderately similar to tight junction protein 1 (zona occludens 1) (Homo sapiens) (H.sapiens)
Xl.337.2.S1_a_at	2.87078	2.90391	2.90391	7.86361	7.00157	6.80748	6.78432	2.89286	7.11425	-4.22138	-14.4427	2.96645e-07	1.44878e-05	7.55195	gb:U31118.1 /DB_XREF=gi:984819 /TID=Xl.337.2 /CNT=1 /FEA=FLmRNA /TIER=FL /STK=1 /UG=Xl.337 /DEF=Xenopus laevis cytoplasmic myosin II regulatory light chain mRNA, complete cds. /PROD=cytoplasmic myosin II regulatory light chain /FL=gb:U31118.1
Xl.5587.1.A1_at	3.50462	2.52465	2.52465	7.1699	8.08668	4.701	8.33201	2.8513	7.0724	-4.22109	-5.25682	0.00064042	0.00213566	-0.454479	gb:BJ045592 /DB_XREF=gi:17369658 /DB_XREF=BJ045592 /CLONE=XL004k12 /TID=Xl.5587.1 /CNT=16 /FEA=EST /TIER=Stack /STK=13 /UG=Xl.5587 /UG_TITLE=ESTs, Highly similar to DEADH (Asp-Glu-Ala-AspHis) box polypeptide 15; DEADH box-15 (RNA helicase 2) (Homo sapiens) (H.sapiens)
Xl.1573.1.A1_at	2.77435	2.6472	2.6472	6.69145	6.4673	6.93865	7.53545	2.68958	6.90821	-4.21863	-15.2657	1.88565e-07	1.13386e-05	7.99572	gb:BC046661.1 /DB_XREF=gi:28302172 /TID=Xl.1573.1 /CNT=29 /FEA=FLmRNA /TIER=FL+Stack /STK=14 /UG=Xl.1573 /DEF=Xenopus laevis, clone MGC:52931 IMAGE:4930117, mRNA, complete cds. /PROD=Unknown (protein for MGC:52931) /FL=gb:BC046661.1
Xl.23780.1.S1_at	6.05438	5.00048	5.00048	10.041	9.7003	9.55156	8.9809	5.35178	9.56844	-4.21666	-12.0097	1.322e-06	3.58524e-05	6.05322	gb:BJ052356 /DB_XREF=gi:17496426 /DB_XREF=BJ052356 /CLONE=XL041d17 /TID=Xl.23780.1 /CNT=25 /FEA=EST /TIER=Stack /STK=9 /UG=Xl.23780 /UG_TITLE=ESTs, Moderately similar to GBG5_HUMAN Guanine nucleotide-binding protein G(I)G(S)G(O) gamma-5 subunit (H.sapiens)
Xl.3334.1.A1_at	2.5212	4.30639	4.30639	8.79458	8.84833	6.00434	7.97339	3.71133	7.90516	-4.19384	-5.68765	0.000375891	0.00144144	0.113122	gb:BF612975 /DB_XREF=gi:11784145 /DB_XREF=dd79f06.x2 /CLONE=IMAGE:3430427 /TID=Xl.3334.1 /CNT=7 /FEA=EST /TIER=ConsEnd /STK=4 /UG=Xl.3334 /UG_TITLE=ESTs, Moderately similar to T17338 hypothetical protein DKFZp434O125.1 - human (fragment) (H.sapiens)
Xl.4351.1.S1_at	5.21301	4.18655	4.18655	9.26613	8.02855	8.10545	9.46425	4.52871	8.7161	-4.18739	-9.41038	9.12621e-06	0.000121983	4.05527	gb:BQ388287 /DB_XREF=gi:21075974 /DB_XREF=NISC_mn28f09.x1 /CLONE=IMAGE:5074721 /TID=Xl.4351.1 /CNT=12 /FEA=EST /TIER=ConsEnd /STK=5 /UG=Xl.4351 /UG_TITLE=ESTs
Xl.6881.1.S1_at	2.59167	2.46461	2.46461	7.36	7.04153	7.44194	4.91932	2.50696	6.6907	-4.18374	-7.31386	6.21849e-05	0.00042903	2.0292	gb:BG552546 /DB_XREF=gi:13564326 /DB_XREF=df43d04.x1 /CLONE=IMAGE:3581215 /TID=Xl.6881.1 /CNT=2 /FEA=EST /TIER=ConsEnd /STK=1 /UG=Xl.6881 /UG_TITLE=ESTs, Moderately similar to NADH dehydrogenase (ubiquinone) 1 alpha subcomplex, 2 (8kD, B8) (Homo sapiens) (H.sapiens)
Xl.16851.1.A1_at	3.46267	4.02087	4.02087	8.42269	7.64724	7.40679	8.59283	3.83481	8.01739	-4.18258	-12.3107	1.08334e-06	3.28289e-05	6.25565	gb:BM261629 /DB_XREF=gi:17924669 /DB_XREF=dai47a10.x1 /CLONE=IMAGE:4964658 /TID=Xl.16851.1 /CNT=2 /FEA=EST /TIER=ConsEnd /STK=1 /UG=Xl.16851 /UG_TITLE=ESTs
Xl.8024.1.S1_at	6.60535	5.38469	5.38469	10.4693	9.807	9.65526	9.95439	5.79157	9.9715	-4.17992	-11.7681	1.55627e-06	4.06557e-05	5.88679	gb:BQ385945 /DB_XREF=gi:21073632 /DB_XREF=NISC_mn15c09.x1 /CLONE=IMAGE:5073424 /TID=Xl.8024.1 /CNT=10 /FEA=mRNA /TIER=ConsEnd /STK=4 /UG=Xl.8024 /UG_TITLE=Xenopus laevis mitotic phosphoprotein 67 mRNA, partial cds
Xl.6464.1.S1_at	3.78242	4.55684	4.55684	8.97845	8.57249	7.96484	8.39272	4.2987	8.47712	-4.17842	-13.4926	5.16178e-07	1.97955e-05	7.00227	gb:AW633611 /DB_XREF=gi:7390692 /DB_XREF=bl09h06.w1 /CLONE=PBX0009H06 /TID=Xl.6464.1 /CNT=9 /FEA=EST /TIER=ConsEnd /STK=0 /UG=Xl.6464 /UG_TITLE=ESTs, Weakly similar to mitochondrial ribosomal protein L23; ribosomal protein L23-like; Ribosomal protein related to L23 (mitochondrial); L23 mitochondrial-related protein (Homo sapiens) (H.sapiens)
Xl.14600.1.A1_at	2.96541	4.05894	4.05894	7.9551	7.2806	8.0232	8.20555	3.69443	7.86611	-4.17168	-12.0128	1.31927e-06	3.58524e-05	6.05533	gb:BJ055826 /DB_XREF=gi:17469033 /DB_XREF=BJ055826 /CLONE=XL050m21 /TID=Xl.14600.1 /CNT=2 /FEA=EST /TIER=ConsEnd /STK=2 /UG=Xl.14600 /UG_TITLE=ESTs, Weakly similar to S56752 helicase SKI2W - human (H.sapiens)
Xl.7512.1.S1_at	4.78947	5.10704	5.10704	9.27219	9.07508	8.59107	9.74567	5.00118	9.171	-4.16982	-14.4107	3.02067e-07	1.45156e-05	7.5341	gb:BJ056775 /DB_XREF=gi:17479336 /DB_XREF=BJ056775 /CLONE=XL032p18 /TID=Xl.7512.1 /CNT=22 /FEA=mRNA /TIER=Stack /STK=9 /UG=Xl.7512 /UG_TITLE=Xenopus laevis, Similar to hepatocyte growth factor-regulated tyrosine kinase substrate, clone IMAGE:4683848, mRNA, partial cds
Xl.19336.1.A1_at	2.88504	3.21066	3.21066	7.79471	6.517	6.61546	8.15077	3.10212	7.26949	-4.16736	-9.88345	6.21891e-06	9.6404e-05	4.45608	gb:BQ384724 /DB_XREF=gi:21072411 /DB_XREF=NISC_mn08c12.x1 /CLONE=IMAGE:5049239 /TID=Xl.19336.1 /CNT=4 /FEA=EST /TIER=ConsEnd /STK=1 /UG=Xl.19336 /UG_TITLE=ESTs, Highly similar to A56650 2-oxoglutarate carrier protein - human (H.sapiens)
Xl.10367.1.S1_at	3.65982	2.30568	2.30568	6.81006	6.09742	7.2393	7.52642	2.75706	6.9183	-4.16124	-9.3999	9.20572e-06	0.000122087	4.04618	gb:BC045061.1 /DB_XREF=gi:27924447 /TID=Xl.10367.1 /CNT=1 /FEA=mRNA /TIER=ConsEnd /STK=1 /UG=Xl.10367 /UG_TITLE=Xenopus laevis, Similar to ATP binding protein associated with cell differentiation, clone IMAGE:4930405, mRNA, partial cds /DEF=Xenopus laevis, Similar to ATP binding protein associated with cell differentiation, clone IMAGE:4930405, mRNA, partial cds.
Xl.4507.1.A1_at	3.4767	4.01189	4.01189	7.98484	7.67405	8.37461	7.91897	3.8335	7.98812	-4.15462	-16.6338	9.31914e-08	8.94517e-06	8.67429	gb:BU908565 /DB_XREF=gi:24090479 /DB_XREF=AGENCOURT_10509570 /CLONE=IMAGE:6634054 /TID=Xl.4507.1 /CNT=6 /FEA=EST /TIER=ConsEnd /STK=0 /UG=Xl.4507 /UG_TITLE=ESTs, Weakly similar to hypothetical protein FLJ20514 (Homo sapiens) (H.sapiens)
Xl.5440.1.S1_at	6.88954	6.42939	6.42939	11	10.7126	10.9042	10.3093	6.58278	10.7315	-4.14876	-16.8168	8.51595e-08	8.65537e-06	8.75996	gb:BC049393.1 /DB_XREF=gi:29437188 /TID=Xl.5440.1 /CNT=92 /FEA=FLmRNA /TIER=FL+Stack /STK=30 /UG=Xl.5440 /DEF=Xenopus laevis, Similar to cyclin G1, clone MGC:53060 IMAGE:5541936, mRNA, complete cds. /PROD=Similar to cyclin G1 /FL=gb:BC049393.1
Xl.2141.1.S1_at	4.32834	4.59155	4.59155	8.81369	8.13594	8.36271	9.29707	4.50381	8.65235	-4.14854	-13.859	4.15167e-07	1.73166e-05	7.21927	gb:BC045124.1 /DB_XREF=gi:28175290 /TID=Xl.2141.1 /CNT=98 /FEA=FLmRNA /TIER=FL+Stack /STK=30 /UG=Xl.2141 /DEF=Xenopus laevis, Similar to heterogeneous nuclear ribonucleoprotein D-like, clone MGC:53310 IMAGE:5570524, mRNA, complete cds. /PROD=Similar to heterogeneous nuclearribonucleoprotein D-like /FL=gb:BC045124.1
Xl.2525.1.S1_at	5.68299	5.27052	5.27052	9.96863	9.193	9.44871	9.59396	5.40801	9.55108	-4.14307	-16.731	8.88264e-08	8.79458e-06	8.71992	gb:BU901809 /DB_XREF=gi:24083722 /DB_XREF=AGENCOURT_10180732 /CLONE=IMAGE:6318826 /TID=Xl.2525.1 /CNT=13 /FEA=EST /TIER=ConsEnd /STK=0 /UG=Xl.2525 /UG_TITLE=ESTs, Highly similar to 2113200H ribosomal protein S29 (Homo sapiens) (H.sapiens)
Xl.6614.1.S1_at	5.54242	4.9849	4.9849	9.67922	9.43989	9.3953	8.72128	5.17074	9.30892	-4.13818	-14.5365	2.81379e-07	1.42363e-05	7.60398	gb:BC041548.1 /DB_XREF=gi:27370941 /TID=Xl.6614.1 /CNT=7 /FEA=mRNA /TIER=ConsEnd /STK=3 /UG=Xl.6614 /UG_TITLE=Xenopus laevis, Similar to zinc finger protein, clone IMAGE:5542927, mRNA, partial cds /DEF=Xenopus laevis, Similar to zinc finger protein, clone IMAGE:5542927, mRNA, partial cds.
Xl.7576.1.A1_at	4.82104	4.82383	4.82383	8.75987	9.01788	8.72606	9.33852	4.8229	8.96058	-4.13768	-18.8017	3.389e-08	5.10674e-06	9.61976	gb:BE491158 /DB_XREF=gi:9610773 /DB_XREF=db45d06.x1 /CLONE=IMAGE:3301451 /TID=Xl.7576.1 /CNT=17 /FEA=EST /TIER=Stack /STK=10 /UG=Xl.7576 /UG_TITLE=ESTs, Weakly similar to JX0235 core protein MGC-24 - human (H.sapiens)
Xl.20760.1.S1_at	5.01863	5.12673	5.12673	9.34346	9.30946	8.90461	9.33826	5.0907	9.22395	-4.13325	-20.2303	1.84646e-08	3.92716e-06	10.169	gb:BC045245.1 /DB_XREF=gi:28280042 /TID=Xl.20760.1 /CNT=50 /FEA=FLmRNA /TIER=FL+Stack /STK=6 /UG=Xl.20760 /DEF=Xenopus laevis, Similar to expressed sequence AL022641, clone MGC:53824 IMAGE:5542324, mRNA, complete cds. /PROD=Similar to expressed sequence AL022641 /FL=gb:BC045245.1
Xl.20107.1.S1_at	4.91522	5.15617	5.15617	8.70861	8.82857	10.2115	9.07941	5.07586	9.20703	-4.13117	-11.3634	2.0593e-06	4.7492e-05	5.59998	gb:BQ399472 /DB_XREF=gi:21087159 /DB_XREF=NISC_mp03g05.x1 /CLONE=IMAGE:4965704 /TID=Xl.20107.1 /CNT=3 /FEA=EST /TIER=ConsEnd /STK=1 /UG=Xl.20107 /UG_TITLE=ESTs
Xl.8071.1.A1_at	4.92982	2.95372	2.95372	7.32817	7.78122	8.12076	7.7303	3.61242	7.74011	-4.12769	-8.5488	1.9169e-05	0.00019996	3.27525	gb:AW199959 /DB_XREF=gi:6480528 /DB_XREF=da24g06.x1 /CLONE=XENOPUS_SOURCE_ID:xlnga003p11 /TID=Xl.8071.1 /CNT=8 /FEA=EST /TIER=ConsEnd /STK=4 /UG=Xl.8071 /UG_TITLE=ESTs, Weakly similar to G01522 acidic 82 kDa protein - human (H.sapiens)
Xl.6749.1.A1_at	4.09427	4.30639	4.30639	8.40993	8.352	8.13697	8.55393	4.23568	8.36321	-4.12752	-20.6251	1.57258e-08	3.82326e-06	10.3117	gb:AI031479 /DB_XREF=gi:3819092 /DB_XREF=32G8-1P /CLONE=32G8-1 /TID=Xl.6749.1 /CNT=11 /FEA=EST /TIER=ConsEnd /STK=5 /UG=Xl.6749 /UG_TITLE=ESTs, Weakly similar to serine protease inhibitor, Kunitz type, 2; placental bikunin (Kunitz-type serine protease inhibitor) (Homo sapiens) (H.sapiens)
Xl.17470.1.A1_at	4.17187	4.51405	4.51405	8.46778	8.24549	8.65985	8.72145	4.39999	8.52364	-4.12365	-19.0832	2.99649e-08	4.95092e-06	9.73228	gb:BI314346 /DB_XREF=gi:14988673 /DB_XREF=daf90a07.x1 /CLONE=IMAGE:4757268 /TID=Xl.17470.1 /CNT=3 /FEA=EST /TIER=ConsEnd /STK=0 /UG=Xl.17470 /UG_TITLE=ESTs, Weakly similar to dynactin 1, isoform 1; dynactin 1 (p150, Glued (Drosophila) homolog); p150, Glued (Drosophila) homolog; 150 kDa dynein-associated polypeptide; p150-glued (Homo sapiens) (H.sapiens)
Xl.6740.1.A1_at	2.77435	4.55684	4.55684	8.31091	7.8109	7.96484	8.24939	3.96268	8.08401	-4.12133	-9.46947	8.69162e-06	0.000118274	4.10635	gb:BG020704 /DB_XREF=gi:12476783 /DB_XREF=dc76e01.x1 /CLONE=IMAGE:3403081 /TID=Xl.6740.1 /CNT=3 /FEA=EST /TIER=ConsEnd /STK=2 /UG=Xl.6740 /UG_TITLE=ESTs
Xl.25598.1.S1_at	4.98044	4.04159	4.04159	8.85485	8.73672	7.56872	8.74202	4.35454	8.47558	-4.12103	-10.6926	3.3423e-06	6.47324e-05	5.10095	gb:BQ388259 /DB_XREF=gi:21075946 /DB_XREF=NISC_mn28e07.x1 /CLONE=IMAGE:5074669 /TID=Xl.25598.1 /CNT=26 /FEA=EST /TIER=Stack /STK=7 /UG=Xl.25598 /UG_TITLE=ESTs, Moderately similar to MRG1_HUMAN Cbpp300-interacting transactivator 2 (MSG-related protein 1) (MRG1 protein) (H.sapiens)
Xl.6244.2.A1_at	3.28245	4.11408	4.11408	8.18562	7.91814	7.82669	7.86503	3.83687	7.94887	-4.112	-15.6514	1.53682e-07	1.06972e-05	8.1942	gb:BJ081703 /DB_XREF=gi:17575992 /DB_XREF=BJ081703 /CLONE=XL076i12 /TID=Xl.6244.2 /CNT=11 /FEA=EST /TIER=Stack /STK=7 /UG=Xl.6244 /UG_TITLE=Xenopus laevis, Similar to cargo selection protein (mannose 6 phosphate receptor binding protein), clone MGC:53750 IMAGE:4930763, mRNA, complete cds
Xl.12532.1.S1_at	5.01148	4.50813	4.50813	9.19005	8.936	8.71239	8.29436	4.67591	8.7832	-4.10729	-15.1726	1.98253e-07	1.16766e-05	7.94693	gb:AY253231.1 /DB_XREF=gi:30060004 /GEN=Rad9 /TID=Xl.12532.1 /CNT=6 /FEA=FLmRNA /TIER=FL /STK=2 /UG=Xl.12532 /DEF=Xenopus laevis PCNA-like DNA checkpoint protein Rad9 (Rad9) mRNA, complete cds. /PROD=PCNA-like DNA checkpoint protein Rad9 /FL=gb:AY253231.1
Xl.5983.2.A1_at	2.50006	2.59347	2.59347	6.66823	6.32621	8.23222	5.41786	2.56233	6.66113	-4.0988	-7.28289	6.41705e-05	0.000435578	1.9958	gb:CD324684 /DB_XREF=gi:31089235 /DB_XREF=AGENCOURT_14164133 /CLONE=IMAGE:6948834 /TID=Xl.5983.2 /CNT=23 /FEA=EST /TIER=Stack /STK=7 /UG=Xl.5983 /UG_TITLE=Xenopus laevis, Similar to GDP dissociation inhibitor 2, clone MGC:54003 IMAGE:5571335, mRNA, complete cds
Xl.3544.1.S1_at	4.78156	3.92206	3.92206	8.03865	8.39149	9.34694	7.43243	4.20856	8.30238	-4.09382	-9.1879	1.09923e-05	0.000138428	3.86025	gb:BJ052920 /DB_XREF=gi:17420761 /DB_XREF=BJ052920 /CLONE=XL043c03 /TID=Xl.3544.1 /CNT=26 /FEA=mRNA /TIER=Stack /STK=6 /UG=Xl.3544 /UG_TITLE=X.laevis mRNA for TFIIS elongation factor
Xl.15271.1.A1_at	6.6753	6.51985	6.51985	10.8912	10.5889	10.7931	10.3886	6.57167	10.6655	-4.0938	-19.6919	2.30974e-08	4.2353e-06	9.96826	gb:BJ043701 /DB_XREF=gi:17419554 /DB_XREF=BJ043701 /CLONE=XL010n15 /TID=Xl.15271.1 /CNT=3 /FEA=EST /TIER=ConsEnd /STK=2 /UG=Xl.15271 /UG_TITLE=ESTs
Xl.15828.1.A1_at	4.98044	3.92206	3.92206	8.85716	8.3199	7.70069	8.59414	4.27485	8.36797	-4.09312	-11.1741	2.35476e-06	5.15281e-05	5.4622	gb:BJ089281 /DB_XREF=gi:17586938 /DB_XREF=BJ089281 /CLONE=XL098a05 /TID=Xl.15828.1 /CNT=20 /FEA=EST /TIER=Stack /STK=14 /UG=Xl.15828 /UG_TITLE=ESTs, Weakly similar to MLF2_HUMAN Myeloid leukemia factor 2 (Myelodysplasia-myeloid leukemia factor 2) (H.sapiens)
Xl.15125.1.A1_at	5.76645	5.96709	5.96709	10.1062	9.4776	9.82402	10.5332	5.90021	9.98526	-4.08505	-14.9249	2.26839e-07	1.23472e-05	7.8154	gb:BM180214 /DB_XREF=gi:17404285 /DB_XREF=daj86e01.x1 /CLONE=IMAGE:5129928 /TID=Xl.15125.1 /CNT=4 /FEA=EST /TIER=ConsEnd /STK=1 /UG=Xl.15125 /UG_TITLE=ESTs, Weakly similar to hypothetical protein FLJ20254 (Homo sapiens) (H.sapiens)
Xl.10605.1.A1_at	5.92726	3.63992	3.63992	8.73846	8.92543	7.6373	8.64779	4.40237	8.48724	-4.08487	-6.98999	8.68258e-05	0.000523187	1.67433	gb:BI447036 /DB_XREF=gi:15271743 /DB_XREF=daa92g10.x3 /CLONE=IMAGE:4084819 /TID=Xl.10605.1 /CNT=8 /FEA=EST /TIER=ConsEnd /STK=4 /UG=Xl.10605 /UG_TITLE=ESTs, Weakly similar to chromosome 6 open reading frame 11; BING4 (Homo sapiens) (H.sapiens)
Xl.7018.1.S1_at	7.71812	7.12214	7.12214	11.2125	11.6593	11.5781	11.1595	7.3208	11.4024	-4.08156	-16.4788	1.00655e-07	9.07353e-06	8.60086	gb:BE131823 /DB_XREF=gi:8579186 /DB_XREF=db38e05.y1 /CLONE=IMAGE:3300800 /TID=Xl.7018.1 /CNT=7 /FEA=EST /TIER=ConsEnd /STK=1 /UG=Xl.7018 /UG_TITLE=ESTs, Weakly similar to SELW_HUMAN Selenoprotein W (H.sapiens)
Xl.4489.1.A1_a_at	2.77435	3.32136	3.32136	7.1214	6.50723	7.54706	7.70237	3.13902	7.21952	-4.0805	-12.6126	8.91101e-07	2.81162e-05	6.45351	gb:BG023388 /DB_XREF=gi:12479467 /DB_XREF=dg40h10.x1 /CLONE=IMAGE:3751531 /TID=Xl.4489.1 /CNT=3 /FEA=EST /TIER=ConsEnd /STK=3 /UG=Xl.4489 /UG_TITLE=ESTs
Xl.4558.1.S1_at	4.44875	4.04159	4.04159	8.37563	8.44776	8.51708	7.68565	4.17731	8.25653	-4.07922	-15.4113	1.7445e-07	1.11931e-05	8.07135	gb:U25164.1 /DB_XREF=gi:887796 /TID=Xl.4558.1 /CNT=2 /FEA=FLmRNA /TIER=FL /STK=1 /UG=Xl.4558 /DEF=Xenopus laevis fragile X mental retardation protein 1 mRNA, complete cds. /PROD=fragile X mental retardation protein 1 /FL=gb:U25164.1
Xl.3502.1.A1_x_at	4.05551	3.51528	3.51528	7.92748	6.64647	8.24939	8.25837	3.69535	7.77043	-4.07507	-9.99405	5.69844e-06	9.11512e-05	4.54717	gb:BJ090023 /DB_XREF=gi:17588042 /DB_XREF=BJ090023 /CLONE=XL101a06 /TID=Xl.3502.1 /CNT=18 /FEA=EST /TIER=Stack /STK=12 /UG=Xl.3502 /UG_TITLE=ESTs, Moderately similar to KAP0_HUMAN cAMP-dependent protein kinase type I-alpha regulatory chain (Tissue-specific extinguisher-1) (TSE1) (H.sapiens)
Xl.16754.1.A1_x_at	2.44569	2.76941	2.76941	6.416	8.1296	7.61303	4.783	2.6615	6.73541	-4.07391	-5.79813	0.000329219	0.00131424	0.254425	gb:BE678317 /DB_XREF=gi:10059871 /DB_XREF=df54a09.x1 /CLONE=IMAGE:3743128 /TID=Xl.16754.1 /CNT=6 /FEA=EST /TIER=ConsEnd /STK=2 /UG=Xl.16754 /UG_TITLE=ESTs, Weakly similar to ERF_HUMAN ETS-domain transcription factor ERF (Ets2 repressor factor) (H.sapiens)
Xl.25205.1.S1_at	5.89015	5.47275	5.47275	9.3645	9.31701	9.69009	10.3441	5.61188	9.67893	-4.06705	-13.855	4.16142e-07	1.73166e-05	7.21694	gb:BJ053672 /DB_XREF=gi:17421013 /DB_XREF=BJ053672 /CLONE=XL039m21 /TID=Xl.25205.1 /CNT=15 /FEA=EST /TIER=ConsEnd /STK=5 /UG=Xl.25205 /UG_TITLE=ESTs, Moderately similar to eukaryotic translation initiation factor 4E-like 3; eIF4E-like cap-binding protein (Homo sapiens) (H.sapiens)
Xl.12047.1.A1_at	2.64068	2.86681	2.86681	7.14095	6.745	7.23698	6.27048	2.79143	6.84835	-4.05692	-14.8915	2.31028e-07	1.24614e-05	7.79749	gb:BQ397978 /DB_XREF=gi:21085665 /DB_XREF=NISC_mo03g12.x1 /CLONE=IMAGE:5162326 /TID=Xl.12047.1 /CNT=13 /FEA=EST /TIER=Stack /STK=9 /UG=Xl.12047 /UG_TITLE=ESTs, Highly similar to A41222 ubiquitin--protein ligase (EC 6.3.2.19) E2A - human (H.sapiens)
Xl.18945.1.A1_at	3.19797	3.39933	3.39933	7.58192	7.80639	4.98442	9.17775	3.33221	7.38762	-4.05541	-4.96327	0.000934531	0.0028413	-0.856549	gb:BI448414 /DB_XREF=gi:15273121 /DB_XREF=dac75b05.x1 /CLONE=IMAGE:4435904 /TID=Xl.18945.1 /CNT=4 /FEA=EST /TIER=ConsEnd /STK=2 /UG=Xl.18945 /UG_TITLE=ESTs, Weakly similar to Zinc finger, C3HC4 type (RING finger) (Caenorhabditis elegans) (C.elegans)
Xl.25414.1.A1_at	6.70317	5.96709	5.96709	10.6623	9.62796	9.962	10.8101	6.21245	10.2656	-4.05314	-11.5858	1.76367e-06	4.39387e-05	5.75884	gb:BJ092620 /DB_XREF=gi:17591819 /DB_XREF=BJ092620 /CLONE=XL087o07 /TID=Xl.25414.1 /CNT=4 /FEA=EST /TIER=ConsEnd /STK=3 /UG=Xl.25414 /UG_TITLE=ESTs
Xl.799.1.S1_at	3.51932	2.71799	2.71799	7.95706	7.02423	6.71239	6.43464	2.9851	7.03208	-4.04698	-10.3811	4.22381e-06	7.48618e-05	4.85847	gb:CB756730 /DB_XREF=gi:29836237 /DB_XREF=AGENCOURT_12981200 /CLONE=IMAGE:6873787 /TID=Xl.799.1 /CNT=37 /FEA=mRNA /TIER=ConsEnd /STK=0 /UG=Xl.799 /UG_TITLE=Xenopus laevis histone protein (H5) mRNA
Xl.5786.1.A1_at	4.85316	4.54203	4.54203	8.51933	8.51933	8.71348	8.99364	4.64574	8.68644	-4.0407	-18.7095	3.5297e-08	5.19725e-06	9.58245	gb:AW764655 /DB_XREF=gi:7696543 /DB_XREF=da88a08.x1 /TID=Xl.5786.1 /CNT=2 /FEA=EST /TIER=ConsEnd /STK=2 /UG=Xl.5786 /UG_TITLE=ESTs
Xl.15992.1.A1_at	3.12574	4.1902	4.1902	7.88214	7.94959	7.41498	8.24967	3.83538	7.8741	-4.03871	-12.259	1.1207e-06	3.29878e-05	6.22123	gb:BJ052366 /DB_XREF=gi:17496436 /DB_XREF=BJ052366 /CLONE=XL041e09 /TID=Xl.15992.1 /CNT=9 /FEA=EST /TIER=ConsEnd /STK=4 /UG=Xl.15992 /UG_TITLE=ESTs, Weakly similar to ZN23_HUMAN Zinc finger protein 23 (Zinc finger protein KOX16) (DKFZp569D2231) (H.sapiens)
Xl.20205.1.A1_at	5.69745	6.01865	6.01865	9.88324	10.4209	10.1565	9.31433	5.91158	9.94372	-4.03214	-14.0027	3.81724e-07	1.63586e-05	7.30265	gb:BQ723836 /DB_XREF=gi:21862733 /DB_XREF=AGENCOURT_8104614 /CLONE=IMAGE:4888195 /TID=Xl.20205.1 /CNT=5 /FEA=EST /TIER=ConsEnd /STK=1 /UG=Xl.20205 /UG_TITLE=ESTs
Xl.9797.1.S1_at	5.09589	5.96944	5.96944	9.69361	10.0001	8.95947	10.1544	5.67826	9.7019	-4.02364	-11.3743	2.04357e-06	4.7492e-05	5.60785	gb:BM191795 /DB_XREF=gi:17527758 /DB_XREF=dag36d09.x3 /CLONE=IMAGE:4783529 /TID=Xl.9797.1 /CNT=10 /FEA=mRNA /TIER=ConsEnd /STK=2 /UG=Xl.9797 /UG_TITLE=Xenopus laevis clone S10-51-B11 mRNA sequence
Xl.24785.1.S1_at	4.80469	5.03129	5.03129	9.21669	9.12019	9.12071	8.44757	4.95576	8.97629	-4.02053	-16.3765	1.05942e-07	9.32423e-06	8.55195	gb:BM261081 /DB_XREF=gi:17924121 /DB_XREF=dag33g03.x3 /CLONE=IMAGE:4783300 /TID=Xl.24785.1 /CNT=26 /FEA=EST /TIER=ConsEnd /STK=5 /UG=Xl.24785 /UG_TITLE=ESTs, Weakly similar to T12456 hypothetical protein DKFZp564M2423.1 - human (H.sapiens)
Xl.11048.1.A1_at	2.77435	3.51528	3.51528	6.42029	7.47846	7.23164	8.01987	3.2683	7.28756	-4.01926	-10.4263	4.08116e-06	7.38228e-05	4.89411	gb:BE027028 /DB_XREF=gi:8320422 /DB_XREF=db36a12.x1 /CLONE=IMAGE:3300574 /TID=Xl.11048.1 /CNT=6 /FEA=EST /TIER=ConsEnd /STK=1 /UG=Xl.11048 /UG_TITLE=ESTs
Xl.4873.1.S1_at	6.82899	6.23301	6.23301	10.3024	10.4381	10.4923	10.5468	6.43167	10.4449	-4.01324	-17.8786	5.13926e-08	6.34671e-06	9.23495	gb:BC045248.1 /DB_XREF=gi:28175728 /TID=Xl.4873.1 /CNT=16 /FEA=FLmRNA /TIER=FL /STK=2 /UG=Xl.4873 /DEF=Xenopus laevis, Similar to nucleostemin, clone MGC:53851 IMAGE:5542803, mRNA, complete cds. /PROD=Similar to nucleostemin /FL=gb:BC045248.1
Xl.14681.1.A1_at	5.11012	5.38469	5.38469	9.17841	9.17757	9.39698	9.45158	5.29316	9.30114	-4.00797	-20.1575	1.90253e-08	3.97283e-06	10.1423	gb:BJ080156 /DB_XREF=gi:17573727 /DB_XREF=BJ080156 /CLONE=XL074k22 /TID=Xl.14681.1 /CNT=10 /FEA=EST /TIER=Stack /STK=6 /UG=Xl.14681 /UG_TITLE=ESTs, Moderately similar to 2210303A RNA helicase (Homo sapiens) (H.sapiens)
Xl.4061.1.A1_at	4.80071	4.35786	4.35786	9.52961	8.05294	7.76267	8.68561	4.50548	8.50771	-4.00223	-9.77784	6.76557e-06	0.000100782	4.36819	gb:BF024900 /DB_XREF=gi:10755319 /DB_XREF=dc80g06.x1 /CLONE=IMAGE:3403450 /TID=Xl.4061.1 /CNT=2 /FEA=EST /TIER=ConsEnd /STK=2 /UG=Xl.4061 /UG_TITLE=ESTs, Weakly similar to ST31_HUMAN Serinethreonine protein kinase 31 (Serinethreonine-protein kinase NYD-SPK) (H.sapiens)
Xl.1861.1.A1_x_at	6.03246	5.05496	5.05496	9.57178	9.82105	8.78491	9.33583	5.38079	9.37839	-3.9976	-11.7263	1.60135e-06	4.15157e-05	5.85762	gb:BG439496 /DB_XREF=gi:13349146 /DB_XREF=dab15e04.x1 /CLONE=IMAGE:4174543 /TID=Xl.1861.1 /CNT=2 /FEA=EST /TIER=ConsEnd /STK=2 /UG=Xl.1861 /UG_TITLE=ESTs, Weakly similar to guanine nucleotide-releasing factor 2 (Homo sapiens) (H.sapiens)
Xl.7259.1.S1_at	5.05217	4.57044	4.57044	8.40914	8.88093	8.55335	9.05443	4.73102	8.72447	-3.99345	-16.2324	1.13932e-07	9.60601e-06	8.48236	gb:CD361301 /DB_XREF=gi:31132712 /DB_XREF=AGENCOURT_14238004 /CLONE=IMAGE:6957314 /TID=Xl.7259.1 /CNT=25 /FEA=mRNA /TIER=Stack /STK=9 /UG=Xl.7259 /UG_TITLE=Xenopus laevis cDNA clone 16F8
Xl.5491.1.S1_at	3.91897	4.38767	4.38767	9.1353	8.15237	7.85957	7.75098	4.23144	8.22456	-3.99312	-11.3352	2.10048e-06	4.78754e-05	5.57965	gb:AF455043.1 /DB_XREF=gi:21728329 /GEN=Cav-2 /TID=Xl.5491.1 /CNT=11 /FEA=FLmRNA /TIER=FL /STK=1 /UG=Xl.5491 /DEF=Xenopus laevis caveolin-2 (Cav-2) mRNA, complete cds. /PROD=caveolin-2 /FL=gb:AF455043.1
Xl.6530.1.S1_at	4.05551	3.63992	3.63992	8.07173	7.56383	8.20963	7.24025	3.77845	7.77136	-3.99291	-13.9767	3.87541e-07	1.64848e-05	7.28765	gb:BF072239 /DB_XREF=gi:10848878 /DB_XREF=db53g06.x1 /CLONE=IMAGE:3302266 /TID=Xl.6530.1 /CNT=3 /FEA=EST /TIER=ConsEnd /STK=1 /UG=Xl.6530 /UG_TITLE=ESTs, Weakly similar to T13576 hypothetical protein 52C10.5 - fruit fly (Drosophila melanogaster) (D.melanogaster)
Xl.4439.1.A1_at	5.51442	3.62197	3.62197	7.99741	8.12787	9.05193	7.80261	4.25279	8.24495	-3.99217	-7.82914	3.73916e-05	0.000308777	2.56891	gb:BJ088137 /DB_XREF=gi:17585283 /DB_XREF=BJ088137 /CLONE=XL091p22 /TID=Xl.4439.1 /CNT=11 /FEA=EST /TIER=Stack /STK=7 /UG=Xl.4439 /UG_TITLE=ESTs, Moderately similar to hypothetical protein DKFZp586K0717 (Homo sapiens) (H.sapiens)
Xl.10937.1.A1_at	5.99476	5.89018	5.89018	9.44833	10.0975	10.3246	9.79808	5.92504	9.91713	-3.99208	-16.0181	1.27079e-07	9.86147e-06	8.37753	gb:BJ092756 /DB_XREF=gi:17592016 /DB_XREF=BJ092756 /CLONE=XL057e20 /TID=Xl.10937.1 /CNT=5 /FEA=EST /TIER=ConsEnd /STK=3 /UG=Xl.10937 /UG_TITLE=ESTs
Xl.18999.1.A1_at	4.55357	2.73171	2.73171	7.59234	7.19287	7.41466	7.12214	3.339	7.3305	-3.99151	-9.06462	1.22059e-05	0.0001485	3.75032	gb:BI449483 /DB_XREF=gi:15274190 /DB_XREF=daa95c07.x3 /CLONE=IMAGE:4085004 /TID=Xl.18999.1 /CNT=2 /FEA=EST /TIER=ConsEnd /STK=1 /UG=Xl.18999 /UG_TITLE=ESTs, Highly similar to aldehyde dehydrogenase 1 family, member A2; retinaldehyde dehydrogenase 2 (Homo sapiens) (H.sapiens)
Xl.7634.1.S1_at	3.51932	4.30639	4.30639	7.63699	7.25152	8.90102	8.35236	4.04403	8.03547	-3.99144	-9.61899	7.69091e-06	0.000109319	4.23429	gb:BJ050711 /DB_XREF=gi:17495357 /DB_XREF=BJ050711 /CLONE=XL045f24 /TID=Xl.7634.1 /CNT=37 /FEA=EST /TIER=Stack /STK=6 /UG=Xl.7634 /UG_TITLE=ESTs, Weakly similar to KAR4_YEAST KARYOGAMY PROTEIN KAR4 (S. cerevisiae)
Xl.25994.2.S1_x_at	2.40921	2.86681	2.86681	6.95151	6.30134	7.23164	6.27952	2.71427	6.691	-3.97673	-13.3756	5.53967e-07	2.0519e-05	6.93163	gb:CB563524 /DB_XREF=gi:29483054 /DB_XREF=AGENCOURT_13332931 /CLONE=IMAGE:6874644 /TID=Xl.25994.2 /CNT=2 /FEA=EST /TIER=ConsEnd /STK=1 /UG=Xl.25994 /UG_TITLE=ESTs, Weakly similar to RIKEN cDNA 1700034I23 (Mus musculus) (M.musculus)
Xl.25742.1.S1_at	5.69745	5.7562	5.7562	9.93145	9.81473	10.269	8.8197	5.73662	9.70872	-3.9721	-11.8536	1.46847e-06	3.8682e-05	5.94609	gb:AW782743 /DB_XREF=gi:7797349 /DB_XREF=db22h10.x1 /CLONE=XENOPUS_SOURCE_ID: /TID=Xl.25742.1 /CNT=4 /FEA=EST /TIER=ConsEnd /STK=2 /UG=Xl.25742 /UG_TITLE=ESTs
Xl.20487.1.A1_at	2.50006	3.92206	3.92206	7.58973	7.34778	7.71538	7.02423	3.44806	7.41928	-3.97122	-10.4682	3.95373e-06	7.26538e-05	4.927	gb:BQ731305 /DB_XREF=gi:21870202 /DB_XREF=AGENCOURT_8216906 /CLONE=IMAGE:4930290 /TID=Xl.20487.1 /CNT=4 /FEA=EST /TIER=ConsEnd /STK=0 /UG=Xl.20487 /UG_TITLE=ESTs
Xl.1276.2.S1_at	4.67809	2.95372	2.95372	7.95158	7.61592	7.3855	7.04153	3.52851	7.49863	-3.97012	-8.90248	1.40337e-05	0.000163135	3.60365	gb:BJ056359 /DB_XREF=gi:17469324 /DB_XREF=BJ056359 /CLONE=XL035j07 /TID=Xl.1276.2 /CNT=52 /FEA=EST /TIER=Stack /STK=15 /UG=Xl.1276 /UG_TITLE=X.laevis mRNA for protein phosphatase 2A alfa
Xl.7043.1.S1_at	2.5212	2.21745	2.21745	7.00029	5.98018	5.8617	6.27952	2.3187	6.28042	-3.96172	-13.2007	6.16365e-07	2.19163e-05	6.82471	gb:CB206691 /DB_XREF=gi:28246496 /DB_XREF=AGENCOURT_11371839 /CLONE=IMAGE:6878554 /TID=Xl.7043.1 /CNT=3 /FEA=EST /TIER=ConsEnd /STK=0 /UG=Xl.7043 /UG_TITLE=ESTs
Xl.8076.1.A1_at	5.51442	5.20511	5.20511	9.14864	9.01316	8.66303	10.2377	5.30821	9.26564	-3.95743	-10.9036	2.8619e-06	5.90258e-05	5.26125	gb:BF428354 /DB_XREF=gi:11440090 /DB_XREF=daa08b07.x1 /CLONE=IMAGE:4055389 /TID=Xl.8076.1 /CNT=5 /FEA=EST /TIER=ConsEnd /STK=3 /UG=Xl.8076 /UG_TITLE=ESTs, Moderately similar to hypothetical protein MGC3067 (Homo sapiens) (H.sapiens)
Xl.16708.1.A1_at	3.28245	3.63992	3.63992	7.72681	6.98002	7.1446	8.05191	3.52077	7.47583	-3.95507	-13.2272	6.06421e-07	2.16853e-05	6.84102	gb:BI445691 /DB_XREF=gi:15270398 /DB_XREF=dae57c10.x3 /CLONE=IMAGE:4678266 /TID=Xl.16708.1 /CNT=3 /FEA=EST /TIER=ConsEnd /STK=1 /UG=Xl.16708 /UG_TITLE=ESTs, Moderately similar to phosphodiesterase 6D, cGMP-specific, rod, delta (Homo sapiens) (H.sapiens)
Xl.1473.1.A1_at	3.51932	3.63992	3.63992	8.62474	8.63852	6.13582	6.81006	3.59972	7.55228	-3.95256	-6.5024	0.000146711	0.000742933	1.11586	gb:AW147858 /DB_XREF=gi:6195754 /DB_XREF=da10g01.x1 /CLONE=XENOPUS_SOURCE_ID:xlnoc003h01 /TID=Xl.1473.1 /CNT=4 /FEA=EST /TIER=ConsEnd /STK=2 /UG=Xl.1473 /UG_TITLE=ESTs, Weakly similar to hypothetical protein MGC3731 (Homo sapiens) (H.sapiens)
Xl.23886.1.A1_at	6.10512	6.46963	6.46963	10.8304	10.2066	9.96969	10.1791	6.34812	10.2964	-3.94832	-15.3197	1.83186e-07	1.11931e-05	8.02387	gb:BF610673 /DB_XREF=gi:11779594 /DB_XREF=dd85a04.y1 /CLONE=IMAGE:3430927 /TID=Xl.23886.1 /CNT=9 /FEA=EST /TIER=ConsEnd /STK=0 /UG=Xl.23886 /UG_TITLE=ESTs, Weakly similar to cytochrome c oxidase subunit VIa polypeptide 1 precursor; cytochrome c oxidase polypeptide VIa-liver, mitochondrial precursor; cytochrome-c oxidase chain VIa, hepatic; cytochrome c oxidase liver-specific subunit VIa; cytochro…
Xl.22784.2.S1_at	4.78156	5.69029	5.69029	9.94832	8.60783	8.73817	10.041	5.38738	9.33383	-3.94645	-9.02784	1.25961e-05	0.000151325	3.71726	gb:BJ051654 /DB_XREF=gi:17496024 /DB_XREF=BJ051654 /CLONE=XL036f24 /TID=Xl.22784.2 /CNT=31 /FEA=EST /TIER=Stack /STK=8 /UG=Xl.22784 /UG_TITLE=Xenopus laevis, Similar to coatomer protein complex, subunit zeta 1, clone IMAGE:5569945, mRNA, partial cds
Xl.23826.1.S1_at	2.95372	4.78156	4.78156	8.67225	8.46221	7.19638	8.09431	4.17228	8.10629	-3.93401	-7.5249	5.03274e-05	0.000373633	2.25385	gb:BG159978 /DB_XREF=gi:12693897 /DB_XREF=df72d11.x1 /CLONE=IMAGE:3744836 /TID=Xl.23826.1 /CNT=6 /FEA=EST /TIER=ConsEnd /STK=1 /UG=Xl.23826 /UG_TITLE=ESTs, Highly similar to CUL1_HUMAN CULLIN HOMOLOG 1 (CUL-1) (H.sapiens)
Xl.8284.1.A1_at	2.55722	3.92206	3.92206	7.65939	7.45269	6.95965	7.52899	3.46711	7.40018	-3.93306	-10.6347	3.48934e-06	6.6419e-05	5.05641	gb:BJ081026 /DB_XREF=gi:17575023 /DB_XREF=BJ081026 /CLONE=XL070c14 /TID=Xl.8284.1 /CNT=11 /FEA=EST /TIER=Stack /STK=8 /UG=Xl.8284 /UG_TITLE=ESTs
Xl.4562.1.S1_at	2.67758	2.44196	2.44196	5.99039	6.87199	7.18764	5.75924	2.5205	6.45232	-3.93182	-10.8379	3.00272e-06	6.10375e-05	5.21167	gb:BC044023.1 /DB_XREF=gi:27882198 /TID=Xl.4562.1 /CNT=21 /FEA=FLmRNA /TIER=FL+Stack /STK=9 /UG=Xl.4562 /DEF=Xenopus laevis, Similar to DKFZP564B167 protein, clone MGC:53394 IMAGE:5571539, mRNA, complete cds. /PROD=Similar to DKFZP564B167 protein /FL=gb:BC044023.1
Xl.894.1.S1_at	4.89096	2.91671	2.91671	7.65131	7.14197	7.45515	7.77314	3.5748	7.5054	-3.9306	-8.25578	2.50205e-05	0.000237881	2.99403	gb:AB008225.1 /DB_XREF=gi:2564062 /TID=Xl.894.1 /CNT=1 /FEA=FLmRNA /TIER=FL /STK=1 /UG=Xl.894 /DEF=Xenopus laevis mRNA for Na+-glucose cotransporter type 1 (SGLT-1)-like protein, complete cds. /PROD=Na+-glucose cotransporter type 1 (SGLT-1)-likeprotein /FL=gb:AB008225.1
Xl.4212.1.S1_at	6.17729	6.53605	6.53605	10.309	10.7235	9.90554	10.4299	6.41647	10.342	-3.92552	-15.8313	1.39928e-07	1.02782e-05	8.28476	gb:BC042273.1 /DB_XREF=gi:27769142 /TID=Xl.4212.1 /CNT=45 /FEA=FLmRNA /TIER=FL /STK=5 /UG=Xl.4212 /DEF=Xenopus laevis, Similar to chromosome 15 open reading frame 15, clone MGC:53444 IMAGE:5571948, mRNA, complete cds. /PROD=Similar to chromosome 15 open reading frame 15 /FL=gb:BC042273.1
Xl.19495.1.S1_at	3.91545	4.88957	4.88957	8.46267	9.27136	8.42712	7.79642	4.56486	8.48939	-3.92453	-10.0991	5.24831e-06	8.73578e-05	4.63283	gb:BC044294.1 /DB_XREF=gi:28422436 /TID=Xl.19495.1 /CNT=14 /FEA=FLmRNA /TIER=FL /STK=3 /UG=Xl.19495 /DEF=Xenopus laevis, similar to Serum paraoxonasearylesterase 2, clone MGC:53915 IMAGE:5569890, mRNA, complete cds. /PROD=similar to Serum paraoxonasearylesterase 2 /FL=gb:BC044294.1
Xl.21404.1.A1_at	4.67325	3.71613	3.71613	8.54234	8.06676	7.33207	7.8933	4.03517	7.95862	-3.92345	-11.072	2.53341e-06	5.4183e-05	5.38693	gb:BM180586 /DB_XREF=gi:17404657 /DB_XREF=daj37b11.x1 /CLONE=IMAGE:5078373 /TID=Xl.21404.1 /CNT=10 /FEA=EST /TIER=ConsEnd /STK=1 /UG=Xl.21404 /UG_TITLE=ESTs, Moderately similar to G3BP_HUMAN Ras-GTPase-activating protein binding protein 1 (GAP SH3-domain binding protein 1) (G3BP-1) (H.sapiens)
Xl.4138.2.S1_at	6.84503	6.34856	6.34856	10.2449	10.2657	10.1919	11.0327	6.51405	10.4338	-3.91975	-14.1912	3.42327e-07	1.55384e-05	7.41054	gb:CD360813 /DB_XREF=gi:31132224 /DB_XREF=AGENCOURT_14247432 /CLONE=IMAGE:6957624 /TID=Xl.4138.2 /CNT=180 /FEA=EST /TIER=Stack /STK=52 /UG=Xl.4138 /UG_TITLE=Xenopus laevis cytoplasmic beta actin mRNA, complete cds
Xl.5629.1.S1_at	4.18355	2.57687	2.57687	7.23582	6.80674	7.26914	6.79617	3.11243	7.02697	-3.91453	-9.65054	7.49652e-06	0.000107622	4.26105	gb:CA794075 /DB_XREF=gi:26043385 /DB_XREF=AGENCOURT_11043618 /CLONE=IMAGE:6866352 /TID=Xl.5629.1 /CNT=19 /FEA=EST /TIER=ConsEnd /STK=0 /UG=Xl.5629 /UG_TITLE=ESTs, Weakly similar to RFA2_HUMAN Replication protein A 32 kDa subunit (RP-A) (RF-A) (Replication factor-A protein 2) (H.sapiens)
Xl.8851.1.S1_at	6.55582	7.28064	7.28064	10.8411	10.8521	10.8685	11.2445	7.03903	10.9515	-3.9125	-15.4832	1.67926e-07	1.10234e-05	8.10834	gb:BC042345.1 /DB_XREF=gi:27503188 /TID=Xl.8851.1 /CNT=109 /FEA=FLmRNA /TIER=FL+Stack /STK=31 /UG=Xl.8851 /DEF=Xenopus laevis, Similar to integral membrane protein 2B, clone MGC:52745 IMAGE:4683980, mRNA, complete cds. /PROD=Similar to integral membrane protein 2B /FL=gb:BC042345.1
Xl.4046.1.A1_at	4.31159	4.94272	4.94272	9.10019	8.93901	7.4966	9.031	4.73234	8.6417	-3.90936	-9.43815	8.91906e-06	0.000120069	4.07931	gb:BE505231 /DB_XREF=gi:9708762 /DB_XREF=dc19g11.x1 /CLONE=IMAGE:3397604 /TID=Xl.4046.1 /CNT=7 /FEA=EST /TIER=ConsEnd /STK=2 /UG=Xl.4046 /UG_TITLE=ESTs
Xl.2771.1.S1_at	2.64068	3.51528	3.51528	6.40596	7.51553	7.40229	7.19469	3.22374	7.12962	-3.90588	-11.3343	2.10192e-06	4.78754e-05	5.57894	gb:BC043882.1 /DB_XREF=gi:27694955 /TID=Xl.2771.1 /CNT=27 /FEA=mRNA /TIER=Stack /STK=7 /UG=Xl.2771 /UG_TITLE=Xenopus laevis, clone IMAGE:5537235, mRNA, partial cds /DEF=Xenopus laevis, clone IMAGE:5537235, mRNA, partial cds.
Xl.24734.1.S1_at	4.67809	3.63992	3.63992	8.91658	8.40845	6.22699	7.99084	3.98598	7.88572	-3.89973	-6.46402	0.000153075	0.000764709	1.07062	gb:BG016574 /DB_XREF=gi:12469955 /DB_XREF=df62c07.x1 /CLONE=IMAGE:3743988 /TID=Xl.24734.1 /CNT=17 /FEA=EST /TIER=ConsEnd /STK=5 /UG=Xl.24734 /UG_TITLE=ESTs, Moderately similar to binder of Arl Two; Arf-like 2 binding protein BART1 (Homo sapiens) (H.sapiens)
Xl.4924.1.A1_at	5.55872	3.85766	3.85766	9.1366	8.67086	8.08735	7.39062	4.42468	8.32136	-3.89668	-7.33016	6.11665e-05	0.000424592	2.04674	gb:BG407964 /DB_XREF=gi:13314313 /DB_XREF=dd16b08.x1 /CLONE=IMAGE:3420614 /TID=Xl.4924.1 /CNT=2 /FEA=EST /TIER=ConsEnd /STK=2 /UG=Xl.4924 /UG_TITLE=ESTs
Xl.12848.2.S1_at	5.12674	5.46551	5.46551	9.12004	8.70612	9.30205	9.84841	5.35259	9.24416	-3.89157	-13.4677	5.23974e-07	1.97955e-05	6.9873	gb:BI350342 /DB_XREF=gi:15044788 /DB_XREF=dac66g09.x1 /CLONE=IMAGE:4435025 /TID=Xl.12848.2 /CNT=8 /FEA=EST /TIER=ConsEnd /STK=2 /UG=Xl.12848 /UG_TITLE=ESTs, Moderately similar to alpha 3 type IV collagen binding protein, isoform 2; goodpasture antigen-binding protein (Homo sapiens) (H.sapiens)
Xl.24762.1.S1_at	6.65705	7.37026	7.37026	11.5001	11.5334	10.3418	10.7056	7.13252	11.0202	-3.8877	-10.8759	2.92045e-06	6.00024e-05	5.24035	gb:BJ055421 /DB_XREF=gi:17423405 /DB_XREF=BJ055421 /CLONE=XL009i11 /TID=Xl.24762.1 /CNT=14 /FEA=EST /TIER=ConsEnd /STK=4 /UG=Xl.24762 /UG_TITLE=ESTs, Weakly similar to CX41_HUMAN Cytochrome c oxidase subunit IV isoform 1, mitochondrial precursor (COX IV-1) (Cytochrome c oxidase polypeptide IV) (H.sapiens)
Xl.16858.1.A1_at	4.36967	4.35302	4.35302	9.39652	9.33098	6.11791	8.12095	4.35857	8.24159	-3.88302	-5.39697	0.000536997	0.00187459	-0.266923	gb:CB756462 /DB_XREF=gi:29835969 /DB_XREF=AGENCOURT_12983367 /CLONE=IMAGE:6877180 /TID=Xl.16858.1 /CNT=6 /FEA=EST /TIER=ConsEnd /STK=0 /UG=Xl.16858 /UG_TITLE=ESTs, Moderately similar to aldehyde dehydrogenase 6 family, member A1; methylmalonate-semialdehyde dehydrogenase (Homo sapiens) (H.sapiens)
Xl.15251.1.S1_at	3.78242	6.09997	6.09997	9.1998	8.57924	9.46196	9.57174	5.32745	9.20318	-3.87573	-6.8562	9.99965e-05	0.000576536	1.52405	gb:BC045253.1 /DB_XREF=gi:28175664 /TID=Xl.15251.1 /CNT=27 /FEA=FLmRNA /TIER=FL /STK=2 /UG=Xl.15251 /DEF=Xenopus laevis, clone MGC:53931 IMAGE:5570100, mRNA, complete cds. /PROD=Unknown (protein for MGC:53931) /FL=gb:BC045253.1
Xl.6711.1.A1_at	3.34731	4.1723	4.1723	7.48238	8.0872	7.49454	8.02415	3.89731	7.77207	-3.87476	-13.2589	5.94769e-07	2.15979e-05	6.86047	gb:BG552317 /DB_XREF=gi:13564097 /DB_XREF=df38h03.x1 /CLONE=IMAGE:3581020 /TID=Xl.6711.1 /CNT=2 /FEA=EST /TIER=ConsEnd /STK=1 /UG=Xl.6711 /UG_TITLE=ESTs, Moderately similar to ADX_HUMAN Adrenodoxin, mitochondrial precursor (Adrenal ferredoxin) (Hepatoredoxin) (Ferredoxin 1) (H.sapiens)
Xl.3189.2.A1_at	7.03887	6.01865	6.01865	10.249	10.3095	10.0807	10.2883	6.35872	10.2319	-3.87316	-13.5366	5.02703e-07	1.96379e-05	7.02869	gb:BE678214 /DB_XREF=gi:10059663 /DB_XREF=df84b01.x1 /CLONE=IMAGE:3745993 /TID=Xl.3189.2 /CNT=12 /FEA=EST /TIER=Stack /STK=11 /UG=Xl.3189 /UG_TITLE=X.laevis mRNA for nucleolin
Xl.13424.1.S1_at	4.43758	4.65265	4.65265	9.08582	8.81431	8.40918	7.48901	4.58096	8.44958	-3.86862	-10.5391	3.74828e-06	6.96586e-05	4.9823	gb:BJ082304 /DB_XREF=gi:17576857 /DB_XREF=BJ082304 /CLONE=XL079k24 /TID=Xl.13424.1 /CNT=4 /FEA=EST /TIER=ConsEnd /STK=1 /UG=Xl.13424 /UG_TITLE=ESTs
Xl.7949.2.A1_at	5.41797	5.24898	5.24898	8.64483	9.25629	8.79536	9.9968	5.30531	9.17332	-3.86801	-11.6919	1.63948e-06	4.22247e-05	5.83355	gb:BJ085593 /DB_XREF=gi:17581643 /DB_XREF=BJ085593 /CLONE=XL106g18 /TID=Xl.7949.2 /CNT=16 /FEA=EST /TIER=Stack /STK=13 /UG=Xl.7949 /UG_TITLE=Xenopus laevis, Similar to RIKEN cDNA 1110007A14 gene, clone MGC:53148 IMAGE:5542709, mRNA, complete cds
Xl.23262.1.S1_at	5.67284	4.62657	4.62657	9.27105	9.12613	8.22155	8.75415	4.97533	8.84322	-3.86789	-10.8343	3.01072e-06	6.1092e-05	5.20892	gb:BC047986.1 /DB_XREF=gi:28839641 /TID=Xl.23262.1 /CNT=7 /FEA=FLmRNA /TIER=FL /STK=2 /UG=Xl.23262 /DEF=Xenopus laevis, Similar to HLA-B associated transcript 5, clone MGC:53904 IMAGE:5543594, mRNA, complete cds. /PROD=Similar to HLA-B associated transcript 5 /FL=gb:BC047986.1
Xl.385.1.S1_at	4.44875	4.21218	4.21218	7.88365	8.28489	7.88365	8.5766	4.29104	8.1572	-3.86616	-16.063	1.2419e-07	9.76883e-06	8.39963	gb:U44049.1 /DB_XREF=gi:2231172 /TID=Xl.385.1 /CNT=2 /FEA=FLmRNA /TIER=FL /STK=1 /UG=Xl.385 /DEF=Xenopus laevis cdc21 mRNA, complete cds. /PROD=cdc21p /FL=gb:U44049.1
Xl.25874.1.A1_s_at	5.39576	5.75605	5.75605	9.81891	9.05434	9.24216	9.88669	5.63595	9.50052	-3.86457	-14.2685	3.27503e-07	1.52901e-05	7.4543	gb:BF025056 /DB_XREF=gi:10755475 /DB_XREF=dc83f02.x1 /CLONE=IMAGE:3403707 /TID=Xl.25874.1 /CNT=2 /FEA=EST /TIER=ConsEnd /STK=2 /UG=Xl.25874 /UG_TITLE=ESTs
Xl.10272.1.A1_at	4.37697	5.7562	5.7562	9.49304	8.87505	8.67654	9.58396	5.29646	9.15715	-3.86069	-9.62168	7.67411e-06	0.000109295	4.23658	gb:BJ084343 /DB_XREF=gi:17579846 /DB_XREF=BJ084343 /CLONE=XL088o13 /TID=Xl.10272.1 /CNT=7 /FEA=EST /TIER=Stack /STK=6 /UG=Xl.10272 /UG_TITLE=ESTs, Moderately similar to hypothetical protein FLJ20546 (Homo sapiens) (H.sapiens)
Xl.13179.1.A1_at	4.75062	4.5281	4.5281	8.89139	8.35464	8.33861	8.24208	4.60227	8.45668	-3.85441	-16.9115	8.13123e-08	8.41326e-06	8.8038	gb:BJ099506 /DB_XREF=gi:17601836 /DB_XREF=BJ099506 /CLONE=XL150o11 /TID=Xl.13179.1 /CNT=3 /FEA=EST /TIER=ConsEnd /STK=3 /UG=Xl.13179 /UG_TITLE=ESTs, Weakly similar to EVG1 protein (Homo sapiens) (H.sapiens)
Xl.5566.1.A1_at	2.95372	3.63992	3.63992	7.25256	6.99626	7.47009	7.29377	3.41119	7.25317	-3.84198	-15.5124	1.65351e-07	1.10234e-05	8.12333	gb:BF072104 /DB_XREF=gi:10848743 /DB_XREF=db51f01.x1 /CLONE=IMAGE:3302041 /TID=Xl.5566.1 /CNT=4 /FEA=EST /TIER=ConsEnd /STK=1 /UG=Xl.5566 /UG_TITLE=ESTs, Moderately similar to A57090 CSA protein - human (H.sapiens)
Xl.21083.1.S1_at	5.40309	5.29568	5.29568	9.41065	9.427	9.13294	8.71005	5.33148	9.17016	-3.83868	-16.2876	1.10796e-07	9.60601e-06	8.5091	gb:CA973402 /DB_XREF=gi:27506056 /DB_XREF=AGENCOURT_10764119 /CLONE=IMAGE:6325608 /TID=Xl.21083.1 /CNT=3 /FEA=EST /TIER=ConsEnd /STK=0 /UG=Xl.21083 /UG_TITLE=ESTs, Highly similar to ring finger protein 7; sensitive to apoptosis gene (Homo sapiens) (H.sapiens)
Xl.11441.1.S1_at	5.55217	4.55684	4.55684	9.19439	8.55083	8.1016	9.05391	4.88862	8.72518	-3.83656	-10.687	3.35633e-06	6.48947e-05	5.09662	gb:BC043960.1 /DB_XREF=gi:27695021 /TID=Xl.11441.1 /CNT=14 /FEA=mRNA /TIER=ConsEnd /STK=0 /UG=Xl.11441 /UG_TITLE=Xenopus laevis, clone IMAGE:5571253, mRNA, partial cds /DEF=Xenopus laevis, clone IMAGE:5571253, mRNA, partial cds.
Xl.7402.1.A1_at	5.55217	6.12852	6.12852	9.32262	9.75457	10.5751	9.43691	5.9364	9.7723	-3.8359	-11.3997	2.00744e-06	4.73419e-05	5.62615	gb:BJ049838 /DB_XREF=gi:17379240 /DB_XREF=BJ049838 /CLONE=XL021f02 /TID=Xl.7402.1 /CNT=6 /FEA=EST /TIER=ConsEnd /STK=2 /UG=Xl.7402 /UG_TITLE=ESTs, Moderately similar to T08747 hypothetical protein DKFZp586B0519.1 - human (H.sapiens)
Xl.4192.1.A1_at	4.6785	5.1666	5.1666	7.92414	8.84245	9.64139	8.94531	5.0039	8.83832	-3.83442	-10.0477	5.46359e-06	8.87544e-05	4.59099	gb:BJ052024 /DB_XREF=gi:17496094 /DB_XREF=BJ052024 /CLONE=XL040c09 /TID=Xl.4192.1 /CNT=6 /FEA=EST /TIER=ConsEnd /STK=4 /UG=Xl.4192 /UG_TITLE=ESTs, Moderately similar to ELK4 protein, isoform b; ETS-domain protein; SRF accessory protein 1 (Homo sapiens) (H.sapiens)
Xl.7420.2.A1_at	4.77704	3.94799	3.94799	8.02757	7.99368	8.14248	8.03773	4.22434	8.05037	-3.82602	-15.0959	2.06643e-07	1.19175e-05	7.90651	gb:BG486680 /DB_XREF=gi:13434257 /DB_XREF=dc95a04.x1 /CLONE=IMAGE:3404814 /TID=Xl.7420.2 /CNT=7 /FEA=EST /TIER=Stack /STK=6 /UG=Xl.7420 /UG_TITLE=Xenopus laevis SUMO-1 activating enzyme E1 N subunit (Aos) mRNA, Aos-1 allele, complete cds
Xl.16193.1.A1_at	4.98044	2.53723	2.53723	6.74076	6.80914	7.60559	7.55146	3.35164	7.17674	-3.8251	-6.45625	0.0001544	0.000768988	1.06144	gb:BJ086429 /DB_XREF=gi:17582828 /DB_XREF=BJ086429 /CLONE=XL053a22 /TID=Xl.16193.1 /CNT=2 /FEA=EST /TIER=ConsEnd /STK=2 /UG=Xl.16193 /UG_TITLE=ESTs, Weakly similar to hypothetical protein MGC13096 (Homo sapiens) (H.sapiens)
Xl.8333.1.A1_at	5.82839	5.89971	5.89971	9.99999	9.73975	9.43354	9.61987	5.87594	9.69829	-3.82235	-18.2911	4.25613e-08	5.68391e-06	9.41	gb:BJ098999 /DB_XREF=gi:17601084 /DB_XREF=BJ098999 /CLONE=XL148m06 /TID=Xl.8333.1 /CNT=9 /FEA=EST /TIER=Stack /STK=9 /UG=Xl.8333 /UG_TITLE=ESTs, Weakly similar to Human host cell factor C1 like protein (Caenorhabditis elegans) (C.elegans)
Xl.2579.1.S1_at	2.77435	2.86681	2.86681	6.37175	6.22752	7.00558	7.01867	2.83599	6.65588	-3.81989	-14.6586	2.62791e-07	1.35343e-05	7.67118	gb:BC042315.1 /DB_XREF=gi:27769228 /TID=Xl.2579.1 /CNT=31 /FEA=FLmRNA /TIER=FL+Stack /STK=7 /UG=Xl.2579 /DEF=Xenopus laevis, Similar to inosine 5-phosphate dehydrogenase 2, clone MGC:53627 IMAGE:4724822, mRNA, complete cds. /PROD=Similar to inosine 5-phosphate dehydrogenase 2 /FL=gb:BC042315.1
Xl.6080.1.S1_at	6.15611	5.87734	5.87734	9.97673	9.63298	10.0208	9.5158	5.97026	9.78657	-3.81631	-17.3623	6.54587e-08	7.37053e-06	9.0085	gb:BE491194 /DB_XREF=gi:9610655 /DB_XREF=db43d01.x1 /CLONE=IMAGE:3301249 /TID=Xl.6080.1 /CNT=11 /FEA=EST /TIER=ConsEnd /STK=4 /UG=Xl.6080 /UG_TITLE=ESTs, Highly similar to LSM3_HUMAN U6 snRNA-associated Sm-like protein LSm3 (MDS017) (H.sapiens)
Xl.16751.1.A1_at	4.62808	2.86681	2.86681	8.03079	7.19287	6.34406	7.51305	3.4539	7.27019	-3.81629	-7.23895	6.71086e-05	0.000448367	1.94823	gb:BJ076909 /DB_XREF=gi:17521825 /DB_XREF=BJ076909 /CLONE=XL059d14 /TID=Xl.16751.1 /CNT=4 /FEA=EST /TIER=ConsEnd /STK=1 /UG=Xl.16751 /UG_TITLE=ESTs
Xl.3322.1.A1_at	4.18219	3.17691	3.17691	7.3227	7.20479	7.21213	7.56923	3.51201	7.32721	-3.81521	-13.1456	6.37627e-07	2.25328e-05	6.79068	gb:BF612809 /DB_XREF=gi:11783813 /DB_XREF=dd76h05.x2 /CLONE=IMAGE:3430496 /TID=Xl.3322.1 /CNT=7 /FEA=EST /TIER=ConsEnd /STK=1 /UG=Xl.3322 /UG_TITLE=ESTs, Weakly similar to zinc-fingers and homeoboxes 1; zinc fingers and homeobox 1 (Homo sapiens) (H.sapiens)
Xl.10730.1.S1_at	6.14844	4.07366	4.07366	8.95124	8.85699	8.71498	7.79573	4.76525	8.57973	-3.81448	-7.10586	7.69524e-05	0.000486154	1.80272	gb:AF545659.1 /DB_XREF=gi:26985224 /GEN=flot1a /TID=Xl.10730.1 /CNT=20 /FEA=FLmRNA /TIER=FL /STK=5 /UG=Xl.10730 /DEF=Xenopus laevis flotillin 1a (flot1a) mRNA, complete cds. /PROD=flotillin 1a /FL=gb:AF545660.1 gb:AF545659.1
Xl.5866.1.S1_at	7.39838	6.33568	6.33568	10.0954	10.5175	10.4303	10.9732	6.68992	10.5041	-3.81415	-11.4592	1.92565e-06	4.64741e-05	5.66882	gb:BQ386996 /DB_XREF=gi:21074683 /DB_XREF=NISC_mn21c12.x1 /CLONE=IMAGE:5074174 /TID=Xl.5866.1 /CNT=12 /FEA=EST /TIER=ConsEnd /STK=0 /UG=Xl.5866 /UG_TITLE=ESTs, Moderately similar to endothelial differentiation-related factor 1 (Homo sapiens) (H.sapiens)
Xl.6612.1.S1_at	4.67809	4.67022	4.67022	9.4185	8.40845	8.42785	7.69015	4.67284	8.48624	-3.8134	-10.3375	4.3666e-06	7.65655e-05	4.82397	gb:AW636655 /DB_XREF=gi:7393740 /DB_XREF=bl49b12.w1 /CLONE=PBX0049B12 /TID=Xl.6612.1 /CNT=12 /FEA=EST /TIER=ConsEnd /STK=0 /UG=Xl.6612 /UG_TITLE=ESTs, Weakly similar to RIKEN cDNA 2510027N19 (Mus musculus) (M.musculus)
Xl.7341.1.S1_at	5.89872	5.4534	5.4534	10.0479	9.50891	9.06581	9.03463	5.60184	9.41432	-3.81248	-12.887	7.48878e-07	2.51487e-05	6.62897	gb:CB592373 /DB_XREF=gi:29510229 /DB_XREF=AGENCOURT_13044136 /CLONE=IMAGE:6896939 /TID=Xl.7341.1 /CNT=6 /FEA=EST /TIER=ConsEnd /STK=4 /UG=Xl.7341 /UG_TITLE=ESTs, Weakly similar to UCRY_HUMAN Ubiquinol-cytochrome C reductase complex 6.4 kDa protein (Complex III subunit XI) (H.sapiens)
Xl.12366.1.S1_at	3.78242	4.23421	4.23421	6.8014	7.79196	8.3305	8.62292	4.08362	7.88669	-3.80308	-9.11777	1.16654e-05	0.000144216	3.79788	gb:BJ085629 /DB_XREF=gi:17581695 /DB_XREF=BJ085629 /CLONE=XL106i14 /TID=Xl.12366.1 /CNT=2 /FEA=EST /TIER=ConsEnd /STK=1 /UG=Xl.12366 /UG_TITLE=ESTs
Xl.11557.1.A1_at	3.97368	3.97368	3.97368	7.1245	6.745	8.43263	8.78597	3.97368	7.77203	-3.79835	-7.84485	3.68313e-05	0.000306585	2.58491	gb:BG348440 /DB_XREF=gi:13168877 /DB_XREF=dac41f02.x1 /CLONE=IMAGE:4412690 /TID=Xl.11557.1 /CNT=7 /FEA=EST /TIER=ConsEnd /STK=1 /UG=Xl.11557 /UG_TITLE=ESTs, Highly similar to protein phosphatase 1, catalytic subunit, beta isoform (Homo sapiens) (H.sapiens)
Xl.8107.1.S1_at	7.9035	7.97888	7.97888	11.9162	11.7955	11.8827	11.4003	7.95375	11.7487	-3.79492	-18.1456	4.54675e-08	5.93402e-06	9.34882	gb:BC046954.1 /DB_XREF=gi:28422718 /TID=Xl.8107.1 /CNT=50 /FEA=FLmRNA /TIER=FL+Stack /STK=7 /UG=Xl.8107 /DEF=Xenopus laevis, Similar to DnaJ (Hsp40) homolog, subfamily A, member 2, clone MGC:53478 IMAGE:5572243, mRNA, complete cds. /PROD=Similar to DnaJ (Hsp40) homolog, subfamily A,member 2 /FL=gb:BC046954.1
Xl.22087.1.A1_x_at	4.51357	5.78111	5.78111	9.17931	9.063	9.02901	9.33542	5.3586	9.15168	-3.79309	-11.4569	1.92878e-06	4.64741e-05	5.66715	gb:BF048544 /DB_XREF=gi:10767047 /DB_XREF=dc30c01.x1 /CLONE=IMAGE:3398592 /TID=Xl.22087.1 /CNT=3 /FEA=EST /TIER=ConsEnd /STK=3 /UG=Xl.22087 /UG_TITLE=ESTs
Xl.15977.1.S1_at	5.07137	5.20511	5.20511	9.75655	9.02666	8.18371	8.82457	5.16053	8.94787	-3.78734	-10.9583	2.75043e-06	5.76196e-05	5.30223	gb:BJ043493 /DB_XREF=gi:17417779 /DB_XREF=BJ043493 /CLONE=XL010a08 /TID=Xl.15977.1 /CNT=12 /FEA=EST /TIER=ConsEnd /STK=4 /UG=Xl.15977 /UG_TITLE=ESTs, Moderately similar to nucleolar protein family A, member 3; homolog of yeast Nop10p; hypothetical protein Nop10p (Homo sapiens) (H.sapiens)
Xl.1430.1.S1_at	4.20767	3.59345	3.59345	8.14415	6.95267	8.25075	6.99131	3.79819	7.58472	-3.78653	-9.67613	7.34279e-06	0.000106454	4.2827	gb:BC041208.1 /DB_XREF=gi:27371250 /TID=Xl.1430.1 /CNT=32 /FEA=FLmRNA /TIER=FL+Stack /STK=12 /UG=Xl.1430 /DEF=Xenopus laevis, Similar to synaptosomal-associated protein, 29kDa, clone MGC:52674 IMAGE:4682503, mRNA, complete cds. /PROD=Similar to synaptosomal-associated protein,29kDa /FL=gb:BC041208.1
Xl.2583.1.S1_at	7.90942	7.50002	7.50002	11.2721	11.6787	10.8755	11.8583	7.63649	11.4212	-3.78467	-13.4391	5.3309e-07	2.00083e-05	6.97005	gb:BJ045215 /DB_XREF=gi:17419968 /DB_XREF=BJ045215 /CLONE=XL003h01 /TID=Xl.2583.1 /CNT=15 /FEA=EST /TIER=ConsEnd /STK=4 /UG=Xl.2583 /UG_TITLE=ESTs
Xl.6994.1.S1_at	4.67809	4.1723	4.1723	7.88975	9.40312	7.89608	7.30854	4.3409	8.12437	-3.78347	-8.26402	2.48312e-05	0.000236277	3.00205	gb:AF159166.1 /DB_XREF=gi:5306100 /GEN=FRL2 /TID=Xl.6994.1 /CNT=2 /FEA=FLmRNA /TIER=FL /STK=1 /UG=Xl.6994 /DEF=Xenopus laevis FRL2 protein (FRL2) mRNA, complete cds. /PROD=FRL2 protein /FL=gb:AF159166.1
Xl.6425.1.S1_at	3.42161	5.05607	5.05607	7.45457	7.96308	8.86933	8.8872	4.51125	8.29355	-3.7823	-7.44864	5.42969e-05	0.000393813	2.17326	gb:AW633204 /DB_XREF=gi:7390285 /DB_XREF=bl04h07.x1 /CLONE=PBX0004H07 /TID=Xl.6425.1 /CNT=17 /FEA=EST /TIER=ConsEnd /STK=0 /UG=Xl.6425 /UG_TITLE=ESTs, Moderately similar to STAU_HUMAN Double-stranded RNA-binding protein Staufen homolog (H.sapiens)
Xl.24805.1.S1_at	4.74749	4.14654	4.14654	8.23315	8.06481	8.83745	7.37815	4.34685	8.12839	-3.78154	-10.7863	3.11873e-06	6.19288e-05	5.17252	gb:BQ734145 /DB_XREF=gi:21873042 /DB_XREF=AGENCOURT_8216277 /CLONE=IMAGE:4683677 /TID=Xl.24805.1 /CNT=45 /FEA=EST /TIER=Stack /STK=9 /UG=Xl.24805 /UG_TITLE=ESTs, Moderately similar to NOG1_HUMAN Nucleolar GTP-binding protein 1 (Chronic renal failure gene protein) (GTP-binding protein NGB) (H.sapiens)
Xl.17437.1.S1_at	3.06606	3.76008	3.76008	7.08513	7.06634	7.46874	7.6183	3.52874	7.30963	-3.78089	-14.3108	3.19696e-07	1.50468e-05	7.47813	gb:AB083247.1 /DB_XREF=gi:20126692 /GEN=x-kf-1b /TID=Xl.17437.1 /CNT=6 /FEA=FLmRNA /TIER=FL /STK=1 /UG=Xl.17437 /DEF=Xenopus laevis x-kf-1b mRNA for KF-1b, complete cds. /PROD=KF-1b /FL=gb:AB083247.1
Xl.5774.2.S1_at	2.25577	2.7814	2.7814	6.84646	6.35934	5.12845	7.20479	2.60619	6.38476	-3.77857	-8.15954	2.73539e-05	0.000250726	2.89978	gb:CA981087 /DB_XREF=gi:27513741 /DB_XREF=AGENCOURT_11278216 /CLONE=IMAGE:6867438 /TID=Xl.5774.2 /CNT=7 /FEA=EST /TIER=ConsEnd /STK=0 /UG=Xl.5774 /UG_TITLE=ESTs, Moderately similar to vaccinia related kinase 1; Vaccinia-related kinase-1 (Homo sapiens) (H.sapiens)
Xl.2590.1.S1_at	6.89085	6.18023	6.18023	10.6937	10.5191	9.53443	10.0287	6.4171	10.194	-3.7769	-11.3162	2.12886e-06	4.82022e-05	5.56586	gb:BG160046 /DB_XREF=gi:12693956 /DB_XREF=df30c04.y1 /CLONE=IMAGE:3580014 /TID=Xl.2590.1 /CNT=18 /FEA=EST /TIER=ConsEnd /STK=0 /UG=Xl.2590 /UG_TITLE=ESTs, Moderately similar to MUM2 protein (Homo sapiens) (H.sapiens)
Xl.6721.1.A1_at	4.04701	3.91335	3.91335	7.8905	7.92112	7.46048	7.66521	3.9579	7.73433	-3.77643	-18.3849	4.07974e-08	5.67428e-06	9.44912	gb:BJ097325 /DB_XREF=gi:17598628 /DB_XREF=BJ097325 /CLONE=XL141c23 /TID=Xl.6721.1 /CNT=9 /FEA=EST /TIER=Stack /STK=7 /UG=Xl.6721 /UG_TITLE=ESTs, Moderately similar to core-binding factor, beta subunit, isoform 1; polyomavirus enhancer binding protein 2, beta subunit; SL3-3 enhancer factor 1 beta subunit; SL3AKV core-binding factor beta subunit (Homo sapiens) (H.sapiens)
Xl.3393.1.S1_at	4.55559	4.45702	4.45702	8.04113	8.75888	8.2655	7.96882	4.48987	8.25858	-3.76871	-15.5757	1.59922e-07	1.08042e-05	8.15567	gb:AJ243591.1 /DB_XREF=gi:5459449 /GEN=hnRNP-E2 /TID=Xl.3393.1 /CNT=37 /FEA=mRNA /TIER=ConsEnd /STK=0 /UG=Xl.3393 /DEF=Xenopus laevis mRNA for hnRNP-E2 protein. /PROD=hnRNP-E2 protein
Xl.25718.1.A1_at	5.9487	5.29568	5.29568	9.36656	9.78871	9.63956	8.30876	5.51335	9.2759	-3.76255	-9.92501	6.01741e-06	9.41645e-05	4.49042	gb:BJ085317 /DB_XREF=gi:17581264 /DB_XREF=BJ085317 /CLONE=XL105i12 /TID=Xl.25718.1 /CNT=9 /FEA=EST /TIER=Stack /STK=6 /UG=Xl.25718 /UG_TITLE=ESTs, Weakly similar to C1O8_HUMAN Protein C1orf8 precursor (Liver membrane-bound protein) (HSPC001) (H.sapiens)
Xl.14707.1.A1_s_at	6.06031	5.37754	5.37754	9.9053	9.17572	9.24164	9.13686	5.60513	9.36488	-3.75975	-13.255	5.96208e-07	2.15979e-05	6.85804	gb:BM179033 /DB_XREF=gi:17403104 /DB_XREF=dai13d10.x1 /CLONE=IMAGE:4959402 /TID=Xl.14707.1 /CNT=3 /FEA=EST /TIER=ConsEnd /STK=1 /UG=Xl.14707 /UG_TITLE=ESTs
Xl.7994.1.A1_at	2.82319	2.7814	2.7814	6.97561	6.94785	7.65223	4.62657	2.79533	6.55057	-3.75524	-5.98116	0.000265236	0.00112698	0.484778	gb:BJ090136 /DB_XREF=gi:17588217 /DB_XREF=BJ090136 /CLONE=XL101n04 /TID=Xl.7994.1 /CNT=5 /FEA=EST /TIER=ConsEnd /STK=4 /UG=Xl.7994 /UG_TITLE=ESTs, Weakly similar to DYH9_HUMAN Ciliary dynein heavy chain (Axonemal dynein heavy chain) (Dynein heavy chain 9) (H.sapiens)
Xl.24451.1.S1_at	6.01597	5.50513	5.50513	9.46383	9.70898	9.57388	8.95151	5.67541	9.42455	-3.74914	-14.5457	2.7993e-07	1.42256e-05	7.60906	gb:BI445719 /DB_XREF=gi:15270426 /DB_XREF=dae57h07.x3 /CLONE=IMAGE:4678500 /TID=Xl.24451.1 /CNT=31 /FEA=EST /TIER=ConsEnd /STK=5 /UG=Xl.24451 /UG_TITLE=ESTs, Moderately similar to RED protein; RD element; prer protein; IK factor; chondrosarcoma-associated protein 2; IK cytokine (Homo sapiens) (H.sapiens)
Xl.14492.1.A1_at	4.99374	4.42902	4.42902	7.7722	8.34769	8.56078	8.78206	4.61726	8.36568	-3.74843	-12.8315	7.75458e-07	2.56661e-05	6.59382	gb:BJ056488 /DB_XREF=gi:17469466 /DB_XREF=BJ056488 /CLONE=XL032a03 /TID=Xl.14492.1 /CNT=2 /FEA=EST /TIER=ConsEnd /STK=2 /UG=Xl.14492 /UG_TITLE=ESTs
Xl.4452.1.S1_at	2.71064	2.56984	2.56984	6.07571	6.15076	6.43273	6.8014	2.61677	6.36515	-3.74838	-15.9715	1.30156e-07	1.00254e-05	8.35451	gb:BE678667 /DB_XREF=gi:10060572 /DB_XREF=df61c09.x1 /CLONE=IMAGE:3743824 /TID=Xl.4452.1 /CNT=2 /FEA=EST /TIER=ConsEnd /STK=1 /UG=Xl.4452 /UG_TITLE=ESTs
Xl.3679.1.S1_at	4.24294	3.39288	3.39288	7.56719	6.46045	7.98017	7.67442	3.67623	7.42056	-3.74432	-9.47706	8.63744e-06	0.000117816	4.11289	gb:BQ386702 /DB_XREF=gi:21074389 /DB_XREF=NISC_mn19g02.x1 /CLONE=IMAGE:5073986 /TID=Xl.3679.1 /CNT=6 /FEA=EST /TIER=ConsEnd /STK=0 /UG=Xl.3679 /UG_TITLE=ESTs, Moderately similar to T08802 hypothetical protein DKFZp586D0623.1 - human (fragment) (H.sapiens)
Xl.13328.1.A1_at	4.86022	4.26223	4.26223	8.2132	8.31164	8.55615	7.74146	4.46156	8.20561	-3.74405	-13.9211	4.00319e-07	1.69032e-05	7.25545	gb:BE491044 /DB_XREF=gi:9610577 /DB_XREF=db41h09.x1 /CLONE=IMAGE:3301121 /TID=Xl.13328.1 /CNT=2 /FEA=EST /TIER=ConsEnd /STK=1 /UG=Xl.13328 /UG_TITLE=ESTs, Weakly similar to interleukin-1 receptor associated kinase 4 (Homo sapiens) (H.sapiens)
Xl.550.1.S1_at	6.89085	6.07208	6.07208	9.97805	8.9171	10.247	11.1831	6.34501	10.0813	-3.73629	-7.58862	4.72554e-05	0.000358473	2.32068	gb:BQ385341 /DB_XREF=gi:21073028 /DB_XREF=NISC_mn11g05.y1 /CLONE=IMAGE:5073224 /TID=Xl.550.1 /CNT=10 /FEA=mRNA /TIER=ConsEnd /STK=0 /UG=Xl.550 /UG_TITLE=X.laevis calmodulin gene, mRNA, clone 71
Xl.4624.1.A1_a_at	5.56808	5.02269	5.02269	8.64447	8.50223	8.93069	9.67682	5.20449	8.93855	-3.73406	-11.6836	1.64876e-06	4.22247e-05	5.82778	gb:AF358133.1 /DB_XREF=gi:13898896 /GEN=XBP /TID=Xl.4624.1 /CNT=20 /FEA=FLmRNA /TIER=FL+Stack /STK=12 /UG=Xl.4624 /DEF=Xenopus laevis X-box binding protein (XBP) mRNA, complete cds. /PROD=X-box binding protein /FL=gb:AF358133.1
Xl.9203.1.A1_at	5.19822	5.43251	5.43251	9.47128	9.36871	9.30553	8.16027	5.35441	9.07645	-3.72204	-11.0993	2.4842e-06	5.34059e-05	5.40713	gb:BG413726 /DB_XREF=gi:13319279 /DB_XREF=de71a08.x1 /CLONE=IMAGE:3516974 /TID=Xl.9203.1 /CNT=1 /FEA=EST /TIER=ConsEnd /STK=1 /UG=Xl.9203 /UG_TITLE=ESTs, Moderately similar to thioredoxin-like; thioredoxin-like 2; PKC-interacting cousin of thioredoxin (Homo sapiens) (H.sapiens)
Xl.8349.1.S1_at	4.69287	5.94425	5.94425	10.1097	9.18244	8.84262	8.84682	5.52712	9.2454	-3.71828	-8.82019	1.5076e-05	0.000169752	3.52829	gb:AW148136 /DB_XREF=gi:6196032 /DB_XREF=da04e10.x1 /CLONE=XENOPUS_SOURCE_ID:xlnoc001o19 /TID=Xl.8349.1 /CNT=14 /FEA=EST /TIER=Stack /STK=6 /UG=Xl.8349 /UG_TITLE=ESTs, Moderately similar to lipoic acid synthetase (Mus musculus) (M.musculus)
Xl.10826.1.A1_at	3.39916	4.22608	4.22608	8.07885	7.40981	7.48958	7.68633	3.95044	7.66614	-3.7157	-13.0016	6.97112e-07	2.38995e-05	6.70106	gb:CB560349 /DB_XREF=gi:29479879 /DB_XREF=AGENCOURT_13327219 /CLONE=IMAGE:6880689 /TID=Xl.10826.1 /CNT=4 /FEA=EST /TIER=ConsEnd /STK=3 /UG=Xl.10826 /UG_TITLE=ESTs, Moderately similar to AAKG_HUMAN 5-AMP-activated protein kinase, gamma-1 subunit (AMPK gamma-1 chain) (AMPKg) (H.sapiens)
Xl.1271.1.S1_at	5.08883	5.64483	5.64483	9.25707	9.51373	9.09017	8.82296	5.4595	9.17098	-3.71149	-14.739	2.51308e-07	1.31194e-05	7.71504	gb:Z12139.1 /DB_XREF=gi:64967 /GEN=PARP /TID=Xl.1271.1 /CNT=24 /FEA=mRNA /TIER=ConsEnd /STK=0 /UG=Xl.1271 /DEF=X.laevis PARP gene encoding poly(ADP-ribose) polymerase. /PROD=NAD(+) ADP-ribosyltransferase
Xl.22046.1.A1_at	4.65876	4.6692	4.6692	8.44858	8.55509	8.34979	8.14483	4.66572	8.37457	-3.70885	-19.0024	3.10376e-08	4.95092e-06	9.70019	gb:BG020104 /DB_XREF=gi:12476183 /DB_XREF=dc71a02.x1 /CLONE=IMAGE:3402506 /TID=Xl.22046.1 /CNT=22 /FEA=mRNA /TIER=Stack /STK=10 /UG=Xl.22046 /UG_TITLE=Xenopus laevis mRNA for alpha-tubulin
Xl.5534.1.S1_at	3.40603	4.83035	4.83035	8.43888	8.18831	7.71812	7.90942	4.35557	8.06368	-3.70811	-9.71431	7.11998e-06	0.000103773	4.31488	gb:BJ092729 /DB_XREF=gi:17591974 /DB_XREF=BJ092729 /CLONE=XL057d15 /TID=Xl.5534.1 /CNT=30 /FEA=mRNA /TIER=Stack /STK=7 /UG=Xl.5534 /UG_TITLE=Xenopus laevis, Similar to chromosome 20 open reading frame 43, clone IMAGE:4884443, mRNA, partial cds
Xl.24816.1.S1_at	4.31159	4.44402	4.44402	8.23167	8.13791	8.76034	7.28203	4.39988	8.10299	-3.70311	-11.1606	2.37753e-06	5.17158e-05	5.4523	gb:BG160892 /DB_XREF=gi:12694811 /DB_XREF=de37f01.x1 /CLONE=IMAGE:3474168 /TID=Xl.24816.1 /CNT=15 /FEA=EST /TIER=ConsEnd /STK=2 /UG=Xl.24816 /UG_TITLE=ESTs, Weakly similar to S44358 glutathione transferase (EC 2.5.1.18) theta-1 (validated) - human (H.sapiens)
Xl.12355.1.S1_s_at	5.67284	6.07208	6.07208	9.65766	10.0807	10.2869	8.53464	5.939	9.63997	-3.70097	-9.09342	1.19096e-05	0.000145978	3.77612	gb:BC043761.1 /DB_XREF=gi:27696855 /TID=Xl.12355.1 /CNT=7 /FEA=FLmRNA /TIER=FL /STK=2 /UG=Xl.12355 /DEF=Xenopus laevis, Similar to hypothetical protein FLJ10842, clone MGC:52920 IMAGE:4889645, mRNA, complete cds. /PROD=Similar to hypothetical protein FLJ10842 /FL=gb:BC043761.1
Xl.6052.1.S1_at	5.46719	4.52104	4.52104	8.08151	7.74565	8.86274	9.45865	4.83642	8.53714	-3.70072	-8.35201	2.29055e-05	0.000223646	3.08733	gb:BC045017.1 /DB_XREF=gi:28277292 /TID=Xl.6052.1 /CNT=25 /FEA=FLmRNA /TIER=FL+Stack /STK=7 /UG=Xl.6052 /DEF=Xenopus laevis, Similar to RIKEN cDNA 3732409C05 gene, clone MGC:53145 IMAGE:5542693, mRNA, complete cds. /PROD=Similar to RIKEN cDNA 3732409C05 gene /FL=gb:BC045017.1
Xl.8821.1.A1_at	3.56739	4.03311	4.03311	7.39957	7.02069	7.97119	7.90134	3.87787	7.5732	-3.69533	-12.8086	7.86726e-07	2.58322e-05	6.57928	gb:BJ077414 /DB_XREF=gi:17522330 /DB_XREF=BJ077414 /CLONE=XL060o24 /TID=Xl.8821.1 /CNT=4 /FEA=EST /TIER=ConsEnd /STK=3 /UG=Xl.8821 /UG_TITLE=ESTs
Xl.4856.1.S1_at	6.64487	6.33568	6.33568	10.3977	9.62796	10.1983	10.2982	6.43874	10.1305	-3.69178	-14.9757	2.2062e-07	1.21236e-05	7.84258	gb:BM192065 /DB_XREF=gi:17528028 /DB_XREF=dai24a01.x1 /CLONE=IMAGE:4960033 /TID=Xl.4856.1 /CNT=24 /FEA=mRNA /TIER=Stack /STK=10 /UG=Xl.4856 /UG_TITLE=Xenopus laevis, Similar to chaperonin subunit 7 (eta), clone IMAGE:4682624, mRNA, partial cds
Xl.16455.1.S1_at	3.67066	4.28697	4.28697	7.99604	7.81977	7.81346	7.4615	4.08154	7.77269	-3.69116	-15.1156	2.04455e-07	1.19175e-05	7.91689	gb:AY168014.1 /DB_XREF=gi:27368040 /TID=Xl.16455.1 /CNT=7 /FEA=FLmRNA /TIER=FL /STK=1 /UG=Xl.16455 /DEF=Xenopus laevis kinetochore spindle checkpoint protein Nuf2 mRNA, complete cds. /PROD=kinetochore spindle checkpoint protein Nuf2 /FL=gb:AY168014.1
Xl.9816.1.A1_at	4.89096	5.00048	5.00048	9.13694	8.57249	8.28451	8.62605	4.96397	8.655	-3.69102	-15.2808	1.87039e-07	1.1306e-05	8.00363	gb:BG018014 /DB_XREF=gi:12472811 /DB_XREF=df96b10.x1 /CLONE=IMAGE:3747042 /TID=Xl.9816.1 /CNT=2 /FEA=EST /TIER=ConsEnd /STK=2 /UG=Xl.9816 /UG_TITLE=ESTs, Weakly similar to fatty acid hydroxylase (Homo sapiens) (H.sapiens)
Xl.25717.1.A1_at	8.08455	7.72681	7.72681	11.0588	11.1704	11.9714	11.9162	7.84605	11.5292	-3.68314	-12.5872	9.05735e-07	2.84996e-05	6.43704	gb:BE026677 /DB_XREF=gi:8320038 /DB_XREF=db29h08.x1 /CLONE=XENOPUS_SOURCE_ID: /TID=Xl.25717.1 /CNT=3 /FEA=EST /TIER=ConsEnd /STK=1 /UG=Xl.25717 /UG_TITLE=ESTs
Xl.6781.1.S1_at	4.2644	2.92877	2.92877	7.28737	6.85785	7.71884	6.35609	3.37398	7.05504	-3.68106	-8.57498	1.87249e-05	0.000197102	3.29997	gb:BC043829.1 /DB_XREF=gi:27694788 /TID=Xl.6781.1 /CNT=18 /FEA=FLmRNA /TIER=FL /STK=4 /UG=Xl.6781 /DEF=Xenopus laevis, Similar to synapse associated protein 1, SAP47 homolog (Drosophila), clone MGC:53226 IMAGE:5543397, mRNA, complete cds. /PROD=Similar to synapse associated protein 1, SAP47homolog (Drosophila) /FL=gb:BC043829.1
Xl.7078.1.S1_at	6.27801	5.98758	5.98758	9.92622	10.0598	9.7536	9.29006	6.08439	9.75743	-3.67304	-15.122	2.03742e-07	1.19175e-05	7.9203	gb:BJ081341 /DB_XREF=gi:17575474 /DB_XREF=BJ081341 /CLONE=XL071f08 /TID=Xl.7078.1 /CNT=68 /FEA=FLmRNA /TIER=Stack /STK=6 /UG=Xl.7078 /UG_TITLE=S-adenosylmethionine decarboxylase (Xenopus laevis=African clawed frogs, tailbud, mRNA Partial, 1030 nt) /FL=gb:BC042281.1
Xl.11683.1.A1_at	3.80261	4.21323	4.21323	8.19974	7.88925	7.4058	7.47601	4.07636	7.7427	-3.66634	-14.044	3.72691e-07	1.60916e-05	7.3264	gb:BJ056253 /DB_XREF=gi:17423764 /DB_XREF=BJ056253 /CLONE=XL035d22 /TID=Xl.11683.1 /CNT=2 /FEA=EST /TIER=ConsEnd /STK=2 /UG=Xl.11683 /UG_TITLE=ESTs, Moderately similar to 2115400A transcription factor IID:SUBUNIT=32kD (Homo sapiens) (H.sapiens)
Xl.1324.1.S1_at	7.31671	6.51334	6.51334	10.5603	10.688	10.1662	10.3561	6.78113	10.4427	-3.66153	-13.6128	4.80286e-07	1.9021e-05	7.07421	gb:BQ732680 /DB_XREF=gi:21871577 /DB_XREF=AGENCOURT_8148825 /CLONE=IMAGE:5569811 /TID=Xl.1324.1 /CNT=88 /FEA=mRNA /TIER=Stack /STK=17 /UG=Xl.1324 /UG_TITLE=Xenopus laevis RNA-binding protein XlhnRNPL mRNA, partial cds
Xl.24404.1.S1_at	5.48315	5.69029	5.69029	9.61193	9.06025	9.05592	9.39243	5.62124	9.28013	-3.65889	-16.5262	9.83023e-08	9.07353e-06	8.62342	gb:AW199362 /DB_XREF=gi:6479931 /DB_XREF=da21c09.x1 /CLONE=XENOPUS_SOURCE_ID:xlnga003b17 /TID=Xl.24404.1 /CNT=21 /FEA=EST /TIER=ConsEnd /STK=2 /UG=Xl.24404 /UG_TITLE=ESTs, Moderately similar to S53637 protein kinase clk2, long splice form (EC 2.7.1.-) - human (H.sapiens)
Xl.15316.1.A1_at	5.16593	3.99853	3.99853	8.15053	7.68243	8.36294	7.96908	4.38767	8.04124	-3.65358	-10.9349	2.7975e-06	5.83108e-05	5.28473	gb:BM191783 /DB_XREF=gi:17527746 /DB_XREF=dag36b11.x3 /CLONE=IMAGE:4783437 /TID=Xl.15316.1 /CNT=5 /FEA=EST /TIER=ConsEnd /STK=1 /UG=Xl.15316 /UG_TITLE=ESTs, Moderately similar to 2210321B cyclin G2 (Homo sapiens) (H.sapiens)
Xl.8474.1.S1_at	3.51077	4.70621	4.70621	9.15502	8.92652	6.36099	7.39558	4.30773	7.95953	-3.6518	-5.39198	0.000540347	0.00188318	-0.273547	gb:BC044320.1 /DB_XREF=gi:28278110 /TID=Xl.8474.1 /CNT=68 /FEA=FLmRNA /TIER=FL+Stack /STK=7 /UG=Xl.8474 /DEF=Xenopus laevis, Similar to integral membrane protein 2A, clone MGC:52743 IMAGE:4683927, mRNA, complete cds. /PROD=Similar to integral membrane protein 2A /FL=gb:BC044320.1
Xl.25747.1.S1_at	4.98913	5.51414	5.51414	8.32684	9.08453	9.3963	9.1508	5.33913	8.98962	-3.65048	-12.2664	1.11528e-06	3.29878e-05	6.22616	gb:BJ045370 /DB_XREF=gi:17420123 /DB_XREF=BJ045370 /CLONE=XL003p09 /TID=Xl.25747.1 /CNT=35 /FEA=EST /TIER=Stack /STK=8 /UG=Xl.25747 /UG_TITLE=ESTs, Highly similar to hypothetical protein MGC4549 (Homo sapiens) (H.sapiens)
Xl.2419.1.S1_x_at	6.78246	6.69623	6.69623	10.3312	10.2546	11.1434	9.7681	6.72497	10.3743	-3.64936	-11.5762	1.77531e-06	4.39428e-05	5.75211	gb:BJ090004 /DB_XREF=gi:17588010 /DB_XREF=BJ090004 /CLONE=XL108p04 /TID=Xl.2419.1 /CNT=11 /FEA=EST /TIER=ConsEnd /STK=4 /UG=Xl.2419 /UG_TITLE=ESTs, Moderately similar to hypothetical protein HSPC148 (Homo sapiens) (H.sapiens)
Xl.6176.1.S1_at	6.55601	4.30639	4.30639	8.13747	7.93365	9.15975	9.58205	5.05627	8.70323	-3.64696	-5.80269	0.000327433	0.00130848	0.260223	gb:BJ085948 /DB_XREF=gi:17582156 /DB_XREF=BJ085948 /CLONE=XL051i18 /TID=Xl.6176.1 /CNT=77 /FEA=FLmRNA /TIER=Stack /STK=6 /UG=Xl.6176 /UG_TITLE=Xenopus laevis, Similar to epithelial membrane protein 2, clone MGC:52916 IMAGE:4889583, mRNA, complete cds /FL=gb:BC044968.1
Xl.16556.1.A1_at	5.20919	6.08447	6.08447	9.43959	9.86213	9.55778	8.88637	5.79271	9.43647	-3.64375	-11.4436	1.94672e-06	4.65793e-05	5.65766	gb:BJ055543 /DB_XREF=gi:17468224 /DB_XREF=BJ055543 /CLONE=XL009p06 /TID=Xl.16556.1 /CNT=8 /FEA=EST /TIER=ConsEnd /STK=1 /UG=Xl.16556 /UG_TITLE=ESTs, Moderately similar to lecuine-rich acidic protein-like protein (Homo sapiens) (H.sapiens)
Xl.25540.2.S1_at	2.72922	4.36613	4.36613	6.66145	8.26641	8.00845	6.88581	3.82049	7.45553	-3.63503	-6.78209	0.000108228	0.000606044	1.43985	gb:BG016889 /DB_XREF=gi:12470578 /DB_XREF=df66h08.x1 /CLONE=IMAGE:3744614 /TID=Xl.25540.2 /CNT=11 /FEA=EST /TIER=Stack /STK=7 /UG=Xl.25540 /UG_TITLE=ESTs, Moderately similar to A38219 GAP-associated tyrosine phosphoprotein p62 - human (H.sapiens)
Xl.5975.2.A1_at	5.65009	6.35513	6.35513	9.796	9.77073	9.67753	9.76986	6.12012	9.75353	-3.63342	-15.4653	1.69523e-07	1.10234e-05	8.09916	gb:BJ099236 /DB_XREF=gi:17601444 /DB_XREF=BJ099236 /CLONE=XL149o06 /TID=Xl.5975.2 /CNT=11 /FEA=EST /TIER=Stack /STK=6 /UG=Xl.5975 /UG_TITLE=Xenopus laevis, Similar to signal recognition particle 54 kDa, clone MGC:53033 IMAGE:5537314, mRNA, complete cds
Xl.14257.1.S1_at	6.74359	5.95361	5.95361	9.63087	9.56249	9.70146	10.483	6.21693	9.84446	-3.62753	-11.5503	1.80745e-06	4.43966e-05	5.73373	gb:BG038772 /DB_XREF=gi:12481357 /DB_XREF=dg24h12.x1 /CLONE=IMAGE:3749999 /TID=Xl.14257.1 /CNT=9 /FEA=EST /TIER=ConsEnd /STK=1 /UG=Xl.14257 /UG_TITLE=ESTs, Weakly similar to AD-015 protein (Homo sapiens) (H.sapiens)
Xl.20081.1.S1_a_at	5.25268	5.15371	5.15371	8.73081	9.11944	8.77116	8.61324	5.1867	8.80866	-3.62196	-17.6645	5.67677e-08	6.59371e-06	9.14209	gb:BJ084947 /DB_XREF=gi:17580721 /DB_XREF=BJ084947 /CLONE=XL102a21 /TID=Xl.20081.1 /CNT=4 /FEA=EST /TIER=ConsEnd /STK=4 /UG=Xl.20081 /UG_TITLE=ESTs
Xl.16775.1.S1_at	7.39258	6.29053	6.29053	10.9774	10.2321	10.1986	9.70731	6.65788	10.2789	-3.62098	-9.52921	8.27542e-06	0.000114372	4.1577	gb:BC044708.1 /DB_XREF=gi:27882476 /TID=Xl.16775.1 /CNT=10 /FEA=mRNA /TIER=ConsEnd /STK=2 /UG=Xl.16775 /UG_TITLE=Xenopus laevis, Similar to small androgen receptor-interacting protein, clone IMAGE:5571436, mRNA, partial cds /DEF=Xenopus laevis, Similar to small androgen receptor-interacting protein, clone IMAGE:5571436, mRNA, partial cds.
Xl.26096.2.S1_at	4.92039	3.39066	3.39066	7.96509	7.51553	7.25179	7.34474	3.90057	7.51929	-3.61872	-9.04371	1.24261e-05	0.000150224	3.73154	gb:CB563838 /DB_XREF=gi:29483368 /DB_XREF=AGENCOURT_13351714 /CLONE=IMAGE:6874499 /TID=Xl.26096.2 /CNT=19 /FEA=EST /TIER=ConsEnd /STK=1 /UG=Xl.26096 /UG_TITLE=ESTs, Highly similar to RL27_HUMAN 60S ribosomal protein L27 (H.sapiens)
Xl.21191.1.S1_at	4.04409	3.13205	3.13205	6.97627	7.64589	7.73488	5.8616	3.43607	7.05466	-3.6186	-7.635	4.51493e-05	0.000347314	2.36905	gb:BU907952 /DB_XREF=gi:24089866 /DB_XREF=AGENCOURT_10481940 /CLONE=IMAGE:6633264 /TID=Xl.21191.1 /CNT=2 /FEA=EST /TIER=ConsEnd /STK=1 /UG=Xl.21191 /UG_TITLE=ESTs
Xl.7383.1.S1_at	3.65982	2.80949	2.80949	6.92616	6.64647	6.8637	6.40523	3.09293	6.71039	-3.61746	-13.0738	6.66548e-07	2.29889e-05	6.74613	gb:BG513547 /DB_XREF=gi:13484204 /DB_XREF=dac15d08.x2 /CLONE=IMAGE:4407206 /TID=Xl.7383.1 /CNT=10 /FEA=EST /TIER=ConsEnd /STK=0 /UG=Xl.7383 /UG_TITLE=ESTs, Moderately similar to colon cancer-associated protein Mic1 (Homo sapiens) (H.sapiens)
Xl.383.1.S1_at	4.90903	5.4086	5.4086	8.93169	8.79185	8.57331	9.13108	5.24208	8.85698	-3.61491	-15.4613	1.69887e-07	1.10234e-05	8.09708	gb:U44048.1 /DB_XREF=gi:2231170 /TID=Xl.383.1 /CNT=36 /FEA=FLmRNA /TIER=FL+Stack /STK=13 /UG=Xl.383 /DEF=Xenopus laevis MCM5CDC46 mRNA, complete cds. /PROD=MCM5CDC46p /FL=gb:U44048.1 gb:BC047250.1
Xl.17164.1.A1_at	3.15648	2.37317	2.37317	6.88442	5.91891	5.91504	6.27048	2.63427	6.24721	-3.61294	-11.2535	2.22534e-06	4.93925e-05	5.52032	gb:BM261608 /DB_XREF=gi:17924648 /DB_XREF=dai46g06.x1 /CLONE=IMAGE:4964915 /TID=Xl.17164.1 /CNT=2 /FEA=EST /TIER=ConsEnd /STK=2 /UG=Xl.17164 /UG_TITLE=ESTs
Xl.6285.1.S1_at	5.55217	6.86688	6.86688	10.2458	10.5008	9.06914	10.3441	6.42865	10.04	-3.61132	-8.07129	2.97063e-05	0.000264889	2.81252	gb:BC042285.1 /DB_XREF=gi:27503893 /TID=Xl.6285.1 /CNT=7 /FEA=FLmRNA /TIER=FL /STK=3 /UG=Xl.6285 /DEF=Xenopus laevis, Similar to hypothetical protein FLJ10989, clone MGC:53490 IMAGE:5572404, mRNA, complete cds. /PROD=Similar to hypothetical protein FLJ10989 /FL=gb:BC042285.1
Xl.2509.1.S1_a_at	5.39489	5.07398	5.07398	8.88096	7.76582	9.09059	9.42412	5.18095	8.79037	-3.60942	-9.53196	8.25681e-06	0.000114372	4.16005	gb:BG016922 /DB_XREF=gi:12470644 /DB_XREF=df67d04.x1 /CLONE=IMAGE:3744415 /TID=Xl.2509.1 /CNT=4 /FEA=EST /TIER=ConsEnd /STK=2 /UG=Xl.2509 /UG_TITLE=ESTs, Moderately similar to POR3_HUMAN Voltage-dependent anion-selective channel protein 3 (VDAC-3) (hVDAC3) (Outer mitochondrial membrane protein porin 3) (H.sapiens)
Xl.2085.1.A1_at	5.55246	3.57148	3.57148	7.77675	7.20883	8.23368	8.08829	4.23181	7.82689	-3.59508	-7.12152	7.57154e-05	0.000482035	1.81996	gb:BG486717 /DB_XREF=gi:13434294 /DB_XREF=dc95e02.x1 /CLONE=IMAGE:3405002 /TID=Xl.2085.1 /CNT=2 /FEA=EST /TIER=ConsEnd /STK=2 /UG=Xl.2085 /UG_TITLE=ESTs, Highly similar to chromosome 1 open reading frame 28 (Homo sapiens) (H.sapiens)
Xl.1626.1.S1_at	2.87078	3.39066	3.39066	6.44523	6.27154	7.3715	7.15938	3.21737	6.81191	-3.59455	-11.171	2.35993e-06	5.15281e-05	5.45994	gb:BJ092873 /DB_XREF=gi:17592192 /DB_XREF=BJ092873 /CLONE=XL057k22 /TID=Xl.1626.1 /CNT=37 /FEA=FLmRNA /TIER=Stack /STK=10 /UG=Xl.1626 /UG_TITLE=Xenopus laevis, Similar to RAD23 homolog B (S. cerevisiae), clone MGC:53561 IMAGE:4681561, mRNA, complete cds /FL=gb:BC044115.1 gb:BC044089.1
Xl.5906.2.A1_at	3.01245	3.71927	3.71927	7.38905	7.37808	6.86423	6.68015	3.48366	7.07788	-3.59422	-12.5746	9.13087e-07	2.86525e-05	6.42886	gb:BI443283 /DB_XREF=gi:15267990 /DB_XREF=dai89b04.x1 /CLONE=IMAGE:5047614 /TID=Xl.5906.2 /CNT=3 /FEA=EST /TIER=ConsEnd /STK=2 /UG=Xl.5906 /UG_TITLE=ESTs, Weakly similar to Y081_HUMAN Hypothetical protein KIAA0081 (HA1009) (H.sapiens)
Xl.9307.1.A1_at	3.56079	3.70766	3.70766	7.57985	7.33024	7.36295	6.70995	3.6587	7.24575	-3.58704	-14.4397	2.97137e-07	1.44878e-05	7.55032	gb:BJ083634 /DB_XREF=gi:17578794 /DB_XREF=BJ083634 /CLONE=XL085m03 /TID=Xl.9307.1 /CNT=2 /FEA=EST /TIER=ConsEnd /STK=2 /UG=Xl.9307 /UG_TITLE=ESTs
Xl.4779.1.A1_at	3.06606	2.21745	2.21745	6.59516	5.78474	4.90448	7.04949	2.50032	6.08347	-3.58314	-7.17611	7.15719e-05	0.000467112	1.87979	gb:BE505307 /DB_XREF=gi:9708838 /DB_XREF=dc21d10.x1 /CLONE=IMAGE:3397747 /TID=Xl.4779.1 /CNT=9 /FEA=EST /TIER=ConsEnd /STK=1 /UG=Xl.4779 /UG_TITLE=ESTs, Moderately similar to T08776 hypothetical protein DKFZp586D0920.1 - human (fragment) (H.sapiens)
Xl.4567.1.S1_at	6.37227	6.71082	6.71082	9.88298	10.18	10.4189	10.2369	6.59797	10.1797	-3.58173	-16.4695	1.01124e-07	9.07353e-06	8.59642	gb:BC041534.1 /DB_XREF=gi:27370981 /TID=Xl.4567.1 /CNT=44 /FEA=FLmRNA /TIER=FL+Stack /STK=18 /UG=Xl.4567 /DEF=Xenopus laevis, Similar to heterogeneous nuclear ribonucleoprotein C (C1C2), clone MGC:53243 IMAGE:5543574, mRNA, complete cds. /PROD=Similar to heterogeneous nuclearribonucleoprotein C (C1C2) /FL=gb:BC041534.1
Xl.23910.1.S1_at	6.46323	5.21388	5.21388	9.72754	9.3714	8.88229	8.86185	5.63033	9.21077	-3.58044	-9.58365	7.91538e-06	0.000111135	4.20422	gb:AW637817 /DB_XREF=gi:7394945 /DB_XREF=bl62h05.w1 /CLONE=PBX0062H05 /TID=Xl.23910.1 /CNT=8 /FEA=EST /TIER=ConsEnd /STK=0 /UG=Xl.23910 /UG_TITLE=ESTs, Weakly similar to ATP synthase, H+ transporting, mitochondrial F0 complex, subunit f, isoform 2; F1Fo-ATPase synthase f subunit (Homo sapiens) (H.sapiens)
Xl.8805.1.S1_at	2.60879	2.31869	2.31869	6.57757	4.83699	6.20406	6.35517	2.41539	5.99345	-3.57806	-8.84905	1.4701e-05	0.000167169	3.55479	gb:CB564916 /DB_XREF=gi:29484446 /DB_XREF=AGENCOURT_13318871 /CLONE=IMAGE:6873424 /TID=Xl.8805.1 /CNT=119 /FEA=mRNA /TIER=Stack /STK=8 /UG=Xl.8805 /UG_TITLE=Fragment of Xenopus laevis mRNA for ribosomal protein L1
Xl.5178.2.A1_x_at	7.31072	6.84913	6.84913	11.0448	10.4099	10.3277	10.5124	7.003	10.5737	-3.57073	-14.2072	3.39201e-07	1.55384e-05	7.41962	gb:BF232507 /DB_XREF=gi:11175220 /DB_XREF=de30a10.x1 /CLONE=IMAGE:3473179 /TID=Xl.5178.2 /CNT=13 /FEA=EST /TIER=Stack /STK=7 /UG=Xl.5178 /UG_TITLE=Xenopus laevis, Similar to actin related protein 23 complex, subunit 1A, 41kDa, clone MGC:52839 IMAGE:4885217, mRNA, complete cds
Xl.1352.1.S1_at	4.88679	5.74935	5.74935	9.19874	8.75165	9.0403	9.13448	5.46183	9.03129	-3.56946	-13.1167	6.49067e-07	2.27876e-05	6.77282	gb:M63705.1 /DB_XREF=gi:214914 /GEN=xnf7 /TID=Xl.1352.1 /CNT=35 /FEA=FLmRNA /TIER=FL+Stack /STK=11 /UG=Xl.1352 /UG_TITLE=X.laeivs xnf7 protein mRNA, complete cds /DEF=X.laeivs xnf7 protein mRNA, complete cds. /FL=gb:M63705.1
Xl.4227.1.S1_at	3.99584	3.56207	3.56207	7.94491	6.95248	7.53203	6.65884	3.70666	7.27206	-3.5654	-10.7849	3.12205e-06	6.19288e-05	5.17141	gb:BJ083419 /DB_XREF=gi:17578480 /DB_XREF=BJ083419 /CLONE=XL085b24 /TID=Xl.4227.1 /CNT=33 /FEA=mRNA /TIER=Stack /STK=9 /UG=Xl.4227 /UG_TITLE=X. laevis Eg1 mRNA for serinethreonine kinase (cdc2) homologue
Xl.6475.1.A1_at	3.44699	4.9313	4.9313	7.49095	7.79255	8.62766	8.09278	4.43653	8.00099	-3.56446	-8.3627	2.26831e-05	0.000222511	3.09763	gb:CD361233 /DB_XREF=gi:31132644 /DB_XREF=AGENCOURT_14239696 /CLONE=IMAGE:6957613 /TID=Xl.6475.1 /CNT=19 /FEA=EST /TIER=Stack /STK=6 /UG=Xl.6475 /UG_TITLE=ESTs, Weakly similar to ATPase membrane sector associated protein M8-9; ATPase, H+ transporting, lysosomal (vacuolar proton pump) membrane sector associated protein M8-9; vacuolar ATP synthase membrane sector associated protein M8-9; V-ATPase M…
Xl.1245.1.S1_at	4.78156	4.44402	4.44402	7.91831	8.1034	8.93595	7.51305	4.55653	8.11768	-3.56115	-10.681	3.37122e-06	6.49638e-05	5.09204	gb:X80751.1 /DB_XREF=gi:557679 /TID=Xl.1245.1 /CNT=15 /FEA=mRNA /TIER=ConsEnd /STK=0 /UG=Xl.1245 /DEF=X.laevis MPK2 mRNA. /PROD=MAP kinase
Xl.26071.1.S1_at	5.3758	5.86382	5.86382	9.18393	9.43436	9.34846	9.0803	5.70115	9.26176	-3.56062	-16.253	1.12748e-07	9.60601e-06	8.49237	gb:CB564052 /DB_XREF=gi:29483582 /DB_XREF=AGENCOURT_13351904 /CLONE=IMAGE:6872975 /TID=Xl.26071.1 /CNT=31 /FEA=EST /TIER=Stack /STK=6 /UG=Xl.26071 /UG_TITLE=ESTs, Moderately similar to S60335 TGF-beta receptor interacting protein 1 - human (H.sapiens)
Xl.8589.2.A1_at	3.58011	3.63992	3.63992	8.64239	8.18151	5.49308	6.40523	3.61999	7.18055	-3.56056	-5.10612	0.000776348	0.00246649	-0.659326	gb:BI446732 /DB_XREF=gi:15271439 /DB_XREF=daa87b01.x3 /CLONE=IMAGE:4084176 /TID=Xl.8589.2 /CNT=32 /FEA=EST /TIER=Stack /STK=14 /UG=Xl.8589 /UG_TITLE=Xenopus laevis beta 5 tubulin mRNA, complete cds
Xl.929.1.S2_at	4.99978	3.48167	3.48167	7.38729	7.78248	7.8309	7.19121	3.9877	7.54797	-3.56027	-8.96785	1.32626e-05	0.000156709	3.66307	gb:BJ056367 /DB_XREF=gi:17469337 /DB_XREF=BJ056367 /CLONE=XL035j18 /TID=Xl.929.1 /CNT=11 /FEA=FLmRNA /TIER=ConsEnd /STK=2 /UG=Xl.929 /UG_TITLE=Xenopus laevis poly(A) polymerase (PAP) gene, complete cds /FL=gb:U19974.1
Xl.1250.1.S1_at	5.64452	5.63574	5.63574	9.20234	9.23586	8.89314	9.45611	5.63867	9.19687	-3.5582	-17.1813	7.13683e-08	7.81934e-06	8.92711	gb:BI448124 /DB_XREF=gi:15272831 /DB_XREF=dac71c06.x1 /CLONE=IMAGE:4435570 /TID=Xl.1250.1 /CNT=38 /FEA=mRNA /TIER=Stack /STK=9 /UG=Xl.1250 /UG_TITLE=X.laevis mRNA for nuclear actin-binding protein chain a
Xl.22259.1.A1_a_at	7.03887	6.12852	6.12852	10.3535	9.91497	10.1178	9.5735	6.43197	9.98993	-3.55796	-11.7003	1.63008e-06	4.21655e-05	5.83943	gb:CB563791 /DB_XREF=gi:29483321 /DB_XREF=AGENCOURT_13343463 /CLONE=IMAGE:6876385 /TID=Xl.22259.1 /CNT=2 /FEA=EST /TIER=ConsEnd /STK=1 /UG=Xl.22259 /UG_TITLE=ESTs
Xl.406.1.S1_a_at	5.82839	5.38164	5.38164	9.25569	9.10806	9.45879	8.52919	5.53056	9.08793	-3.55737	-13.0823	6.63044e-07	2.29369e-05	6.75142	gb:AF117816.1 /DB_XREF=gi:6002691 /TID=Xl.406.1 /CNT=10 /FEA=FLmRNA /TIER=FL /STK=4 /UG=Xl.406 /DEF=Xenopus laevis Chk1 checkpoint kinase mRNA, complete cds. /PROD=Chk1 checkpoint kinase /FL=gb:AF117816.1
Xl.13909.1.A1_at	5.88052	5.65725	5.65725	9.55439	9.60927	8.55588	9.4272	5.73167	9.28669	-3.55502	-12.2379	1.13631e-06	3.30392e-05	6.20719	gb:BJ077419 /DB_XREF=gi:17522335 /DB_XREF=BJ077419 /CLONE=XL060p05 /TID=Xl.13909.1 /CNT=4 /FEA=EST /TIER=ConsEnd /STK=3 /UG=Xl.13909 /UG_TITLE=ESTs, Weakly similar to KIP1_HUMAN DNA-PKcs interacting protein (Kinase interacting protein) (KIP) (Calcium and integrin-binding protein) (CIB) (SNK interacting protein 2-28) (SIP2-28) (H.sapiens)
Xl.2819.1.A1_at	4.05551	5.93663	5.93663	8.95973	9.27105	8.93775	8.26809	5.30959	8.85916	-3.54957	-7.37916	5.82159e-05	0.000412996	2.09926	gb:BI449434 /DB_XREF=gi:15274141 /DB_XREF=de28d05.x3 /CLONE=IMAGE:3472953 /TID=Xl.2819.1 /CNT=4 /FEA=EST /TIER=ConsEnd /STK=3 /UG=Xl.2819 /UG_TITLE=ESTs
Xl.12917.1.A1_at	3.47496	4.61615	4.61615	7.7815	7.8997	7.83664	7.62253	4.23575	7.78509	-3.54934	-11.5418	1.81813e-06	4.45229e-05	5.7277	gb:BJ092611 /DB_XREF=gi:17591805 /DB_XREF=BJ092611 /CLONE=XL087n21 /TID=Xl.12917.1 /CNT=2 /FEA=EST /TIER=ConsEnd /STK=2 /UG=Xl.12917 /UG_TITLE=ESTs
Xl.14073.1.A1_at	4.31159	3.92206	3.92206	7.05709	6.745	8.05113	8.54891	4.0519	7.60053	-3.54863	-8.23637	2.54728e-05	0.000239799	2.9751	gb:BJ079089 /DB_XREF=gi:17524005 /DB_XREF=BJ079089 /CLONE=XL067c18 /TID=Xl.14073.1 /CNT=3 /FEA=EST /TIER=ConsEnd /STK=1 /UG=Xl.14073 /UG_TITLE=ESTs
Xl.10244.1.A1_at	5.88077	5.49508	5.49508	9.9839	8.64239	8.91283	9.14373	5.62364	9.17071	-3.54707	-10.7879	3.11519e-06	6.19288e-05	5.17369	gb:BJ098385 /DB_XREF=gi:17600176 /DB_XREF=BJ098385 /CLONE=XL146f20 /TID=Xl.10244.1 /CNT=4 /FEA=EST /TIER=ConsEnd /STK=2 /UG=Xl.10244 /UG_TITLE=ESTs, Moderately similar to TD52_HUMAN Tumor protein D52 (N8 protein) (H.sapiens)
Xl.536.1.S1_at	2.67758	2.50981	2.50981	6.5792	6.0819	5.59061	6.17884	2.56573	6.10764	-3.54191	-13.659	4.67264e-07	1.87175e-05	7.10162	gb:M19032.1 /DB_XREF=gi:214014 /TID=Xl.536.1 /CNT=6 /FEA=FLmRNA /TIER=FL /STK=2 /UG=Xl.536 /UG_TITLE=X.laevis alpha-amidating enzyme (AE-II) gene, complete cds /DEF=X.laevis alpha-amidating enzyme (AE-II) gene, complete cds. /FL=gb:M19032.1
Xl.14922.1.A1_at	6.33019	6.54752	6.54752	10.251	9.86756	9.94074	9.98094	6.47507	10.01	-3.53497	-17.7313	5.50271e-08	6.58319e-06	9.1712	gb:BM180918 /DB_XREF=gi:17404989 /DB_XREF=daj83a05.x1 /CLONE=IMAGE:5129361 /TID=Xl.14922.1 /CNT=3 /FEA=EST /TIER=ConsEnd /STK=3 /UG=Xl.14922 /UG_TITLE=ESTs, Moderately similar to T46490 hypothetical protein DKFZp434K046.1 - human (H.sapiens)
Xl.5373.1.A1_at	3.74621	4.14503	4.14503	6.98533	7.14182	7.81281	8.23594	4.01209	7.54397	-3.53188	-10.66	3.42442e-06	6.55776e-05	5.07585	gb:BE575591 /DB_XREF=gi:9825390 /DB_XREF=dc59c11.x1 /CLONE=IMAGE:3401396 /TID=Xl.5373.1 /CNT=2 /FEA=EST /TIER=ConsEnd /STK=1 /UG=Xl.5373 /UG_TITLE=ESTs, Weakly similar to T02245 hypothetical protein P1.11659_3 - human (H.sapiens)
Xl.25219.1.A1_at	3.60672	4.11408	4.11408	7.72271	7.01788	7.1446	8.01987	3.94496	7.47627	-3.53131	-11.754	1.5713e-06	4.08484e-05	5.87698	gb:BG554586 /DB_XREF=gi:13566366 /DB_XREF=de96d12.x2 /CLONE=IMAGE:3549383 /TID=Xl.25219.1 /CNT=5 /FEA=EST /TIER=ConsEnd /STK=2 /UG=Xl.25219 /UG_TITLE=ESTs
Xl.22668.1.A1_at	3.83844	2.99108	2.99108	7.20467	5.99571	6.51069	7.5022	3.27353	6.80332	-3.52978	-8.8115	1.51908e-05	0.000170711	3.5203	gb:BG556031 /DB_XREF=gi:13567811 /DB_XREF=df25f03.x1 /CLONE=IMAGE:3558293 /TID=Xl.22668.1 /CNT=11 /FEA=EST /TIER=Stack /STK=6 /UG=Xl.22668 /UG_TITLE=ESTs, Moderately similar to ROH1_HUMAN Heterogeneous nuclear ribonucleoprotein H (hnRNP H) (H.sapiens)
Xl.3834.2.A1_at	2.84587	3.63992	3.63992	6.56422	7.25679	7.67773	6.11766	3.37524	6.9041	-3.52886	-8.78808	1.55055e-05	0.000172727	3.49872	gb:BJ048846 /DB_XREF=gi:17409262 /DB_XREF=BJ048846 /CLONE=XL022d12 /TID=Xl.3834.2 /CNT=3 /FEA=EST /TIER=ConsEnd /STK=2 /UG=Xl.3834 /UG_TITLE=ESTs, Moderately similar to bromodomain containing protein 3; bromodomain-containing 3; RING3-like gene; open reading frame X (Homo sapiens) (H.sapiens)
Xl.4830.1.A1_at	4.11408	3.15648	3.15648	6.79306	7.00157	7.6373	6.56904	3.47568	7.00024	-3.52457	-10.2729	4.58798e-06	7.95966e-05	4.77262	gb:BJ057247 /DB_XREF=gi:17470020 /DB_XREF=BJ057247 /CLONE=XL034h11 /TID=Xl.4830.1 /CNT=13 /FEA=EST /TIER=Stack /STK=11 /UG=Xl.4830 /UG_TITLE=ESTs, Moderately similar to I54378 gene X104 protein - human (H.sapiens)
Xl.3871.1.S1_at	8.53647	7.25287	7.25287	11.3708	10.4005	11.3156	11.7272	7.68074	11.2035	-3.52277	-8.45224	2.09106e-05	0.000213284	3.18352	gb:BF615787 /DB_XREF=gi:11789736 /DB_XREF=de19d04.y1 /CLONE=IMAGE:3438390 /TID=Xl.3871.1 /CNT=4 /FEA=EST /TIER=ConsEnd /STK=0 /UG=Xl.3871 /UG_TITLE=ESTs, Weakly similar to AT92_HUMAN ATP synthase lipid-binding protein, mitochondrial precursor (ATP synthase proteolipid P2) (ATPase protein 9) (ATPase subunit C) (H.sapiens)
Xl.5269.1.S1_at	6.36552	6.86688	6.86688	10.4193	10.5954	9.47688	10.3882	6.69976	10.2199	-3.52018	-11.3714	2.04776e-06	4.7492e-05	5.60574	gb:BC044685.1 /DB_XREF=gi:27882414 /TID=Xl.5269.1 /CNT=106 /FEA=FLmRNA /TIER=FL+Stack /STK=44 /UG=Xl.5269 /DEF=Xenopus laevis, clone MGC:53349 IMAGE:5571031, mRNA, complete cds. /PROD=Unknown (protein for MGC:53349) /FL=gb:BC044685.1
Xl.10771.1.A1_at	4.20372	4.24621	4.24621	7.71177	7.97575	7.24894	8.05175	4.23204	7.74705	-3.51501	-14.4623	2.93378e-07	1.44878e-05	7.56286	gb:BE508294 /DB_XREF=gi:9728069 /DB_XREF=dc09e09.x1 /CLONE=IMAGE:3396616 /TID=Xl.10771.1 /CNT=2 /FEA=EST /TIER=ConsEnd /STK=2 /UG=Xl.10771 /UG_TITLE=ESTs
Xl.8285.1.S1_a_at	6.81097	6.89916	6.89916	10.8977	10.1944	10.038	10.3918	6.86976	10.3805	-3.51074	-14.2059	3.39466e-07	1.55384e-05	7.41884	gb:BC044700.1 /DB_XREF=gi:27882422 /TID=Xl.8285.1 /CNT=1 /FEA=FLmRNA /TIER=FL /STK=1 /UG=Xl.8285 /DEF=Xenopus laevis, Similar to casein kinase 1, delta, clone MGC:53415 IMAGE:5571715, mRNA, complete cds. /PROD=Similar to casein kinase 1, delta /FL=gb:BC044700.1
Xl.16894.1.A1_at	2.46551	5.65811	5.65811	8.1034	6.79306	8.58574	8.91424	4.59391	8.09911	-3.5052	-4.25011	0.00246563	0.00620732	-1.88496	gb:BI350114 /DB_XREF=gi:15044560 /DB_XREF=dac63d03.x1 /CLONE=IMAGE:4434844 /TID=Xl.16894.1 /CNT=7 /FEA=EST /TIER=ConsEnd /STK=1 /UG=Xl.16894 /UG_TITLE=ESTs, Moderately similar to AC13_HUMAN Activator 1 38 kDa subunit (Replication factor C 38 kDa subunit) (A1 38 kDa subunit) (RF-C 38 kDa subunit) (RFC38) (H.sapiens)
Xl.15070.1.S1_at	5.90825	5.91716	5.91716	9.55415	9.42132	9.38122	9.31415	5.91419	9.41771	-3.50352	-19.0279	3.0694e-08	4.95092e-06	9.71035	gb:BQ386483 /DB_XREF=gi:21074170 /DB_XREF=NISC_mn18d12.x1 /CLONE=IMAGE:5073839 /TID=Xl.15070.1 /CNT=10 /FEA=EST /TIER=ConsEnd /STK=0 /UG=Xl.15070 /UG_TITLE=ESTs, Weakly similar to THIO_HUMAN Thioredoxin (ATL-derived factor) (ADF) (Surface associated sulphydryl protein) (SASP) (H.sapiens)
Xl.3413.1.A1_at	4.51628	5.69029	5.69029	9.11276	9.11428	8.28451	8.68838	5.29895	8.79998	-3.50103	-9.78981	6.701e-06	0.000100306	4.3782	gb:BJ044782 /DB_XREF=gi:17399494 /DB_XREF=BJ044782 /CLONE=XL002b14 /TID=Xl.3413.1 /CNT=17 /FEA=EST /TIER=Stack /STK=8 /UG=Xl.3413 /UG_TITLE=ESTs, Moderately similar to FtsJ homolog 3 (E. coli); likely ortholog of mouse ectoplacental cone, invasive trophoblast giant cells, extraembryonic ectoderm and chorion sequence 3 (Homo sapiens) (H.sapiens)
Xl.16295.1.A1_at	4.97234	4.63109	4.63109	7.2948	9.93985	8.00123	7.74556	4.74484	8.24536	-3.50052	-6.19975	0.000206062	0.000948852	0.753857	gb:BJ045986 /DB_XREF=gi:17372691 /DB_XREF=BJ045986 /CLONE=XL005o06 /TID=Xl.16295.1 /CNT=3 /FEA=EST /TIER=ConsEnd /STK=1 /UG=Xl.16295 /UG_TITLE=ESTs
Xl.10381.1.S1_at	5.56342	4.86015	4.86015	8.6064	8.36142	9.19664	8.2082	5.09458	8.59317	-3.49859	-11.4372	1.95542e-06	4.66107e-05	5.65308	gb:BF072242 /DB_XREF=gi:10848881 /DB_XREF=db53g10.x1 /CLONE=IMAGE:3302274 /TID=Xl.10381.1 /CNT=10 /FEA=EST /TIER=ConsEnd /STK=1 /UG=Xl.10381 /UG_TITLE=ESTs, Moderately similar to renal tumor antigen; renal cell carcinoma antigen (MOK protein kinase) (Homo sapiens) (H.sapiens)
Xl.5488.1.S1_s_at	4.73616	4.87619	4.87619	8.88006	7.90668	8.9611	7.55673	4.82951	8.32614	-3.49663	-9.53049	8.2668e-06	0.000114372	4.15879	gb:CB207641 /DB_XREF=gi:28248425 /DB_XREF=AGENCOURT_11343592 /CLONE=IMAGE:6880063 /TID=Xl.5488.1 /CNT=67 /FEA=mRNA /TIER=ConsEnd /STK=0 /UG=Xl.5488 /UG_TITLE=Xenopus laevis clone S10-47-H5 mRNA sequence
Xl.10914.1.S1_s_at	2.87078	5.6256	5.6256	8.49165	8.81683	7.78122	7.72457	4.70733	8.20357	-3.49624	-5.26794	0.000631471	0.00211195	-0.439497	gb:BG233701 /DB_XREF=gi:12747548 /DB_XREF=daa26h03.x1 /CLONE=IMAGE:4057565 /TID=Xl.10914.1 /CNT=2 /FEA=EST /TIER=ConsEnd /STK=1 /UG=Xl.10914 /UG_TITLE=ESTs
Xl.18632.1.S1_at	2.59167	2.61298	2.61298	6.1949	6.77572	4.95125	6.48512	2.60588	6.10175	-3.49587	-8.60242	1.82716e-05	0.000193436	3.32581	gb:BI443212 /DB_XREF=gi:15267919 /DB_XREF=dae56b11.x3 /CLONE=IMAGE:4677861 /TID=Xl.18632.1 /CNT=2 /FEA=EST /TIER=ConsEnd /STK=1 /UG=Xl.18632 /UG_TITLE=ESTs
Xl.14892.1.A1_at	5.40048	5.28474	5.28474	9.12273	8.46706	9.07721	8.60447	5.32332	8.81787	-3.49455	-14.8909	2.31109e-07	1.24614e-05	7.79715	gb:BJ052900 /DB_XREF=gi:17420741 /DB_XREF=BJ052900 /CLONE=XL043b01 /TID=Xl.14892.1 /CNT=2 /FEA=EST /TIER=ConsEnd /STK=2 /UG=Xl.14892 /UG_TITLE=ESTs
Xl.24234.1.A1_at	2.59167	3.04127	3.04127	4.8253	7.25665	6.80969	6.64949	2.8914	6.38528	-3.49388	-6.62058	0.000128869	0.00067986	1.25398	gb:BJ076875 /DB_XREF=gi:17521791 /DB_XREF=BJ076875 /CLONE=XL059b11 /TID=Xl.24234.1 /CNT=2 /FEA=EST /TIER=ConsEnd /STK=1 /UG=Xl.24234 /UG_TITLE=ESTs
Xl.6567.1.S1_at	6.89085	7.07783	7.07783	10.3895	10.074	10.6201	10.9533	7.0155	10.5092	-3.49374	-14.044	3.72693e-07	1.60916e-05	7.32639	gb:BC041736.1 /DB_XREF=gi:27694597 /TID=Xl.6567.1 /CNT=52 /FEA=mRNA /TIER=Stack /STK=8 /UG=Xl.6567 /UG_TITLE=Xenopus laevis, Similar to ATPase, H+ transporting, lysosomal 31kDa, V1 subunit E isoform 1, clone IMAGE:4684284, mRNA /DEF=Xenopus laevis, Similar to ATPase, H+ transporting, lysosomal 31kDa, V1 subunit E isoform 1, clone IMAGE:4684284, mRNA.
Xl.15112.1.S1_at	5.97796	5.20511	5.20511	9.14019	8.62918	9.5392	8.51387	5.46272	8.95561	-3.49289	-10.7341	3.24123e-06	6.35832e-05	5.1327	gb:BC044081.1 /DB_XREF=gi:28422174 /TID=Xl.15112.1 /CNT=11 /FEA=mRNA /TIER=ConsEnd /STK=3 /UG=Xl.15112 /UG_TITLE=Xenopus laevis, Similar to hypothetical protein FLJ11294, clone IMAGE:4682702, mRNA /DEF=Xenopus laevis, Similar to hypothetical protein FLJ11294, clone IMAGE:4682702, mRNA.
Xl.22995.1.S1_at	4.78156	4.24853	4.24853	8.01932	8.24769	8.21817	7.18863	4.4262	7.91845	-3.49225	-11.2742	2.19307e-06	4.92904e-05	5.53534	gb:CD327081 /DB_XREF=gi:31091412 /DB_XREF=AGENCOURT_14147247 /CLONE=IMAGE:6948049 /TID=Xl.22995.1 /CNT=11 /FEA=EST /TIER=ConsEnd /STK=0 /UG=Xl.22995 /UG_TITLE=ESTs, Weakly similar to RNA processing factor 1 (Homo sapiens) (H.sapiens)
Xl.15802.1.A1_at	5.67284	6.69623	6.69623	10.4096	9.98349	9.77506	9.21998	6.3551	9.84704	-3.49194	-9.66563	7.40544e-06	0.000106947	4.27382	gb:BJ078128 /DB_XREF=gi:17523044 /DB_XREF=BJ078128 /CLONE=XL063c18 /TID=Xl.15802.1 /CNT=3 /FEA=EST /TIER=ConsEnd /STK=3 /UG=Xl.15802 /UG_TITLE=ESTs, Weakly similar to hypothetical protein MGC9084 (Homo sapiens) (H.sapiens)
Xl.4928.1.S1_at	4.44875	3.39066	3.39066	6.37175	6.59003	7.59923	8.37513	3.74335	7.23404	-3.49068	-6.81797	0.000104153	0.000591004	1.48071	gb:L02956.1 /DB_XREF=gi:214744 /TID=Xl.4928.1 /CNT=13 /FEA=FLmRNA /TIER=FL /STK=1 /UG=Xl.4928 /DEF=Xenopus laevis ribonucleoprotein mRNA, complete cds. /PROD=ribonucleoprotein /FL=gb:L02956.1
Xl.23845.1.A1_at	4.05551	2.6472	2.6472	7.54651	5.54557	7.1637	6.16835	3.11664	6.60603	-3.48939	-6.41171	0.000162241	0.000796639	1.00866	gb:CB565160 /DB_XREF=gi:29484690 /DB_XREF=AGENCOURT_13321301 /CLONE=IMAGE:6875924 /TID=Xl.23845.1 /CNT=35 /FEA=EST /TIER=Stack /STK=9 /UG=Xl.23845 /UG_TITLE=ESTs, Moderately similar to CANS_HUMAN Calcium-dependent protease, small subunit (Calpain regulatory subunit) (Calcium-activated neutral proteinase) (CANP) (H.sapiens)
Xl.11031.1.A1_at	4.89599	6.20116	6.20116	9.54295	8.81316	9.51278	9.14544	5.76611	9.25358	-3.48748	-9.5026	8.45805e-06	0.000116058	4.13486	gb:BE026973 /DB_XREF=gi:8320334 /DB_XREF=db34e07.x1 /CLONE=IMAGE:3300420 /TID=Xl.11031.1 /CNT=2 /FEA=EST /TIER=ConsEnd /STK=1 /UG=Xl.11031 /UG_TITLE=ESTs
Xl.17622.1.A1_at	4.05572	4.64541	4.64541	8.24402	7.89412	7.63572	7.96136	4.44885	7.93381	-3.48496	-14.1456	3.51426e-07	1.55835e-05	7.38459	gb:BG811028 /DB_XREF=gi:14181996 /DB_XREF=daf38f12.x1 /CLONE=IMAGE:4741006 /TID=Xl.17622.1 /CNT=1 /FEA=EST /TIER=ConsEnd /STK=1 /UG=Xl.17622 /UG_TITLE=EST
Xl.23393.1.S1_at	6.75058	6.08035	6.08035	9.74451	9.38059	10.0151	10.0058	6.30376	9.78652	-3.48276	-13.0851	6.61871e-07	2.29369e-05	6.7532	gb:BC045121.1 /DB_XREF=gi:28175295 /TID=Xl.23393.1 /CNT=10 /FEA=mRNA /TIER=ConsEnd /STK=0 /UG=Xl.23393 /UG_TITLE=Xenopus laevis, Similar to prohibitin, clone IMAGE:5572305, mRNA /DEF=Xenopus laevis, Similar to prohibitin, clone IMAGE:5572305, mRNA.
Xl.8082.1.S1_at	6.09839	5.93516	5.93516	9.52521	9.63562	9.73248	8.99235	5.98957	9.47142	-3.48185	-14.7672	2.47418e-07	1.29753e-05	7.73034	gb:BI445737 /DB_XREF=gi:15270444 /DB_XREF=dae58c04.x3 /CLONE=IMAGE:4678255 /TID=Xl.8082.1 /CNT=8 /FEA=EST /TIER=ConsEnd /STK=5 /UG=Xl.8082 /UG_TITLE=ESTs, Moderately similar to nuclear autoantigen of 14 kDa (Homo sapiens) (H.sapiens)
Xl.26083.2.S1_at	6.5998	6.42644	6.42644	10.1559	10.0055	9.5114	10.1849	6.48422	9.96441	-3.48018	-15.0724	2.09294e-07	1.19175e-05	7.89407	gb:CB564949 /DB_XREF=gi:29484479 /DB_XREF=AGENCOURT_13326948 /CLONE=IMAGE:6876263 /TID=Xl.26083.2 /CNT=73 /FEA=EST /TIER=Stack /STK=12 /UG=Xl.26083 /UG_TITLE=ESTs, Moderately similar to malate dehydrogenase 2, NAD (mitochondrial); Malate dehydrogenase, mitochondrial (Homo sapiens) (H.sapiens)
Xl.12077.1.S1_at	2.64068	5.6256	5.6256	8.12608	8.01502	9.31756	6.9613	4.63063	8.10499	-3.47436	-4.36482	0.00209883	0.00544625	-1.71472	gb:AY048114.1 /DB_XREF=gi:15809632 /TID=Xl.12077.1 /CNT=3 /FEA=FLmRNA /TIER=FL /STK=1 /UG=Xl.12077 /DEF=Xenopus laevis intraflagellar transport protein 20 mRNA, complete cds. /PROD=intraflagellar transport protein 20 /FL=gb:AY048114.1
Xl.8709.1.S1_at	6.53969	7.23598	7.23598	10.0782	9.61552	10.9025	11.3043	7.00388	10.4751	-3.47125	-8.2766	2.45454e-05	0.000234724	3.01429	gb:BC041730.1 /DB_XREF=gi:27695193 /TID=Xl.8709.1 /CNT=135 /FEA=FLmRNA /TIER=FL+Stack /STK=32 /UG=Xl.8709 /DEF=Xenopus laevis, Similar to Protein phosphatase type 1 alpha, catalytic subunit, clone MGC:52704 IMAGE:4682749, mRNA, complete cds. /PROD=Similar to Protein phosphatase type 1 alpha,catalytic subunit /FL=gb:BC041730.1
Xl.2234.1.S1_at	6.02801	6.42564	6.42564	9.26301	9.7369	10.4824	9.55649	6.2931	9.75969	-3.46659	-11.2493	2.23201e-06	4.93925e-05	5.51725	gb:BC046707.1 /DB_XREF=gi:28302196 /TID=Xl.2234.1 /CNT=79 /FEA=FLmRNA /TIER=FL /STK=5 /UG=Xl.2234 /DEF=Xenopus laevis, clone MGC:53247 IMAGE:5543602, mRNA, complete cds. /PROD=Unknown (protein for MGC:53247) /FL=gb:BC046707.1
Xl.4115.1.S1_at	3.51932	2.59347	2.59347	7.48422	8.14637	2.84494	6.98816	2.90209	6.36593	-3.46384	-3.08865	0.0139485	0.0260275	-3.69461	gb:BC044095.1 /DB_XREF=gi:28277265 /TID=Xl.4115.1 /CNT=43 /FEA=FLmRNA /TIER=FL+Stack /STK=12 /UG=Xl.4115 /DEF=Xenopus laevis, clone MGC:52758 IMAGE:4684109, mRNA, complete cds. /PROD=Unknown (protein for MGC:52758) /FL=gb:BC044095.1
Xl.7125.1.S1_at	7.09701	7.05599	7.05599	10.6424	10.3846	10.3677	10.7179	7.06967	10.5282	-3.4585	-17.6404	5.74115e-08	6.59371e-06	9.13154	gb:AJ009316.1 /DB_XREF=gi:4165307 /TID=Xl.7125.1 /CNT=12 /FEA=mRNA /TIER=ConsEnd /STK=0 /UG=Xl.7125 /UG_TITLE=Xenopus laevis cDNA clone 1-16 /DEF=Xenopus laevis cDNA clone 1-16.
Xl.711.1.S1_at	4.7302	4.83535	4.83535	8.20827	7.59035	8.51771	8.6984	4.8003	8.25368	-3.45338	-12.1172	1.23066e-06	3.50238e-05	6.1261	gb:AF312719.1 /DB_XREF=gi:11245469 /TID=Xl.711.1 /CNT=4 /FEA=FLmRNA /TIER=FL /STK=2 /UG=Xl.711 /DEF=Xenopus laevis nuclear domain-10 protein NDP52 mRNA, complete cds. /PROD=nuclear domain-10 protein NDP52 /FL=gb:AF312719.1
Xl.22016.1.A1_at	6.866	6.04743	6.04743	10.1768	9.71244	9.90441	9.29664	6.32029	9.77257	-3.45228	-11.4489	1.93951e-06	4.65511e-05	5.66146	gb:BF232138 /DB_XREF=gi:11174478 /DB_XREF=de16c11.x1 /CLONE=IMAGE:3437973 /TID=Xl.22016.1 /CNT=6 /FEA=EST /TIER=ConsEnd /STK=5 /UG=Xl.22016 /UG_TITLE=ESTs, Moderately similar to TRK-fused gene (Homo sapiens) (H.sapiens)
Xl.10224.1.A1_at	5.13987	4.32284	4.32284	8.26508	8.59147	7.50442	7.81227	4.59518	8.04331	-3.44813	-10.3826	4.21909e-06	7.48618e-05	4.85964	gb:BF428245 /DB_XREF=gi:11439952 /DB_XREF=daa06f07.x1 /CLONE=IMAGE:4055557 /TID=Xl.10224.1 /CNT=2 /FEA=EST /TIER=ConsEnd /STK=1 /UG=Xl.10224 /UG_TITLE=ESTs
Xl.2737.1.A1_at	3.96094	4.30195	4.30195	7.80545	7.17798	8.22676	7.33195	4.18828	7.63554	-3.44725	-11.8928	1.43009e-06	3.7932e-05	5.97311	gb:BJ076981 /DB_XREF=gi:17521897 /DB_XREF=BJ076981 /CLONE=XL059i01 /TID=Xl.2737.1 /CNT=2 /FEA=EST /TIER=ConsEnd /STK=1 /UG=Xl.2737 /UG_TITLE=ESTs
Xl.25828.1.A1_at	5.9487	5.69029	5.69029	10.1081	8.58922	9.25498	8.9362	5.77643	9.22212	-3.4457	-9.8521	6.3759e-06	9.82717e-05	4.43008	gb:BJ081192 /DB_XREF=gi:17575257 /DB_XREF=BJ081192 /CLONE=XL070n19 /TID=Xl.25828.1 /CNT=8 /FEA=EST /TIER=Stack /STK=6 /UG=Xl.25828 /UG_TITLE=ESTs, Moderately similar to Y45F10D.4.p (Caenorhabditis elegans) (C.elegans)
Xl.1475.1.A1_at	3.78242	4.88867	4.88867	7.32108	7.71794	8.17618	8.63032	4.51992	7.96138	-3.44146	-8.75693	1.59354e-05	0.00017581	3.46993	gb:BG811395 /DB_XREF=gi:14182375 /DB_XREF=daf62g06.x1 /CLONE=IMAGE:4743346 /TID=Xl.1475.1 /CNT=7 /FEA=EST /TIER=ConsEnd /STK=1 /UG=Xl.1475 /UG_TITLE=ESTs, Moderately similar to P55G_HUMAN Phosphatidylinositol 3-kinase regulatory gamma subunit (PI3-kinase P85-gamma subunit) (PtdIns-3-kinase P85-gamma) (p55PIK) (H.sapiens)
Xl.2395.1.S1_at	4.89044	2.95974	2.95974	7.5637	6.94034	6.67268	6.99451	3.60331	7.04281	-3.4395	-7.13774	7.44576e-05	0.000476934	1.83777	gb:BG023105 /DB_XREF=gi:12479184 /DB_XREF=dab11g11.x1 /CLONE=IMAGE:4174269 /TID=Xl.2395.1 /CNT=3 /FEA=EST /TIER=ConsEnd /STK=1 /UG=Xl.2395 /UG_TITLE=ESTs, Moderately similar to T08675 hypothetical protein DKFZp564F0522.1 - human (fragment) (H.sapiens)
Xl.3630.1.S1_at	2.87078	4.1723	4.1723	7.07935	7.38944	7.55179	6.68187	3.73846	7.17561	-3.43715	-9.18532	1.10163e-05	0.000138579	3.85796	gb:BG021248 /DB_XREF=gi:12477327 /DB_XREF=df32c12.x1 /CLONE=IMAGE:3580054 /TID=Xl.3630.1 /CNT=19 /FEA=EST /TIER=ConsEnd /STK=5 /UG=Xl.3630 /UG_TITLE=ESTs, Moderately similar to hypothetical protein FLJ20457 (Homo sapiens) (H.sapiens)
Xl.26465.1.A1_at	2.34679	2.1998	2.1998	6.14079	5.50615	3.60342	7.49054	2.2488	5.68523	-3.43643	-4.53997	0.00164733	0.00446428	-1.45828	gb:BJ089263 /DB_XREF=gi:17586913 /DB_XREF=BJ089263 /CLONE=XL096p03 /TID=Xl.26465.1 /CNT=6 /FEA=EST /TIER=ConsEnd /STK=1 /UG=Xl.26465 /UG_TITLE=ESTs
Xl.14620.1.A1_at	2.2394	2.59347	2.59347	6.60472	6.22752	6.2044	4.6007	2.47545	5.90933	-3.43388	-7.64065	4.48998e-05	0.000346322	2.37492	gb:BJ056766 /DB_XREF=gi:17479319 /DB_XREF=BJ056766 /CLONE=XL032p09 /TID=Xl.14620.1 /CNT=2 /FEA=EST /TIER=ConsEnd /STK=2 /UG=Xl.14620 /UG_TITLE=ESTs
Xl.18559.2.S1_a_at	10.7659	6.38338	6.38338	11.2534	10.9371	11.3065	11.5781	7.84421	11.2688	-3.42456	-3.55285	0.00683383	0.0143486	-2.95553	gb:AW198964 /DB_XREF=gi:6479533 /DB_XREF=da09c04.x1 /CLONE=XENOPUS_SOURCE_ID:xlnoc003b07 /TID=Xl.18559.2 /CNT=83 /FEA=EST /TIER=Stack /STK=20 /UG=Xl.18559 /UG_TITLE=Xenopus laevis clone S10-48-D6 mRNA sequence
Xl.6988.1.A1_at	5.76645	4.48337	4.48337	8.70274	8.114	7.93702	8.58074	4.91106	8.33363	-3.42256	-9.30633	9.95124e-06	0.00012883	3.96459	gb:BI349938 /DB_XREF=gi:15044384 /DB_XREF=dac60b07.x1 /CLONE=IMAGE:4434373 /TID=Xl.6988.1 /CNT=10 /FEA=EST /TIER=ConsEnd /STK=1 /UG=Xl.6988 /UG_TITLE=ESTs
Xl.4028.1.S1_at	6.91835	4.30639	4.30639	9.07542	9.03847	8.22968	8.03118	5.17704	8.59369	-3.41665	-5.36182	0.000561102	0.00193579	-0.31369	gb:BF072334 /DB_XREF=gi:10848973 /DB_XREF=db55f01.x1 /CLONE=IMAGE:3302425 /TID=Xl.4028.1 /CNT=2 /FEA=EST /TIER=ConsEnd /STK=2 /UG=Xl.4028 /UG_TITLE=ESTs, Weakly similar to stimulated by retinoic acid 13 (Mus musculus) (M.musculus)
Xl.1009.1.S1_a_at	5.82839	7.12554	7.12554	9.63788	10.1209	9.55032	11.1251	6.69316	10.1086	-3.41541	-7.32869	6.12581e-05	0.000424592	2.04515	gb:AB036753.1 /DB_XREF=gi:6714519 /GEN=Xporc-d /TID=Xl.1009.1 /CNT=5 /FEA=FLmRNA /TIER=FL /STK=4 /UG=Xl.1009 /DEF=Xenopus laevis Xporc-d mRNA for porcupine-D, complete cds. /PROD=porcupine-D /FL=gb:AB036751.1 gb:AB036753.1 gb:AB036752.1
Xl.7123.2.A1_a_at	4.05547	3.72135	3.72135	7.52149	7.14616	7.48376	6.8244	3.83272	7.24395	-3.41123	-14.0448	3.72501e-07	1.60916e-05	7.3269	gb:BG161066 /DB_XREF=gi:12694985 /DB_XREF=dab64h04.x1 /CLONE=IMAGE:4201974 /TID=Xl.7123.2 /CNT=2 /FEA=EST /TIER=ConsEnd /STK=1 /UG=Xl.7123 /UG_TITLE=ESTs, Moderately similar to AAKG_HUMAN 5-AMP-activated protein kinase, gamma-1 subunit (AMPK gamma-1 chain) (AMPKg) (H.sapiens)
Xl.8043.1.A1_at	7.61979	6.92827	6.92827	10.7278	10.2261	10.7564	10.5622	7.15878	10.5681	-3.40936	-13.2668	5.91919e-07	2.15816e-05	6.86528	gb:CB591902 /DB_XREF=gi:29509758 /DB_XREF=AGENCOURT_13045448 /CLONE=IMAGE:6897714 /TID=Xl.8043.1 /CNT=11 /FEA=EST /TIER=Stack /STK=6 /UG=Xl.8043 /UG_TITLE=ESTs, Weakly similar to neuronal protein 17.3; similar to mouse neuronal protein 15.6 (Homo sapiens) (H.sapiens)
Xl.19707.1.S1_at	5.55862	5.01838	5.01838	8.2637	8.45542	8.92657	8.75954	5.19846	8.60131	-3.40285	-13.4984	5.14383e-07	1.97955e-05	7.00575	gb:BQ398432 /DB_XREF=gi:21086119 /DB_XREF=NISC_mo07e06.x1 /CLONE=IMAGE:5162602 /TID=Xl.19707.1 /CNT=2 /FEA=EST /TIER=ConsEnd /STK=1 /UG=Xl.19707 /UG_TITLE=ESTs, Highly similar to A56959 nuclear protein import factor - human (H.sapiens)
Xl.23036.1.A1_at	3.15086	2.95025	2.95025	6.49718	6.64914	5.96124	6.57082	3.01712	6.41959	-3.40248	-14.6764	2.60205e-07	1.34615e-05	7.68089	gb:BM190719 /DB_XREF=gi:17526682 /DB_XREF=daj30b05.x1 /CLONE=IMAGE:5077952 /TID=Xl.23036.1 /CNT=2 /FEA=EST /TIER=ConsEnd /STK=2 /UG=Xl.23036 /UG_TITLE=ESTs
Xl.21978.1.S1_at	3.06606	5.10604	5.10604	8.23619	7.69145	7.52642	7.85518	4.42604	7.82731	-3.40127	-6.91108	9.43453e-05	0.000553682	1.58596	gb:CD327880 /DB_XREF=gi:31092211 /DB_XREF=AGENCOURT_14147938 /CLONE=IMAGE:6950419 /TID=Xl.21978.1 /CNT=116 /FEA=mRNA /TIER=Stack /STK=39 /UG=Xl.21978 /UG_TITLE=Xenopus laevis CArG-binding factor A mRNA, partial cds
Xl.25822.1.S1_at	4.44875	3.31827	3.31827	7.5161	7.1217	5.73404	8.00238	3.69509	7.09355	-3.39846	-6.34004	0.000175793	0.000847602	0.923171	gb:BG159942 /DB_XREF=gi:12693861 /DB_XREF=df72a03.x1 /CLONE=IMAGE:3744676 /TID=Xl.25822.1 /CNT=44 /FEA=EST /TIER=Stack /STK=12 /UG=Xl.25822 /UG_TITLE=ESTs, Weakly similar to heterogeneous nuclear ribonucleoprotein D-like; A+U-rich element RNA binding factor (Homo sapiens) (H.sapiens)
Xl.12380.1.A1_x_at	5.92153	5.29995	5.29995	9.61916	9.40239	8.19956	8.39852	5.50714	8.90491	-3.39776	-8.66427	1.72937e-05	0.00018773	3.38377	gb:BJ048155 /DB_XREF=gi:17406212 /DB_XREF=BJ048155 /CLONE=XL018n20 /TID=Xl.12380.1 /CNT=2 /FEA=EST /TIER=ConsEnd /STK=2 /UG=Xl.12380 /UG_TITLE=ESTs, Weakly similar to nasopharyngeal epithelium specific protein 1 (Homo sapiens) (H.sapiens)
Xl.5499.1.S1_at	8.28812	6.3582	6.3582	10.4313	10.536	10.2503	10.3632	7.00151	10.3952	-3.39367	-7.47719	5.27716e-05	0.000386706	2.20351	gb:CD325993 /DB_XREF=gi:31090324 /DB_XREF=AGENCOURT_14145512 /CLONE=IMAGE:6949635 /TID=Xl.5499.1 /CNT=100 /FEA=mRNA /TIER=Stack /STK=17 /UG=Xl.5499 /UG_TITLE=Xenopus laevis, Similar to splicing factor, arginineserine-rich 5, clone IMAGE:5570132, mRNA
Xl.18118.1.A1_at	6.66925	6.07208	6.07208	9.81473	9.55471	9.84119	9.44397	6.27114	9.66365	-3.39251	-14.3268	3.16795e-07	1.50347e-05	7.48714	gb:BG885925 /DB_XREF=gi:14263017 /DB_XREF=de09h03.x1 /CLONE=IMAGE:3437788 /TID=Xl.18118.1 /CNT=2 /FEA=EST /TIER=ConsEnd /STK=1 /UG=Xl.18118 /UG_TITLE=ESTs
Xl.1275.1.S1_at	2.55722	2.71799	2.71799	5.73147	4.80628	6.50338	7.18198	2.6644	6.05578	-3.39138	-6.79397	0.000106859	0.000601901	1.4534	gb:CD360877 /DB_XREF=gi:31132288 /DB_XREF=AGENCOURT_14239218 /CLONE=IMAGE:6957679 /TID=Xl.1275.1 /CNT=12 /FEA=mRNA /TIER=ConsEnd /STK=3 /UG=Xl.1275 /UG_TITLE=X.laevis mRNA for PP2A 65 kDa regulatory subunit alpha-isotype
Xl.15883.1.S1_at	2.09344	2.39359	2.39359	5.41275	5.53145	6.36134	5.42775	2.29354	5.68332	-3.38978	-12.0778	1.26333e-06	3.53201e-05	6.09945	gb:CA973636 /DB_XREF=gi:27506290 /DB_XREF=AGENCOURT_10767379 /CLONE=IMAGE:6325932 /TID=Xl.15883.1 /CNT=8 /FEA=EST /TIER=ConsEnd /STK=0 /UG=Xl.15883 /UG_TITLE=ESTs, Moderately similar to hepatocellular carcinoma-associated antigen 59; hypothetical protein (Homo sapiens) (H.sapiens)
Xl.11472.1.S1_at	5.40309	5.47275	5.47275	10.0098	9.34947	8.88437	7.11324	5.44953	8.83921	-3.38968	-5.72934	0.000357481	0.00139317	0.166644	gb:BF071991 /DB_XREF=gi:10848630 /DB_XREF=db49e06.x1 /CLONE=IMAGE:3301858 /TID=Xl.11472.1 /CNT=2 /FEA=EST /TIER=ConsEnd /STK=1 /UG=Xl.11472 /UG_TITLE=ESTs, Moderately similar to prefoldin 1; prefoldin subunit 1 (Homo sapiens) (H.sapiens)
Xl.4589.1.S1_at	4.14579	3.94944	3.94944	7.27653	7.3451	7.30924	7.68312	4.01489	7.4035	-3.38861	-16.7542	8.78156e-08	8.77011e-06	8.7308	gb:BC043769.1 /DB_XREF=gi:27696865 /TID=Xl.4589.1 /CNT=35 /FEA=FLmRNA /TIER=FL+Stack /STK=6 /UG=Xl.4589 /DEF=Xenopus laevis, Similar to hypoxia-inducible factor 1, alpha subunit (basic helix-loop-helix transcription factor), clone MGC:52952 IMAGE:4930371, mRNA, complete cds. /PROD=Similar to hypoxia-inducible factor 1, alphasubunit (basic helix-loop-helix transcription factor) /FL=gb:BC043769.1
Xl.18609.1.A1_at	4.78156	4.90241	4.90241	8.58922	8.29767	8.18831	7.91319	4.86213	8.2471	-3.38497	-15.3499	1.80257e-07	1.11931e-05	8.03954	gb:AW198788 /DB_XREF=gi:6479357 /DB_XREF=da06e01.x1 /CLONE=XENOPUS_SOURCE_ID:xlnoc002g01 /TID=Xl.18609.1 /CNT=2 /FEA=EST /TIER=ConsEnd /STK=1 /UG=Xl.18609 /UG_TITLE=ESTs, Weakly similar to EP15_HUMAN Epidermal growth factor receptor substrate 15 (Protein Eps15) (AF-1P protein) (H.sapiens)
Xl.5377.1.S1_at	7.55037	6.42939	6.42939	9.65104	10.082	9.98068	11.0269	6.80305	10.1851	-3.38209	-8.4106	2.1715e-05	0.000218004	3.14368	gb:CB756106 /DB_XREF=gi:29835611 /DB_XREF=AGENCOURT_13003360 /CLONE=IMAGE:6873686 /TID=Xl.5377.1 /CNT=127 /FEA=mRNA /TIER=Stack /STK=33 /UG=Xl.5377 /UG_TITLE=Xenopus laevis, Similar to procollagen-proline, 2-oxoglutarate 4-dioxygenase (proline 4-hydroxylase), beta polypeptide (protein disulfide isomerase; thyroid hormone binding protein p55), clone IMAGE:5542045, mRNA, partial cds
Xl.12707.1.A1_at	4.62059	4.76982	4.76982	8.46441	7.95682	7.8279	8.13503	4.72008	8.09604	-3.37596	-15.3193	1.83223e-07	1.11931e-05	8.02368	gb:BI312844 /DB_XREF=gi:14987171 /DB_XREF=dai27f11.x1 /CLONE=IMAGE:4962980 /TID=Xl.12707.1 /CNT=8 /FEA=EST /TIER=ConsEnd /STK=1 /UG=Xl.12707 /UG_TITLE=ESTs, Moderately similar to RB5C_HUMAN Ras-related protein Rab-5C (RAB5L) (L1880) (H.sapiens)
Xl.6045.1.S1_at	3.28245	4.55684	4.55684	7.11592	7.83393	7.08468	7.98214	4.13205	7.50417	-3.37212	-8.64263	1.76292e-05	0.000189402	3.36353	gb:M37788.1 /DB_XREF=gi:213955 /GEN=atpb-3 /TID=Xl.6045.1 /CNT=65 /FEA=FLmRNA /TIER=FL /STK=3 /UG=Xl.6045 /DEF=Xenopus laevis Na+K+-transporting ATPase beta subunit (atpb-3) mRNA, complete cds. /PROD=Na+K+-transporting ATPase beta subunit /FL=gb:M37788.1
Xl.7688.1.S1_at	6.10512	4.78156	4.78156	8.87109	8.37669	8.45218	8.6787	5.22275	8.59467	-3.37192	-9.62403	7.65951e-06	0.000109279	4.23857	gb:CA974667 /DB_XREF=gi:27507321 /DB_XREF=AGENCOURT_10747869 /CLONE=IMAGE:6327338 /TID=Xl.7688.1 /CNT=31 /FEA=EST /TIER=Stack /STK=9 /UG=Xl.7688 /UG_TITLE=ESTs, Weakly similar to P2X7_MOUSE P2X PURINOCEPTOR 7 (ATP RECEPTOR) (P2X7) (PURINERGIC RECEPTOR) (P2Z RECEPTOR) (M.musculus)
Xl.13354.1.A1_at	3.96902	4.89102	4.89102	8.17263	8.04477	7.09183	8.50391	4.58369	7.95328	-3.3696	-8.79318	1.54365e-05	0.000172124	3.50342	gb:BJ050962 /DB_XREF=gi:17495608 /DB_XREF=BJ050962 /CLONE=XL027d12 /TID=Xl.13354.1 /CNT=3 /FEA=EST /TIER=ConsEnd /STK=1 /UG=Xl.13354 /UG_TITLE=ESTs
Xl.19152.1.S1_at	3.73348	7.32431	7.32431	9.67977	9.48495	9.874	8.94655	6.12737	9.49632	-3.36895	-4.15444	0.00282429	0.00693394	-2.02832	gb:BF428145 /DB_XREF=gi:11439837 /DB_XREF=daa03f04.x1 /CLONE=IMAGE:4055190 /TID=Xl.19152.1 /CNT=11 /FEA=mRNA /TIER=ConsEnd /STK=2 /UG=Xl.19152 /UG_TITLE=Xenopus laevis, Similar to hypothetical protein MGC10854, clone IMAGE:5570299, mRNA, partial cds
Xl.8955.2.S1_x_at	2.64068	5.82774	5.82774	7.35019	8.03888	8.28451	8.85569	4.76538	8.13232	-3.36693	-4.42389	0.00193321	0.00509943	-1.62775	gb:BJ100120 /DB_XREF=gi:17602746 /DB_XREF=BJ100120 /CLONE=XL173h05 /TID=Xl.8955.2 /CNT=2 /FEA=EST /TIER=ConsEnd /STK=1 /UG=Xl.8955 /UG_TITLE=ESTs, Moderately similar to PDX3_HUMAN Thioredoxin-dependent peroxide reductase, mitochondrial precursor (Peroxiredoxin 3) (Antioxidant protein 1) (AOP-1) (MER5 protein homolog) (HBC189) (PRX III) (H.sapiens)
Xl.25492.1.S1_a_at	7.02316	6.49486	6.49486	10.9124	10.5567	9.56646	9.11327	6.67096	10.0372	-3.36626	-7.71855	4.16117e-05	0.000330505	2.45557	gb:D10692.1 /DB_XREF=gi:222972 /TID=Xl.25492.1 /CNT=48 /FEA=FLmRNA /TIER=FL+Stack /STK=31 /UG=Xl.25492 /DEF=Xenopus laevis mRNA for thymosin beta 4 peptide, complete cds. /PROD=thymosin beta 4 peptide /FL=gb:D10692.1
Xl.5375.1.A1_at	5.42185	6.82263	6.82263	10.0835	9.76369	9.56153	9.47857	6.3557	9.72182	-3.36611	-9.09468	1.18968e-05	0.000145978	3.77725	gb:BJ081321 /DB_XREF=gi:17575441 /DB_XREF=BJ081321 /CLONE=XL071e11 /TID=Xl.5375.1 /CNT=18 /FEA=EST /TIER=Stack /STK=11 /UG=Xl.5375 /UG_TITLE=ESTs, Weakly similar to progesterone binding protein (Homo sapiens) (H.sapiens)
Xl.5950.1.A1_at	5.89015	5.69029	5.69029	9.39037	8.14331	9.57174	9.3772	5.75691	9.12065	-3.36374	-9.58803	7.88716e-06	0.000110874	4.20795	gb:AW766506 /DB_XREF=gi:7698496 /DB_XREF=da63e01.x1 /CLONE=IMAGE:3199608 /TID=Xl.5950.1 /CNT=1 /FEA=EST /TIER=ConsEnd /STK=1 /UG=Xl.5950 /UG_TITLE=ESTs, Moderately similar to cofactor required for Sp1 transcriptional activation, subunit 6 (77kD); thyroid hormone receptor-associated protein, 80-KD subunit; 77 kDa transcriptional co-activator; vitamin D3 receptor interacting protein (Homo sapiens) …
Xl.14920.1.A1_at	4.71346	3.71927	3.71927	7.60781	7.99851	7.39936	6.64198	4.05066	7.41192	-3.36125	-8.84254	1.47846e-05	0.000167432	3.54882	gb:BM180910 /DB_XREF=gi:17404981 /DB_XREF=daj82g10.x1 /CLONE=IMAGE:5129658 /TID=Xl.14920.1 /CNT=3 /FEA=EST /TIER=ConsEnd /STK=1 /UG=Xl.14920 /UG_TITLE=ESTs
Xl.1506.1.S2_at	5.29098	3.26707	3.26707	7.17458	6.66438	7.47788	7.86503	3.94171	7.29547	-3.35376	-6.41586	0.000161493	0.000794326	1.01358	gb:BQ400130 /DB_XREF=gi:21087817 /DB_XREF=NISC_mp07e02.x1 /CLONE=IMAGE:4968674 /TID=Xl.1506.1 /CNT=15 /FEA=FLmRNA /TIER=ConsEnd /STK=0 /UG=Xl.1506 /UG_TITLE=Xenopus laevis, clone MGC:52765 IMAGE:4684167, mRNA, complete cds /FL=gb:BC041237.1
Xl.18714.1.S1_at	3.83051	4.14477	4.14477	7.26464	7.66939	7.22254	7.41637	4.04002	7.39324	-3.35322	-15.848	1.38719e-07	1.02782e-05	8.29313	gb:CA793827 /DB_XREF=gi:26042924 /DB_XREF=AGENCOURT_11043628 /CLONE=IMAGE:6865897 /TID=Xl.18714.1 /CNT=2 /FEA=EST /TIER=ConsEnd /STK=0 /UG=Xl.18714 /UG_TITLE=ESTs, Moderately similar to metalloprotease 1 (Homo sapiens) (H.sapiens)
Xl.6479.1.S2_at	4.36523	4.79033	4.79033	8.14127	7.22986	8.17476	8.44787	4.64863	7.99844	-3.34981	-10.6838	3.36439e-06	6.49411e-05	5.09414	gb:BC045227.1 /DB_XREF=gi:28175278 /TID=Xl.6479.1 /CNT=74 /FEA=FLmRNA /TIER=FL+Stack /STK=26 /UG=Xl.6479 /DEF=Xenopus laevis, Similar to MAD2 (mitotic arrest deficient, homolog)-like 1 (yeast), clone MGC:53137 IMAGE:5542641, mRNA, complete cds. /PROD=Similar to MAD2 (mitotic arrest deficient,homolog)-like 1 (yeast) /FL=gb:U66167.1 gb:BC045227.1
Xl.11583.1.A1_at	5.07137	5.00048	5.00048	7.85518	9.4194	7.06049	9.15401	5.02411	8.37227	-3.34816	-6.25107	0.000194374	0.000914434	0.816092	gb:BQ398266 /DB_XREF=gi:21085953 /DB_XREF=NISC_mo06b01.x1 /CLONE=IMAGE:5162425 /TID=Xl.11583.1 /CNT=5 /FEA=EST /TIER=ConsEnd /STK=2 /UG=Xl.11583 /UG_TITLE=ESTs
Xl.9665.1.A1_at	2.64068	4.04159	4.04159	6.08989	7.0824	6.62663	7.87006	3.57462	6.91724	-3.34262	-6.82976	0.000102851	0.000586518	1.49409	gb:BG161112 /DB_XREF=gi:12695031 /DB_XREF=dab65e05.x1 /CLONE=IMAGE:4201833 /TID=Xl.9665.1 /CNT=4 /FEA=EST /TIER=ConsEnd /STK=2 /UG=Xl.9665 /UG_TITLE=ESTs
Xl.4121.1.A1_at	5.23759	5.42682	5.42682	8.6631	8.54229	8.90295	8.70731	5.36374	8.70391	-3.34017	-17.1172	7.36006e-08	7.85214e-06	8.89804	gb:BJ056195 /DB_XREF=gi:17423706 /DB_XREF=BJ056195 /CLONE=XL035b01 /TID=Xl.4121.1 /CNT=4 /FEA=EST /TIER=ConsEnd /STK=3 /UG=Xl.4121 /UG_TITLE=ESTs, Highly similar to RN19_HUMAN RING finger protein 19 (Dorfin) (Double ring-finger protein) (p38 protein) (H.sapiens)
Xl.543.1.S1_at	5.6331	5.10604	5.10604	9.99382	7.1122	8.55281	8.82675	5.28172	8.62139	-3.33967	-5.77216	0.00033959	0.00134582	0.221367	gb:BQ400884 /DB_XREF=gi:21088571 /DB_XREF=NISC_mp11h04.x1 /CLONE=IMAGE:4969206 /TID=Xl.543.1 /CNT=34 /FEA=mRNA /TIER=ConsEnd /STK=0 /UG=Xl.543 /UG_TITLE=X.laevis calmodulin gene, mRNA, clone 11G2
Xl.8820.1.S1_at	4.17565	4.02944	4.02944	6.93293	7.2352	8.16714	7.3344	4.07818	7.41741	-3.33924	-11.1012	2.48084e-06	5.34059e-05	5.40852	gb:BC043808.1 /DB_XREF=gi:27695145 /TID=Xl.8820.1 /CNT=36 /FEA=FLmRNA /TIER=FL+Stack /STK=7 /UG=Xl.8820 /DEF=Xenopus laevis, Similar to calponin 3, acidic, clone MGC:53115 IMAGE:5542465, mRNA, complete cds. /PROD=Similar to calponin 3, acidic /FL=gb:BC043808.1
Xl.26257.1.A1_at	4.31926	3.99826	3.99826	7.49646	7.49076	7.84271	6.9472	4.10526	7.44428	-3.33902	-13.1124	6.50791e-07	2.27876e-05	6.77016	gb:BG884830 /DB_XREF=gi:14261922 /DB_XREF=dac31c07.x1 /CLONE=IMAGE:4408692 /TID=Xl.26257.1 /CNT=3 /FEA=EST /TIER=ConsEnd /STK=1 /UG=Xl.26257 /UG_TITLE=ESTs, Weakly similar to LanC (bacterial lantibiotic synthetase component C)-like 2; testis-specific adriamycin sensitivity protein; G protein-coupled receptor 69B (Homo sapiens) (H.sapiens)
Xl.23972.1.A1_at	4.26142	4.03854	4.03854	7.74609	7.43017	6.94772	7.68272	4.11283	7.45168	-3.33884	-13.4886	5.17408e-07	1.97955e-05	6.9999	gb:CB563307 /DB_XREF=gi:29482837 /DB_XREF=AGENCOURT_13329014 /CLONE=IMAGE:6876343 /TID=Xl.23972.1 /CNT=2 /FEA=EST /TIER=ConsEnd /STK=1 /UG=Xl.23972 /UG_TITLE=ESTs, Weakly similar to junctional adhesion molecule 3 (Homo sapiens) (H.sapiens)
Xl.5573.1.S1_at	6.29085	5.9083	5.9083	9.26391	8.63483	10.0709	9.48196	6.03582	9.36289	-3.32707	-9.97343	5.79169e-06	9.20021e-05	4.53026	gb:BC043772.1 /DB_XREF=gi:27694662 /TID=Xl.5573.1 /CNT=26 /FEA=FLmRNA /TIER=FL+Stack /STK=9 /UG=Xl.5573 /DEF=Xenopus laevis, Similar to katanin p80 (WD40-containing) subunit B 1, clone MGC:52971 IMAGE:4930613, mRNA, complete cds. /PROD=Similar to katanin p80 (WD40-containing) subunitB 1 /FL=gb:BC043772.1
Xl.25723.1.A1_at	4.79264	3.93848	3.93848	8.18245	7.70754	7.26081	7.04982	4.2232	7.55016	-3.32696	-9.69988	7.20327e-06	0.000104854	4.30274	gb:AW782782 /DB_XREF=gi:7797388 /DB_XREF=db23d06.x1 /CLONE=XENOPUS_SOURCE_ID: /TID=Xl.25723.1 /CNT=9 /FEA=EST /TIER=ConsEnd /STK=5 /UG=Xl.25723 /UG_TITLE=ESTs, Moderately similar to IDHG_HUMAN Isocitrate dehydrogenase (NAD) subunit gamma, mitochondrial precursor (Isocitric dehydrogenase) (NAD+-specific ICDH) (H.sapiens)
Xl.16687.1.A1_at	3.78242	4.30639	4.30639	7.15432	7.57867	7.50718	7.57705	4.13174	7.45431	-3.32257	-14.4448	2.96295e-07	1.44878e-05	7.55311	gb:BG552170 /DB_XREF=gi:13563950 /DB_XREF=df47h07.x1 /CLONE=IMAGE:3581797 /TID=Xl.16687.1 /CNT=4 /FEA=EST /TIER=ConsEnd /STK=2 /UG=Xl.16687 /UG_TITLE=ESTs
Xl.6128.1.A1_at	3.28411	4.29788	4.29788	7.12036	7.21177	6.43854	8.35052	3.95996	7.2803	-3.32034	-7.26334	6.54597e-05	0.000441978	1.97467	gb:AW159667 /DB_XREF=gi:6271696 /DB_XREF=zb05d10.x50 /CLONE=zb05d10 /TID=Xl.6128.1 /CNT=5 /FEA=EST /TIER=ConsEnd /STK=3 /UG=Xl.6128 /UG_TITLE=ESTs
Xl.15685.1.A1_at	2.93247	2.64303	2.64303	6.91773	7.00209	5.24062	5.06936	2.73951	6.05745	-3.31794	-6.48766	0.000149119	0.000750188	1.09852	gb:BJ079419 /DB_XREF=gi:17524335 /DB_XREF=BJ079419 /CLONE=XL072f12 /TID=Xl.15685.1 /CNT=2 /FEA=EST /TIER=ConsEnd /STK=2 /UG=Xl.15685 /UG_TITLE=ESTs
Xl.15661.1.A1_at	3.92754	2.6472	2.6472	5.72042	6.745	6.98621	6.11511	3.07398	6.39169	-3.3177	-7.89747	3.50212e-05	0.000296622	2.63829	gb:BF232060 /DB_XREF=gi:11174319 /DB_XREF=dd98e08.x1 /CLONE=IMAGE:3436526 /TID=Xl.15661.1 /CNT=3 /FEA=EST /TIER=ConsEnd /STK=1 /UG=Xl.15661 /UG_TITLE=ESTs, Weakly similar to hypothetical protein FLJ21794 (Homo sapiens) (H.sapiens)
Xl.3502.2.S1_at	5.55217	3.7754	3.7754	7.54927	7.14197	7.95484	8.0803	4.36766	7.6816	-3.31394	-7.15829	7.28963e-05	0.000470874	1.8603	gb:CA974733 /DB_XREF=gi:27507387 /DB_XREF=AGENCOURT_10747980 /CLONE=IMAGE:6327419 /TID=Xl.3502.2 /CNT=19 /FEA=EST /TIER=Stack /STK=8 /UG=Xl.3502 /UG_TITLE=ESTs, Moderately similar to KAP0_HUMAN cAMP-dependent protein kinase type I-alpha regulatory chain (Tissue-specific extinguisher-1) (TSE1) (H.sapiens)
Xl.8380.1.A1_at	3.92754	3.10999	3.10999	6.88668	6.50723	6.54568	6.83297	3.38251	6.69314	-3.31063	-12.484	9.67911e-07	2.99635e-05	6.36985	gb:BF072358 /DB_XREF=gi:10848997 /DB_XREF=db55h10.x1 /CLONE=IMAGE:3302467 /TID=Xl.8380.1 /CNT=8 /FEA=EST /TIER=ConsEnd /STK=3 /UG=Xl.8380 /UG_TITLE=ESTs, Weakly similar to RM03_HUMAN Mitochondrial 60S ribosomal protein L3 (H.sapiens)
Xl.21992.1.S1_at	6.78246	7.18255	7.18255	10.0324	10.4711	10.4612	10.4381	7.04918	10.3507	-3.30152	-14.9921	2.18644e-07	1.21236e-05	7.85138	gb:BC042264.1 /DB_XREF=gi:27769164 /TID=Xl.21992.1 /CNT=15 /FEA=mRNA /TIER=ConsEnd /STK=0 /UG=Xl.21992 /UG_TITLE=Xenopus laevis, Similar to activated RNA polymerase II transcription cofactor 4, clone IMAGE:5571585, mRNA /DEF=Xenopus laevis, Similar to activated RNA polymerase II transcription cofactor 4, clone IMAGE:5571585, mRNA.
Xl.24770.1.A1_at	3.25605	3.84191	3.84191	7.82539	7.29557	5.91562	6.74538	3.64662	6.94549	-3.29887	-7.66323	4.39182e-05	0.000341504	2.39837	gb:BI313325 /DB_XREF=gi:14987652 /DB_XREF=daf93h09.x1 /CLONE=IMAGE:4757633 /TID=Xl.24770.1 /CNT=4 /FEA=EST /TIER=ConsEnd /STK=2 /UG=Xl.24770 /UG_TITLE=ESTs, Moderately similar to uncharacterized hypothalamus protein HT010 (Homo sapiens) (H.sapiens)
Xl.6008.1.S1_at	3.11937	4.42672	4.42672	7.98031	7.67242	6.24926	7.25608	3.99094	7.28952	-3.29858	-6.90683	9.47696e-05	0.000555321	1.58119	gb:BC041724.1 /DB_XREF=gi:27469684 /TID=Xl.6008.1 /CNT=23 /FEA=FLmRNA /TIER=FL /STK=5 /UG=Xl.6008 /DEF=Xenopus laevis, Similar to U5 snRNP-specific protein, 116 kD, clone MGC:52678 IMAGE:4682533, mRNA, complete cds. /PROD=Similar to U5 snRNP-specific protein, 116 kD /FL=gb:BC041724.1
Xl.19656.1.S1_at	5.9487	5.47275	5.47275	9.75774	8.94935	8.64471	8.36304	5.6314	8.92871	-3.29731	-9.62938	7.62628e-06	0.00010894	4.24311	gb:BQ397830 /DB_XREF=gi:21085517 /DB_XREF=NISC_mo02d07.x1 /CLONE=IMAGE:5162149 /TID=Xl.19656.1 /CNT=4 /FEA=EST /TIER=ConsEnd /STK=2 /UG=Xl.19656 /UG_TITLE=ESTs
Xl.7510.1.A1_at	4.04409	5.19229	5.19229	8.49351	8.24397	7.8467	7.8431	4.80956	8.10682	-3.29726	-9.78861	6.70745e-06	0.000100306	4.37719	gb:BF232120 /DB_XREF=gi:11174442 /DB_XREF=dd99d10.x1 /CLONE=IMAGE:3436483 /TID=Xl.7510.1 /CNT=2 /FEA=EST /TIER=ConsEnd /STK=2 /UG=Xl.7510 /UG_TITLE=ESTs
Xl.17979.1.A1_at	4.30426	4.42126	4.42126	7.44098	6.7812	8.31302	8.16994	4.38226	7.67629	-3.29402	-8.92408	1.37735e-05	0.000160925	3.62333	gb:BG816777 /DB_XREF=gi:14187757 /DB_XREF=daf70a10.x1 /CLONE=IMAGE:4755354 /TID=Xl.17979.1 /CNT=2 /FEA=EST /TIER=ConsEnd /STK=0 /UG=Xl.17979 /UG_TITLE=ESTs
Xl.15550.1.A1_at	2.32438	3.40834	3.40834	7.91205	7.48123	7.02491	2.92777	3.04702	6.33649	-3.28948	-3.02647	0.015374	0.0281747	-3.79452	gb:BJ085610 /DB_XREF=gi:17581667 /DB_XREF=BJ085610 /CLONE=XL106h15 /TID=Xl.15550.1 /CNT=2 /FEA=EST /TIER=ConsEnd /STK=1 /UG=Xl.15550 /UG_TITLE=ESTs, Weakly similar to TXTP_HUMAN Tricarboxylate transport protein, mitochondrial precursor (Citrate transport protein) (CTP) (Tricarboxylate carrier protein) (H.sapiens)
Xl.8261.1.S1_at	2.34679	2.71799	2.71799	5.80162	5.46766	6.16835	6.09504	2.59426	5.88317	-3.28891	-13.5189	5.08061e-07	1.97131e-05	7.01811	gb:AW148114 /DB_XREF=gi:6196010 /DB_XREF=da04c06.x1 /CLONE=XENOPUS_SOURCE_ID:xlnoc001n11 /TID=Xl.8261.1 /CNT=9 /FEA=EST /TIER=ConsEnd /STK=2 /UG=Xl.8261 /UG_TITLE=ESTs, Weakly similar to serologically defined colon cancer antigen 28; similar to phosphatidylcholine transfer protein 2 (Homo sapiens) (H.sapiens)
Xl.13880.1.A1_at	3.21708	2.88607	2.88607	6.89801	7.04114	4.94394	6.25813	2.99641	6.28531	-3.28889	-6.91456	9.39986e-05	0.000552455	1.58988	gb:BJ077066 /DB_XREF=gi:17521982 /DB_XREF=BJ077066 /CLONE=XL059m08 /TID=Xl.13880.1 /CNT=6 /FEA=EST /TIER=ConsEnd /STK=1 /UG=Xl.13880 /UG_TITLE=ESTs, Moderately similar to translocase of inner mitochondrial membrane 44 homolog (yeast); mitochondrial inner membrane translocase (Homo sapiens) (H.sapiens)
Xl.3651.1.S1_at	7.26539	7.15866	7.15866	10.3379	10.9347	10.7108	9.94181	7.19423	10.4813	-3.28705	-12.2842	1.10231e-06	3.29878e-05	6.23803	gb:CB756206 /DB_XREF=gi:29835711 /DB_XREF=AGENCOURT_13003296 /CLONE=IMAGE:6873682 /TID=Xl.3651.1 /CNT=43 /FEA=mRNA /TIER=Stack /STK=6 /UG=Xl.3651 /UG_TITLE=Xenopus laevis peptidyl-prolyl cis-trans isomerase B mRNA, partial cds
Xl.15887.1.S1_x_at	4.14382	3.67406	3.67406	8.09727	7.81298	5.42071	7.12546	3.83065	7.1141	-3.28346	-5.63077	0.000402701	0.00151243	0.0397014	gb:BJ088835 /DB_XREF=gi:17586276 /DB_XREF=BJ088835 /CLONE=XL095e10 /TID=Xl.15887.1 /CNT=3 /FEA=EST /TIER=ConsEnd /STK=2 /UG=Xl.15887 /UG_TITLE=ESTs, Moderately similar to T14797 hypothetical protein DKFZp564B167.1 - human (H.sapiens)
Xl.6499.2.A1_at	4.8571	5.27514	5.27514	8.37945	8.15548	8.19494	8.93937	5.1358	8.41731	-3.28152	-12.6919	8.47116e-07	2.69977e-05	6.50465	gb:BJ053766 /DB_XREF=gi:17422501 /DB_XREF=BJ053766 /CLONE=XL048c10 /TID=Xl.6499.2 /CNT=22 /FEA=EST /TIER=Stack /STK=17 /UG=Xl.6499 /UG_TITLE=Xenopus laevis, Similar to carnitine palmitoyltransferase 1, clone MGC:53498 IMAGE:5572476, mRNA, complete cds
Xl.13372.1.A1_at	7.80731	7.3834	7.3834	11.3298	11.4625	10.2166	10.2148	7.5247	10.8059	-3.28122	-8.87282	1.43998e-05	0.000165714	3.57656	gb:BJ051530 /DB_XREF=gi:17495900 /DB_XREF=BJ051530 /CLONE=XL035b23 /TID=Xl.13372.1 /CNT=2 /FEA=EST /TIER=ConsEnd /STK=2 /UG=Xl.13372 /UG_TITLE=ESTs, Moderately similar to leucine zipper-EF-hand containing transmembrane protein 1 (Homo sapiens) (H.sapiens)
Xl.24384.2.S1_at	3.92754	5.89971	5.89971	8.69766	8.70962	8.42712	8.25763	5.24232	8.52301	-3.28069	-6.98495	8.72852e-05	0.000524526	1.66872	gb:BI314483 /DB_XREF=gi:14988810 /DB_XREF=dae13a03.x1 /CLONE=IMAGE:4673932 /TID=Xl.24384.2 /CNT=19 /FEA=EST /TIER=ConsEnd /STK=1 /UG=Xl.24384 /UG_TITLE=ESTs, Moderately similar to MO2L_HUMAN MO25-like protein (H.sapiens)
Xl.7718.1.A1_at	6.27952	6.86688	6.86688	9.86334	9.89911	10.0436	9.99715	6.6711	9.95081	-3.27971	-14.8015	2.4277e-07	1.29084e-05	7.74893	gb:BJ044375 /DB_XREF=gi:17397866 /DB_XREF=BJ044375 /CLONE=XL013b23 /TID=Xl.7718.1 /CNT=15 /FEA=EST /TIER=Stack /STK=10 /UG=Xl.7718 /UG_TITLE=ESTs, Weakly similar to barr-P1 (Drosophila melanogaster) (D.melanogaster)
Xl.3740.1.A1_at	2.59167	4.04159	4.04159	6.91101	6.09742	7.0266	7.30228	3.55829	6.83433	-3.27604	-7.63854	4.49927e-05	0.000346574	2.37273	gb:BI446365 /DB_XREF=gi:15271072 /DB_XREF=dai87e07.x1 /CLONE=IMAGE:5047404 /TID=Xl.3740.1 /CNT=4 /FEA=EST /TIER=ConsEnd /STK=3 /UG=Xl.3740 /UG_TITLE=ESTs, Moderately similar to TSC1 gene (hamartin); hamartin; tuberous sclerosis 1 (Homo sapiens) (H.sapiens)
Xl.15892.1.S1_at	7.43564	7.79484	7.79484	10.8148	11.045	11.0956	10.8194	7.67511	10.9437	-3.26861	-15.907	1.34555e-07	1.01668e-05	8.32251	gb:BC044034.1 /DB_XREF=gi:27696964 /TID=Xl.15892.1 /CNT=27 /FEA=FLmRNA /TIER=FL /STK=1 /UG=Xl.15892 /DEF=Xenopus laevis, Similar to COP9 (constitutive photomorphogenic) homolog, subunit 3 (Arabidopsis thaliana), clone MGC:53451 IMAGE:5572001, mRNA, complete cds. /PROD=Similar to COP9 (constitutive photomorphogenic)homolog, subunit 3 (Arabidopsis thaliana) /FL=gb:BC044034.1
Xl.13043.1.S1_at	6.91008	6.50914	6.50914	10.5013	10.0734	9.16088	9.90417	6.64279	9.90993	-3.26714	-10.1394	5.08632e-06	8.59064e-05	4.66544	gb:BJ097330 /DB_XREF=gi:17598635 /DB_XREF=BJ097330 /CLONE=XL141d04 /TID=Xl.13043.1 /CNT=8 /FEA=EST /TIER=ConsEnd /STK=2 /UG=Xl.13043 /UG_TITLE=ESTs
Xl.4868.1.A1_at	4.50124	3.93587	3.93587	7.68794	7.55929	7.10262	7.21597	4.12433	7.39145	-3.26712	-13.0832	6.62646e-07	2.29369e-05	6.75203	gb:BJ052242 /DB_XREF=gi:17496312 /DB_XREF=BJ052242 /CLONE=XL040n20 /TID=Xl.4868.1 /CNT=15 /FEA=EST /TIER=ConsEnd /STK=1 /UG=Xl.4868 /UG_TITLE=ESTs, Moderately similar to C56205 transcription factor LBP1c - human (H.sapiens)
Xl.5049.1.S1_at	4.56887	2.99959	2.99959	7.7394	7.00157	4.97916	7.4366	3.52268	6.78918	-3.2665	-4.78909	0.00117631	0.00340814	-1.10102	gb:BE508263 /DB_XREF=gi:9728038 /DB_XREF=dc08g02.x1 /CLONE=IMAGE:3396530 /TID=Xl.5049.1 /CNT=5 /FEA=EST /TIER=ConsEnd /STK=1 /UG=Xl.5049 /UG_TITLE=ESTs
Xl.23876.1.A1_at	4.05551	4.55684	4.55684	7.53822	7.05864	7.81135	8.20118	4.38973	7.65235	-3.26261	-10.8118	3.0608e-06	6.13346e-05	5.19188	gb:AW639081 /DB_XREF=gi:7396257 /DB_XREF=bl78c07.w1 /CLONE=PBX0078C07 /TID=Xl.23876.1 /CNT=8 /FEA=EST /TIER=ConsEnd /STK=0 /UG=Xl.23876 /UG_TITLE=ESTs, Weakly similar to phosphatidylinositol 4-kinase, catalytic, beta polypeptide (Homo sapiens) (H.sapiens)
Xl.418.1.S2_at	2.91671	4.78156	4.78156	7.26002	7.1122	7.10906	8.17596	4.15994	7.41431	-3.25437	-6.56094	0.000137555	0.000709395	1.1845	gb:BQ383980 /DB_XREF=gi:21071667 /DB_XREF=NISC_mn04c04.x1 /CLONE=IMAGE:5048839 /TID=Xl.418.1 /CNT=26 /FEA=FLmRNA /TIER=ConsEnd /STK=0 /UG=Xl.418 /UG_TITLE=Xenopus laevis nuclear YCCAAT-box binding factor A subunit NF-YA mRNA, complete cds /FL=gb:AF041203.1
Xl.16293.1.A1_at	4.18219	3.83793	3.83793	7.86724	6.16921	6.96444	7.82642	3.95268	7.20683	-3.25414	-7.84453	3.68427e-05	0.000306585	2.58458	gb:BJ043716 /DB_XREF=gi:17419569 /DB_XREF=BJ043716 /CLONE=XL010o13 /TID=Xl.16293.1 /CNT=8 /FEA=EST /TIER=Stack /STK=6 /UG=Xl.16293 /UG_TITLE=ESTs, Moderately similar to tetratricopeptide repeat domain 2 (Homo sapiens) (H.sapiens)
Xl.8473.1.S1_at	5.6331	4.1723	4.1723	7.38019	8.4764	8.94927	6.84234	4.65924	7.91205	-3.25281	-5.7105	0.000365675	0.00141303	0.142491	gb:BC051009.1 /DB_XREF=gi:29835251 /TID=Xl.8473.1 /CNT=19 /FEA=FLmRNA /TIER=FL /STK=5 /UG=Xl.8473 /DEF=Xenopus laevis, Similar to HLA-B associated transcript 2, clone MGC:53506 IMAGE:5572515, mRNA, complete cds. /PROD=Similar to HLA-B associated transcript 2 /FL=gb:BC051009.1
Xl.7574.1.A1_at	4.78156	3.26707	3.26707	6.48121	6.71357	7.44844	7.45457	3.7719	7.02445	-3.25255	-7.47351	5.29656e-05	0.000387706	2.19961	gb:BI347474 /DB_XREF=gi:15040751 /DB_XREF=dac32h07.x3 /CLONE=IMAGE:4408933 /TID=Xl.7574.1 /CNT=7 /FEA=EST /TIER=ConsEnd /STK=5 /UG=Xl.7574 /UG_TITLE=ESTs, Moderately similar to S24C_HUMAN Protein transport protein Sec24C (SEC24-related protein C) (H.sapiens)
Xl.7423.1.A1_at	5.59931	3.63992	3.63992	7.65735	7.46674	6.50542	8.54769	4.29305	7.5443	-3.25125	-5.46874	0.000491196	0.0017509	-0.171961	gb:BG022706 /DB_XREF=gi:12478785 /DB_XREF=dab07f02.x1 /CLONE=IMAGE:4173819 /TID=Xl.7423.1 /CNT=6 /FEA=EST /TIER=Stack /STK=6 /UG=Xl.7423 /UG_TITLE=ESTs
Xl.8354.1.S1_at	6.77272	5.74505	5.74505	9.11999	9.0433	9.42211	9.75696	6.08761	9.33559	-3.24799	-10.1601	5.00542e-06	8.47894e-05	4.68212	gb:AW767906 /DB_XREF=gi:7699919 /DB_XREF=da82a01.x1 /CLONE=IMAGE:3201384 /TID=Xl.8354.1 /CNT=42 /FEA=EST /TIER=Stack /STK=11 /UG=Xl.8354 /UG_TITLE=ESTs, Highly similar to SMD1_HUMAN Small nuclear ribonucleoprotein Sm D1 (snRNP core protein D1) (Sm-D1) (Sm-D autoantigen) (H.sapiens)
Xl.12363.1.A1_at	5.82839	3.92206	3.92206	7.52876	7.69145	7.62169	8.37854	4.5575	7.80511	-3.24761	-6.77149	0.000109464	0.000609695	1.42776	gb:BJ085598 /DB_XREF=gi:17581650 /DB_XREF=BJ085598 /CLONE=XL106h02 /TID=Xl.12363.1 /CNT=3 /FEA=EST /TIER=ConsEnd /STK=2 /UG=Xl.12363 /UG_TITLE=ESTs
Xl.16401.1.A1_x_at	2.77435	5.00048	5.00048	7.7598	7.04778	7.68425	7.52149	4.25843	7.50333	-3.24489	-6.1241	0.00022472	0.0010062	0.661471	gb:BF610858 /DB_XREF=gi:11779921 /DB_XREF=dd96g11.x1 /CLONE=IMAGE:3436604 /TID=Xl.16401.1 /CNT=7 /FEA=EST /TIER=ConsEnd /STK=5 /UG=Xl.16401 /UG_TITLE=ESTs, Weakly similar to cyclin B3, isoform 3 (Homo sapiens) (H.sapiens)
Xl.3139.1.A1_at	6.10512	6.48872	6.48872	11.0371	11.1395	7.60199	8.64239	6.36085	9.60523	-3.24438	-3.92589	0.00392758	0.00907062	-2.37556	gb:BG552322 /DB_XREF=gi:13564102 /DB_XREF=df38h09.x1 /CLONE=IMAGE:3581032 /TID=Xl.3139.1 /CNT=7 /FEA=EST /TIER=ConsEnd /STK=5 /UG=Xl.3139 /UG_TITLE=ESTs, Highly similar to S71820 JUN-activation-domain-binding protein 1 - human (H.sapiens)
Xl.24330.1.S1_at	4.9644	3.64533	3.64533	7.77623	7.59689	7.01217	6.93073	4.08502	7.329	-3.24399	-8.42153	2.15007e-05	0.00021661	3.15415	gb:BG023352 /DB_XREF=gi:12479431 /DB_XREF=dg40d01.x1 /CLONE=IMAGE:3751321 /TID=Xl.24330.1 /CNT=11 /FEA=EST /TIER=ConsEnd /STK=1 /UG=Xl.24330 /UG_TITLE=ESTs, Moderately similar to prefoldin 5; myc modulator-1; c-myc binding protein (Homo sapiens) (H.sapiens)
Xl.4898.1.S1_at	8.1376	8.10485	8.10485	11.8519	11.5977	10.6065	11.3808	8.11576	11.3592	-3.24345	-10.7171	3.2822e-06	6.38917e-05	5.11971	gb:BC045263.1 /DB_XREF=gi:28278107 /TID=Xl.4898.1 /CNT=9 /FEA=FLmRNA /TIER=FL /STK=2 /UG=Xl.4898 /DEF=Xenopus laevis, Similar to inhibitor of growth family, member 3, clone MGC:52705 IMAGE:4682759, mRNA, complete cds. /PROD=Similar to inhibitor of growth family, member 3 /FL=gb:BC045263.1
Xl.23836.1.S1_at	8.81087	7.5161	7.5161	11.8827	11.8097	9.94591	11.1194	7.94769	11.1894	-3.24174	-6.176	0.00021173	0.0009665	0.724939	gb:BG161848 /DB_XREF=gi:12695767 /DB_XREF=df69c07.x1 /CLONE=IMAGE:3744397 /TID=Xl.23836.1 /CNT=21 /FEA=EST /TIER=Stack /STK=13 /UG=Xl.23836 /UG_TITLE=ESTs, Highly similar to RS28_HUMAN 40S ribosomal protein S28 (H.sapiens)
Xl.10343.1.A1_at	6.51288	5.38469	5.38469	8.27137	9.20759	9.36199	9.16844	5.76075	9.00235	-3.24159	-8.63649	1.77255e-05	0.00019026	3.35778	gb:BU908416 /DB_XREF=gi:24090330 /DB_XREF=AGENCOURT_10509470 /CLONE=IMAGE:6633850 /TID=Xl.10343.1 /CNT=5 /FEA=EST /TIER=ConsEnd /STK=3 /UG=Xl.10343 /UG_TITLE=ESTs, Weakly similar to T22938 hypothetical protein F58G11.5 - Caenorhabditis elegans (C.elegans)
Xl.22457.1.A1_at	5.59931	5.86986	5.86986	9.09508	8.89942	8.92067	9.15924	5.77968	9.0186	-3.23893	-16.4951	9.98362e-08	9.07353e-06	8.60865	gb:BF072332 /DB_XREF=gi:10848971 /DB_XREF=db55e10.x1 /CLONE=IMAGE:3302442 /TID=Xl.22457.1 /CNT=4 /FEA=EST /TIER=ConsEnd /STK=1 /UG=Xl.22457 /UG_TITLE=ESTs, Weakly similar to SRPB_MOUSE Signal recognition particle receptor beta subunit (SR-beta) (M.musculus)
Xl.26162.1.S1_at	6.36552	6.18023	6.18023	9.17398	9.38122	9.45523	9.88999	6.242	9.4751	-3.23311	-14.1618	3.48165e-07	1.5559e-05	7.39382	gb:CD360147 /DB_XREF=gi:31131558 /DB_XREF=AGENCOURT_14238282 /CLONE=IMAGE:6957141 /TID=Xl.26162.1 /CNT=50 /FEA=mRNA /TIER=Stack /STK=9 /UG=Xl.26162 /UG_TITLE=Xenopus laevis mRNA for enolase
Xl.3522.1.A1_at	6.1475	5.62165	5.62165	9.08175	9.15523	8.95704	8.92481	5.79693	9.02971	-3.23278	-14.9289	2.26335e-07	1.23472e-05	7.81758	gb:BJ085787 /DB_XREF=gi:17581925 /DB_XREF=BJ085787 /CLONE=XL051a22 /TID=Xl.3522.1 /CNT=7 /FEA=EST /TIER=Stack /STK=6 /UG=Xl.3522 /UG_TITLE=ESTs
Xl.5076.1.S1_at	3.0551	3.20415	3.20415	5.30438	6.36573	7.23141	6.64742	3.15447	6.38724	-3.23277	-7.89861	3.49833e-05	0.000296519	2.63944	gb:BG486062 /DB_XREF=gi:13433639 /DB_XREF=dab10h09.x1 /CLONE=IMAGE:4174312 /TID=Xl.5076.1 /CNT=8 /FEA=EST /TIER=ConsEnd /STK=1 /UG=Xl.5076 /UG_TITLE=ESTs
Xl.4632.1.A1_at	3.06606	5.7562	5.7562	8.7063	7.49546	8.25763	7.90942	4.85949	8.0922	-3.23272	-4.99262	0.000899375	0.00275596	-0.815782	gb:BJ086716 /DB_XREF=gi:17583232 /DB_XREF=BJ086716 /CLONE=XL053o21 /TID=Xl.4632.1 /CNT=5 /FEA=EST /TIER=ConsEnd /STK=3 /UG=Xl.4632 /UG_TITLE=ESTs
Xl.26153.1.A1_at	4.21709	4.08148	4.08148	7.16708	6.96965	7.78395	7.51474	4.12668	7.35886	-3.23217	-13.223	6.07982e-07	2.16853e-05	6.83844	gb:BQ387099 /DB_XREF=gi:21074786 /DB_XREF=NISC_mn21h10.x1 /CLONE=IMAGE:5074410 /TID=Xl.26153.1 /CNT=2 /FEA=EST /TIER=ConsEnd /STK=1 /UG=Xl.26153 /UG_TITLE=ESTs
Xl.14693.1.A1_at	5.01585	4.24853	4.24853	7.60114	7.86556	7.86724	7.60559	4.5043	7.73488	-3.23058	-12.8076	7.87223e-07	2.58322e-05	6.57864	gb:CB945185 /DB_XREF=gi:30194179 /DB_XREF=AGENCOURT_13851226 /CLONE=IMAGE:6932712 /TID=Xl.14693.1 /CNT=3 /FEA=EST /TIER=ConsEnd /STK=1 /UG=Xl.14693 /UG_TITLE=ESTs
Xl.8111.1.S1_at	4.93879	4.91089	4.91089	8.94251	7.53329	7.76334	8.36042	4.92019	8.14989	-3.2297	-9.53535	8.23394e-06	0.000114211	4.16295	gb:BJ099562 /DB_XREF=gi:17601917 /DB_XREF=BJ099562 /CLONE=XL151c08 /TID=Xl.8111.1 /CNT=32 /FEA=mRNA /TIER=Stack /STK=9 /UG=Xl.8111 /UG_TITLE=Xenopus laevis, Similar to hepatitis B virus x interacting protein, clone IMAGE:4682509, mRNA
Xl.23860.1.S1_at	5.43324	6.36445	6.36445	9.82258	9.9228	9.31232	8.07713	6.05405	9.28371	-3.22966	-6.88102	9.73956e-05	0.000565801	1.5521	gb:BM191804 /DB_XREF=gi:17527767 /DB_XREF=dag36e11.x3 /CLONE=IMAGE:4783581 /TID=Xl.23860.1 /CNT=13 /FEA=EST /TIER=ConsEnd /STK=3 /UG=Xl.23860 /UG_TITLE=ESTs, Weakly similar to hypothetical protein LOC51319 (Homo sapiens) (H.sapiens)
Xl.18593.1.A1_at	4.18219	3.04127	3.04127	7.41321	6.01068	6.46777	6.71298	3.42158	6.65116	-3.22958	-8.01038	3.14597e-05	0.00027527	2.75184	gb:BI443011 /DB_XREF=gi:15267718 /DB_XREF=dae53b06.x3 /CLONE=IMAGE:4677826 /TID=Xl.18593.1 /CNT=2 /FEA=EST /TIER=ConsEnd /STK=1 /UG=Xl.18593 /UG_TITLE=ESTs
Xl.2125.1.S1_at	5.48279	6.0715	6.0715	9.53443	9.14982	8.81874	8.90569	5.87526	9.10217	-3.22691	-12.2882	1.09945e-06	3.29878e-05	6.24067	gb:BI442833 /DB_XREF=gi:15267540 /DB_XREF=dai91a04.y1 /CLONE=IMAGE:5047590 /TID=Xl.2125.1 /CNT=5 /FEA=EST /TIER=ConsEnd /STK=0 /UG=Xl.2125 /UG_TITLE=ESTs, Moderately similar to ACBP_HUMAN Acyl-CoA-binding protein (ACBP) (Diazepam binding inhibitor) (DBI) (Endozepine) (EP) (H.sapiens)
Xl.5377.2.S1_at	5.13267	5.16625	5.16625	8.32252	8.46442	8.13274	8.59521	5.15506	8.37872	-3.22366	-16.1257	1.20276e-07	9.75899e-06	8.43039	gb:BQ400417 /DB_XREF=gi:21088104 /DB_XREF=NISC_mp09b09.y1 /CLONE=IMAGE:4968904 /TID=Xl.5377.2 /CNT=14 /FEA=EST /TIER=Stack /STK=6 /UG=Xl.5377 /UG_TITLE=Xenopus laevis, Similar to procollagen-proline, 2-oxoglutarate 4-dioxygenase (proline 4-hydroxylase), beta polypeptide (protein disulfide isomerase; thyroid hormone binding protein p55), clone IMAGE:5542045, mRNA, partial cds
Xl.12975.1.S1_at	2.95372	5.54998	5.54998	8.33005	7.87402	7.99262	7.43016	4.68456	7.90671	-3.22215	-5.29515	0.00061013	0.0020622	-0.402894	gb:AW460780 /DB_XREF=gi:7030997 /DB_XREF=da36c07.x1 /CLONE=IMAGE:2943180 /TID=Xl.12975.1 /CNT=19 /FEA=EST /TIER=Stack /STK=6 /UG=Xl.12975 /UG_TITLE=ESTs, Moderately similar to CSL4_HUMAN 3-5 exoribonuclease CSL4 homolog (CGI-108) (H.sapiens)
Xl.8873.1.A1_at	3.06606	2.6472	2.6472	6.88668	6.33619	4.69473	6.11511	2.78682	6.00818	-3.22135	-6.86403	9.91676e-05	0.000572332	1.53291	gb:U35728.1 /DB_XREF=gi:1016757 /GEN=xl-mtTFA /TID=Xl.8873.1 /CNT=9 /FEA=FLmRNA /TIER=FL /STK=1 /UG=Xl.8873 /DEF=Xenopus laevis transcription factor A (xl-mtTFA) mRNA, nuclear gene encoding mitochondrial protein, complete cds. /PROD=transcription factor A /FL=gb:U35728.1
Xl.8573.2.S1_at	5.7969	5.1604	5.1604	8.37867	8.34285	8.24464	9.4082	5.37256	8.59359	-3.22103	-9.62078	7.67971e-06	0.000109295	4.23582	gb:CB562525 /DB_XREF=gi:29482055 /DB_XREF=AGENCOURT_13324668 /CLONE=IMAGE:6879123 /TID=Xl.8573.2 /CNT=56 /FEA=EST /TIER=Stack /STK=7 /UG=Xl.8573 /UG_TITLE=Xenopus laevis, clone IMAGE:5542374, mRNA, partial cds
Xl.26278.1.A1_at	3.21813	4.30639	4.30639	7.28534	5.91891	7.19315	8.25991	3.94364	7.16433	-3.22069	-6.11894	0.000226059	0.00101023	0.655141	gb:CD326737 /DB_XREF=gi:31091068 /DB_XREF=AGENCOURT_14144638 /CLONE=IMAGE:6947823 /TID=Xl.26278.1 /CNT=4 /FEA=EST /TIER=ConsEnd /STK=1 /UG=Xl.26278 /UG_TITLE=ESTs
Xl.25179.1.S1_at	6.03506	4.23421	4.23421	8.31925	8.26696	7.83889	7.79363	4.8345	8.05468	-3.22019	-7.26016	6.56721e-05	0.000442913	1.97122	gb:BI313791 /DB_XREF=gi:14988118 /DB_XREF=dai32h08.x1 /CLONE=IMAGE:4963455 /TID=Xl.25179.1 /CNT=43 /FEA=EST /TIER=Stack /STK=8 /UG=Xl.25179 /UG_TITLE=ESTs, Weakly similar to HG2A_HUMAN HLA class II histocompatibility antigen, gamma chain (HLA-DR antigens associated invariant chain) (P33) (CD74 antigen) (H.sapiens)
Xl.23654.1.A1_at	4.44875	5.29568	5.29568	8.30518	7.62535	8.67073	8.3282	5.01337	8.23237	-3.219	-9.96148	5.8465e-06	9.26191e-05	4.52044	gb:BG552296 /DB_XREF=gi:13564076 /DB_XREF=df38d02.x1 /CLONE=IMAGE:3580826 /TID=Xl.23654.1 /CNT=5 /FEA=EST /TIER=ConsEnd /STK=3 /UG=Xl.23654 /UG_TITLE=ESTs
Xl.22613.1.S1_at	3.28245	5.52165	5.52165	8.51764	8.49879	6.58768	8.37221	4.77525	7.99408	-3.21883	-4.82501	0.00112139	0.00328215	-1.05024	gb:BJ088224 /DB_XREF=gi:17585405 /DB_XREF=BJ088224 /CLONE=XL092e01 /TID=Xl.22613.1 /CNT=8 /FEA=EST /TIER=ConsEnd /STK=3 /UG=Xl.22613 /UG_TITLE=ESTs, Highly similar to MCT-1 protein (Homo sapiens) (H.sapiens)
Xl.1785.1.S1_at	5.78201	4.93647	4.93647	9.43535	9.319	6.45415	8.53584	5.21832	8.43608	-3.21777	-4.75028	0.00123894	0.00354754	-1.1561	gb:BC041557.1 /DB_XREF=gi:27371214 /TID=Xl.1785.1 /CNT=9 /FEA=FLmRNA /TIER=FL /STK=4 /UG=Xl.1785 /DEF=Xenopus laevis, Similar to RNA processing factor 1, clone MGC:53934 IMAGE:5570147, mRNA, complete cds. /PROD=Similar to RNA processing factor 1 /FL=gb:BC041557.1
Xl.553.1.S1_at	3.11816	4.84027	4.84027	7.68935	7.76179	7.32187	7.15215	4.26623	7.48129	-3.21506	-7.45945	5.37141e-05	0.000392243	2.18472	gb:AF183394.1 /DB_XREF=gi:6007765 /GEN=CKIe /TID=Xl.553.1 /CNT=54 /FEA=FLmRNA /TIER=FL+Stack /STK=7 /UG=Xl.553 /DEF=Xenopus laevis casein kinase I epsilon (CKIe) mRNA, complete cds. /PROD=casein kinase I epsilon /FL=gb:AF183394.1
Xl.16209.1.A1_at	4.94629	5.06323	5.06323	8.8927	8.9097	8.47494	6.67327	5.02425	8.23765	-3.2134	-6.23281	0.000198446	0.000925733	0.793996	gb:BJ048463 /DB_XREF=gi:17408879 /DB_XREF=BJ048463 /CLONE=XL019p01 /TID=Xl.16209.1 /CNT=3 /FEA=EST /TIER=ConsEnd /STK=1 /UG=Xl.16209 /UG_TITLE=ESTs
Xl.8361.1.A1_at	5.21751	5.83647	5.83647	8.53378	8.50422	9.04096	9.281	5.63015	8.83999	-3.20984	-11.3602	2.06394e-06	4.75037e-05	5.59766	gb:BQ384190 /DB_XREF=gi:21071877 /DB_XREF=NISC_mn05d02.x1 /CLONE=IMAGE:5049242 /TID=Xl.8361.1 /CNT=11 /FEA=EST /TIER=Stack /STK=6 /UG=Xl.8361 /UG_TITLE=ESTs, Weakly similar to similar to vaccinia virus HindIII K4L ORF (Homo sapiens) (H.sapiens)
Xl.16610.1.A1_at	5.07137	5.43251	5.43251	7.93382	8.6588	8.52393	8.97132	5.31213	8.52197	-3.20984	-11.5787	1.77227e-06	4.39428e-05	5.75387	gb:BJ049753 /DB_XREF=gi:17379154 /DB_XREF=BJ049753 /CLONE=XL021a15 /TID=Xl.16610.1 /CNT=3 /FEA=EST /TIER=ConsEnd /STK=2 /UG=Xl.16610 /UG_TITLE=ESTs
Xl.3001.1.A1_at	5.74077	4.30639	4.30639	8.67996	7.04778	8.5159	7.7303	4.78452	7.99348	-3.20897	-6.49438	0.000148016	0.00074658	1.10643	gb:BJ055233 /DB_XREF=gi:17423217 /DB_XREF=BJ055233 /CLONE=XL047o10 /TID=Xl.3001.1 /CNT=6 /FEA=EST /TIER=ConsEnd /STK=2 /UG=Xl.3001 /UG_TITLE=ESTs, Moderately similar to S58891 collapsin response mediator protein 2 - human (H.sapiens)
Xl.19503.1.A1_at	3.78345	3.08124	3.08124	6.69239	6.73751	6.72577	5.92222	3.31531	6.51947	-3.20416	-10.8427	2.99221e-06	6.10375e-05	5.21529	gb:BJ077975 /DB_XREF=gi:17522891 /DB_XREF=BJ077975 /CLONE=XL062l04 /TID=Xl.19503.1 /CNT=2 /FEA=EST /TIER=ConsEnd /STK=1 /UG=Xl.19503 /UG_TITLE=ESTs, Moderately similar to CN03_HUMAN Protein C14orf3 (Protein HSPC322) (H.sapiens)
Xl.8880.1.S1_at	5.34387	6.29196	6.29196	9.08825	8.36004	9.51365	9.75682	5.97593	9.17969	-3.20376	-8.25343	2.50748e-05	0.000238003	2.99174	gb:BC046738.1 /DB_XREF=gi:28436919 /TID=Xl.8880.1 /CNT=46 /FEA=FLmRNA /TIER=FL+Stack /STK=9 /UG=Xl.8880 /DEF=Xenopus laevis, Similar to ATPase, H+ transporting, lysosomal (vacuolar proton pump), beta 5658 kDa, isoform 2, clone MGC:53822 IMAGE:5542270, mRNA, complete cds. /PROD=Similar to ATPase, H+ transporting, lysosomal(vacuolar proton pump), beta 5658 kDa, isoform 2 /FL=gb:BC046738.1
Xl.3792.1.S1_x_at	6.98589	6.73012	6.73012	9.74312	9.48184	9.81622	11.0102	6.81538	10.0128	-3.19746	-8.85062	1.46809e-05	0.000167106	3.55623	gb:U10108.1 /DB_XREF=gi:499225 /TID=Xl.3792.1 /CNT=93 /FEA=FLmRNA /TIER=FL+Stack /STK=17 /UG=Xl.3792 /DEF=Xenopus laevis Na+-K+-ATPase alpha 1 subunit mRNA, complete cds. /PROD=Na+-K+-ATPase alpha 1 subunit /FL=gb:U49238.1 gb:U10108.1
Xl.6053.1.A1_at	6.36552	5.7562	5.7562	9.52755	9.50475	8.6082	8.97132	5.95931	9.15295	-3.19365	-10.6571	3.43162e-06	6.55776e-05	5.07367	gb:AW767401 /DB_XREF=gi:7699405 /DB_XREF=da68f05.y1 /CLONE=IMAGE:3200097 /TID=Xl.6053.1 /CNT=3 /FEA=EST /TIER=ConsEnd /STK=1 /UG=Xl.6053 /UG_TITLE=ESTs, Moderately similar to ACBP_HUMAN Acyl-CoA-binding protein (ACBP) (Diazepam binding inhibitor) (DBI) (Endozepine) (EP) (H.sapiens)
Xl.17415.1.S1_at	6.81097	6.85144	6.85144	10.3418	7.0824	11.9029	10.7911	6.83795	10.0295	-3.19158	-3.3282	0.00962252	0.0191367	-3.31134	gb:BG348948 /DB_XREF=gi:13169374 /DB_XREF=daa35b02.x1 /CLONE=IMAGE:4058066 /TID=Xl.17415.1 /CNT=33 /FEA=mRNA /TIER=Stack /STK=15 /UG=Xl.17415 /UG_TITLE=X.laevis alpha-globin mRNA, 3 end
Xl.19539.1.A1_at	4.11235	4.16757	4.16757	7.76454	6.82154	7.1601	7.61171	4.14916	7.33947	-3.19031	-12.04	1.29559e-06	3.57687e-05	6.07378	gb:BQ386923 /DB_XREF=gi:21074610 /DB_XREF=NISC_mn20h10.y1 /CLONE=IMAGE:5074051 /TID=Xl.19539.1 /CNT=4 /FEA=EST /TIER=ConsEnd /STK=0 /UG=Xl.19539 /UG_TITLE=ESTs, Highly similar to HSPC139 protein (Homo sapiens) (H.sapiens)
Xl.11127.1.A1_at	3.78242	5.00048	5.00048	7.44549	8.28808	7.67829	7.71272	4.59446	7.78115	-3.18669	-8.95838	1.33714e-05	0.000157509	3.65448	gb:CB561578 /DB_XREF=gi:29481108 /DB_XREF=AGENCOURT_13329791 /CLONE=IMAGE:6879951 /TID=Xl.11127.1 /CNT=14 /FEA=EST /TIER=Stack /STK=13 /UG=Xl.11127 /UG_TITLE=ESTs
Xl.16729.1.S1_at	6.28498	5.45685	5.45685	8.77584	8.32729	9.27802	9.28404	5.7329	8.9163	-3.1834	-9.73433	7.00612e-06	0.000103258	4.33172	gb:BQ384372 /DB_XREF=gi:21072059 /DB_XREF=NISC_mn06c12.x1 /CLONE=IMAGE:5049215 /TID=Xl.16729.1 /CNT=20 /FEA=EST /TIER=ConsEnd /STK=1 /UG=Xl.16729 /UG_TITLE=ESTs, Moderately similar to B55558 thyrotroph embryonic factor - human (H.sapiens)
Xl.7236.1.S1_at	5.88718	5.86852	5.86852	9.17113	9.20709	8.93845	8.91033	5.87474	9.05675	-3.18201	-16.6093	9.43273e-08	8.9533e-06	8.66276	gb:BC043896.1 /DB_XREF=gi:27881789 /TID=Xl.7236.1 /CNT=42 /FEA=FLmRNA /TIER=FL+Stack /STK=19 /UG=Xl.7236 /DEF=Xenopus laevis, Similar to adenylosuccinate synthetase 2, non muscle, clone MGC:53837 IMAGE:5542529, mRNA, complete cds. /PROD=Similar to adenylosuccinate synthetase 2, nonmuscle /FL=gb:BC043896.1
Xl.10468.1.S1_at	3.71755	5.29568	5.29568	8.44155	7.8109	7.34005	8.19233	4.76964	7.94621	-3.17657	-7.21233	6.89607e-05	0.000455704	1.9193	gb:BG579447 /DB_XREF=gi:13594511 /DB_XREF=dab75a12.x1 /CLONE=IMAGE:4202783 /TID=Xl.10468.1 /CNT=9 /FEA=EST /TIER=ConsEnd /STK=2 /UG=Xl.10468 /UG_TITLE=ESTs, Moderately similar to prefoldin 1; prefoldin subunit 1 (Homo sapiens) (H.sapiens)
Xl.8471.1.S1_at	9.36988	8.46872	8.46872	11.7779	11.6536	12.1133	12.2369	8.7691	11.9454	-3.17635	-10.9122	2.84412e-06	5.88553e-05	5.26768	gb:D38406.1 /DB_XREF=gi:551634 /TID=Xl.8471.1 /CNT=108 /FEA=FLmRNA /TIER=FL+Stack /STK=18 /UG=Xl.8471 /DEF=Xenopus laevis mRNA for cofilin, complete cds. /PROD=cofilin /FL=gb:BC043803.1 gb:D38406.1 gb:U26269.1
Xl.14576.1.A1_at	6.27952	5.82774	5.82774	8.99328	9.17623	9.18946	9.25653	5.97833	9.15387	-3.17554	-15.1745	1.98047e-07	1.16766e-05	7.94794	gb:BJ092291 /DB_XREF=gi:17591320 /DB_XREF=BJ092291 /CLONE=XL064m03 /TID=Xl.14576.1 /CNT=3 /FEA=EST /TIER=ConsEnd /STK=1 /UG=Xl.14576 /UG_TITLE=ESTs, Moderately similar to general transcription factor IIIC, polypeptide 4 (90kD) (Homo sapiens) (H.sapiens)
Xl.4613.1.A1_at	6.2736	5.69905	5.69905	9.34384	8.62249	9.10215	9.18142	5.89057	9.06247	-3.17191	-12.2676	1.11439e-06	3.29878e-05	6.22697	gb:BF025511 /DB_XREF=gi:10755930 /DB_XREF=dg05a02.x1 /CLONE=IMAGE:3747914 /TID=Xl.4613.1 /CNT=7 /FEA=EST /TIER=ConsEnd /STK=4 /UG=Xl.4613 /UG_TITLE=ESTs, Moderately similar to SNX5_HUMAN Sorting nexin 5 (H.sapiens)
Xl.8356.1.A1_at	5.92098	5.76249	5.76249	8.927	8.52225	8.84175	9.65681	5.81532	8.98695	-3.17163	-11.1802	2.34443e-06	5.14834e-05	5.46672	gb:BJ088063 /DB_XREF=gi:17585177 /DB_XREF=BJ088063 /CLONE=XL091l11 /TID=Xl.8356.1 /CNT=13 /FEA=EST /TIER=Stack /STK=11 /UG=Xl.8356 /UG_TITLE=ESTs, Moderately similar to uncharacterized hematopoietic stemprogenitor cells protein MDS029 (Homo sapiens) (H.sapiens)
Xl.8956.1.A1_at	3.28245	2.6472	2.6472	6.8637	6.27952	4.87121	6.10356	2.85895	6.0295	-3.17054	-7.16997	7.20252e-05	0.000468102	1.87308	gb:BU907412 /DB_XREF=gi:24089326 /DB_XREF=AGENCOURT_10482456 /CLONE=IMAGE:6632577 /TID=Xl.8956.1 /CNT=7 /FEA=EST /TIER=ConsEnd /STK=0 /UG=Xl.8956 /UG_TITLE=ESTs, Weakly similar to cisplatin resistance-associated overexpressed protein (Homo sapiens) (H.sapiens)
Xl.22600.1.A1_at	3.51932	4.04159	4.04159	6.48121	6.77177	7.84634	7.05197	3.8675	7.03782	-3.17032	-9.32181	9.82336e-06	0.00012806	3.97815	gb:AW766590 /DB_XREF=gi:7698581 /DB_XREF=da64b05.x1 /CLONE=IMAGE:3199665 /TID=Xl.22600.1 /CNT=3 /FEA=EST /TIER=ConsEnd /STK=2 /UG=Xl.22600 /UG_TITLE=ESTs
Xl.16339.1.A1_at	2.59167	3.92206	3.92206	6.87164	5.91891	6.97316	6.8279	3.4786	6.6479	-3.16931	-7.85514	3.64694e-05	0.000305285	2.59537	gb:BJ087808 /DB_XREF=gi:17584816 /DB_XREF=BJ087808 /CLONE=XL082m18 /TID=Xl.16339.1 /CNT=3 /FEA=EST /TIER=ConsEnd /STK=1 /UG=Xl.16339 /UG_TITLE=ESTs, Weakly similar to RIL_HUMAN LIM protein RIL (Reversion-induced LIM protein) (H.sapiens)
Xl.19696.1.S1_at	4.31159	3.15648	3.15648	7.16298	5.98018	6.51017	7.16341	3.54151	6.70418	-3.16267	-7.88377	3.54827e-05	0.000299647	2.62442	gb:BQ398347 /DB_XREF=gi:21086034 /DB_XREF=NISC_mo06g01.x1 /CLONE=IMAGE:5162665 /TID=Xl.19696.1 /CNT=3 /FEA=EST /TIER=ConsEnd /STK=1 /UG=Xl.19696 /UG_TITLE=ESTs, Weakly similar to putative intramembrane cleaving protease (Homo sapiens) (H.sapiens)
Xl.23530.1.S1_at	4.10223	4.20564	4.20564	7.37028	7.19145	7.2413	7.50565	4.17117	7.32717	-3.15599	-16.547	9.7291e-08	9.07353e-06	8.63328	gb:BC044077.1 /DB_XREF=gi:28279846 /TID=Xl.23530.1 /CNT=4 /FEA=FLmRNA /TIER=FL /STK=1 /UG=Xl.23530 /DEF=Xenopus laevis, Similar to RIKEN cDNA 5830498C14 gene, clone MGC:52668 IMAGE:4682427, mRNA, complete cds. /PROD=Similar to RIKEN cDNA 5830498C14 gene /FL=gb:BC044077.1
Xl.21443.1.S1_at	4.31159	4.24853	4.24853	7.66265	7.38944	7.36614	7.2726	4.26955	7.42271	-3.15316	-16.2211	1.14586e-07	9.60601e-06	8.47687	gb:BC046663.1 /DB_XREF=gi:28302286 /TID=Xl.21443.1 /CNT=1 /FEA=FLmRNA /TIER=FL /STK=1 /UG=Xl.21443 /DEF=Xenopus laevis, Similar to GA binding protein transcription factor, beta subunit 1, 53kDa, clone MGC:52949 IMAGE:4930338, mRNA, complete cds. /PROD=Similar to GA binding protein transcriptionfactor, beta subunit 1, 53kDa /FL=gb:BC046663.1
Xl.14584.1.A1_at	8.16415	7.94331	7.94331	11.3266	10.6044	11	11.747	8.01693	11.1695	-3.1526	-10.9608	2.74544e-06	5.76196e-05	5.3041	gb:BJ091208 /DB_XREF=gi:17589755 /DB_XREF=BJ091208 /CLONE=XL094h07 /TID=Xl.14584.1 /CNT=4 /FEA=EST /TIER=ConsEnd /STK=1 /UG=Xl.14584 /UG_TITLE=ESTs
Xl.2232.1.A1_at	5.02536	5.67469	5.67469	8.36089	8.40412	8.85574	8.81191	5.45825	8.60816	-3.14992	-12.3224	1.07511e-06	3.26673e-05	6.26338	gb:BE575477 /DB_XREF=gi:9825276 /DB_XREF=dc56c01.x1 /CLONE=IMAGE:3401088 /TID=Xl.2232.1 /CNT=8 /FEA=EST /TIER=ConsEnd /STK=0 /UG=Xl.2232 /UG_TITLE=ESTs, Weakly similar to autocrine motility factor receptor (Mus musculus) (M.musculus)
Xl.12418.1.A1_at	3.92754	3.85964	3.85964	6.72923	6.89051	7.45586	7.04889	3.88228	7.03112	-3.14885	-13.7946	4.31194e-07	1.78433e-05	7.18161	gb:BG162038 /DB_XREF=gi:12695957 /DB_XREF=dc44h03.y1 /CLONE=IMAGE:3400157 /TID=Xl.12418.1 /CNT=6 /FEA=EST /TIER=ConsEnd /STK=1 /UG=Xl.12418 /UG_TITLE=ESTs, Highly similar to SN22_HUMAN Possible global transcription activator SNF2L2 (SNF2-alpha) (H.sapiens)
Xl.4774.1.A1_at	4.78156	5.10604	5.10604	7.02423	9.76192	8.8775	6.88389	4.99788	8.13689	-3.13901	-4.67826	0.0013649	0.00383555	-1.25886	gb:BI445696 /DB_XREF=gi:15270403 /DB_XREF=dae57d07.x3 /CLONE=IMAGE:4678308 /TID=Xl.4774.1 /CNT=6 /FEA=EST /TIER=ConsEnd /STK=3 /UG=Xl.4774 /UG_TITLE=ESTs, Moderately similar to Nit protein 2 (Homo sapiens) (H.sapiens)
Xl.15517.1.A1_at	6.43118	5.1033	5.1033	9.18484	8.60411	8.06388	8.87907	5.54592	8.68298	-3.13705	-7.84922	3.66772e-05	0.000306355	2.58935	gb:BJ054522 /DB_XREF=gi:17422846 /DB_XREF=BJ054522 /CLONE=XL044i17 /TID=Xl.15517.1 /CNT=3 /FEA=EST /TIER=ConsEnd /STK=1 /UG=Xl.15517 /UG_TITLE=ESTs, Moderately similar to RaP2 interacting protein 8 (Homo sapiens) (H.sapiens)
Xl.4992.1.S1_at	5.40309	4.90241	4.90241	8.09762	8.00735	8.20963	8.5059	5.0693	8.20512	-3.13582	-13.6158	4.79446e-07	1.9021e-05	7.07596	gb:BC045075.1 /DB_XREF=gi:27924360 /TID=Xl.4992.1 /CNT=22 /FEA=FLmRNA /TIER=FL+Stack /STK=6 /UG=Xl.4992 /DEF=Xenopus laevis, Similar to Fms interacting protein, clone MGC:53814 IMAGE:5542147, mRNA, complete cds. /PROD=Similar to Fms interacting protein /FL=gb:BC045075.1
Xl.1010.1.S1_at	6.26665	5.70741	5.70741	9.30393	9.27712	8.50033	9.03438	5.89382	9.02894	-3.13512	-11.4558	1.93018e-06	4.64741e-05	5.66641	gb:AB046536.2 /DB_XREF=gi:16326340 /GEN=Xmtch2 /TID=Xl.1010.1 /CNT=21 /FEA=FLmRNA /TIER=FL /STK=1 /UG=Xl.1010 /DEF=Xenopus laevis Xmtch2 mRNA for mitochondrial carrier homolog 2, complete cds. /PROD=mitochondrial carrier homolog 2 /FL=gb:AB046536.2
Xl.19834.1.A1_at	4.97283	4.34811	4.34811	6.98978	8.06518	6.30193	9.38842	4.55635	7.68633	-3.12997	-4.80089	0.00115795	0.0033643	-1.08432	gb:BQ399706 /DB_XREF=gi:21087393 /DB_XREF=NISC_mp05a12.x1 /CLONE=IMAGE:4968478 /TID=Xl.19834.1 /CNT=2 /FEA=EST /TIER=ConsEnd /STK=0 /UG=Xl.19834 /UG_TITLE=ESTs, Weakly similar to GTPase regulator associated with the focal adhesion kinase pp125 (Homo sapiens) (H.sapiens)
Xl.16723.1.S1_at	8.79458	8.70758	8.70758	12.1852	11.8037	11.7272	11.7496	8.73658	11.8664	-3.12982	-15.3288	1.82299e-07	1.11931e-05	8.02859	gb:CB591214 /DB_XREF=gi:29509070 /DB_XREF=AGENCOURT_12925457 /CLONE=IMAGE:6898970 /TID=Xl.16723.1 /CNT=10 /FEA=EST /TIER=ConsEnd /STK=5 /UG=Xl.16723 /UG_TITLE=ESTs, Moderately similar to 2113200B ribosomal protein L21 (Homo sapiens) (H.sapiens)
Xl.23740.1.S1_at	6.53426	5.9931	5.9931	8.96231	9.11433	9.3939	9.73008	6.17349	9.30016	-3.12667	-11.9158	1.40807e-06	3.76086e-05	5.98894	gb:BG020221 /DB_XREF=gi:12476300 /DB_XREF=dc72a07.x1 /CLONE=IMAGE:3402517 /TID=Xl.23740.1 /CNT=57 /FEA=EST /TIER=Stack /STK=9 /UG=Xl.23740 /UG_TITLE=ESTs, Weakly similar to prosaposin (variant Gaucher disease and variant metachromatic leukodystrophy); Prosaposin (sphingolipid activator protein-1) (Homo sapiens) (H.sapiens)
Xl.13570.1.S1_at	2.37944	2.95372	2.95372	6.48581	5.78474	4.91796	6.36134	2.7623	5.88746	-3.12517	-7.99827	3.18219e-05	0.000277085	2.73972	gb:BJ052780 /DB_XREF=gi:17500270 /DB_XREF=BJ052780 /CLONE=XL042k20 /TID=Xl.13570.1 /CNT=7 /FEA=EST /TIER=ConsEnd /STK=1 /UG=Xl.13570 /UG_TITLE=ESTs, Moderately similar to serine palmitoyltransferase, long chain base subunit 2; serine palmitoyltransferase, subunit II (Homo sapiens) (H.sapiens)
Xl.14050.1.A1_at	2.77435	5.38469	5.38469	7.32238	7.3855	7.63108	8.21817	4.51457	7.63928	-3.12471	-5.07206	0.000811232	0.00254772	-0.706085	gb:BG513514 /DB_XREF=gi:13484171 /DB_XREF=dae11h12.x1 /CLONE=IMAGE:4633990 /TID=Xl.14050.1 /CNT=6 /FEA=EST /TIER=ConsEnd /STK=1 /UG=Xl.14050 /UG_TITLE=ESTs, Moderately similar to CPG2_HUMAN Coatomer gamma-2 subunit (Gamma-2 coat protein) (Gamma-2 COP) (H.sapiens)
Xl.6835.1.S1_at	4.847	4.04089	4.04089	7.97624	7.89375	6.70536	7.16128	4.30959	7.43416	-3.12456	-8.40332	2.18592e-05	0.000218635	3.13669	gb:BC045259.1 /DB_XREF=gi:28277240 /TID=Xl.6835.1 /CNT=40 /FEA=FLmRNA /TIER=FL+Stack /STK=6 /UG=Xl.6835 /DEF=Xenopus laevis, Similar to heat shock protein, 74 kDa, A, clone MGC:52616 IMAGE:4681245, mRNA, complete cds. /PROD=Similar to heat shock protein, 74 kDa, A /FL=gb:BC045259.1
Xl.26190.1.A1_at	5.52299	6.61287	6.61287	9.06499	9.5674	9.47809	9.38122	6.24958	9.37293	-3.12335	-10.0644	5.39248e-06	8.80308e-05	4.60463	gb:CD362654 /DB_XREF=gi:31134065 /DB_XREF=AGENCOURT_14238994 /CLONE=IMAGE:6956920 /TID=Xl.26190.1 /CNT=2 /FEA=EST /TIER=ConsEnd /STK=1 /UG=Xl.26190 /UG_TITLE=ESTs
Xl.3709.1.A1_x_at	4.0969	3.4815	3.4815	6.88407	6.6039	7.28075	6.45844	3.68663	6.80679	-3.12016	-11.2954	2.16042e-06	4.86517e-05	5.55075	gb:BF428137 /DB_XREF=gi:11439829 /DB_XREF=daa03c07.x1 /CLONE=IMAGE:4055052 /TID=Xl.3709.1 /CNT=3 /FEA=EST /TIER=ConsEnd /STK=1 /UG=Xl.3709 /UG_TITLE=ESTs, Weakly similar to protein phosphatase 1, regulatory subunit 15A; growth arrest and DNA-damage-inducible 34 (Homo sapiens) (H.sapiens)
Xl.6790.2.A1_x_at	3.24386	2.61298	2.61298	6.1251	6.22752	5.62351	5.78801	2.82327	5.94104	-3.11777	-12.077	1.26396e-06	3.53201e-05	6.09894	gb:BJ056419 /DB_XREF=gi:17469397 /DB_XREF=BJ056419 /CLONE=XL035m14 /TID=Xl.6790.2 /CNT=7 /FEA=EST /TIER=Stack /STK=6 /UG=Xl.6790 /UG_TITLE=Xenopus laevis, clone IMAGE:4889053, mRNA, partial cds
Xl.19447.1.S1_at	3.53292	3.50693	3.50693	6.95232	6.87627	6.90882	5.78784	3.51559	6.63131	-3.11572	-9.9818	5.75363e-06	9.16511e-05	4.53712	gb:BE506103 /DB_XREF=gi:9725921 /DB_XREF=db61b08.y1 /CLONE=IMAGE:3377463 /TID=Xl.19447.1 /CNT=8 /FEA=EST /TIER=ConsEnd /STK=0 /UG=Xl.19447 /UG_TITLE=ESTs, Moderately similar to hypothetical protein LOC51248 (Homo sapiens) (H.sapiens)
Xl.13409.1.S1_at	3.78242	3.51528	3.51528	6.89293	6.90811	7.08847	5.98898	3.60433	6.71962	-3.1153	-10.6365	3.48463e-06	6.6419e-05	5.05781	gb:BC044111.1 /DB_XREF=gi:28278114 /TID=Xl.13409.1 /CNT=4 /FEA=FLmRNA /TIER=FL /STK=1 /UG=Xl.13409 /DEF=Xenopus laevis, Similar to RIKEN cDNA A930011N14 gene, clone MGC:52842 IMAGE:4885267, mRNA, complete cds. /PROD=Similar to RIKEN cDNA A930011N14 gene /FL=gb:BC044111.1
Xl.9622.1.A1_at	6.26236	6.57351	6.57351	9.6831	9.63353	9.54809	9.4671	6.46979	9.58296	-3.11317	-15.9469	1.31809e-07	1.00254e-05	8.34236	gb:BG159891 /DB_XREF=gi:12693810 /DB_XREF=dab69d10.x1 /CLONE=IMAGE:4202179 /TID=Xl.9622.1 /CNT=2 /FEA=EST /TIER=ConsEnd /STK=1 /UG=Xl.9622 /UG_TITLE=ESTs, Weakly similar to Y166_HUMAN Hypothetical protein KIAA0166 (H.sapiens)
Xl.24025.1.S1_at	8.55686	7.88975	7.88975	11.6593	11.7046	10.9975	10.536	8.11212	11.2244	-3.11224	-9.0823	1.2023e-05	0.000146693	3.76617	gb:CB200622 /DB_XREF=gi:29147167 /DB_XREF=AGENCOURT_11271968 /CLONE=IMAGE:6875737 /TID=Xl.24025.1 /CNT=3 /FEA=EST /TIER=ConsEnd /STK=1 /UG=Xl.24025 /UG_TITLE=ESTs, Weakly similar to hypothetical protein MGC14697 (Homo sapiens) (H.sapiens)
Xl.169.1.S1_at	3.78179	2.79743	2.79743	7.71076	8.09631	2.72295	6.41909	3.12555	6.23728	-3.11173	-2.71005	0.0253468	0.0430251	-4.30363	gb:D44549.1 /DB_XREF=gi:971308 /TID=Xl.169.1 /CNT=9 /FEA=FLmRNA /TIER=FL /STK=3 /UG=Xl.169 /DEF=Xenopus laevis mRNA for low molecular mass protein-7 (LMP-7) homolog, complete cds. /PROD=low molecular mass protein-7 (LMP-7) homolog /FL=gb:D44549.1
Xl.22941.1.A1_at	2.71064	2.51649	2.51649	6.1294	5.25988	4.68994	6.68626	2.58121	5.69137	-3.11017	-7.00718	8.52765e-05	0.000519571	1.69349	gb:BJ048949 /DB_XREF=gi:17410100 /DB_XREF=BJ048949 /CLONE=XL022i21 /TID=Xl.22941.1 /CNT=5 /FEA=EST /TIER=ConsEnd /STK=4 /UG=Xl.22941 /UG_TITLE=ESTs, Moderately similar to A57088 nucleoporin-like protein Rab - human (H.sapiens)
Xl.4969.2.S1_at	6.79205	6.14064	6.14064	9.48878	9.88824	8.67861	9.8147	6.35777	9.46758	-3.10981	-9.1798	1.10678e-05	0.00013877	3.85307	gb:BG556044 /DB_XREF=gi:13567824 /DB_XREF=df25h01.x1 /CLONE=IMAGE:3558385 /TID=Xl.4969.2 /CNT=22 /FEA=EST /TIER=Stack /STK=6 /UG=Xl.4969 /UG_TITLE=Xenopus laevis, Similar to stromal cell derived factor receptor 1, clone IMAGE:5543080, mRNA, partial cds
Xl.24014.1.A1_at	4.55905	2.8695	2.8695	6.81751	6.38579	6.6158	6.34786	3.43269	6.54174	-3.10905	-7.47674	5.27954e-05	0.000386706	2.20303	gb:BI314277 /DB_XREF=gi:14988604 /DB_XREF=dai33h11.x1 /CLONE=IMAGE:4963820 /TID=Xl.24014.1 /CNT=8 /FEA=EST /TIER=ConsEnd /STK=1 /UG=Xl.24014 /UG_TITLE=ESTs, Moderately similar to D123 gene product (Homo sapiens) (H.sapiens)
Xl.6186.1.A1_x_at	4.30088	5.16612	5.16612	7.9352	7.66661	7.76581	8.57238	4.87771	7.985	-3.10729	-9.80313	6.62998e-06	0.000100059	4.38932	gb:AB018189.1 /DB_XREF=gi:3721939 /GEN=NO27 /TID=Xl.6186.1 /CNT=16 /FEA=FLmRNA /TIER=FL /STK=2 /UG=Xl.6186 /UG_TITLE=Xenopus laevis NO27 mRNA, complete cds /DEF=Xenopus laevis NO27 mRNA, complete cds. /FL=gb:AB018189.1
Xl.15715.1.S1_at	2.5212	3.32136	3.32136	6.631	4.97397	7.10578	5.93229	3.05464	6.16076	-3.10612	-6.35642	0.000172591	0.000835389	0.942764	gb:CA793161 /DB_XREF=gi:26041735 /DB_XREF=AGENCOURT_10301165 /CLONE=IMAGE:5156513 /TID=Xl.15715.1 /CNT=26 /FEA=EST /TIER=ConsEnd /STK=0 /UG=Xl.15715 /UG_TITLE=ESTs, Moderately similar to hypothetical protein LOC51060 (Homo sapiens) (H.sapiens)
Xl.25426.1.S1_s_at	3.64924	3.04329	3.04329	7.16575	6.33923	5.58869	6.31002	3.24527	6.35092	-3.10565	-8.46368	2.06953e-05	0.000211653	3.19444	gb:AW460633 /DB_XREF=gi:7030850 /DB_XREF=da29d06.x1 /CLONE=IMAGE:2942507 /TID=Xl.25426.1 /CNT=2 /FEA=EST /TIER=ConsEnd /STK=1 /UG=Xl.25426 /UG_TITLE=ESTs
Xl.2586.1.S1_at	5.47676	7.42632	7.42632	10.6299	9.83581	9.67249	9.38862	6.77646	9.88171	-3.10525	-6.03144	0.000250139	0.00108123	0.547247	gb:BG730796 /DB_XREF=gi:14015871 /DB_XREF=dac23a07.x1 /CLONE=IMAGE:4407828 /TID=Xl.2586.1 /CNT=7 /FEA=EST /TIER=ConsEnd /STK=1 /UG=Xl.2586 /UG_TITLE=ESTs, Weakly similar to hypothetical protein MGC4825 (Homo sapiens) (H.sapiens)
Xl.6966.1.S1_at	3.60672	3.51528	3.51528	6.39687	6.68447	6.85482	6.65929	3.54576	6.64887	-3.10311	-15.6004	1.57856e-07	1.07915e-05	8.16827	gb:BE188933 /DB_XREF=gi:9730568 /DB_XREF=db61d12.x1 /CLONE=IMAGE:3377495 /TID=Xl.6966.1 /CNT=9 /FEA=EST /TIER=ConsEnd /STK=2 /UG=Xl.6966 /UG_TITLE=ESTs
Xl.21419.1.S1_at	5.04772	4.38326	4.38326	7.84159	7.32361	8.17048	7.49128	4.60475	7.70674	-3.10199	-10.8664	2.94072e-06	6.02286e-05	5.23321	gb:BJ056752 /DB_XREF=gi:17479301 /DB_XREF=BJ056752 /CLONE=XL032o15 /TID=Xl.21419.1 /CNT=41 /FEA=mRNA /TIER=Stack /STK=10 /UG=Xl.21419 /UG_TITLE=Xenopus laevis, Similar to serinearginine repetitive matrix 1, clone IMAGE:4930761, mRNA
Xl.17384.1.S1_at	3.15648	3.98751	3.98751	6.56627	6.05748	7.81694	6.79306	3.7105	6.80844	-3.09794	-7.37133	5.86764e-05	0.000414707	2.09089	gb:AY062922.1 /DB_XREF=gi:18482451 /GEN=PIK3R1 /TID=Xl.17384.1 /CNT=4 /FEA=FLmRNA /TIER=FL /STK=1 /UG=Xl.17384 /DEF=Xenopus laevis phosphoinositide-3-kinase (PIK3R1) mRNA, complete cds. /PROD=phosphoinositide-3-kinase /FL=gb:AY062922.1
Xl.2597.1.S1_at	2.95372	4.37895	4.37895	7.6744	7.03212	6.8637	6.43464	3.90388	7.00121	-3.09734	-7.30189	6.29442e-05	0.000430878	2.0163	gb:BG021101 /DB_XREF=gi:12477264 /DB_XREF=df31a03.x1 /CLONE=IMAGE:3579917 /TID=Xl.2597.1 /CNT=2 /FEA=EST /TIER=ConsEnd /STK=1 /UG=Xl.2597 /UG_TITLE=ESTs
Xl.8235.1.A1_a_at	5.38846	6.76561	6.76561	10.0306	9.55141	8.67473	9.34663	6.30656	9.40083	-3.09427	-7.20476	6.9498e-05	0.000457534	1.91104	gb:BJ052114 /DB_XREF=gi:17496184 /DB_XREF=BJ052114 /CLONE=XL040h13 /TID=Xl.8235.1 /CNT=6 /FEA=EST /TIER=ConsEnd /STK=5 /UG=Xl.8235 /UG_TITLE=ESTs, Weakly similar to eukaryotic translation elongation factor 1 beta 2; eukaryotic translation elongation factor 1 beta 1 (Homo sapiens) (H.sapiens)
Xl.13981.2.A1_at	4.07496	4.55684	4.55684	7.62163	7.25961	7.7727	7.30391	4.39621	7.48946	-3.09325	-13.1642	6.30356e-07	2.23445e-05	6.80219	gb:BJ078100 /DB_XREF=gi:17523016 /DB_XREF=BJ078100 /CLONE=XL063b06 /TID=Xl.13981.2 /CNT=2 /FEA=EST /TIER=ConsEnd /STK=2 /UG=Xl.13981 /UG_TITLE=ESTs, Weakly similar to I38500 interferon gamma receptor accessory factor-1 precursor - human (H.sapiens)
Xl.14119.1.S1_at	3.40603	2.95372	2.95372	7.7445	7.76738	2.63544	6.64198	3.10449	6.19732	-3.09284	-2.75004	0.0237861	0.040792	-4.23935	gb:BC049289.1 /DB_XREF=gi:29351638 /TID=Xl.14119.1 /CNT=15 /FEA=mRNA /TIER=ConsEnd /STK=0 /UG=Xl.14119 /UG_TITLE=Xenopus laevis, Similar to spectrin repeat containing, nuclear envelope 1, clone IMAGE:5542219, mRNA, partial cds /DEF=Xenopus laevis, Similar to spectrin repeat containing, nuclear envelope 1, clone IMAGE:5542219, mRNA, partial cds.
Xl.4276.1.S1_at	5.6331	5.96709	5.96709	8.53941	8.78223	8.7552	9.71612	5.85576	8.94824	-3.09248	-10.1096	5.20567e-06	8.69228e-05	4.64131	gb:X53745.1 /DB_XREF=gi:64644 /TID=Xl.4276.1 /CNT=136 /FEA=mRNA /TIER=Stack /STK=25 /UG=Xl.4276 /UG_TITLE=Xenopus mRNA for cyclin A1 /DEF=Xenopus mRNA for cyclin A1.
Xl.13853.1.A1_at	3.00837	3.04127	3.04127	4.8253	6.95484	6.50542	6.17884	3.0303	6.1161	-3.0858	-6.79925	0.000106257	0.000599754	1.45941	gb:BJ076782 /DB_XREF=gi:17521698 /DB_XREF=BJ076782 /CLONE=XL058l22 /TID=Xl.13853.1 /CNT=5 /FEA=EST /TIER=ConsEnd /STK=4 /UG=Xl.13853 /UG_TITLE=ESTs
Xl.17758.1.S1_at	5.54038	3.22162	3.22162	7.62712	7.08406	7.33163	6.25924	3.99454	7.07551	-3.08098	-5.20454	0.000684393	0.00224643	-0.52517	gb:CB944321 /DB_XREF=gi:30192440 /DB_XREF=AGENCOURT_13844712 /CLONE=IMAGE:6932485 /TID=Xl.17758.1 /CNT=5 /FEA=EST /TIER=ConsEnd /STK=1 /UG=Xl.17758 /UG_TITLE=ESTs, Weakly similar to ARO8_YEAST AROMATIC AMINO ACID AMINOTRANSFERASE I (S. cerevisiae)
Xl.12592.1.A1_at	4.25602	4.55684	4.55684	7.57781	7.739	7.41124	7.38907	4.45657	7.52928	-3.07271	-15.0915	2.07135e-07	1.19175e-05	7.90418	gb:AW198684 /DB_XREF=gi:6479304 /DB_XREF=da05b05.x1 /CLONE=XENOPUS_SOURCE_ID:xlnoc002a10 /TID=Xl.12592.1 /CNT=2 /FEA=EST /TIER=ConsEnd /STK=1 /UG=Xl.12592 /UG_TITLE=ESTs
Xl.3668.1.S1_at	4.18219	5.20511	5.20511	8.23002	7.82004	8.30668	7.38907	4.86414	7.93645	-3.07232	-8.9865	1.30513e-05	0.00015478	3.67995	gb:AF450296.1 /DB_XREF=gi:25991259 /GEN=PXP17 /TID=Xl.3668.1 /CNT=38 /FEA=FLmRNA /TIER=FL+Stack /STK=8 /UG=Xl.3668 /DEF=Xenopus laevis F-box protein (PXP17) mRNA, complete cds. /PROD=F-box protein /FL=gb:AF450296.1
Xl.8360.1.A1_at	4.65309	4.50043	4.50043	7.41339	7.43361	7.56383	8.07537	4.55132	7.62155	-3.07023	-13.3728	5.5491e-07	2.0519e-05	6.92993	gb:BF024719 /DB_XREF=gi:10755138 /DB_XREF=dc86a01.x1 /CLONE=IMAGE:3403944 /TID=Xl.8360.1 /CNT=7 /FEA=EST /TIER=ConsEnd /STK=4 /UG=Xl.8360 /UG_TITLE=ESTs
Xl.6060.2.A1_x_at	6.90718	6.75266	6.75266	10.2325	10.2627	9.23537	9.76693	6.80417	9.87437	-3.0702	-10.7824	3.12784e-06	6.19365e-05	5.1695	gb:BJ054788 /DB_XREF=gi:17423112 /DB_XREF=BJ054788 /CLONE=XL046g08 /TID=Xl.6060.2 /CNT=7 /FEA=EST /TIER=Stack /STK=6 /UG=Xl.6060 /UG_TITLE=Xenopus laevis, Similar to dendritic cell protein, clone MGC:52639 IMAGE:4681394, mRNA, complete cds
Xl.235.1.S1_at	6.10703	6.61537	6.61537	9.28357	9.2516	9.96446	9.55434	6.44592	9.51349	-3.06757	-11.9244	1.39998e-06	3.74796e-05	5.99481	gb:BJ043759 /DB_XREF=gi:17419612 /DB_XREF=BJ043759 /CLONE=XL011b05 /TID=Xl.235.1 /CNT=41 /FEA=mRNA /TIER=Stack /STK=9 /UG=Xl.235 /UG_TITLE=X.laevis mRNA for glycoprotein
Xl.6724.1.S1_x_at	2.25577	2.17241	2.17241	5.73691	4.09853	6.44753	4.78489	2.2002	5.26697	-3.06677	-6.08954	0.000233854	0.0010338	0.619005	gb:AB022691.1 /DB_XREF=gi:6006267 /TID=Xl.6724.1 /CNT=39 /FEA=FLmRNA /TIER=FL /STK=2 /UG=Xl.6724 /DEF=Xenopus laevis mRNA for TAF-Ibeta1, complete cds. /PROD=TAF-Ibeta1 /FL=gb:AB022691.1
Xl.8913.1.S1_at	5.40309	2.7814	2.7814	7.30854	6.41071	6.44857	6.71528	3.6553	6.72078	-3.06548	-4.9511	0.000949541	0.00287895	-0.873488	gb:BG233664 /DB_XREF=gi:12747511 /DB_XREF=daa26d05.x1 /CLONE=IMAGE:4057377 /TID=Xl.8913.1 /CNT=5 /FEA=EST /TIER=ConsEnd /STK=3 /UG=Xl.8913 /UG_TITLE=ESTs, Weakly similar to CYTC_HUMAN Cystatin C precursor (Neuroendocrine basic polypeptide) (Gamma-trace) (Post-gamma-globulin) (H.sapiens)
Xl.10805.1.A1_at	2.84719	2.48844	2.48844	5.75557	5.82258	4.983	6.11511	2.60803	5.66906	-3.06104	-10.4368	4.049e-06	7.35073e-05	4.90232	gb:BE508680 /DB_XREF=gi:9728508 /DB_XREF=da50h01.x1 /CLONE=IMAGE:3198385 /TID=Xl.10805.1 /CNT=1 /FEA=EST /TIER=ConsEnd /STK=1 /UG=Xl.10805 /UG_TITLE=EST
Xl.18973.1.A1_at	3.78242	2.67676	2.67676	7.25009	6.20384	5.59846	5.35962	3.04532	6.103	-3.05768	-6.30623	0.000182615	0.000871346	0.882602	gb:BG414021 /DB_XREF=gi:13319574 /DB_XREF=dd23b05.x1 /CLONE=IMAGE:3421017 /TID=Xl.18973.1 /CNT=2 /FEA=EST /TIER=ConsEnd /STK=2 /UG=Xl.18973 /UG_TITLE=ESTs, Weakly similar to F-box only protein 6; F-box protein Fbx6; F-box protein FBG2 (Homo sapiens) (H.sapiens)
Xl.25362.1.A1_at	5.48315	5.26736	5.26736	9.24295	9.32513	7.17615	7.83799	5.33929	8.39556	-3.05627	-5.91452	0.000286805	0.00119217	0.401437	gb:BE026639 /DB_XREF=gi:8320000 /DB_XREF=db29d04.x1 /CLONE=XENOPUS_SOURCE_ID: /TID=Xl.25362.1 /CNT=7 /FEA=EST /TIER=ConsEnd /STK=1 /UG=Xl.25362 /UG_TITLE=ESTs, Weakly similar to tumor suppressing subtransferable candidate 4; tumor-suppressing STF cDNA 4; TSSC4 tumor-suppressing STF cDNA 4 (Homo sapiens) (H.sapiens)
Xl.7509.2.A1_at	6.6114	5.59746	5.59746	8.87865	8.49773	8.93132	9.65899	5.93544	8.99167	-3.05623	-8.55194	1.9115e-05	0.000199578	3.27823	gb:CB563615 /DB_XREF=gi:29483145 /DB_XREF=AGENCOURT_13318131 /CLONE=IMAGE:6874082 /TID=Xl.7509.2 /CNT=42 /FEA=EST /TIER=Stack /STK=19 /UG=Xl.7509 /UG_TITLE=Xenopus laevis, clone MGC:53454 IMAGE:5572019, mRNA, complete cds
Xl.24855.1.A1_at	4.16255	3.15648	3.15648	6.60451	6.05748	7.2098	6.31701	3.49183	6.5472	-3.05536	-8.50634	1.99142e-05	0.000206049	3.23503	gb:BJ099397 /DB_XREF=gi:17601674 /DB_XREF=BJ099397 /CLONE=XL150h24 /TID=Xl.24855.1 /CNT=7 /FEA=EST /TIER=ConsEnd /STK=1 /UG=Xl.24855 /UG_TITLE=ESTs
Xl.5187.1.S1_at	5.38649	3.40834	3.40834	7.16246	6.9238	7.87546	6.51888	4.06772	7.12015	-3.05243	-5.78151	0.000335815	0.00133454	0.233283	gb:CD326244 /DB_XREF=gi:31090575 /DB_XREF=AGENCOURT_14142315 /CLONE=IMAGE:6948329 /TID=Xl.5187.1 /CNT=17 /FEA=EST /TIER=Stack /STK=7 /UG=Xl.5187 /UG_TITLE=ESTs, Weakly similar to RIKEN cDNA 2210012G02 (Mus musculus) (M.musculus)
Xl.6973.1.S1_at	7.39838	6.99116	6.99116	10.8868	10.0973	10.0107	9.70779	7.1269	10.1756	-3.04874	-10.069	5.37334e-06	8.80308e-05	4.60833	gb:BF072033 /DB_XREF=gi:10848672 /DB_XREF=db50b09.x1 /CLONE=IMAGE:3301913 /TID=Xl.6973.1 /CNT=4 /FEA=EST /TIER=ConsEnd /STK=4 /UG=Xl.6973 /UG_TITLE=ESTs, Highly similar to dynein light chain 2B; bithoraxoid-like protein; roadblockLC7-like (Homo sapiens) (H.sapiens)
Xl.11414.1.A1_at	3.03721	3.08124	3.08124	5.6052	6.01671	6.07794	6.74826	3.06656	6.11203	-3.04546	-10.89	2.89056e-06	5.94947e-05	5.25097	gb:BG552599 /DB_XREF=gi:13564379 /DB_XREF=df44e10.x1 /CLONE=IMAGE:3581298 /TID=Xl.11414.1 /CNT=2 /FEA=EST /TIER=ConsEnd /STK=1 /UG=Xl.11414 /UG_TITLE=ESTs
Xl.7337.1.A1_at	2.71064	3.85445	3.85445	7.02423	5.82774	6.32416	6.88389	3.47318	6.515	-3.04182	-7.74416	4.05898e-05	0.000325118	2.48193	gb:AW148118 /DB_XREF=gi:6196014 /DB_XREF=da04c11.x1 /CLONE=XENOPUS_SOURCE_ID:xlnoc001n21 /TID=Xl.7337.1 /CNT=5 /FEA=EST /TIER=ConsEnd /STK=2 /UG=Xl.7337 /UG_TITLE=ESTs
Xl.15211.1.A1_at	4.94603	3.63992	3.63992	6.35526	7.02423	7.02423	8.04373	4.07529	7.11186	-3.03657	-6.61633	0.000129467	0.000682079	1.24905	gb:BJ078957 /DB_XREF=gi:17523873 /DB_XREF=BJ078957 /CLONE=XL066l04 /TID=Xl.15211.1 /CNT=4 /FEA=EST /TIER=ConsEnd /STK=2 /UG=Xl.15211 /UG_TITLE=ESTs, Weakly similar to likely ortholog of mouse ubiquitin-conjugating enzyme E2-230K (Homo sapiens) (H.sapiens)
Xl.10526.1.S1_a_at	3.89638	3.8639	3.8639	7.20668	7.10578	7.10578	6.22482	3.87473	6.91076	-3.03604	-11.0447	2.58373e-06	5.50541e-05	5.36667	gb:BM262146 /DB_XREF=gi:17925186 /DB_XREF=dag41d04.x3 /CLONE=IMAGE:4783926 /TID=Xl.10526.1 /CNT=4 /FEA=EST /TIER=ConsEnd /STK=0 /UG=Xl.10526 /UG_TITLE=ESTs, Moderately similar to egl nine homolog 1 (C. elegans); EGL nine (C.elegans) homolog 1; similar to rat smooth muscle protein SM-20; chromosome 1 open reading frame 12 (Homo sapiens) (H.sapiens)
Xl.7642.1.A1_at	6.78246	5.20511	5.20511	8.57373	8.88924	8.70891	8.87505	5.73089	8.76173	-3.03084	-7.80461	3.82851e-05	0.000314075	2.54389	gb:BE491156 /DB_XREF=gi:9610771 /DB_XREF=db45d04.x1 /CLONE=IMAGE:3301447 /TID=Xl.7642.1 /CNT=2 /FEA=EST /TIER=ConsEnd /STK=2 /UG=Xl.7642 /UG_TITLE=ESTs
Xl.24726.1.S1_at	4.11408	4.04159	4.04159	6.92955	7.30463	7.08468	7.04153	4.06576	7.0901	-3.02434	-15.6931	1.50364e-07	1.06601e-05	8.2153	gb:BJ045978 /DB_XREF=gi:17372682 /DB_XREF=BJ045978 /CLONE=XL005n22 /TID=Xl.24726.1 /CNT=20 /FEA=EST /TIER=ConsEnd /STK=5 /UG=Xl.24726 /UG_TITLE=ESTs, Weakly similar to chromosome 20 open reading frame 16 (Homo sapiens) (H.sapiens)
Xl.731.1.S1_at	3.51932	3.1918	3.1918	6.33006	6.70739	5.98942	6.27197	3.30097	6.32471	-3.02374	-12.9215	7.32835e-07	2.47548e-05	6.65077	gb:AF212298.1 /DB_XREF=gi:12003371 /GEN=XlSeptA /TID=Xl.731.1 /CNT=40 /FEA=FLmRNA /TIER=FL+Stack /STK=10 /UG=Xl.731 /DEF=Xenopus laevis septin A (XlSeptA) mRNA, complete cds. /PROD=septin A /FL=gb:AF212298.1
Xl.16288.1.A1_at	2.5212	2.6242	2.6242	5.53497	5.50615	5.82774	5.55568	2.58987	5.60613	-3.01627	-15.7082	1.49181e-07	1.06419e-05	8.22294	gb:BQ398834 /DB_XREF=gi:21086521 /DB_XREF=NISC_mo11e02.x1 /CLONE=IMAGE:5278946 /TID=Xl.16288.1 /CNT=4 /FEA=EST /TIER=ConsEnd /STK=2 /UG=Xl.16288 /UG_TITLE=ESTs, Weakly similar to zinc finger protein 93 homolog; zinc finger protein homologous to Zfp93 in mouse; zinc finger protein homologous to mouse Zfp93 (Homo sapiens) (H.sapiens)
Xl.3383.1.A1_at	5.55217	5.89971	5.89971	9.31215	8.84421	8.09551	8.93093	5.78387	8.7957	-3.01184	-9.98617	5.73387e-06	9.15358e-05	4.54071	gb:BF612178 /DB_XREF=gi:11782554 /DB_XREF=daa16c02.y1 /CLONE=IMAGE:4056195 /TID=Xl.3383.1 /CNT=13 /FEA=EST /TIER=ConsEnd /STK=0 /UG=Xl.3383 /UG_TITLE=ESTs, Moderately similar to COPA_HUMAN Coatomer alpha subunit (Alpha-coat protein) (Alpha-COP) (HEPCOP) (HEP-COP) (Contains: Xenin (Xenopsin-related peptide); Proxenin) (H.sapiens)
Xl.14402.2.A1_x_at	5.77241	3.20361	3.20361	6.97274	7.58834	7.19989	6.51627	4.05988	7.06931	-3.00944	-4.9036	0.00101067	0.00302499	-0.939802	gb:BJ092913 /DB_XREF=gi:17592252 /DB_XREF=BJ092913 /CLONE=XL057n03 /TID=Xl.14402.2 /CNT=4 /FEA=EST /TIER=ConsEnd /STK=2 /UG=Xl.14402 /UG_TITLE=ESTs, Moderately similar to gamma filamin; filamin C, gamma (actin-binding protein-280); filamin 2; actin-binding protein 280 (Homo sapiens) (H.sapiens)
Xl.26072.1.S1_at	6.44414	6.8443	6.8443	10.536	9.68326	10.2348	8.40578	6.71091	9.71496	-3.00405	-6.36804	0.000170358	0.000827299	0.956639	gb:BJ092674 /DB_XREF=gi:17591898 /DB_XREF=BJ092674 /CLONE=XL057a22 /TID=Xl.26072.1 /CNT=41 /FEA=EST /TIER=Stack /STK=11 /UG=Xl.26072 /UG_TITLE=ESTs, Moderately similar to MDHC_HUMAN Malate dehydrogenase, cytoplasmic (H.sapiens)
Xl.6320.1.S1_at	4.09093	3.08284	3.08284	7.64916	7.83556	2.97736	7.20339	3.41887	6.41637	-2.9975	-2.75879	0.0234579	0.0403193	-4.22528	gb:BI443662 /DB_XREF=gi:15268369 /DB_XREF=dai93a12.y1 /CLONE=IMAGE:5047966 /TID=Xl.6320.1 /CNT=16 /FEA=EST /TIER=ConsEnd /STK=0 /UG=Xl.6320 /UG_TITLE=ESTs, Weakly similar to CGI-105 protein (Homo sapiens) (H.sapiens)
Xl.1183.1.S1_at	3.15648	3.26707	3.26707	7.02423	5.42047	6.03661	6.4282	3.23021	6.22738	-2.99717	-8.43267	2.12845e-05	0.000214953	3.16481	gb:BG439723 /DB_XREF=gi:13349373 /DB_XREF=dab26c04.x1 /CLONE=IMAGE:4175598 /TID=Xl.1183.1 /CNT=14 /FEA=mRNA /TIER=ConsEnd /STK=1 /UG=Xl.1183 /UG_TITLE=X.laevis FIII mRNA
Xl.7640.1.S1_at	3.97972	4.89102	4.89102	7.59374	7.38561	7.80678	7.54589	4.58725	7.583	-2.99575	-10.852	2.97201e-06	6.07358e-05	5.22228	gb:BC043840.1 /DB_XREF=gi:27696918 /TID=Xl.7640.1 /CNT=28 /FEA=FLmRNA /TIER=FL /STK=2 /UG=Xl.7640 /DEF=Xenopus laevis, Similar to golgi reassembly stacking protein 2, clone MGC:53281 IMAGE:5570110, mRNA, complete cds. /PROD=Similar to golgi reassembly stacking protein 2 /FL=gb:BC043840.1
Xl.5547.1.S1_at	6.43713	5.90013	5.90013	9.15219	8.73101	8.90567	9.50668	6.07913	9.07389	-2.99476	-11.4475	1.94149e-06	4.65511e-05	5.66042	gb:BJ092671 /DB_XREF=gi:17591894 /DB_XREF=BJ092671 /CLONE=XL057a18 /TID=Xl.5547.1 /CNT=35 /FEA=EST /TIER=Stack /STK=6 /UG=Xl.5547 /UG_TITLE=ESTs, Moderately similar to chromosome 11 hypothetical protein ORF3 (Homo sapiens) (H.sapiens)
Xl.24301.1.S1_at	4.53541	4.43644	4.43644	8.42542	7.02454	7.02708	7.37447	4.46943	7.46288	-2.99345	-8.53483	1.94107e-05	0.000202034	3.26204	gb:CB560201 /DB_XREF=gi:29479731 /DB_XREF=AGENCOURT_13318438 /CLONE=IMAGE:6878734 /TID=Xl.24301.1 /CNT=122 /FEA=EST /TIER=Stack /STK=9 /UG=Xl.24301 /UG_TITLE=ESTs
Xl.8388.2.S1_at	7.0025	6.94239	6.94239	9.95991	9.9594	9.7287	10.1752	6.96242	9.95581	-2.99338	-15.1913	1.96262e-07	1.16766e-05	7.95676	gb:AW767767 /DB_XREF=gi:7699777 /DB_XREF=da79c04.x1 /CLONE=IMAGE:3201126 /TID=Xl.8388.2 /CNT=49 /FEA=EST /TIER=Stack /STK=16 /UG=Xl.8388 /UG_TITLE=Xenopus laevis, similar to Ubiquinol-cytochrome C reductase complex, clone MGC:53943 IMAGE:5570350, mRNA, complete cds
Xl.2845.1.A1_at	5.67363	5.8531	5.8531	9.2018	8.71757	8.68693	8.53579	5.79328	8.78553	-2.99225	-13.3149	5.74796e-07	2.1024e-05	6.89469	gb:BG017220 /DB_XREF=gi:12471234 /DB_XREF=de62e03.x1 /CLONE=IMAGE:3516365 /TID=Xl.2845.1 /CNT=10 /FEA=EST /TIER=ConsEnd /STK=5 /UG=Xl.2845 /UG_TITLE=ESTs, Weakly similar to hypothetical protein FLJ10511 (Homo sapiens) (H.sapiens)
Xl.15329.1.A1_at	3.92754	5.47275	5.47275	8.19078	7.79196	8.45136	7.33303	4.95768	7.94178	-2.98411	-6.83087	0.00010273	0.000586186	1.49535	gb:BJ045379 /DB_XREF=gi:17420132 /DB_XREF=BJ045379 /CLONE=XL003p20 /TID=Xl.15329.1 /CNT=7 /FEA=EST /TIER=ConsEnd /STK=4 /UG=Xl.15329 /UG_TITLE=ESTs, Moderately similar to hypothetical protein MGC10924 similar to Nedd4 WW-binding protei (Homo sapiens) (H.sapiens)
Xl.5877.1.S1_at	6.25775	4.61615	4.61615	8.0995	8.0995	8.65446	7.73498	5.16335	8.14711	-2.98376	-6.92856	9.26198e-05	0.00054719	1.6056	gb:BC043913.1 /DB_XREF=gi:27694983 /TID=Xl.5877.1 /CNT=61 /FEA=FLmRNA /TIER=FL+Stack /STK=13 /UG=Xl.5877 /DEF=Xenopus laevis, clone MGC:53929 IMAGE:5570077, mRNA, complete cds. /PROD=Unknown (protein for MGC:53929) /FL=gb:BC043913.1 gb:D13700.1
Xl.807.1.S1_at	3.36088	2.73942	2.73942	5.00859	3.60672	7.45985	7.6437	2.94657	5.92971	-2.98314	-3.24666	0.0109113	0.0212077	-3.44144	gb:X72620.1 /DB_XREF=gi:288274 /GEN=xamyb /TID=Xl.807.1 /CNT=4 /FEA=mRNA /TIER=ConsEnd /STK=0 /UG=Xl.807 /DEF=X.laevis XAMYB mRNA. /PROD=XAMYB
Xl.7357.1.A1_at	7.26376	7.25282	7.25282	10.5537	9.93627	9.89412	10.5678	7.25647	10.238	-2.98151	-12.1118	1.23506e-06	3.50238e-05	6.12247	gb:AU244899 /DB_XREF=gi:18850828 /DB_XREF=AU244899 /CLONE=p8b4 /TID=Xl.7357.1 /CNT=6 /FEA=EST /TIER=ConsEnd /STK=3 /UG=Xl.7357 /UG_TITLE=ESTs, Weakly similar to cytochrome c oxidase subunit Vb precursor (Homo sapiens) (H.sapiens)
Xl.13684.1.A1_at	4.39444	5.26736	5.26736	8.51246	8.02249	7.41357	7.88103	4.97639	7.95739	-2.981	-9.0229	1.26496e-05	0.00015165	3.71281	gb:BJ082919 /DB_XREF=gi:17577763 /DB_XREF=BJ082919 /CLONE=XL083h23 /TID=Xl.13684.1 /CNT=2 /FEA=EST /TIER=ConsEnd /STK=1 /UG=Xl.13684 /UG_TITLE=ESTs
Xl.3531.1.A1_at	3.2672	3.86998	3.86998	5.7079	6.73481	6.77083	7.36873	3.66905	6.64557	-2.97652	-7.76819	3.96557e-05	0.000319827	2.50661	gb:BJ086915 /DB_XREF=gi:17583514 /DB_XREF=BJ086915 /CLONE=XL054n02 /TID=Xl.3531.1 /CNT=3 /FEA=EST /TIER=ConsEnd /STK=2 /UG=Xl.3531 /UG_TITLE=ESTs, Weakly similar to Y222_HUMAN Hypothetical zinc finger protein KIAA0222 (H.sapiens)
Xl.13284.1.A1_at	5.14332	5.17298	5.17298	8.79463	7.64429	8.09076	8.02117	5.16309	8.13771	-2.97462	-10.5525	3.71077e-06	6.93108e-05	4.99272	gb:BJ088523 /DB_XREF=gi:17585833 /DB_XREF=BJ088523 /CLONE=XL093e18 /TID=Xl.13284.1 /CNT=3 /FEA=EST /TIER=ConsEnd /STK=3 /UG=Xl.13284 /UG_TITLE=ESTs, Weakly similar to JC7165 mitochondrial ribosomal protein S7 small chain precursor - human (H.sapiens)
Xl.21101.1.S1_at	4.28199	4.12707	4.12707	7.30626	7.52363	7.60914	6.16829	4.17871	7.15183	-2.97312	-8.40262	2.1873e-05	0.000218635	3.13602	gb:BC043773.1 /DB_XREF=gi:27696262 /TID=Xl.21101.1 /CNT=10 /FEA=FLmRNA /TIER=FL /STK=5 /UG=Xl.21101 /DEF=Xenopus laevis, Similar to transformed mouse 3T3 cell double minute 4, clone MGC:52974 IMAGE:4930641, mRNA, complete cds. /PROD=Similar to transformed mouse 3T3 cell doubleminute 4 /FL=gb:BC043773.1
Xl.14738.1.A1_at	4.30483	4.42126	4.42126	8.02633	7.23107	7.20167	6.95135	4.38245	7.3526	-2.97015	-10.6759	3.38413e-06	6.51034e-05	5.08809	gb:BM179208 /DB_XREF=gi:17403279 /DB_XREF=dai16e04.x1 /CLONE=IMAGE:4959463 /TID=Xl.14738.1 /CNT=1 /FEA=EST /TIER=ConsEnd /STK=1 /UG=Xl.14738 /UG_TITLE=EST
Xl.23786.1.S1_at	4.51628	4.73706	4.73706	7.77286	7.44762	7.39655	7.90711	4.66347	7.63103	-2.96756	-13.7207	4.50437e-07	1.82801e-05	7.13815	gb:BG555895 /DB_XREF=gi:13567675 /DB_XREF=df22g02.x1 /CLONE=IMAGE:3558314 /TID=Xl.23786.1 /CNT=20 /FEA=EST /TIER=ConsEnd /STK=5 /UG=Xl.23786 /UG_TITLE=ESTs, Moderately similar to RU2A_HUMAN U2 small nuclear ribonucleoprotein A (U2 snRNP-A) (H.sapiens)
Xl.21405.1.S1_at	8.25991	7.91857	7.91857	11.7108	11.1536	10.955	10.1418	8.03235	10.9903	-2.95795	-8.38271	2.2273e-05	0.000220903	3.11689	gb:CD302215 /DB_XREF=gi:31082010 /DB_XREF=AGENCOURT_14233728 /CLONE=IMAGE:6958170 /TID=Xl.21405.1 /CNT=5 /FEA=EST /TIER=ConsEnd /STK=0 /UG=Xl.21405 /UG_TITLE=ESTs, Weakly similar to NADH dehydrogenase (ubiquinone) 1 beta subcomplex, 10 (22kD, PDSW) (Homo sapiens) (H.sapiens)
Xl.17276.1.S1_at	3.15648	4.67022	4.67022	7.19244	7.73708	7.36051	6.19799	4.16564	7.12201	-2.95637	-6.21373	0.000202804	0.000938059	0.770846	gb:BG022088 /DB_XREF=gi:12478167 /DB_XREF=dg22a06.x1 /CLONE=IMAGE:3749291 /TID=Xl.17276.1 /CNT=5 /FEA=EST /TIER=ConsEnd /STK=1 /UG=Xl.17276 /UG_TITLE=ESTs, Weakly similar to putative protein (Arabidopsis thaliana) (A.thaliana)
Xl.12976.1.S1_at	2.46551	3.59571	3.59571	5.85618	5.07137	7.01118	6.7606	3.21898	6.17483	-2.95586	-5.87211	0.000301523	0.00123458	0.348095	gb:BC043758.1 /DB_XREF=gi:27694632 /TID=Xl.12976.1 /CNT=3 /FEA=FLmRNA /TIER=FL /STK=1 /UG=Xl.12976 /DEF=Xenopus laevis, clone MGC:52909 IMAGE:4889418, mRNA, complete cds. /PROD=Unknown (protein for MGC:52909) /FL=gb:BC043758.1
Xl.15.1.S1_at	3.65982	3.26707	3.26707	6.40596	6.32672	5.95536	6.71747	3.39799	6.35138	-2.95339	-12.1405	1.21183e-06	3.47078e-05	6.14179	gb:X92872.1 /DB_XREF=gi:1483620 /TID=Xl.15.1 /CNT=2 /FEA=mRNA /TIER=ConsEnd /STK=0 /UG=Xl.15 /DEF=X.laevis mRNA for secretogranin III. /PROD=secretogranin III
Xl.25584.1.A1_at	4.5469	5.14656	5.14656	7.82914	7.42501	8.17065	8.1708	4.94667	7.8989	-2.95222	-10.8286	3.02342e-06	6.11337e-05	5.20457	gb:BF232165 /DB_XREF=gi:11174531 /DB_XREF=de01d09.x1 /CLONE=IMAGE:3436840 /TID=Xl.25584.1 /CNT=14 /FEA=EST /TIER=Stack /STK=9 /UG=Xl.25584 /UG_TITLE=ESTs, Weakly similar to CHMP1.5 protein (Homo sapiens) (H.sapiens)
Xl.7530.1.S1_at	7.64298	7.34981	7.34981	10.0773	10.1914	10.6808	10.6444	7.44753	10.3985	-2.95096	-12.5291	9.40139e-07	2.92291e-05	6.39932	gb:BC046373.1 /DB_XREF=gi:28386022 /TID=Xl.7530.1 /CNT=57 /FEA=FLmRNA /TIER=FL+Stack /STK=12 /UG=Xl.7530 /DEF=Xenopus laevis, Similar to karyopherin alpha 2 (RAG cohort 1, importin alpha 1), clone MGC:53789 IMAGE:5537537, mRNA, complete cds. /PROD=Similar to karyopherin alpha 2 (RAG cohort 1,importin alpha 1) /FL=gb:BC046373.1
Xl.10525.1.A1_at	4.56887	4.44402	4.44402	7.95706	7.40082	7.46837	6.90605	4.48564	7.43307	-2.94744	-11.0814	2.5164e-06	5.39195e-05	5.39387	gb:BE678195 /DB_XREF=gi:10059625 /DB_XREF=df83g06.x1 /CLONE=IMAGE:3745978 /TID=Xl.10525.1 /CNT=1 /FEA=EST /TIER=ConsEnd /STK=1 /UG=Xl.10525 /UG_TITLE=ESTs
Xl.15143.1.S1_at	2.87078	4.37895	4.37895	6.96889	6.16308	7.27832	6.88389	3.87623	6.82355	-2.94732	-6.90085	9.53714e-05	0.000557993	1.57445	gb:BJ046852 /DB_XREF=gi:17408538 /DB_XREF=BJ046852 /CLONE=XL014l10 /TID=Xl.15143.1 /CNT=6 /FEA=EST /TIER=ConsEnd /STK=3 /UG=Xl.15143 /UG_TITLE=ESTs, Moderately similar to RIKEN cDNA 1110030J09 (Mus musculus) (M.musculus)
Xl.24309.1.A1_at	4.05487	4.93514	4.93514	8.1047	7.74692	7.64121	6.86142	4.64171	7.58856	-2.94685	-8.36299	2.26771e-05	0.000222511	3.09791	gb:AW148045 /DB_XREF=gi:6195941 /DB_XREF=da03c10.x1 /CLONE=XENOPUS_SOURCE_ID:xlnoc001j19 /TID=Xl.24309.1 /CNT=7 /FEA=EST /TIER=ConsEnd /STK=3 /UG=Xl.24309 /UG_TITLE=ESTs, Moderately similar to I38205 sterol carrier protein-Xsterol carrier protein-2 - human (H.sapiens)
Xl.24281.1.A1_at	8.68332	8.33523	8.33523	11.4316	11.7496	11.3449	11.0645	8.45126	11.3977	-2.9464	-12.7005	8.42489e-07	2.69977e-05	6.51018	gb:CB560563 /DB_XREF=gi:29480093 /DB_XREF=AGENCOURT_13321677 /CLONE=IMAGE:6879933 /TID=Xl.24281.1 /CNT=3 /FEA=EST /TIER=ConsEnd /STK=1 /UG=Xl.24281 /UG_TITLE=ESTs, Highly similar to HS9A_HUMAN Heat shock protein HSP 90-alpha (HSP 86) (H.sapiens)
Xl.8273.1.A1_at	3.15648	4.55684	4.55684	7.68064	7.21731	6.98247	6.25924	4.09005	7.03492	-2.94486	-6.67441	0.000121545	0.00065292	1.3163	gb:AW147828 /DB_XREF=gi:6195724 /DB_XREF=da05g05.x1 /CLONE=XENOPUS_SOURCE_ID:xlnoc002d09 /TID=Xl.8273.1 /CNT=1 /FEA=EST /TIER=ConsEnd /STK=1 /UG=Xl.8273 /UG_TITLE=EST
Xl.6977.1.S1_at	7.41587	7.37026	7.37026	10.5028	10.2148	9.92682	10.6726	7.38546	10.3293	-2.9438	-12.6495	8.70357e-07	2.75373e-05	6.47731	gb:AW633145 /DB_XREF=gi:7390226 /DB_XREF=bl04c07.x1 /CLONE=PBX0004C07 /TID=Xl.6977.1 /CNT=9 /FEA=EST /TIER=ConsEnd /STK=0 /UG=Xl.6977 /UG_TITLE=ESTs, Moderately similar to putative cyclin G1 interacting protein (Homo sapiens) (H.sapiens)
Xl.4911.1.A1_at	4.60695	4.67955	4.67955	7.76488	7.59955	7.44841	7.58223	4.65535	7.59876	-2.94342	-15.6209	1.56166e-07	1.07399e-05	8.17869	gb:BJ085905 /DB_XREF=gi:17582091 /DB_XREF=BJ085905 /CLONE=XL051g16 /TID=Xl.4911.1 /CNT=13 /FEA=EST /TIER=Stack /STK=7 /UG=Xl.4911 /UG_TITLE=ESTs, Highly similar to similar to yeast BET3 (Homo sapiens) (H.sapiens)
Xl.24070.1.S1_at	4.10576	4.43451	4.43451	6.98545	7.77667	6.68098	7.62441	4.32492	7.26688	-2.94196	-9.66659	7.39969e-06	0.000106947	4.27463	gb:AW782625 /DB_XREF=gi:7797231 /DB_XREF=da96d01.x1 /TID=Xl.24070.1 /CNT=20 /FEA=EST /TIER=ConsEnd /STK=2 /UG=Xl.24070 /UG_TITLE=ESTs, Highly similar to cornichon-like (Homo sapiens) (H.sapiens)
Xl.6461.1.S1_at	4.59033	4.90984	4.90984	8.48459	8.09627	7.22814	7.17211	4.80334	7.74528	-2.94194	-8.36251	2.2687e-05	0.000222511	3.09745	gb:BQ388250 /DB_XREF=gi:21075937 /DB_XREF=NISC_mn28e01.x1 /CLONE=IMAGE:5074657 /TID=Xl.6461.1 /CNT=6 /FEA=EST /TIER=ConsEnd /STK=0 /UG=Xl.6461 /UG_TITLE=ESTs, Weakly similar to hypothetical protein MGC14833 (Homo sapiens) (H.sapiens)
Xl.7226.1.S1_at	5.28146	3.45477	3.45477	6.7308	6.79919	7.15648	7.33154	4.06366	7.0045	-2.94084	-6.53948	0.000140837	0.000722103	1.15939	gb:BG161320 /DB_XREF=gi:12695239 /DB_XREF=dab68f09.x1 /CLONE=IMAGE:4202272 /TID=Xl.7226.1 /CNT=38 /FEA=FLmRNA /TIER=Stack /STK=11 /UG=Xl.7226 /UG_TITLE=Xenopus laevis, similar to Aspartate aminotransferase, clone MGC:52828 IMAGE:4884635, mRNA, complete cds /FL=gb:BC045269.1
Xl.7462.1.A1_at	5.24879	6.09504	6.09504	8.18286	8.83042	9.17368	8.81087	5.81295	8.74946	-2.9365	-9.28745	1.01096e-05	0.000130166	3.94805	gb:BJ083895 /DB_XREF=gi:17579165 /DB_XREF=BJ083895 /CLONE=XL086i17 /TID=Xl.7462.1 /CNT=14 /FEA=EST /TIER=Stack /STK=8 /UG=Xl.7462 /UG_TITLE=ESTs, Moderately similar to GAK_HUMAN Cyclin G-associated kinase (H.sapiens)
Xl.15346.1.A1_at	3.2653	4.78632	4.78632	7.29028	7.82485	6.98758	6.75734	4.27931	7.21501	-2.9357	-6.87769	9.77399e-05	0.000566941	1.54835	gb:BQ398446 /DB_XREF=gi:21086133 /DB_XREF=NISC_mo07f12.x1 /CLONE=IMAGE:5162662 /TID=Xl.15346.1 /CNT=13 /FEA=EST /TIER=Stack /STK=7 /UG=Xl.15346 /UG_TITLE=ESTs, Weakly similar to neurofilament, heavy polypeptide (200kD); Neurofilament, heavy polypeptide (Homo sapiens) (H.sapiens)
Xl.11115.1.A1_at	4.98044	3.04127	3.04127	7.36614	7.58834	4.73706	6.78432	3.68766	6.61897	-2.9313	-3.93795	0.00385914	0.00894134	-2.35708	gb:BJ092772 /DB_XREF=gi:17592040 /DB_XREF=BJ092772 /CLONE=XL057f18 /TID=Xl.11115.1 /CNT=5 /FEA=EST /TIER=ConsEnd /STK=4 /UG=Xl.11115 /UG_TITLE=ESTs, Moderately similar to phosphofructokinase, platelet; Phosphofructokinase, platelet type (Homo sapiens) (H.sapiens)
Xl.4720.1.S1_at	6.36552	4.84027	4.84027	7.29114	8.07372	8.80489	8.94111	5.34869	8.27772	-2.92903	-5.76375	0.000343025	0.00135709	0.21064	gb:AB082534.1 /DB_XREF=gi:23491714 /GEN=Xgly4 /TID=Xl.4720.1 /CNT=28 /FEA=FLmRNA /TIER=FL+Stack /STK=7 /UG=Xl.4720 /DEF=Xenopus laevis Xgly4 mRNA for glypican-4, complete cds. /PROD=glypican-4 /FL=gb:AB082534.1
Xl.9359.1.A1_at	4.67809	3.04127	3.04127	7.06496	5.66116	6.63826	6.68626	3.58688	6.51266	-2.92578	-6.11182	0.000227921	0.00101578	0.646395	gb:BJ086197 /DB_XREF=gi:17582503 /DB_XREF=BJ086197 /CLONE=XL052f02 /TID=Xl.9359.1 /CNT=9 /FEA=EST /TIER=ConsEnd /STK=5 /UG=Xl.9359 /UG_TITLE=ESTs, Weakly similar to TF1B_HUMAN Transcription intermediary factor 1-beta (TIF1-beta) (Nuclear corepressor KAP-1) (KRAB-associated protein 1) (H.sapiens)
Xl.19478.1.S1_at	2.60647	3.8349	3.8349	6.65967	5.31615	7.0006	6.39986	3.42543	6.34407	-2.91864	-6.35634	0.000172606	0.000835389	0.942671	gb:AF393212.1 /DB_XREF=gi:21666367 /TID=Xl.19478.1 /CNT=2 /FEA=FLmRNA /TIER=FL /STK=1 /UG=Xl.19478 /DEF=Xenopus laevis leucine-rich protein mRNA, complete cds. /PROD=leucine-rich protein /FL=gb:AF393212.1
Xl.7915.1.A1_at	3.95061	2.68743	2.68743	7.00627	5.95928	6.51722	4.60014	3.10849	6.02073	-2.91224	-5.08069	0.000802236	0.00252637	-0.694222	gb:BJ083507 /DB_XREF=gi:17578606 /DB_XREF=BJ083507 /CLONE=XL085g06 /TID=Xl.7915.1 /CNT=3 /FEA=EST /TIER=ConsEnd /STK=2 /UG=Xl.7915 /UG_TITLE=ESTs
Xl.7178.1.A1_at	5.9487	5.43251	5.43251	8.58074	8.54946	7.88365	9.031	5.60457	8.51121	-2.90664	-9.67487	7.35028e-06	0.000106454	4.28163	gb:CD362808 /DB_XREF=gi:31134219 /DB_XREF=AGENCOURT_14234938 /CLONE=IMAGE:6956252 /TID=Xl.7178.1 /CNT=7 /FEA=EST /TIER=Stack /STK=6 /UG=Xl.7178 /UG_TITLE=ESTs
Xl.16742.1.A1_at	6.11855	6.14155	6.14155	8.84336	8.64325	9.19056	9.47392	6.13388	9.03777	-2.90389	-11.8675	1.45477e-06	3.84092e-05	5.95566	gb:BJ046472 /DB_XREF=gi:17400063 /DB_XREF=BJ046472 /CLONE=XL007h19 /TID=Xl.16742.1 /CNT=5 /FEA=EST /TIER=ConsEnd /STK=5 /UG=Xl.16742 /UG_TITLE=ESTs
Xl.12988.1.A1_at	4.18219	2.39359	2.39359	5.88249	6.24662	6.00908	5.42775	2.98979	5.89149	-2.90169	-6.43474	0.000158134	0.000782158	1.03598	gb:BJ098578 /DB_XREF=gi:17600450 /DB_XREF=BJ098578 /CLONE=XL147d09 /TID=Xl.12988.1 /CNT=2 /FEA=EST /TIER=ConsEnd /STK=1 /UG=Xl.12988 /UG_TITLE=ESTs
Xl.21869.1.S1_at	4.2553	4.83535	4.83535	7.82755	6.98307	7.58515	7.77159	4.642	7.54184	-2.89984	-10.371	4.25634e-06	7.53221e-05	4.85051	gb:BC045041.1 /DB_XREF=gi:27924280 /TID=Xl.21869.1 /CNT=2 /FEA=mRNA /TIER=ConsEnd /STK=1 /UG=Xl.21869 /UG_TITLE=Xenopus laevis, clone IMAGE:5543466, mRNA, partial cds /DEF=Xenopus laevis, clone IMAGE:5543466, mRNA, partial cds.
Xl.25636.1.S1_at	6.32672	6.44523	6.44523	9.11815	9.19157	9.14806	9.76261	6.40573	9.3051	-2.89937	-12.7314	8.26131e-07	2.66238e-05	6.52998	gb:AF270484.1 /DB_XREF=gi:8515824 /TID=Xl.25636.1 /CNT=57 /FEA=FLmRNA /TIER=FL+Stack /STK=20 /UG=Xl.25636 /DEF=Xenopus laevis transketolase mRNA, complete cds. /PROD=transketolase /FL=gb:AF270484.1
Xl.7611.1.S1_a_at	4.8814	4.98634	4.98634	8.58173	7.57542	7.02989	8.21547	4.95136	7.85063	-2.89927	-8.04091	3.05669e-05	0.000269336	2.7823	gb:AW632987 /DB_XREF=gi:7390067 /DB_XREF=bl02e08.x1 /CLONE=PBX0002E08 /TID=Xl.7611.1 /CNT=6 /FEA=EST /TIER=ConsEnd /STK=0 /UG=Xl.7611 /UG_TITLE=ESTs, Weakly similar to FGFR1 oncogene partner (Homo sapiens) (H.sapiens)
Xl.16853.1.S1_at	5.45205	5.50615	5.50615	8.43888	7.91967	7.52854	9.66187	5.48811	8.38724	-2.89913	-6.32535	0.000178722	0.000857045	0.905564	gb:BG579925 /DB_XREF=gi:13594989 /DB_XREF=dab79d07.x1 /CLONE=IMAGE:4203301 /TID=Xl.16853.1 /CNT=4 /FEA=EST /TIER=ConsEnd /STK=1 /UG=Xl.16853 /UG_TITLE=ESTs
Xl.18919.1.S1_at	5.4463	6.09944	6.09944	8.45331	8.20916	8.62462	9.82519	5.88173	8.77807	-2.89634	-7.28131	6.42739e-05	0.000436022	1.99409	gb:BI448165 /DB_XREF=gi:15272872 /DB_XREF=dac72b04.x1 /CLONE=IMAGE:4435519 /TID=Xl.18919.1 /CNT=2 /FEA=EST /TIER=ConsEnd /STK=1 /UG=Xl.18919 /UG_TITLE=ESTs
Xl.26404.1.A1_at	4.40316	3.68188	3.68188	7.36427	6.49784	7.17552	6.22432	3.9223	6.81549	-2.89319	-8.47759	2.04369e-05	0.000209757	3.20769	gb:CD360600 /DB_XREF=gi:31132011 /DB_XREF=AGENCOURT_14239272 /CLONE=IMAGE:6957011 /TID=Xl.26404.1 /CNT=2 /FEA=EST /TIER=ConsEnd /STK=2 /UG=Xl.26404 /UG_TITLE=ESTs
Xl.4048.1.S1_at	5.00135	4.86001	4.86001	7.25058	7.4227	7.86491	8.62043	4.90712	7.78966	-2.88253	-8.69057	1.68956e-05	0.000184454	3.40831	gb:U66710.1 /DB_XREF=gi:2231292 /GEN=CDC47-2 /TID=Xl.4048.1 /CNT=111 /FEA=FLmRNA /TIER=FL+Stack /STK=34 /UG=Xl.4048 /DEF=Xenopus CDC47-2p (CDC47-2) mRNA, complete cds. /PROD=CDC47-2p /FL=gb:U66710.1 gb:BC045072.1
Xl.16501.1.S1_at	5.55217	5.10604	5.10604	8.40845	7.72593	8.09114	8.31925	5.25475	8.13619	-2.88144	-11.7533	1.57205e-06	4.08484e-05	5.87649	gb:BC045101.1 /DB_XREF=gi:27882014 /TID=Xl.16501.1 /CNT=16 /FEA=mRNA /TIER=ConsEnd /STK=0 /UG=Xl.16501 /UG_TITLE=Xenopus laevis, clone IMAGE:5542424, mRNA /DEF=Xenopus laevis, clone IMAGE:5542424, mRNA.
Xl.5351.1.A1_at	2.77435	4.23017	4.23017	6.1251	6.32732	6.78096	7.26152	3.74489	6.62373	-2.87883	-6.74465	0.000112666	0.000620735	1.39706	gb:BJ089437 /DB_XREF=gi:17587158 /DB_XREF=BJ089437 /CLONE=XL098i12 /TID=Xl.5351.1 /CNT=7 /FEA=EST /TIER=Stack /STK=6 /UG=Xl.5351 /UG_TITLE=ESTs, Highly similar to LIM domain containing preferred translocation partner in lipoma; LIM domain-containing preferred translocation partner in lipoma; Lipoma-preferred-partner gene (Homo sapiens) (H.sapiens)
Xl.5675.1.S1_at	6.93191	7.30228	7.30228	10.6671	10.2704	10.2458	9.04359	7.17883	10.0567	-2.8779	-7.68647	4.29325e-05	0.000336573	2.42244	gb:BE026636 /DB_XREF=gi:8319997 /DB_XREF=db29c12.x1 /CLONE=XENOPUS_SOURCE_ID: /TID=Xl.5675.1 /CNT=4 /FEA=EST /TIER=ConsEnd /STK=1 /UG=Xl.5675 /UG_TITLE=ESTs, Weakly similar to MKP-1 like protein tyrosine phosphatase (Homo sapiens) (H.sapiens)
Xl.3609.1.A1_at	5.89015	5.82774	5.82774	8.4812	8.06336	8.79843	9.56087	5.84854	8.72596	-2.87742	-8.49227	2.01682e-05	0.000208115	3.22166	gb:CA980957 /DB_XREF=gi:27513611 /DB_XREF=AGENCOURT_11283492 /CLONE=IMAGE:6869664 /TID=Xl.3609.1 /CNT=9 /FEA=EST /TIER=ConsEnd /STK=0 /UG=Xl.3609 /UG_TITLE=ESTs, Moderately similar to RU2B_HUMAN U2 small nuclear ribonucleoprotein B (H.sapiens)
Xl.5366.1.S1_at	5.39317	6.60543	6.60543	9.31084	8.95761	8.97654	9.06651	6.20134	9.07788	-2.87653	-8.88553	1.42417e-05	0.000164226	3.58818	gb:BG812248 /DB_XREF=gi:14183228 /DB_XREF=daf68b07.x1 /CLONE=IMAGE:4743516 /TID=Xl.5366.1 /CNT=44 /FEA=mRNA /TIER=ConsEnd /STK=1 /UG=Xl.5366 /UG_TITLE=Xenopus laevis U1 70K mRNA
Xl.20904.1.S1_at	4.98044	5.38469	5.38469	7.00478	7.41996	9.20968	8.87021	5.24994	8.12616	-2.87622	-5.43992	0.000509056	0.00179893	-0.210008	gb:AW148017 /DB_XREF=gi:6195913 /DB_XREF=da01h09.x1 /CLONE=XENOPUS_SOURCE_ID:xlnoc001d18 /TID=Xl.20904.1 /CNT=87 /FEA=EST /TIER=Stack /STK=23 /UG=Xl.20904 /UG_TITLE=ESTs, Moderately similar to transcriptional coactivator; bZIP enhancing factor (Homo sapiens) (H.sapiens)
Xl.21074.1.S1_at	3.06606	3.63992	3.63992	7.31528	7.51553	5.50752	4.95125	3.44864	6.3224	-2.87376	-4.6104	0.00149635	0.00412519	-1.35638	gb:BU900246 /DB_XREF=gi:24082159 /DB_XREF=AGENCOURT_10239812 /CLONE=IMAGE:6317002 /TID=Xl.21074.1 /CNT=1 /FEA=EST /TIER=ConsEnd /STK=1 /UG=Xl.21074 /UG_TITLE=ESTs
Xl.3862.1.S1_x_at	8.69188	8.30508	8.30508	11.5551	11.0148	11.4397	11.214	8.43401	11.3059	-2.87189	-12.7667	8.0786e-07	2.6284e-05	6.55254	gb:AF467942.1 /DB_XREF=gi:18656839 /GEN=SUI1 /TID=Xl.3862.1 /CNT=72 /FEA=FLmRNA /TIER=FL+Stack /STK=8 /UG=Xl.3862 /DEF=Xenopus laevis translation initiation factor SUI1 (SUI1) mRNA, complete cds. /PROD=translation initiation factor SUI1 /FL=gb:AF467942.1
Xl.15906.2.A1_at	2.96156	2.9975	2.9975	5.64648	6.21408	6.04315	5.52213	2.98552	5.85646	-2.87094	-12.3759	1.03824e-06	3.19683e-05	6.29878	gb:BJ044232 /DB_XREF=gi:17397721 /DB_XREF=BJ044232 /CLONE=XL012k13 /TID=Xl.15906.2 /CNT=3 /FEA=EST /TIER=ConsEnd /STK=1 /UG=Xl.15906 /UG_TITLE=ESTs
Xl.8883.1.A1_at	5.33895	5.3177	5.3177	8.63337	7.66158	8.15043	8.33696	5.32478	8.19559	-2.87081	-11.1573	2.38316e-06	5.17403e-05	5.44986	gb:BG439052 /DB_XREF=gi:13348702 /DB_XREF=dab17c08.x1 /CLONE=IMAGE:4174479 /TID=Xl.8883.1 /CNT=2 /FEA=EST /TIER=ConsEnd /STK=1 /UG=Xl.8883 /UG_TITLE=ESTs
Xl.9548.1.A1_at	3.97113	4.42328	4.42328	7.47746	7.65205	7.79025	5.63267	4.27257	7.13811	-2.86555	-5.69744	0.000371476	0.00142976	0.125716	gb:BG023082 /DB_XREF=gi:12479161 /DB_XREF=dab11e08.x1 /CLONE=IMAGE:4174167 /TID=Xl.9548.1 /CNT=1 /FEA=EST /TIER=ConsEnd /STK=1 /UG=Xl.9548 /UG_TITLE=ESTs, Moderately similar to KJHUG6 N-acetylgalactosamine-6-sulfatase (EC 3.1.6.4) precursor - human (H.sapiens)
Xl.25662.1.A1_at	3.06606	3.97368	3.97368	6.44523	6.48512	7.94239	5.26913	3.67114	6.53547	-2.86433	-5.08344	0.000799382	0.00252223	-0.690432	gb:BI443477 /DB_XREF=gi:15268184 /DB_XREF=dai92b10.x1 /CLONE=IMAGE:5047651 /TID=Xl.25662.1 /CNT=3 /FEA=EST /TIER=ConsEnd /STK=2 /UG=Xl.25662 /UG_TITLE=ESTs, Weakly similar to hypothetical protein FLJ12553 (Homo sapiens) (H.sapiens)
Xl.7449.1.S1_at	5.78921	5.54936	5.54936	8.47463	8.19141	8.59625	8.70467	5.62931	8.49174	-2.86243	-13.562	4.9511e-07	1.95373e-05	7.04388	gb:BG022877 /DB_XREF=gi:12478956 /DB_XREF=dab09c03.x1 /CLONE=IMAGE:4173701 /TID=Xl.7449.1 /CNT=24 /FEA=EST /TIER=ConsEnd /STK=1 /UG=Xl.7449 /UG_TITLE=ESTs, Moderately similar to adaptor-related protein complex 1, mu 1 subunit; clathrin assembly protein complex 1, medium chain; clathrin coat assembly protein AP47; golgi adaptor AP-1 47 kDa protein; HA1 47 kDa subunit; clathrin assembly protein com…
Xl.6064.1.S1_at	4.83142	6.66438	6.66438	9.00757	8.72459	9.031	8.8964	6.05339	8.91489	-2.8615	-6.5597	0.000137742	0.000710041	1.18306	gb:BJ093074 /DB_XREF=gi:17592481 /DB_XREF=BJ093074 /CLONE=XL141f13 /TID=Xl.6064.1 /CNT=5 /FEA=EST /TIER=ConsEnd /STK=0 /UG=Xl.6064 /UG_TITLE=ESTs, Weakly similar to HSPC134 protein (Homo sapiens) (H.sapiens)
Xl.8903.1.S1_a_at	8.18668	8.30701	8.30701	10.7352	11.0935	11.2991	11.3782	8.2669	11.1265	-2.85961	-12.8519	7.65545e-07	2.54849e-05	6.60679	gb:CD326035 /DB_XREF=gi:31090366 /DB_XREF=AGENCOURT_14145500 /CLONE=IMAGE:6949347 /TID=Xl.8903.1 /CNT=126 /FEA=FLmRNA /TIER=Stack /STK=10 /UG=Xl.8903 /UG_TITLE=Xenopus laevis, Similar to tubulin, beta, 2, clone MGC:53205 IMAGE:5543255, mRNA, complete cds /FL=gb:BC046853.1
Xl.9639.1.A1_at	4.45458	4.49793	4.49793	7.17464	6.5958	8.16932	7.41472	4.48348	7.33862	-2.85514	-8.2502	2.51498e-05	0.000238273	2.98858	gb:BM180373 /DB_XREF=gi:17404444 /DB_XREF=daj89f08.x1 /CLONE=IMAGE:5130015 /TID=Xl.9639.1 /CNT=3 /FEA=EST /TIER=ConsEnd /STK=2 /UG=Xl.9639 /UG_TITLE=ESTs
Xl.24279.2.S1_a_at	6.16401	5.82211	5.82211	7.7986	8.0021	9.84651	9.485	5.93608	8.78305	-2.84697	-5.60471	0.000415674	0.00154549	0.00591315	gb:BJ057297 /DB_XREF=gi:17470070 /DB_XREF=BJ057297 /CLONE=XL034k05 /TID=Xl.24279.2 /CNT=9 /FEA=EST /TIER=Stack /STK=7 /UG=Xl.24279 /UG_TITLE=Xenopus laevis clone S10-51-F12 mRNA sequence
Xl.4479.1.A1_at	3.23236	2.56974	2.56974	6.55846	5.40466	5.55117	5.03591	2.79061	5.63755	-2.84694	-7.61769	4.59228e-05	0.000352085	2.35103	gb:BJ053544 /DB_XREF=gi:17420885 /DB_XREF=BJ053544 /CLONE=XL039d22 /TID=Xl.4479.1 /CNT=6 /FEA=EST /TIER=ConsEnd /STK=5 /UG=Xl.4479 /UG_TITLE=ESTs, Weakly similar to hypothetical protein FLJ20548 (Homo sapiens) (H.sapiens)
Xl.13480.1.S1_at	4.78156	3.26707	3.26707	7.56077	5.85715	6.07632	6.96889	3.7719	6.61578	-2.84388	-5.50189	0.000471495	0.00169755	-0.12835	gb:BJ092093 /DB_XREF=gi:17591019 /DB_XREF=BJ092093 /CLONE=XL064a12 /TID=Xl.13480.1 /CNT=12 /FEA=EST /TIER=ConsEnd /STK=2 /UG=Xl.13480 /UG_TITLE=ESTs, Moderately similar to A56650 2-oxoglutarate carrier protein - human (H.sapiens)
Xl.15301.1.A1_at	4.55315	4.98644	4.98644	8.15349	7.64623	7.74776	7.19292	4.84201	7.6851	-2.84309	-10.55	3.71774e-06	6.93153e-05	4.99077	gb:BG554631 /DB_XREF=gi:13566411 /DB_XREF=de97d05.x3 /CLONE=IMAGE:3549728 /TID=Xl.15301.1 /CNT=2 /FEA=EST /TIER=ConsEnd /STK=1 /UG=Xl.15301 /UG_TITLE=ESTs
Xl.826.3.S1_x_at	2.46551	2.34679	2.34679	5.38469	6.29087	4.69473	4.54695	2.38637	5.22931	-2.84294	-7.0281	8.34323e-05	0.000513714	1.71674	gb:X14806.1 /DB_XREF=gi:64902 /TID=Xl.826.3 /CNT=1 /FEA=mRNA /TIER=ConsEnd /STK=0 /UG=Xl.826 /UG_TITLE=X.laevis c-myc mRNA, complete cds /DEF=Xenopus proto-oncogene c-myc I RNA.
Xl.24274.1.A1_at	6.23866	6.70637	6.70637	9.65495	9.31513	9.06445	9.53894	6.55047	9.39337	-2.8429	-12.0239	1.30959e-06	3.58524e-05	6.06283	gb:AY256464.1 /DB_XREF=gi:30039224 /GEN=Rae1Gle2 /TID=Xl.24274.1 /CNT=42 /FEA=FLmRNA /TIER=FL+Stack /STK=15 /UG=Xl.24274 /DEF=Xenopus laevis Rae1Gle2 (Rae1Gle2) mRNA, complete cds. /PROD=Rae1Gle2 /FL=gb:AY256464.1
Xl.151.1.S1_at	4.90998	5.61011	5.61011	8.27813	7.99923	8.38984	8.20643	5.37673	8.21841	-2.84168	-11.6094	1.73507e-06	4.33679e-05	5.77558	gb:BG038467 /DB_XREF=gi:12481052 /DB_XREF=dd95g10.x1 /CLONE=IMAGE:3432019 /TID=Xl.151.1 /CNT=41 /FEA=mRNA /TIER=ConsEnd /STK=1 /UG=Xl.151 /UG_TITLE=X.laevis mRNA for fascin
Xl.5778.1.S1_at	4.53245	3.28463	3.28463	7.00521	5.68987	7.04261	6.42389	3.70057	6.54039	-2.83982	-6.57612	0.000135284	0.000702733	1.20224	gb:BC046268.1 /DB_XREF=gi:28279448 /TID=Xl.5778.1 /CNT=10 /FEA=FLmRNA /TIER=FL /STK=5 /UG=Xl.5778 /DEF=Xenopus laevis, Similar to homocysteine-inducible, endoplasmic reticulum stress-inducible, ubiquitin-like domain member 1, clone MGC:53452 IMAGE:5572002, mRNA, complete cds. /PROD=Similar to homocysteine-inducible, endoplasmicreticulum stress-inducible, ubiquitin-like domain member1 /FL=gb:BC046…
Xl.24356.1.S1_at	2.70751	3.40286	3.40286	6.30289	6.87402	5.16897	5.69293	3.17108	6.0097	-2.83862	-6.94366	9.11573e-05	0.000540496	1.62254	gb:CA973348 /DB_XREF=gi:27506002 /DB_XREF=AGENCOURT_10764307 /CLONE=IMAGE:6325524 /TID=Xl.24356.1 /CNT=27 /FEA=EST /TIER=ConsEnd /STK=4 /UG=Xl.24356 /UG_TITLE=ESTs, Weakly similar to nucleoporin 88kD (Homo sapiens) (H.sapiens)
Xl.18852.1.S1_at	6.0213	5.73163	5.73163	8.46328	8.52124	9.26957	8.41039	5.82819	8.66612	-2.83793	-10.7612	3.17702e-06	6.26943e-05	5.15338	gb:BI446871 /DB_XREF=gi:15271578 /DB_XREF=daa89e03.x3 /CLONE=IMAGE:4084684 /TID=Xl.18852.1 /CNT=12 /FEA=EST /TIER=ConsEnd /STK=1 /UG=Xl.18852 /UG_TITLE=ESTs, Moderately similar to ODPA_HUMAN Pyruvate dehydrogenase E1 component alpha subunit, somatic form, mitochondrial precursor (PDHE1-A type I) (H.sapiens)
Xl.5236.2.S1_a_at	2.71064	3.26707	3.26707	5.86674	5.12304	6.71024	5.96352	3.0816	5.91589	-2.83429	-7.76576	3.97493e-05	0.000319916	2.50411	gb:BJ085796 /DB_XREF=gi:17581937 /DB_XREF=BJ085796 /CLONE=XL051b08 /TID=Xl.5236.2 /CNT=10 /FEA=EST /TIER=ConsEnd /STK=2 /UG=Xl.5236 /UG_TITLE=ESTs, Moderately similar to heterogeneous nuclear ribonucleoprotein H3, isoform a (Homo sapiens) (H.sapiens)
Xl.15710.1.A1_at	2.74415	2.6472	2.6472	4.09529	4.72133	7.13481	6.10356	2.67952	5.51375	-2.83423	-4.37598	0.0020664	0.00538012	-1.69825	gb:BJ059837 /DB_XREF=gi:17493177 /DB_XREF=BJ059837 /CLONE=XL064a17 /TID=Xl.15710.1 /CNT=3 /FEA=EST /TIER=ConsEnd /STK=0 /UG=Xl.15710 /UG_TITLE=ESTs, Moderately similar to hypothetical protein DKFZp434E2318 (Homo sapiens) (H.sapiens)
Xl.8316.1.S1_at	2.71064	4.55684	4.55684	6.7204	6.82154	6.88842	6.66682	3.94144	6.77429	-2.83285	-6.48986	0.000148757	0.000749005	1.1011	gb:BJ081244 /DB_XREF=gi:17575332 /DB_XREF=BJ081244 /CLONE=XL071b01 /TID=Xl.8316.1 /CNT=17 /FEA=EST /TIER=ConsEnd /STK=1 /UG=Xl.8316 /UG_TITLE=ESTs, Moderately similar to hypothetical protein FLJ10377 (Homo sapiens) (H.sapiens)
Xl.17530.1.A1_at	6.00164	5.20511	5.20511	7.73495	8.1786	10.3492	6.94918	5.47062	8.30298	-2.83236	-4.00793	0.00348617	0.00822655	-2.25016	gb:BQ400299 /DB_XREF=gi:21087986 /DB_XREF=NISC_mp08e07.x1 /CLONE=IMAGE:4968685 /TID=Xl.17530.1 /CNT=2 /FEA=EST /TIER=ConsEnd /STK=0 /UG=Xl.17530 /UG_TITLE=ESTs, Weakly similar to hypothetical protein FLJ21628 (Homo sapiens) (H.sapiens)
Xl.19310.1.S1_x_at	4.08872	5.5645	5.5645	8.89371	6.6977	8.00022	8.02337	5.07257	7.90375	-2.83118	-5.15666	0.000727557	0.00234983	-0.590262	gb:BG811344 /DB_XREF=gi:14182324 /DB_XREF=daf62a10.x1 /CLONE=IMAGE:4743066 /TID=Xl.19310.1 /CNT=13 /FEA=EST /TIER=ConsEnd /STK=0 /UG=Xl.19310 /UG_TITLE=ESTs
Xl.22827.1.A1_x_at	4.13066	4.08201	4.08201	6.48755	6.82864	6.95908	7.44179	4.09823	6.92926	-2.83104	-11.1713	2.35939e-06	5.15281e-05	5.46018	gb:CB560457 /DB_XREF=gi:29479987 /DB_XREF=AGENCOURT_13350304 /CLONE=IMAGE:6878178 /TID=Xl.22827.1 /CNT=3 /FEA=EST /TIER=ConsEnd /STK=3 /UG=Xl.22827 /UG_TITLE=ESTs
Xl.20900.1.S1_at	5.95148	5.66681	5.66681	8.54277	8.07062	8.50971	9.23386	5.7617	8.58924	-2.82754	-9.79693	6.66292e-06	0.000100162	4.38414	gb:CD326212 /DB_XREF=gi:31090543 /DB_XREF=AGENCOURT_14142328 /CLONE=IMAGE:6948473 /TID=Xl.20900.1 /CNT=111 /FEA=mRNA /TIER=Stack /STK=42 /UG=Xl.20900 /UG_TITLE=Xenopus laevis, Similar to CD63 antigen, clone IMAGE:5571764, mRNA, partial cds
Xl.15053.1.A1_at	6.12019	5.00058	5.00058	8.80526	8.57924	7.73027	7.69015	5.37378	8.20123	-2.82745	-7.1191	7.59053e-05	0.000482709	1.81729	gb:BJ046960 /DB_XREF=gi:17408646 /DB_XREF=BJ046960 /CLONE=XL015a21 /TID=Xl.15053.1 /CNT=2 /FEA=EST /TIER=ConsEnd /STK=2 /UG=Xl.15053 /UG_TITLE=ESTs
Xl.13320.1.A1_at	2.46551	2.45598	2.45598	6.52896	6.11949	2.17241	6.32116	2.45916	5.28551	-2.82635	-2.93285	0.0178115	0.0318539	-3.94515	gb:BJ043994 /DB_XREF=gi:17419847 /DB_XREF=BJ043994 /CLONE=XL011o05 /TID=Xl.13320.1 /CNT=4 /FEA=EST /TIER=ConsEnd /STK=2 /UG=Xl.13320 /UG_TITLE=ESTs, Weakly similar to ortholog of mouse radial spokehead-like 1 (Homo sapiens) (H.sapiens)
Xl.14706.1.A1_at	3.28245	3.04127	3.04127	6.03661	6.21505	6.12045	5.41786	3.12167	5.94749	-2.82583	-11.4089	1.9946e-06	4.73093e-05	5.63274	gb:BM179029 /DB_XREF=gi:17403100 /DB_XREF=dai13d05.x1 /CLONE=IMAGE:4959392 /TID=Xl.14706.1 /CNT=1 /FEA=EST /TIER=ConsEnd /STK=1 /UG=Xl.14706 /UG_TITLE=ESTs, Moderately similar to KPB1_HUMAN Phosphorylase B kinase alpha regulatory chain, skeletal muscle isoform (Phosphorylase kinase alpha M subunit) (H.sapiens)
Xl.19101.1.S1_at	3.47496	4.72133	4.72133	6.90243	7.19287	7.28864	7.12731	4.30587	7.12781	-2.82194	-8.55605	1.90448e-05	0.000199207	3.28211	gb:AW637678 /DB_XREF=gi:7394801 /DB_XREF=bl61c09.w1 /CLONE=PBX0061C09 /TID=Xl.19101.1 /CNT=8 /FEA=EST /TIER=ConsEnd /STK=2 /UG=Xl.19101 /UG_TITLE=ESTs
Xl.24758.1.S1_at	5.89383	6.42299	6.42299	9.47898	9.15635	8.76518	8.87233	6.24661	9.06821	-2.82161	-10.9992	2.67e-06	5.66109e-05	5.33282	gb:BF071993 /DB_XREF=gi:10848632 /DB_XREF=db49e11.x1 /CLONE=IMAGE:3301868 /TID=Xl.24758.1 /CNT=9 /FEA=EST /TIER=ConsEnd /STK=1 /UG=Xl.24758 /UG_TITLE=ESTs, Weakly similar to R01H10.6.p (Caenorhabditis elegans) (C.elegans)
Xl.15231.1.A1_at	3.88549	4.43732	4.43732	7.50527	7.22325	7.06987	6.49887	4.25338	7.07432	-2.82094	-9.79411	6.67799e-06	0.000100257	4.38179	gb:BJ097674 /DB_XREF=gi:17599157 /DB_XREF=BJ097674 /CLONE=XL142j03 /TID=Xl.15231.1 /CNT=3 /FEA=EST /TIER=ConsEnd /STK=1 /UG=Xl.15231 /UG_TITLE=ESTs, Weakly similar to hypothetical protein MGC15407 (Homo sapiens) (H.sapiens)
Xl.3190.1.S1_at	9.02927	9.19544	9.19544	12.0003	11.6722	12.0063	12.1625	9.14005	11.9603	-2.8203	-13.7857	4.3346e-07	1.78433e-05	7.17639	gb:BJ099000 /DB_XREF=gi:17601086 /DB_XREF=BJ099000 /CLONE=XL148m07 /TID=Xl.3190.1 /CNT=6 /FEA=EST /TIER=Stack /STK=6 /UG=Xl.3190 /UG_TITLE=ESTs, Moderately similar to A36670 cell division control protein CKS1 - human (H.sapiens)
Xl.13924.1.A1_at	4.18219	3.39066	3.39066	5.97796	5.91891	6.94584	7.04949	3.6545	6.47305	-2.81855	-7.61496	4.60463e-05	0.000352561	2.34818	gb:BJ077610 /DB_XREF=gi:17522526 /DB_XREF=BJ077610 /CLONE=XL061i12 /TID=Xl.13924.1 /CNT=4 /FEA=EST /TIER=ConsEnd /STK=3 /UG=Xl.13924 /UG_TITLE=ESTs, Weakly similar to ICEA_HUMAN Caspase-10 precursor (ICE-like apoptotic protease 4) (Apoptotic protease Mch-4) (FAS-associated death domain protein interleukin-1B-converting enzyme 2) (FLICE2) (H.sapiens)
Xl.26265.1.S1_at	3.86506	3.39066	3.39066	5.82421	5.95103	5.88074	7.78506	3.54879	6.36026	-2.81147	-5.87062	0.000302056	0.00123588	0.346211	gb:CD361284 /DB_XREF=gi:31132695 /DB_XREF=AGENCOURT_14238197 /CLONE=IMAGE:6957374 /TID=Xl.26265.1 /CNT=4 /FEA=EST /TIER=ConsEnd /STK=1 /UG=Xl.26265 /UG_TITLE=ESTs, Weakly similar to D1069.3.p (Caenorhabditis elegans) (C.elegans)
Xl.19018.1.S1_at	6.41888	6.15741	6.15741	9.41321	9.57034	8.57564	8.6625	6.24457	9.05542	-2.81085	-9.44536	8.8661e-06	0.000119797	4.08554	gb:BG021097 /DB_XREF=gi:12477260 /DB_XREF=df30g11.x1 /CLONE=IMAGE:3580220 /TID=Xl.19018.1 /CNT=2 /FEA=EST /TIER=ConsEnd /STK=2 /UG=Xl.19018 /UG_TITLE=ESTs, Weakly similar to L10K_HUMAN Leydig cell tumor 10 kDa protein homolog (HSPC023) (H.sapiens)
Xl.18093.1.A1_at	2.92159	3.26707	3.26707	5.94491	5.34091	5.77212	6.79306	3.15191	5.96275	-2.81084	-8.32466	2.34859e-05	0.000227799	3.0609	gb:BQ386710 /DB_XREF=gi:21074397 /DB_XREF=NISC_mn19g06.x1 /CLONE=IMAGE:5073994 /TID=Xl.18093.1 /CNT=4 /FEA=EST /TIER=ConsEnd /STK=1 /UG=Xl.18093 /UG_TITLE=ESTs, Moderately similar to T50626 hypothetical protein DKFZp762K1914.1 - human (fragment) (H.sapiens)
Xl.19645.1.A1_at	3.5988	3.92581	3.92581	6.92032	6.66747	6.69611	6.21952	3.81681	6.62585	-2.80905	-12.0299	1.30429e-06	3.58524e-05	6.06696	gb:BI444057 /DB_XREF=gi:15268764 /DB_XREF=dai94c08.x1 /CLONE=IMAGE:5048055 /TID=Xl.19645.1 /CNT=3 /FEA=EST /TIER=ConsEnd /STK=1 /UG=Xl.19645 /UG_TITLE=ESTs, Moderately similar to protein x 013 (Homo sapiens) (H.sapiens)
Xl.5329.1.S1_at	4.56887	2.71799	2.71799	6.23575	6.03942	6.06114	6.2382	3.33495	6.14362	-2.80867	-6.41487	0.000161672	0.000794523	1.0124	gb:BE575346 /DB_XREF=gi:9825195 /DB_XREF=dc66f11.x1 /CLONE=IMAGE:3402093 /TID=Xl.5329.1 /CNT=3 /FEA=EST /TIER=ConsEnd /STK=1 /UG=Xl.5329 /UG_TITLE=ESTs
Xl.5183.1.S1_at	4.56887	6.83514	6.83514	9.13386	8.42548	8.77848	9.20027	6.07972	8.88452	-2.80481	-5.16949	0.000715702	0.00232068	-0.572778	gb:BG016670 /DB_XREF=gi:12470147 /DB_XREF=df63f05.x1 /CLONE=IMAGE:3744129 /TID=Xl.5183.1 /CNT=21 /FEA=EST /TIER=ConsEnd /STK=2 /UG=Xl.5183 /UG_TITLE=ESTs
Xl.23764.1.A1_at	4.89096	5.3887	5.3887	8.0793	8.15796	7.70502	8.16534	5.22279	8.02691	-2.80412	-12.1789	1.18142e-06	3.4178e-05	6.16762	gb:BG161326 /DB_XREF=gi:12695245 /DB_XREF=dab68g04.x1 /CLONE=IMAGE:4202310 /TID=Xl.23764.1 /CNT=11 /FEA=EST /TIER=ConsEnd /STK=2 /UG=Xl.23764 /UG_TITLE=ESTs, Moderately similar to T17320 hypothetical protein DKFZp564J0863.1 - human (fragment) (H.sapiens)
Xl.22352.1.A1_at	5.89015	5.54998	5.54998	9.12429	8.62699	8.45559	7.66163	5.66337	8.46712	-2.80376	-8.32589	2.34594e-05	0.000227753	3.06209	gb:CA791322 /DB_XREF=gi:26038094 /DB_XREF=AGENCOURT_10304523 /CLONE=IMAGE:5161859 /TID=Xl.22352.1 /CNT=6 /FEA=EST /TIER=ConsEnd /STK=2 /UG=Xl.22352 /UG_TITLE=ESTs, Weakly similar to Y008_HUMAN Hypothetical protein KIAA0008 (H.sapiens)
Xl.6256.2.S1_x_at	3.78605	3.55872	3.55872	6.62793	6.70554	6.3654	6.04989	3.6345	6.43719	-2.80269	-12.2514	1.12629e-06	3.29878e-05	6.21618	gb:CB563809 /DB_XREF=gi:29483339 /DB_XREF=AGENCOURT_13321635 /CLONE=IMAGE:6876283 /TID=Xl.6256.2 /CNT=60 /FEA=EST /TIER=Stack /STK=9 /UG=Xl.6256 /UG_TITLE=Xenopus laevis, clone IMAGE:4683989, mRNA, partial cds
Xl.16106.1.A1_at	2.59167	3.39066	3.39066	5.26962	4.44875	7.48549	6.50338	3.12433	5.92681	-2.80248	-4.2636	0.00241915	0.00611307	-1.86486	gb:BG161783 /DB_XREF=gi:12695702 /DB_XREF=de42g05.x1 /CLONE=IMAGE:3474609 /TID=Xl.16106.1 /CNT=4 /FEA=EST /TIER=ConsEnd /STK=1 /UG=Xl.16106 /UG_TITLE=ESTs, Weakly similar to hypothetical protein FLJ20287 (Homo sapiens) (H.sapiens)
Xl.10258.1.A1_at	4.58756	4.74117	4.74117	7.81253	7.84445	6.85722	7.44957	4.68997	7.49094	-2.80098	-10.1315	5.11781e-06	8.61848e-05	4.65902	gb:BF231657 /DB_XREF=gi:11173500 /DB_XREF=de90a12.x1 /CLONE=IMAGE:3548831 /TID=Xl.10258.1 /CNT=1 /FEA=EST /TIER=ConsEnd /STK=1 /UG=Xl.10258 /UG_TITLE=ESTs
Xl.147.1.S1_at	4.05551	5.21678	5.21678	7.72203	8.06698	7.91857	6.81207	4.82969	7.62991	-2.80022	-7.01341	8.47225e-05	0.000518323	1.70042	gb:BQ386769 /DB_XREF=gi:21074456 /DB_XREF=NISC_mn20b02.x1 /CLONE=IMAGE:5073747 /TID=Xl.147.1 /CNT=33 /FEA=mRNA /TIER=ConsEnd /STK=0 /UG=Xl.147 /UG_TITLE=X.laevis mRNA for Ran binding protein 1
Xl.1199.1.S1_at	5.89015	2.88419	2.88419	6.87164	6.56969	6.81207	6.4905	3.88618	6.68598	-2.7998	-4.15413	0.00282554	0.00693554	-2.02878	gb:X69662.1 /DB_XREF=gi:64728 /TID=Xl.1199.1 /CNT=15 /FEA=mRNA /TIER=ConsEnd /STK=0 /UG=Xl.1199 /DEF=X.laevis mRNA for glutathione synthetase, large subunit. /PROD=glutathione synthase
Xl.10154.1.S1_at	6.62663	6.55426	6.55426	9.4776	8.7572	9.75031	9.5092	6.57838	9.37358	-2.79519	-10.5629	3.68187e-06	6.90952e-05	5.00082	gb:BF232479 /DB_XREF=gi:11175163 /DB_XREF=de06d11.x1 /CLONE=IMAGE:3437229 /TID=Xl.10154.1 /CNT=2 /FEA=EST /TIER=ConsEnd /STK=1 /UG=Xl.10154 /UG_TITLE=ESTs
Xl.16864.1.S1_at	6.1475	4.55684	4.55684	7.73708	7.8819	8.02961	7.87314	5.08706	7.88043	-2.79337	-7.18702	7.07745e-05	0.000463946	1.8917	gb:BJ054829 /DB_XREF=gi:17468137 /DB_XREF=BJ054829 /CLONE=XL046i08 /TID=Xl.16864.1 /CNT=6 /FEA=EST /TIER=ConsEnd /STK=1 /UG=Xl.16864 /UG_TITLE=ESTs, Weakly similar to hypothetical protein FLJ20624 (Homo sapiens) (H.sapiens)
Xl.23926.1.A1_at	4.71346	5.6256	5.6256	8.11646	8.4952	8.29288	7.55146	5.32155	8.114	-2.79245	-8.65544	1.74296e-05	0.000188493	3.37552	gb:BJ091731 /DB_XREF=gi:17590514 /DB_XREF=BJ091731 /CLONE=XL101c21 /TID=Xl.23926.1 /CNT=11 /FEA=EST /TIER=Stack /STK=8 /UG=Xl.23926 /UG_TITLE=ESTs, Highly similar to T9S4_HUMAN Transmembrane 9 superfamily protein member 4 (H.sapiens)
Xl.7587.2.S1_at	4.92931	5.49721	5.49721	7.85976	8.41824	8.38975	7.72436	5.30791	8.09803	-2.79012	-10.32	4.42525e-06	7.73576e-05	4.81012	gb:CA791192 /DB_XREF=gi:26037856 /DB_XREF=AGENCOURT_10305803 /CLONE=IMAGE:5079691 /TID=Xl.7587.2 /CNT=32 /FEA=EST /TIER=Stack /STK=17 /UG=Xl.7587 /UG_TITLE=Xenopus laevis heat shock protein gp96 mRNA, complete cds
Xl.8312.1.S1_at	3.75795	4.6692	4.6692	7.41481	6.49311	7.38102	7.33299	4.36545	7.15548	-2.79003	-8.39189	2.20877e-05	0.000220295	3.12571	gb:AW147964 /DB_XREF=gi:6195860 /DB_XREF=da01c04.x1 /CLONE=XENOPUS_SOURCE_ID:xlnoc001b07 /TID=Xl.8312.1 /CNT=8 /FEA=EST /TIER=ConsEnd /STK=0 /UG=Xl.8312 /UG_TITLE=ESTs, Moderately similar to UK14_HUMAN 14.5 kDa translational inhibitor protein (p14.5) (UK114 antigen homolog) (H.sapiens)
Xl.3706.1.A1_at	4.98044	5.69029	5.69029	9.43238	8.1034	6.88442	8.544	5.45367	8.24105	-2.78738	-5.19954	0.00068877	0.00225886	-0.531956	gb:BF428127 /DB_XREF=gi:11439819 /DB_XREF=daa02h03.x1 /CLONE=IMAGE:4055261 /TID=Xl.3706.1 /CNT=2 /FEA=EST /TIER=ConsEnd /STK=1 /UG=Xl.3706 /UG_TITLE=ESTs, Weakly similar to hypothetical protein PP591 (Homo sapiens) (H.sapiens)
Xl.23026.1.S1_s_at	3.00118	3.7754	3.7754	6.17742	5.32034	6.59686	7.11859	3.51733	6.3033	-2.78597	-6.58771	0.00013358	0.000697347	1.21574	gb:BC046716.1 /DB_XREF=gi:28302310 /TID=Xl.23026.1 /CNT=47 /FEA=FLmRNA /TIER=FL+Stack /STK=6 /UG=Xl.23026 /DEF=Xenopus laevis, clone MGC:53714 IMAGE:4889679, mRNA, complete cds. /PROD=Unknown (protein for MGC:53714) /FL=gb:BC046716.1
Xl.12848.1.S1_at	3.28245	4.04159	4.04159	5.7619	5.9024	6.8373	7.78197	3.78855	6.57089	-2.78235	-5.6762	0.000381126	0.00145483	0.0983834	gb:BJ057294 /DB_XREF=gi:17470067 /DB_XREF=BJ057294 /CLONE=XL034k02 /TID=Xl.12848.1 /CNT=39 /FEA=EST /TIER=ConsEnd /STK=5 /UG=Xl.12848 /UG_TITLE=ESTs, Moderately similar to alpha 3 type IV collagen binding protein, isoform 2; goodpasture antigen-binding protein (Homo sapiens) (H.sapiens)
Xl.23773.1.A1_at	6.60118	5.38981	5.38981	8.87935	8.02888	9.14354	8.24928	5.7936	8.57526	-2.78166	-7.04702	8.18023e-05	0.000505923	1.73773	gb:CD360920 /DB_XREF=gi:31132331 /DB_XREF=AGENCOURT_14239399 /CLONE=IMAGE:6957451 /TID=Xl.23773.1 /CNT=13 /FEA=EST /TIER=Stack /STK=6 /UG=Xl.23773 /UG_TITLE=ESTs, Moderately similar to T4S8_HUMAN Transmembrane 4 superfamily, member 8 (Tetraspanin 3) (Tspan-3) (Tetraspanin TM4-A) (H.sapiens)
Xl.24850.1.A1_s_at	2.95372	2.39446	2.39446	6.55556	3.00837	7.50718	4.36719	2.58088	5.35957	-2.7787	-2.90962	0.0184759	0.0329241	-3.98254	gb:AF185579.1 /DB_XREF=gi:6090940 /TID=Xl.24850.1 /CNT=7 /FEA=FLmRNA /TIER=FL /STK=5 /UG=Xl.24850 /DEF=Xenopus laevis haplotype g MHC class I antigen mRNA, complete cds. /PROD=MHC class I antigen /FL=gb:AF185579.1
Xl.11800.1.A1_at	3.86506	5.6256	5.6256	7.85251	7.7144	7.88627	7.80998	5.03875	7.81579	-2.77703	-6.63023	0.000127521	0.000673991	1.26518	gb:BG486845 /DB_XREF=gi:13434422 /DB_XREF=dc98e12.x1 /CLONE=IMAGE:3405047 /TID=Xl.11800.1 /CNT=8 /FEA=EST /TIER=ConsEnd /STK=1 /UG=Xl.11800 /UG_TITLE=ESTs, Weakly similar to hypothetical protein FLJ20003 (Homo sapiens) (H.sapiens)
Xl.6901.1.A1_at	5.57333	4.36372	4.36372	8.09324	7.78853	7.69314	6.5995	4.76692	7.5436	-2.77668	-6.42048	0.000160663	0.000791599	1.01907	gb:AW766443 /DB_XREF=gi:7698423 /DB_XREF=da62f11.x1 /CLONE=IMAGE:3199533 /TID=Xl.6901.1 /CNT=4 /FEA=EST /TIER=ConsEnd /STK=2 /UG=Xl.6901 /UG_TITLE=ESTs, Weakly similar to S66665 nuclear protein Hep27 - human (H.sapiens)
Xl.13659.1.S1_at	4.05551	3.26707	3.26707	5.96545	6.69782	6.93073	5.6306	3.52989	6.30615	-2.77626	-7.4919	5.20047e-05	0.000382817	2.21905	gb:AW639411 /DB_XREF=gi:7396598 /DB_XREF=bl82e08.w1 /CLONE=PBX0082E08 /TID=Xl.13659.1 /CNT=5 /FEA=EST /TIER=ConsEnd /STK=0 /UG=Xl.13659 /UG_TITLE=ESTs, Moderately similar to hypothetical protein FLJ11183 (Homo sapiens) (H.sapiens)
Xl.9326.1.A1_at	5.59193	5.01169	5.01169	7.43735	8.77367	6.99159	8.71706	5.2051	7.97992	-2.77481	-5.97255	0.000267919	0.00113544	0.474048	gb:BM172582 /DB_XREF=gi:17312145 /DB_XREF=imageqc_5_2001sna478bdff41.x1 /CLONE=IMAGE:4969923 /TID=Xl.9326.1 /CNT=2 /FEA=EST /TIER=ConsEnd /STK=2 /UG=Xl.9326 /UG_TITLE=ESTs
Xl.24954.2.A1_a_at	5.71324	5.70647	5.70647	8.80862	8.62312	8.44904	8.05175	5.70873	8.48313	-2.77441	-12.0111	1.32082e-06	3.58524e-05	6.05413	gb:BJ087936 /DB_XREF=gi:17584989 /DB_XREF=BJ087936 /CLONE=XL091e17 /TID=Xl.24954.2 /CNT=6 /FEA=EST /TIER=ConsEnd /STK=1 /UG=Xl.24954 /UG_TITLE=ESTs, Weakly similar to A56449 protoporphyrinogen oxidase (EC 1.3.3.4) - human (H.sapiens)
Xl.2129.1.S1_at	5.585	5.3579	5.3579	8.38723	7.93616	8.3038	8.204	5.4336	8.2078	-2.7742	-13.5208	5.07483e-07	1.97131e-05	7.01924	gb:BG038823 /DB_XREF=gi:12481408 /DB_XREF=dg26c05.x1 /CLONE=IMAGE:3749769 /TID=Xl.2129.1 /CNT=25 /FEA=EST /TIER=ConsEnd /STK=3 /UG=Xl.2129 /UG_TITLE=ESTs, Moderately similar to AOP2_HUMAN Antioxidant protein 2 (1-Cys peroxiredoxin) (1-Cys PRX) (Acidic calcium-independent phospholipase A2) (aiPLA2) (Non-selenium glutathione peroxidase) (NSGPx) (24 kDa protein) (Liver 2D page spot 40) (red blood ce…
Xl.15654.1.A1_at	3.39777	2.79397	2.79397	5.16164	6.05643	6.07424	5.77892	2.99523	5.76781	-2.77257	-9.44824	8.84503e-06	0.000119653	4.08804	gb:BJ080628 /DB_XREF=gi:17574433 /DB_XREF=BJ080628 /CLONE=XL068j09 /TID=Xl.15654.1 /CNT=3 /FEA=EST /TIER=ConsEnd /STK=2 /UG=Xl.15654 /UG_TITLE=ESTs
Xl.17634.1.A1_at	5.54806	5.6604	5.6604	7.97456	8.41139	8.81017	8.36763	5.62296	8.39094	-2.76798	-11.6444	1.69384e-06	4.29329e-05	5.80019	gb:BQ386663 /DB_XREF=gi:21074350 /DB_XREF=NISC_mn19e03.x1 /CLONE=IMAGE:5073892 /TID=Xl.17634.1 /CNT=4 /FEA=EST /TIER=ConsEnd /STK=3 /UG=Xl.17634 /UG_TITLE=ESTs, Moderately similar to leucylcystinyl aminopeptidase; leucylcystinyl aminopeptidase (oxytocinase) (Homo sapiens) (H.sapiens)
Xl.13041.1.A1_at	3.47766	2.34679	2.34679	5.46766	5.62769	5.75057	5.10842	2.72375	5.48859	-2.76484	-8.46646	2.06434e-05	0.00021131	3.19709	gb:BJ047215 /DB_XREF=gi:17372741 /DB_XREF=BJ047215 /CLONE=XL015n22 /TID=Xl.13041.1 /CNT=2 /FEA=EST /TIER=ConsEnd /STK=1 /UG=Xl.13041 /UG_TITLE=ESTs, Moderately similar to secretory carrier membrane protein 5 (Mus musculus) (M.musculus)
Xl.6679.1.S2_at	6.00164	6.18023	6.18023	8.84085	8.9292	8.79458	8.97284	6.1207	8.88437	-2.76366	-14.8546	2.3576e-07	1.26245e-05	7.77764	gb:BM262162 /DB_XREF=gi:17925202 /DB_XREF=dag41f02.x3 /CLONE=IMAGE:4784018 /TID=Xl.6679.1 /CNT=32 /FEA=FLmRNA /TIER=ConsEnd /STK=0 /UG=Xl.6679 /UG_TITLE=Xenopus laevis protein phosphatase 1-gamma 1 mRNA, complete cds /FL=gb:L17039.1
Xl.24736.1.S1_at	6.71764	6.22527	6.22527	9.1605	8.77991	9.56791	9.09745	6.3894	9.15144	-2.76205	-10.8659	2.94195e-06	6.02286e-05	5.23278	gb:BQ109743 /DB_XREF=gi:20159397 /DB_XREF=imageqc_7_2001snn437bdff41.x1 /CLONE=IMAGE:5155385 /TID=Xl.24736.1 /CNT=32 /FEA=EST /TIER=Stack /STK=6 /UG=Xl.24736 /UG_TITLE=ESTs, Moderately similar to hypothetical protein MGC2594 (Homo sapiens) (H.sapiens)
Xl.15478.1.S1_at	6.77408	5.42872	5.42872	9.185	8.8532	7.95908	8.54543	5.87717	8.63568	-2.75851	-6.66683	0.000122548	0.000655749	1.30755	gb:BJ057098 /DB_XREF=gi:17469840 /DB_XREF=BJ057098 /CLONE=XL034a06 /TID=Xl.15478.1 /CNT=26 /FEA=EST /TIER=ConsEnd /STK=4 /UG=Xl.15478 /UG_TITLE=ESTs, Moderately similar to stromal cell-derived factor 2 precursor (Homo sapiens) (H.sapiens)
Xl.16369.1.A1_at	3.0343	3.28078	3.28078	5.17891	5.48693	6.87203	6.28198	3.19862	5.95496	-2.75634	-6.96551	8.90854e-05	0.000532064	1.647	gb:BJ049073 /DB_XREF=gi:17373241 /DB_XREF=BJ049073 /CLONE=XL022p15 /TID=Xl.16369.1 /CNT=2 /FEA=EST /TIER=ConsEnd /STK=1 /UG=Xl.16369 /UG_TITLE=ESTs
Xl.22860.1.A1_at	2.95779	4.39944	4.39944	6.61262	6.36341	6.95663	6.76799	3.91889	6.67516	-2.75627	-7.35686	5.95388e-05	0.000417208	2.07539	gb:BJ088831 /DB_XREF=gi:17586271 /DB_XREF=BJ088831 /CLONE=XL095e03 /TID=Xl.22860.1 /CNT=2 /FEA=EST /TIER=ConsEnd /STK=1 /UG=Xl.22860 /UG_TITLE=ESTs, Highly similar to A41311 transcription factor ITF-2 - human (H.sapiens)
Xl.15596.1.A1_at	2.86821	3.18755	3.18755	6.51652	6.49077	5.90274	4.4386	3.0811	5.83716	-2.75605	-5.71032	0.000365757	0.00141303	0.14225	gb:BM191264 /DB_XREF=gi:17527227 /DB_XREF=dae16e07.x3 /CLONE=IMAGE:4674157 /TID=Xl.15596.1 /CNT=3 /FEA=EST /TIER=ConsEnd /STK=1 /UG=Xl.15596 /UG_TITLE=ESTs
Xl.1168.1.S1_at	6.5755	5.00048	5.00048	8.15674	7.91028	8.19332	8.86014	5.52548	8.28012	-2.75463	-6.49209	0.000148391	0.000748141	1.10373	gb:BG160856 /DB_XREF=gi:12694775 /DB_XREF=de35f12.x1 /CLONE=IMAGE:3473830 /TID=Xl.1168.1 /CNT=59 /FEA=mRNA /TIER=Stack /STK=25 /UG=Xl.1168 /UG_TITLE=X.laevis mRNA for elongation factor 1 beta
Xl.15110.1.A1_at	5.21276	4.90241	4.90241	8.06667	7.34778	7.08468	8.5419	5.00586	7.76026	-2.75439	-7.69794	4.2455e-05	0.000333706	2.4343	gb:BG017356 /DB_XREF=gi:12471505 /DB_XREF=de63g02.x1 /CLONE=IMAGE:3516482 /TID=Xl.15110.1 /CNT=5 /FEA=EST /TIER=ConsEnd /STK=2 /UG=Xl.15110 /UG_TITLE=ESTs, Moderately similar to formiminotransferase cyclodeaminase; human formiminotransferase cyclodeaminase (Homo sapiens) (H.sapiens)
Xl.7463.1.S1_at	3.02587	2.80949	2.80949	6.30134	5.42047	5.28054	5.54115	2.88162	5.63588	-2.75426	-9.92561	6.01453e-06	9.41645e-05	4.49092	gb:BJ048790 /DB_XREF=gi:17409206 /DB_XREF=BJ048790 /CLONE=XL022a02 /TID=Xl.7463.1 /CNT=24 /FEA=EST /TIER=Stack /STK=7 /UG=Xl.7463 /UG_TITLE=ESTs, Weakly similar to expressed protein (Arabidopsis thaliana) (A.thaliana)
Xl.21734.1.A1_at	4.05551	4.78156	4.78156	7.49603	6.055	8.22356	7.38907	4.53955	7.29091	-2.75137	-5.80157	0.000327873	0.00130978	0.258792	gb:BJ077150 /DB_XREF=gi:17522066 /DB_XREF=BJ077150 /CLONE=XL060a10 /TID=Xl.21734.1 /CNT=3 /FEA=EST /TIER=ConsEnd /STK=1 /UG=Xl.21734 /UG_TITLE=ESTs, Moderately similar to hypothetical protein FLJ20274 (Homo sapiens) (H.sapiens)
Xl.14000.1.S1_at	5.89015	5.47275	5.47275	8.46315	8.30518	8.77062	7.91319	5.61188	8.36304	-2.75115	-10.6986	3.32749e-06	6.45543e-05	5.10555	gb:AW640628 /DB_XREF=gi:7397861 /DB_XREF=bl97b12.w1 /CLONE=PBX0097B12 /TID=Xl.14000.1 /CNT=6 /FEA=EST /TIER=ConsEnd /STK=0 /UG=Xl.14000 /UG_TITLE=ESTs, Weakly similar to T45119 FIM protein (imported) - human (H.sapiens)
Xl.1205.1.S1_at	5.0365	5.08515	5.08515	8.87232	7.42927	8.00613	6.96889	5.06893	7.81915	-2.75022	-6.64816	0.000125058	0.000664948	1.28595	gb:BJ084360 /DB_XREF=gi:17579871 /DB_XREF=BJ084360 /CLONE=XL088p07 /TID=Xl.1205.1 /CNT=23 /FEA=mRNA /TIER=ConsEnd /STK=4 /UG=Xl.1205 /UG_TITLE=Xenopus laevis histone protein (H5) mRNA
Xl.1924.1.A1_at	3.28245	2.59347	2.59347	4.86909	5.10426	6.22699	6.0908	2.82313	5.57278	-2.74965	-7.07803	7.92053e-05	0.000495195	1.77204	gb:BG439185 /DB_XREF=gi:13348835 /DB_XREF=dab23c07.x1 /CLONE=IMAGE:4175221 /TID=Xl.1924.1 /CNT=4 /FEA=EST /TIER=ConsEnd /STK=1 /UG=Xl.1924 /UG_TITLE=ESTs, Moderately similar to T13078 KIAA0992 protein - human (fragment) (H.sapiens)
Xl.290.1.S1_a_at	5.59931	4.55684	4.55684	7.80805	8.12866	7.61561	7.05833	4.90433	7.65266	-2.74833	-7.82083	3.76916e-05	0.000310612	2.56044	gb:BG163172 /DB_XREF=gi:12697091 /DB_XREF=de40b02.y1 /CLONE=IMAGE:3474003 /TID=Xl.290.1 /CNT=42 /FEA=mRNA /TIER=ConsEnd /STK=0 /UG=Xl.290 /UG_TITLE=Xenopus laevis 14S cohesin SMC3 subunit mRNA, partial cds
Xl.6847.1.S2_at	5.40309	4.04159	4.04159	7.74882	7.57327	6.116	7.52899	4.49543	7.24177	-2.74634	-5.66041	0.000388477	0.00147298	0.0780223	gb:BC045073.1 /DB_XREF=gi:27924237 /TID=Xl.6847.1 /CNT=40 /FEA=FLmRNA /TIER=Stack /STK=9 /UG=Xl.6847 /UG_TITLE=Xenopus laevis survival motor neuron mRNA, complete cds /DEF=Xenopus laevis, clone IMAGE:5542088, mRNA, partial cds. /FL=gb:AY048668.1
Xl.23458.1.S1_at	5.03687	5.05388	5.05388	7.16742	6.83784	8.31549	8.84996	5.04821	7.79268	-2.74447	-5.88381	0.000297383	0.00122155	0.362832	gb:BJ081081 /DB_XREF=gi:17575101 /DB_XREF=BJ081081 /CLONE=XL070f16 /TID=Xl.23458.1 /CNT=3 /FEA=EST /TIER=ConsEnd /STK=1 /UG=Xl.23458 /UG_TITLE=ESTs, Weakly similar to S24C_HUMAN Protein transport protein Sec24C (SEC24-related protein C) (H.sapiens)
Xl.16440.1.A1_at	3.00837	5.00048	5.00048	6.34783	6.68447	7.3715	7.90942	4.33644	7.07831	-2.74187	-4.88301	0.00103849	0.0030891	-0.968651	gb:BQ735459 /DB_XREF=gi:21874356 /DB_XREF=AGENCOURT_8149988 /CLONE=IMAGE:5571611 /TID=Xl.16440.1 /CNT=6 /FEA=EST /TIER=ConsEnd /STK=0 /UG=Xl.16440 /UG_TITLE=ESTs, Moderately similar to IF3X_HUMAN Putative eukaryotic translation initiation factor 3 subunit (eIF-3) (H.sapiens)
Xl.23765.1.S1_at	5.56115	6.609	6.609	9.03883	9.40628	8.23837	9.3102	6.25971	8.99842	-2.7387	-7.30933	6.24707e-05	0.000429369	2.02433	gb:BF615367 /DB_XREF=gi:11788896 /DB_XREF=dd83f02.x1 /CLONE=IMAGE:3430803 /TID=Xl.23765.1 /CNT=13 /FEA=EST /TIER=ConsEnd /STK=1 /UG=Xl.23765 /UG_TITLE=ESTs, Weakly similar to x 009 protein (Homo sapiens) (H.sapiens)
Xl.22905.2.A1_at	6.1475	5.7562	5.7562	8.04545	8.93552	8.90102	8.61925	5.88663	8.62531	-2.73868	-10.075	5.34805e-06	8.80008e-05	4.61324	gb:BJ076711 /DB_XREF=gi:17521627 /DB_XREF=BJ076711 /CLONE=XL058i07 /TID=Xl.22905.2 /CNT=6 /FEA=EST /TIER=ConsEnd /STK=1 /UG=Xl.22905 /UG_TITLE=ESTs, Moderately similar to STAU_HUMAN Double-stranded RNA-binding protein Staufen homolog (H.sapiens)
Xl.15374.1.A1_at	4.67809	4.44402	4.44402	7.74874	5.96335	7.04497	8.27957	4.52204	7.25916	-2.73711	-5.56858	0.000434421	0.00159761	-0.041095	gb:BJ077463 /DB_XREF=gi:17522379 /DB_XREF=BJ077463 /CLONE=XL061b09 /TID=Xl.15374.1 /CNT=3 /FEA=EST /TIER=ConsEnd /STK=2 /UG=Xl.15374 /UG_TITLE=ESTs, Weakly similar to dual specificity phosphatase 5; VH1-like phosphatase 3; protein tyrosine phosphatase; serinethreonine specific protein phosphatase (Homo sapiens) (H.sapiens)
Xl.5162.1.A1_at	4.05551	2.7814	2.7814	5.40065	3.67353	7.59134	7.10682	3.2061	5.94309	-2.73698	-3.13402	0.0129955	0.0245582	-3.6218	gb:BG233855 /DB_XREF=gi:12747702 /DB_XREF=daa29d06.x1 /CLONE=IMAGE:4057762 /TID=Xl.5162.1 /CNT=15 /FEA=EST /TIER=Stack /STK=12 /UG=Xl.5162 /UG_TITLE=ESTs, Weakly similar to A57136 class I histocompatibility antigen related protein MR1 precursor - human (H.sapiens)
Xl.13914.1.A1_at	3.38302	3.45799	3.45799	6.1251	6.1251	6.06441	6.36463	3.433	6.16981	-2.73681	-14.4848	2.89676e-07	1.44649e-05	7.57537	gb:BJ090722 /DB_XREF=gi:17589053 /DB_XREF=BJ090722 /CLONE=XL109o02 /TID=Xl.13914.1 /CNT=4 /FEA=EST /TIER=ConsEnd /STK=3 /UG=Xl.13914 /UG_TITLE=ESTs
Xl.3931.1.A1_at	6.00164	4.90241	4.90241	8.43192	8.15276	9.23196	6.19349	5.26882	8.00253	-2.73371	-4.16146	0.00279617	0.00688255	-2.01776	gb:BI443609 /DB_XREF=gi:15268316 /DB_XREF=dag57d11.x1 /CLONE=IMAGE:4785476 /TID=Xl.3931.1 /CNT=6 /FEA=EST /TIER=ConsEnd /STK=2 /UG=Xl.3931 /UG_TITLE=ESTs, Moderately similar to Y202_HUMAN Septin-like protein KIAA0202 (H.sapiens)
Xl.12786.1.A1_at	5.16792	5.20511	5.20511	7.51418	9.02429	7.98214	7.18198	5.19271	7.92565	-2.73294	-6.72557	0.000115006	0.000629873	1.37518	gb:BJ081578 /DB_XREF=gi:17575823 /DB_XREF=BJ081578 /CLONE=XL076a16 /TID=Xl.12786.1 /CNT=5 /FEA=EST /TIER=ConsEnd /STK=1 /UG=Xl.12786 /UG_TITLE=ESTs, Moderately similar to PX0082 laminin, M chain - human (fragment) (H.sapiens)
Xl.26317.1.A1_at	3.85687	3.52305	3.52305	6.38167	6.38043	6.25808	6.44635	3.63433	6.36663	-2.7323	-13.9824	3.86266e-07	1.64848e-05	7.29092	gb:AW767841 /DB_XREF=gi:7699852 /DB_XREF=da80g08.x1 /CLONE=IMAGE:3201278 /TID=Xl.26317.1 /CNT=2 /FEA=EST /TIER=ConsEnd /STK=1 /UG=Xl.26317 /UG_TITLE=ESTs
Xl.3536.1.S1_x_at	8.93156	8.6071	8.6071	11.5143	11.6945	11.1679	11.4124	8.71525	11.4473	-2.73204	-12.6539	8.67882e-07	2.75349e-05	6.48019	gb:BJ051780 /DB_XREF=gi:17498248 /DB_XREF=BJ051780 /CLONE=XL036m09 /TID=Xl.3536.1 /CNT=32 /FEA=EST /TIER=Stack /STK=12 /UG=Xl.3536 /UG_TITLE=ESTs, Highly similar to JC1235 transcription factor BTF3a - human (H.sapiens)
Xl.13333.1.A1_s_at	5.691	5.45618	5.45618	8.53807	8.70282	7.84926	7.97465	5.53445	8.2662	-2.73175	-10.2948	4.51163e-06	7.83905e-05	4.79005	gb:BJ092279 /DB_XREF=gi:17591299 /DB_XREF=BJ092279 /CLONE=XL064l13 /TID=Xl.13333.1 /CNT=2 /FEA=EST /TIER=ConsEnd /STK=2 /UG=Xl.13333 /UG_TITLE=ESTs
Xl.16382.1.A1_at	7.58029	7.5161	7.5161	10.3524	10.4014	9.28981	11.0295	7.53749	10.2683	-2.73078	-7.30704	6.26161e-05	0.000429854	2.02186	gb:BJ043695 /DB_XREF=gi:17417981 /DB_XREF=BJ043695 /CLONE=XL010n07 /TID=Xl.16382.1 /CNT=4 /FEA=EST /TIER=ConsEnd /STK=4 /UG=Xl.16382 /UG_TITLE=ESTs, Moderately similar to G protein pathway suppressor 2 (Homo sapiens) (H.sapiens)
Xl.4180.1.A1_at	4.05551	6.07208	6.07208	8.65477	8.36704	9.25339	6.23054	5.39989	8.12644	-2.72654	-3.58801	0.00648108	0.0137155	-2.90023	gb:BF047455 /DB_XREF=gi:10765958 /DB_XREF=dc87f08.x1 /CLONE=IMAGE:3404103 /TID=Xl.4180.1 /CNT=9 /FEA=EST /TIER=ConsEnd /STK=0 /UG=Xl.4180 /UG_TITLE=ESTs, Weakly similar to putative zinc finger protein (Homo sapiens) (H.sapiens)
Xl.5255.1.A1_at	4.56022	3.94819	3.94819	7.65149	6.83279	6.01189	7.01483	4.1522	6.87775	-2.72555	-7.19676	7.00705e-05	0.000460126	1.90233	gb:BE490990 /DB_XREF=gi:9610523 /DB_XREF=db41a10.x1 /CLONE=IMAGE:3301050 /TID=Xl.5255.1 /CNT=3 /FEA=EST /TIER=ConsEnd /STK=2 /UG=Xl.5255 /UG_TITLE=ESTs, Weakly similar to M142.5.p (Caenorhabditis elegans) (C.elegans)
Xl.24551.1.A1_at	3.00118	3.26707	3.26707	5.97028	6.42628	6.35526	4.84932	3.17844	5.90029	-2.72184	-7.15044	7.34885e-05	0.000474204	1.8517	gb:CB563152 /DB_XREF=gi:29482682 /DB_XREF=AGENCOURT_13329164 /CLONE=IMAGE:6874624 /TID=Xl.24551.1 /CNT=3 /FEA=EST /TIER=ConsEnd /STK=1 /UG=Xl.24551 /UG_TITLE=ESTs
Xl.24533.1.S1_at	6.65705	7.53389	7.53389	9.95769	10.2948	9.3772	10.2209	7.24161	9.96263	-2.72103	-8.47943	2.04032e-05	0.000209598	3.20944	gb:BJ053285 /DB_XREF=gi:17498881 /DB_XREF=BJ053285 /CLONE=XL038e24 /TID=Xl.24533.1 /CNT=5 /FEA=EST /TIER=ConsEnd /STK=1 /UG=Xl.24533 /UG_TITLE=ESTs, Highly similar to DEAD-box protein abstrakt (Homo sapiens) (H.sapiens)
Xl.25278.1.S1_at	4.86756	4.95838	4.95838	7.77899	7.43377	7.58093	7.79719	4.92811	7.64772	-2.71961	-13.8866	4.08493e-07	1.71224e-05	7.23537	gb:BF613874 /DB_XREF=gi:11785934 /DB_XREF=dd85c08.x1 /CLONE=IMAGE:3431031 /TID=Xl.25278.1 /CNT=27 /FEA=EST /TIER=Stack /STK=8 /UG=Xl.25278 /UG_TITLE=ESTs, Moderately similar to A55314 glycine--tRNA ligase (EC 6.1.1.14) precursor (validated) - human (H.sapiens)
Xl.25731.1.S1_at	5.24879	5.54998	5.54998	9.01157	8.07372	7.74901	7.84114	5.44958	8.16886	-2.71928	-8.38731	2.21799e-05	0.000220742	3.12132	gb:BM262253 /DB_XREF=gi:17925293 /DB_XREF=dag42h11.x3 /CLONE=IMAGE:4784133 /TID=Xl.25731.1 /CNT=16 /FEA=EST /TIER=ConsEnd /STK=2 /UG=Xl.25731 /UG_TITLE=ESTs, Highly similar to PSA1_HUMAN Proteasome subunit alpha type 1 (Proteasome component C2) (Macropain subunit C2) (Multicatalytic endopeptidase complex subunit C2) (Proteasome nu chain) (30 kDa prosomal protein) (PROS-30) (H.sapiens)
Xl.24358.1.A1_at	3.42459	3.29407	3.29407	6.55843	6.31329	5.63393	5.71548	3.33757	6.05528	-2.71771	-9.93553	5.96753e-06	9.40152e-05	4.49909	gb:BJ086239 /DB_XREF=gi:17582566 /DB_XREF=BJ086239 /CLONE=XL052h07 /TID=Xl.24358.1 /CNT=5 /FEA=EST /TIER=ConsEnd /STK=4 /UG=Xl.24358 /UG_TITLE=ESTs, Highly similar to PRS4_HUMAN 26S protease regulatory subunit 4 (P26s4) (H.sapiens)
Xl.7190.1.A1_at	6.62421	6.31317	6.31317	9.2568	8.62433	9.08895	9.56518	6.41685	9.13381	-2.71696	-10.408	4.13836e-06	7.41484e-05	4.87968	gb:BJ076027 /DB_XREF=gi:17520943 /DB_XREF=BJ076027 /CLONE=XL104g15 /TID=Xl.7190.1 /CNT=8 /FEA=EST /TIER=ConsEnd /STK=2 /UG=Xl.7190 /UG_TITLE=ESTs
Xl.5985.1.S1_at	2.71064	4.44402	4.44402	7.18084	6.68726	5.83491	6.62621	3.86623	6.5823	-2.71608	-5.61431	0.000410841	0.00153348	0.0183749	gb:AW766696 /DB_XREF=gi:7698689 /DB_XREF=da68a09.x1 /CLONE=IMAGE:3200056 /TID=Xl.5985.1 /CNT=14 /FEA=mRNA /TIER=ConsEnd /STK=1 /UG=Xl.5985 /UG_TITLE=Xenopus laevis, Similar to dipeptidylpeptidase III, clone IMAGE:5543151, mRNA, partial cds
Xl.1092.1.S1_at	7.28627	7.75226	7.75226	10.1209	10.1958	10.5204	10.4077	7.59693	10.3112	-2.7143	-12.2817	1.10414e-06	3.29878e-05	6.23635	gb:BQ384893 /DB_XREF=gi:21072580 /DB_XREF=NISC_mn09c06.x1 /CLONE=IMAGE:5073010 /TID=Xl.1092.1 /CNT=40 /FEA=mRNA /TIER=ConsEnd /STK=0 /UG=Xl.1092 /UG_TITLE=Elongation factor 1 gamma {type 2} (Xenopus laevis=South African clawed frogs, oocytes, mRNA, 1466 nt)
Xl.7983.1.S1_at	4.57906	5.23409	5.23409	7.95485	7.36938	7.83865	7.75506	5.01575	7.72948	-2.71374	-10.6588	3.42724e-06	6.55776e-05	5.07499	gb:AB004794.2 /DB_XREF=gi:5811542 /TID=Xl.7983.1 /CNT=29 /FEA=FLmRNA /TIER=FL /STK=1 /UG=Xl.7983 /DEF=Xenopus laevis mRNA for DUF140, complete cds. /PROD=DUF140 /FL=gb:AB004794.2
Xl.4001.1.A1_at	4.31159	2.95372	2.95372	6.89293	5.89015	5.11606	6.58084	3.40634	6.12	-2.71365	-5.47629	0.000486633	0.00173625	-0.162018	gb:BF072187 /DB_XREF=gi:10848826 /DB_XREF=db52h05.x1 /CLONE=IMAGE:3302169 /TID=Xl.4001.1 /CNT=1 /FEA=EST /TIER=ConsEnd /STK=1 /UG=Xl.4001 /UG_TITLE=EST
Xl.6282.1.S1_at	6.64639	6.28799	6.28799	9.1426	9.3758	9.01077	8.93901	6.40746	9.11705	-2.70959	-12.7286	8.27576e-07	2.66238e-05	6.52821	gb:BI448810 /DB_XREF=gi:15273517 /DB_XREF=dac69d09.x1 /CLONE=IMAGE:4435264 /TID=Xl.6282.1 /CNT=114 /FEA=EST /TIER=Stack /STK=32 /UG=Xl.6282 /UG_TITLE=ESTs, Moderately similar to cyclin A1 (Homo sapiens) (H.sapiens)
Xl.16675.1.A1_at	3.40603	2.34679	2.34679	5.67365	5.32034	5.46766	5.17241	2.69987	5.40851	-2.70864	-8.88987	1.41881e-05	0.000164226	3.59215	gb:BJ090210 /DB_XREF=gi:17588321 /DB_XREF=BJ090210 /CLONE=XL107c10 /TID=Xl.16675.1 /CNT=4 /FEA=EST /TIER=ConsEnd /STK=4 /UG=Xl.16675 /UG_TITLE=ESTs
Xl.26359.1.A1_at	5.91891	4.44402	4.44402	7.55399	7.63284	7.88888	7.49979	4.93565	7.64388	-2.70823	-7.29218	6.35678e-05	0.000433037	2.00583	gb:CD328882 /DB_XREF=gi:31093213 /DB_XREF=AGENCOURT_14292248 /CLONE=IMAGE:6950301 /TID=Xl.26359.1 /CNT=2 /FEA=EST /TIER=ConsEnd /STK=2 /UG=Xl.26359 /UG_TITLE=ESTs, Moderately similar to ACDM_HUMAN Acyl-CoA dehydrogenase, medium-chain specific, mitochondrial precursor (MCAD) (H.sapiens)
Xl.6693.2.S1_x_at	4.39444	3.04127	3.04127	6.24744	4.91796	7.09873	6.5345	3.49233	6.19965	-2.70733	-5.00253	0.000887837	0.00273226	-0.802051	gb:BF071960 /DB_XREF=gi:10848599 /DB_XREF=db49a05.x1 /CLONE=IMAGE:3301808 /TID=Xl.6693.2 /CNT=9 /FEA=EST /TIER=ConsEnd /STK=1 /UG=Xl.6693 /UG_TITLE=ESTs, Moderately similar to hypothetical protein FLJ10099 (Homo sapiens) (H.sapiens)
Xl.12041.1.A1_at	3.28245	4.94272	4.94272	6.56801	6.88998	7.28399	7.6437	4.3893	7.09642	-2.70712	-5.99675	0.000260451	0.00111573	0.504185	gb:BG370976 /DB_XREF=gi:13267513 /DB_XREF=dac47b10.x1 /CLONE=IMAGE:4433226 /TID=Xl.12041.1 /CNT=2 /FEA=EST /TIER=ConsEnd /STK=2 /UG=Xl.12041 /UG_TITLE=ESTs
Xl.15326.1.S1_at	6.50442	6.86733	6.86733	9.97455	10.0917	8.16703	9.57821	6.74636	9.45286	-2.7065	-6.05415	0.000243631	0.0010615	0.575344	gb:BC042255.1 /DB_XREF=gi:27503917 /TID=Xl.15326.1 /CNT=8 /FEA=FLmRNA /TIER=FL /STK=2 /UG=Xl.15326 /DEF=Xenopus laevis, Similar to hypothetical protein FLJ13352, clone MGC:53983 IMAGE:5571143, mRNA, complete cds. /PROD=Similar to hypothetical protein FLJ13352 /FL=gb:BC042255.1
Xl.16576.1.A1_at	5.07137	2.95372	2.95372	5.97796	5.46766	6.60535	7.4126	3.6596	6.36589	-2.70629	-4.37019	0.00208317	0.00541172	-1.7068	gb:BJ049197 /DB_XREF=gi:17374857 /DB_XREF=BJ049197 /CLONE=XL025f11 /TID=Xl.16576.1 /CNT=3 /FEA=EST /TIER=ConsEnd /STK=1 /UG=Xl.16576 /UG_TITLE=ESTs
Xl.2098.1.A1_at	3.21813	2.92027	2.92027	6.00685	5.21387	5.80162	5.87152	3.01956	5.72347	-2.70391	-10.9262	2.81516e-06	5.84668e-05	5.27823	gb:BG486824 /DB_XREF=gi:13434401 /DB_XREF=dc98b03.x1 /CLONE=IMAGE:3404885 /TID=Xl.2098.1 /CNT=2 /FEA=EST /TIER=ConsEnd /STK=1 /UG=Xl.2098 /UG_TITLE=ESTs, Weakly similar to JC5405 brain and muscle Ah receptor nuclear translocator-like protein, BMAL1b - human (H.sapiens)
Xl.6656.1.A1_at	4.78156	3.51528	3.51528	6.8014	5.75353	7.0737	6.93107	3.93737	6.63992	-2.70255	-6.36455	0.000171024	0.00082948	0.952483	gb:BF072185 /DB_XREF=gi:10848824 /DB_XREF=db52h02.x1 /CLONE=IMAGE:3302163 /TID=Xl.6656.1 /CNT=5 /FEA=EST /TIER=ConsEnd /STK=0 /UG=Xl.6656 /UG_TITLE=ESTs, Weakly similar to GGA1_HUMAN ADP-ribosylation factor binding protein GGA1 (Golgi-localized, gamma ear-containing, ARF-binding protein 1) (Gamma-adaptin related protein 1) (H.sapiens)
Xl.4992.2.A1_at	5.09425	5.22192	5.22192	7.44273	7.27968	8.7063	8.09307	5.17936	7.88045	-2.70108	-7.77188	3.95145e-05	0.000319595	2.51039	gb:BG022263 /DB_XREF=gi:12478342 /DB_XREF=daa73f09.x1 /CLONE=IMAGE:4061704 /TID=Xl.4992.2 /CNT=14 /FEA=EST /TIER=Stack /STK=7 /UG=Xl.4992 /UG_TITLE=Xenopus laevis, Similar to Fms interacting protein, clone MGC:53814 IMAGE:5542147, mRNA, complete cds
Xl.12504.1.A1_at	6.84841	5.27258	5.27258	8.77996	8.22016	8.52145	8.4724	5.79786	8.49849	-2.70063	-6.81931	0.000104004	0.000590455	1.48222	gb:BQ386646 /DB_XREF=gi:21074333 /DB_XREF=NISC_mn19d06.x1 /CLONE=IMAGE:5073850 /TID=Xl.12504.1 /CNT=5 /FEA=EST /TIER=ConsEnd /STK=3 /UG=Xl.12504 /UG_TITLE=ESTs
Xl.993.1.S1_at	5.48315	5.47275	5.47275	8.24532	8.2719	7.17615	9.01336	5.47621	8.17668	-2.70047	-6.9714	8.8536e-05	0.000530154	1.65358	gb:AB026192.1 /DB_XREF=gi:7768635 /TID=Xl.993.1 /CNT=4 /FEA=FLmRNA /TIER=FL /STK=1 /UG=Xl.993 /DEF=Xenopus laevis mRNA for Kielin, complete cds. /PROD=Kielin /FL=gb:AB026192.1
Xl.744.1.S1_at	6.65705	6.62531	6.62531	9.11361	8.95153	9.6503	9.62796	6.63589	9.33585	-2.69997	-11.199	2.31334e-06	5.09955e-05	5.48045	gb:BC047981.1 /DB_XREF=gi:28838520 /TID=Xl.744.1 /CNT=71 /FEA=FLmRNA /TIER=FL+Stack /STK=28 /UG=Xl.744 /DEF=Xenopus laevis, Similar to DEADH (Asp-Glu-Ala-AspHis) box polypeptide 5 (RNA helicase, 68kDa), clone MGC:53795 IMAGE:5541855, mRNA, complete cds. /PROD=Similar to DEADH (Asp-Glu-Ala-AspHis) boxpolypeptide 5 (RNA helicase, 68kDa) /FL=gb:BC047981.1
Xl.14330.2.S1_at	2.87078	3.7754	3.7754	6.38215	6.01068	5.73404	6.55426	3.47386	6.17028	-2.69642	-8.63325	1.77767e-05	0.000190359	3.35475	gb:BG021901 /DB_XREF=gi:12477980 /DB_XREF=df92f03.x1 /CLONE=IMAGE:3746836 /TID=Xl.14330.2 /CNT=6 /FEA=EST /TIER=ConsEnd /STK=2 /UG=Xl.14330 /UG_TITLE=ESTs, Moderately similar to Z151_HUMAN Zinc finger protein 151 (Myc-interacting zinc finger protein) (Miz-1 protein) (H.sapiens)
Xl.10907.2.A1_at	4.73706	3.26707	3.26707	6.02173	5.98018	7.01867	6.7776	3.75707	6.44955	-2.69248	-6.19814	0.000206441	0.000948998	0.751902	gb:BE027005 /DB_XREF=gi:8320399 /DB_XREF=db35f02.x1 /CLONE=IMAGE:3300507 /TID=Xl.10907.2 /CNT=3 /FEA=EST /TIER=ConsEnd /STK=1 /UG=Xl.10907 /UG_TITLE=ESTs, Weakly similar to RIKEN cDNA 1810049H13 (Mus musculus) (M.musculus)
Xl.1807.1.A1_at	4.99021	3.97003	3.97003	6.86506	6.49092	7.91889	6.71597	4.31009	6.99771	-2.68762	-6.66612	0.000122643	0.000655749	1.30672	gb:BJ043630 /DB_XREF=gi:17417916 /DB_XREF=BJ043630 /CLONE=XL010j10 /TID=Xl.1807.1 /CNT=19 /FEA=EST /TIER=Stack /STK=7 /UG=Xl.1807 /UG_TITLE=ESTs, Moderately similar to SFPQ_HUMAN Splicing factor, proline-and glutamine-rich (Polypyrimidine tract-binding protein-associated splicing factor) (PTB-associated splicing factor) (PSF) (DNA-binding P52P100 complex, 100 kDa subunit) (H.sapiens)
Xl.15028.1.A1_at	5.21276	4.73706	4.73706	8.21241	7.90462	7.64298	6.56519	4.89563	7.5813	-2.68567	-6.97332	8.83575e-05	0.000529361	1.65573	gb:BJ078621 /DB_XREF=gi:17523537 /DB_XREF=BJ078621 /CLONE=XL065k12 /TID=Xl.15028.1 /CNT=3 /FEA=EST /TIER=ConsEnd /STK=3 /UG=Xl.15028 /UG_TITLE=ESTs, Weakly similar to Yeast protein 00926 like (Caenorhabditis elegans) (C.elegans)
Xl.8955.1.A1_at	5.7539	6.11989	6.11989	8.86576	8.43511	8.1847	9.2414	5.9979	8.68174	-2.68384	-9.30967	9.92346e-06	0.000128635	3.96752	gb:BJ055861 /DB_XREF=gi:17469078 /DB_XREF=BJ055861 /CLONE=XL050o19 /TID=Xl.8955.1 /CNT=3 /FEA=EST /TIER=ConsEnd /STK=3 /UG=Xl.8955 /UG_TITLE=ESTs, Moderately similar to PDX3_HUMAN Thioredoxin-dependent peroxide reductase, mitochondrial precursor (Peroxiredoxin 3) (Antioxidant protein 1) (AOP-1) (MER5 protein homolog) (HBC189) (PRX III) (H.sapiens)
Xl.504.1.S1_at	6.55601	6.71316	6.71316	8.73714	8.58825	9.8702	10.1727	6.66078	9.34207	-2.68129	-6.61787	0.000129251	0.000681565	1.25083	gb:AB000458.1 /DB_XREF=gi:2554595 /TID=Xl.504.1 /CNT=20 /FEA=FLmRNA /TIER=FL+Stack /STK=6 /UG=Xl.504 /UG_TITLE=Xenopus laevis Xem1 mRNA for transmembrane protein, complete cds /DEF=Xenopus laevis Xem1 mRNA for transmembrane protein, complete cds. /FL=gb:AB000458.1
Xl.736.1.S1_at	4.44875	5.86986	5.86986	8.30844	8.4764	8.55686	6.9613	5.39616	8.07575	-2.6796	-5.45777	0.000497912	0.00177099	-0.186428	gb:AF310008.1 /DB_XREF=gi:12007283 /TID=Xl.736.1 /CNT=28 /FEA=FLmRNA /TIER=FL+Stack /STK=12 /UG=Xl.736 /DEF=Xenopus laevis putative transmembrane protein TA-2 mRNA, complete cds. /PROD=putative transmembrane protein TA-2 /FL=gb:AF310008.1
Xl.6179.1.A1_at	5.15346	4.47693	4.47693	7.85213	6.81976	7.19787	7.64724	4.70244	7.37925	-2.67681	-8.59228	1.84376e-05	0.000194629	3.31627	gb:AW782551 /DB_XREF=gi:7797157 /DB_XREF=da95d09.x1 /TID=Xl.6179.1 /CNT=6 /FEA=EST /TIER=ConsEnd /STK=2 /UG=Xl.6179 /UG_TITLE=ESTs, Moderately similar to S13525 transcription factor usf - human (H.sapiens)
Xl.25415.1.A1_at	6.55601	6.76364	6.76364	9.32018	9.19157	9.83055	9.14053	6.69443	9.37071	-2.67628	-11.4756	1.90381e-06	4.62268e-05	5.68051	gb:BJ083604 /DB_XREF=gi:17578752 /DB_XREF=BJ083604 /CLONE=XL085k15 /TID=Xl.25415.1 /CNT=7 /FEA=EST /TIER=ConsEnd /STK=3 /UG=Xl.25415 /UG_TITLE=ESTs, Weakly similar to T46420 hypothetical protein DKFZp434M1123.1 - human (fragment) (H.sapiens)
Xl.6421.1.A1_at	2.87407	4.47693	4.47693	6.15335	6.5277	6.94909	6.83618	3.94265	6.61658	-2.67393	-6.37023	0.000169939	0.000825613	0.959263	gb:AW633197 /DB_XREF=gi:7390278 /DB_XREF=bl04g12.x1 /CLONE=PBX0004G12 /TID=Xl.6421.1 /CNT=5 /FEA=EST /TIER=ConsEnd /STK=0 /UG=Xl.6421 /UG_TITLE=ESTs
Xl.15846.1.A1_at	2.59167	2.39359	2.39359	5.25988	4.5706	4.89305	5.80116	2.45962	5.13117	-2.67155	-8.84318	1.47764e-05	0.000167432	3.54941	gb:BJ054758 /DB_XREF=gi:17423082 /DB_XREF=BJ054758 /CLONE=XL046e17 /TID=Xl.15846.1 /CNT=3 /FEA=EST /TIER=ConsEnd /STK=3 /UG=Xl.15846 /UG_TITLE=ESTs
Xl.4303.1.S1_at	3.52657	4.92885	4.92885	6.89031	7.10855	7.44831	7.08199	4.46142	7.13229	-2.67086	-7.31464	6.21355e-05	0.00042903	2.03004	gb:BC043794.1 /DB_XREF=gi:27694723 /TID=Xl.4303.1 /CNT=32 /FEA=FLmRNA /TIER=FL+Stack /STK=15 /UG=Xl.4303 /DEF=Xenopus laevis, clone MGC:53050 IMAGE:5537511, mRNA, complete cds. /PROD=Unknown (protein for MGC:53050) /FL=gb:BC043794.1
Xl.26103.1.S1_at	2.34679	2.7814	2.7814	6.08235	5.04368	4.87682	5.2263	2.63653	5.30729	-2.67076	-8.44921	2.09681e-05	0.000213491	3.18062	gb:AF306722.1 /DB_XREF=gi:11119116 /TID=Xl.26103.1 /CNT=4 /FEA=FLmRNA /TIER=FL /STK=3 /UG=Xl.26103 /DEF=Xenopus laevis centrin 3 mRNA, complete cds. /PROD=centrin 3 /FL=gb:AF306722.1
Xl.5951.1.A1_at	5.17728	3.60405	3.60405	7.03314	7.23323	7.0659	5.8623	4.12846	6.79864	-2.67019	-5.5948	0.000420728	0.00155923	-0.00696615	gb:BF232549 /DB_XREF=gi:11175304 /DB_XREF=de07d09.x1 /CLONE=IMAGE:3437248 /TID=Xl.5951.1 /CNT=7 /FEA=EST /TIER=Stack /STK=6 /UG=Xl.5951 /UG_TITLE=ESTs, Moderately similar to A37157 3-methyl-2-oxobutanoate dehydrogenase (lipoamide) (EC 1.2.4.4) E1-beta chain precursor - human (H.sapiens)
Xl.6807.2.S1_at	3.34424	4.97039	4.97039	7.58761	7.23432	6.5874	6.98434	4.42834	7.09842	-2.67008	-6.12493	0.000224507	0.00100564	0.662483	gb:BE575893 /DB_XREF=gi:9825670 /DB_XREF=dc63a07.x1 /CLONE=IMAGE:3401748 /TID=Xl.6807.2 /CNT=62 /FEA=EST /TIER=Stack /STK=10 /UG=Xl.6807 /UG_TITLE=Xenopus laevis mRNA for histone-binding protein N1N2
Xl.25394.1.A1_at	4.18219	2.7814	2.7814	6.08235	5.61191	5.0365	6.93579	3.24833	5.91664	-2.66831	-5.28047	0.000621547	0.00208605	-0.422633	gb:BJ043827 /DB_XREF=gi:17419680 /DB_XREF=BJ043827 /CLONE=XL011e21 /TID=Xl.25394.1 /CNT=2 /FEA=EST /TIER=ConsEnd /STK=2 /UG=Xl.25394 /UG_TITLE=ESTs
Xl.3652.1.S1_at	6.82899	7.37026	7.37026	9.67562	9.62392	9.84613	10.2808	7.18983	9.85663	-2.6668	-10.5692	3.66441e-06	6.89454e-05	5.00574	gb:BC043755.1 /DB_XREF=gi:27696241 /TID=Xl.3652.1 /CNT=45 /FEA=FLmRNA /TIER=FL+Stack /STK=13 /UG=Xl.3652 /DEF=Xenopus laevis, Similar to RIKEN cDNA 1110003H02 gene, clone MGC:52900 IMAGE:4889307, mRNA, complete cds. /PROD=Similar to RIKEN cDNA 1110003H02 gene /FL=gb:BC043755.1
Xl.4341.1.A1_at	4.99384	4.89567	4.89567	7.67437	7.66356	7.48877	7.53267	4.9284	7.58984	-2.66145	-14.4289	2.98965e-07	1.44878e-05	7.54428	gb:BQ384959 /DB_XREF=gi:21072646 /DB_XREF=NISC_mn09f05.x1 /CLONE=IMAGE:5073152 /TID=Xl.4341.1 /CNT=2 /FEA=EST /TIER=ConsEnd /STK=0 /UG=Xl.4341 /UG_TITLE=ESTs
Xl.25367.1.A1_at	4.31292	4.18249	4.18249	6.48536	6.92485	7.09898	7.029	4.22596	6.88455	-2.65858	-12.1001	1.24475e-06	3.51251e-05	6.11452	gb:AW199319 /DB_XREF=gi:6479888 /DB_XREF=da19e05.x1 /CLONE=XENOPUS_SOURCE_ID:xlnga002k09 /TID=Xl.25367.1 /CNT=3 /FEA=EST /TIER=ConsEnd /STK=1 /UG=Xl.25367 /UG_TITLE=ESTs
Xl.12540.2.A1_at	6.87417	6.0066	6.0066	9.74958	8.44788	8.95591	8.66371	6.29579	8.95427	-2.65848	-7.27561	6.46475e-05	0.000437781	1.98793	gb:BJ087669 /DB_XREF=gi:17584612 /DB_XREF=BJ087669 /CLONE=XL082d17 /TID=Xl.12540.2 /CNT=2 /FEA=EST /TIER=ConsEnd /STK=2 /UG=Xl.12540 /UG_TITLE=ESTs, Weakly similar to YRHUR2 dopachrome Delta-isomerase (EC 5.3.3.12) precursor - human (H.sapiens)
Xl.670.1.S1_at	6.46261	6.20424	6.20424	8.72124	9.11583	8.72832	9.21598	6.29036	8.94534	-2.65498	-12.041	1.29471e-06	3.57687e-05	6.07447	gb:AF190623.1 /DB_XREF=gi:9801986 /GEN=DEADSouth /TID=Xl.670.1 /CNT=38 /FEA=FLmRNA /TIER=FL+Stack /STK=7 /UG=Xl.670 /DEF=Xenopus laevis DEADSouth RNA helicase (DEADSouth) mRNA, complete cds. /PROD=DEADSouth RNA helicase /FL=gb:AF190623.1
Xl.18931.1.A1_at	4.98044	5.29568	5.29568	7.74882	7.87402	7.97888	7.76738	5.1906	7.84227	-2.65168	-13.4798	5.20147e-07	1.97955e-05	6.99462	gb:BI448233 /DB_XREF=gi:15272940 /DB_XREF=dac73e01.x1 /CLONE=IMAGE:4435680 /TID=Xl.18931.1 /CNT=2 /FEA=EST /TIER=ConsEnd /STK=2 /UG=Xl.18931 /UG_TITLE=ESTs, Moderately similar to JC5707 HYA22 protein - human (H.sapiens)
Xl.14905.1.A1_at	3.24386	4.44402	4.44402	6.7886	7.40082	5.73404	6.85625	4.04396	6.69493	-2.65096	-5.95096	0.000274784	0.00115685	0.44708	gb:BM180625 /DB_XREF=gi:17404696 /DB_XREF=daj37g10.x1 /CLONE=IMAGE:5078611 /TID=Xl.14905.1 /CNT=1 /FEA=EST /TIER=ConsEnd /STK=1 /UG=Xl.14905 /UG_TITLE=EST
Xl.12848.3.S1_a_at	6.1475	6.07208	6.07208	8.61423	8.27908	8.80236	9.29083	6.09722	8.74662	-2.6494	-10.0886	5.29158e-06	8.76805e-05	4.62428	gb:CA984979 /DB_XREF=gi:27517645 /DB_XREF=AGENCOURT_10945698 /CLONE=IMAGE:6856683 /TID=Xl.12848.3 /CNT=15 /FEA=EST /TIER=ConsEnd /STK=0 /UG=Xl.12848 /UG_TITLE=ESTs, Moderately similar to alpha 3 type IV collagen binding protein, isoform 2; goodpasture antigen-binding protein (Homo sapiens) (H.sapiens)
Xl.2419.2.S1_at	4.87907	4.86945	4.86945	7.30483	7.88951	7.84261	7.04874	4.87266	7.52142	-2.64877	-10.2416	4.69976e-06	8.10462e-05	4.74761	gb:BJ044132 /DB_XREF=gi:17395237 /DB_XREF=BJ044132 /CLONE=XL012f13 /TID=Xl.2419.2 /CNT=7 /FEA=EST /TIER=ConsEnd /STK=2 /UG=Xl.2419 /UG_TITLE=ESTs, Moderately similar to hypothetical protein HSPC148 (Homo sapiens) (H.sapiens)
Xl.6213.1.S1_at	5.80529	5.9328	5.9328	9.49106	8.92139	8.19825	7.52728	5.8903	8.5345	-2.6442	-6.16912	0.000213404	0.000972598	0.716543	gb:AW782724 /DB_XREF=gi:7797330 /DB_XREF=db22f07.x1 /CLONE=XENOPUS_SOURCE_ID: /TID=Xl.6213.1 /CNT=3 /FEA=EST /TIER=ConsEnd /STK=3 /UG=Xl.6213 /UG_TITLE=ESTs, Weakly similar to T14766 hypothetical protein DKFZp564K247.1 - human (H.sapiens)
Xl.21886.1.S1_at	7.85385	7.68405	7.68405	10.7496	10.8843	9.92436	9.97461	7.74065	10.3832	-2.64258	-9.02591	1.26169e-05	0.000151416	3.71552	gb:BC043886.1 /DB_XREF=gi:27881784 /TID=Xl.21886.1 /CNT=4 /FEA=mRNA /TIER=ConsEnd /STK=1 /UG=Xl.21886 /UG_TITLE=Xenopus laevis, Similar to tissue specific transplantation antigen P35B, clone IMAGE:5537421, mRNA, partial cds /DEF=Xenopus laevis, Similar to tissue specific transplantation antigen P35B, clone IMAGE:5537421, mRNA, partial cds.
Xl.8902.2.S2_at	6.08126	7.22616	7.22616	9.59508	9.39938	9.82575	9.11077	6.84452	9.48275	-2.63822	-7.9168	3.43813e-05	0.00029402	2.65782	gb:BJ086333 /DB_XREF=gi:17582696 /DB_XREF=BJ086333 /CLONE=XL052m03 /TID=Xl.8902.2 /CNT=65 /FEA=EST /TIER=Stack /STK=12 /UG=Xl.8902 /UG_TITLE=Xenopus laevis, similar to translation initiation factor eIF-5A, clone MGC:53096 IMAGE:5542286, mRNA, complete cds
Xl.6576.1.A1_at	5.6331	3.71927	3.71927	6.50542	7.6778	6.73117	7.06295	4.35721	6.99433	-2.63712	-5.23278	0.000660249	0.00218529	-0.48694	gb:BJ087139 /DB_XREF=gi:17583821 /DB_XREF=BJ087139 /CLONE=XL055i19 /TID=Xl.6576.1 /CNT=14 /FEA=EST /TIER=ConsEnd /STK=4 /UG=Xl.6576 /UG_TITLE=ESTs, Moderately similar to calumenin precursor (Homo sapiens) (H.sapiens)
Xl.15612.1.A1_at	4.15218	3.31369	3.31369	6.72729	5.95067	5.64933	6.59338	3.59319	6.23017	-2.63698	-7.6474	4.46038e-05	0.000344502	2.38194	gb:BJ079143 /DB_XREF=gi:17524059 /DB_XREF=BJ079143 /CLONE=XL067g23 /TID=Xl.15612.1 /CNT=2 /FEA=EST /TIER=ConsEnd /STK=2 /UG=Xl.15612 /UG_TITLE=ESTs
Xl.24244.1.A1_at	3.65648	3.63357	3.63357	7.02468	6.29215	6.23014	5.56327	3.64121	6.27756	-2.63635	-8.11067	2.86299e-05	0.000258705	2.85156	gb:CB984027 /DB_XREF=gi:30278551 /DB_XREF=AGENCOURT_13967881 /CLONE=IMAGE:6935980 /TID=Xl.24244.1 /CNT=10 /FEA=EST /TIER=ConsEnd /STK=0 /UG=Xl.24244 /UG_TITLE=ESTs, Weakly similar to hypothetical protein FLJ20666 (Homo sapiens) (H.sapiens)
Xl.20538.1.S1_at	4.89096	3.15648	3.15648	4.85505	6.1251	6.97316	7.52899	3.73464	6.37057	-2.63594	-3.92841	0.00391317	0.00904644	-2.37169	gb:CD327089 /DB_XREF=gi:31091420 /DB_XREF=AGENCOURT_14146959 /CLONE=IMAGE:6948031 /TID=Xl.20538.1 /CNT=2 /FEA=EST /TIER=ConsEnd /STK=0 /UG=Xl.20538 /UG_TITLE=ESTs, Moderately similar to MFH-amplified sequences with leucine-rich tandem repeats 1 (Homo sapiens) (H.sapiens)
Xl.24755.1.S1_at	3.71755	4.23421	4.23421	6.70771	6.41621	7.17615	6.4905	4.06199	6.69764	-2.63565	-10.087	5.29824e-06	8.76805e-05	4.62298	gb:BJ044119 /DB_XREF=gi:17395224 /DB_XREF=BJ044119 /CLONE=XL012e20 /TID=Xl.24755.1 /CNT=15 /FEA=EST /TIER=ConsEnd /STK=2 /UG=Xl.24755 /UG_TITLE=ESTs, Highly similar to GLMB_HUMAN Glia maturation factor beta (GMF-beta) (H.sapiens)
Xl.8366.1.S1_at	4.92557	4.22281	4.22281	7.65577	6.95795	6.09806	7.65468	4.45706	7.09162	-2.63455	-6.43513	0.000158066	0.000782158	1.03644	gb:BC040973.1 /DB_XREF=gi:27371311 /TID=Xl.8366.1 /CNT=17 /FEA=FLmRNA /TIER=FL+Stack /STK=9 /UG=Xl.8366 /DEF=Xenopus laevis, clone MGC:52856 IMAGE:4887818, mRNA, complete cds. /PROD=Unknown (protein for MGC:52856) /FL=gb:BC040973.1
Xl.17011.1.S1_at	4.26734	4.48337	4.48337	7.7394	8.00735	6.45446	5.97796	4.41136	7.04479	-2.63343	-5.44839	0.000503737	0.00178507	-0.198818	gb:BM260391 /DB_XREF=gi:17923431 /DB_XREF=dai20f04.x1 /CLONE=IMAGE:4959895 /TID=Xl.17011.1 /CNT=2 /FEA=EST /TIER=ConsEnd /STK=1 /UG=Xl.17011 /UG_TITLE=ESTs
Xl.8919.3.S1_x_at	3.18705	3.28216	3.28216	5.90662	4.87534	6.74458	6.0068	3.25045	5.88334	-2.63288	-6.69814	0.000118462	0.000641458	1.34366	gb:CD360597 /DB_XREF=gi:31132008 /DB_XREF=AGENCOURT_14239400 /CLONE=IMAGE:6957019 /TID=Xl.8919.3 /CNT=66 /FEA=EST /TIER=Stack /STK=7 /UG=Xl.8919 /UG_TITLE=Xenopus laevis, clone MGC:52610 IMAGE:5543269, mRNA, complete cds
Xl.22475.1.S1_at	5.96887	6.1575	6.1575	8.65538	9.72815	7.01118	9.51414	6.09462	8.72721	-2.63259	-4.45849	0.00184279	0.00489012	-1.57704	gb:BF047445 /DB_XREF=gi:10765948 /DB_XREF=dc87e10.x1 /CLONE=IMAGE:3404106 /TID=Xl.22475.1 /CNT=3 /FEA=EST /TIER=ConsEnd /STK=1 /UG=Xl.22475 /UG_TITLE=ESTs
Xl.5340.1.A1_at	5.25916	4.74872	4.74872	7.388	8.03244	7.06527	7.71857	4.91887	7.55107	-2.6322	-9.31875	9.84851e-06	0.000128098	3.97547	gb:BJ079398 /DB_XREF=gi:17524314 /DB_XREF=BJ079398 /CLONE=XL072e12 /TID=Xl.5340.1 /CNT=4 /FEA=EST /TIER=ConsEnd /STK=4 /UG=Xl.5340 /UG_TITLE=ESTs, Weakly similar to nucleotide binding protein (Homo sapiens) (H.sapiens)
Xl.19122.1.S1_at	6.62663	6.66438	6.66438	9.24438	9.22171	9.22257	9.4426	6.6518	9.28282	-2.63102	-14.2231	3.36119e-07	1.55384e-05	7.42864	gb:BC045270.1 /DB_XREF=gi:28279436 /TID=Xl.19122.1 /CNT=11 /FEA=FLmRNA /TIER=FL /STK=3 /UG=Xl.19122 /DEF=Xenopus laevis, Similar to CD2 antigen (cytoplasmic tail) binding protein 2, clone MGC:52836 IMAGE:4885151, mRNA, complete cds. /PROD=Similar to CD2 antigen (cytoplasmic tail)binding protein 2 /FL=gb:BC045270.1
Xl.23667.1.A1_at	2.95032	2.97409	2.97409	5.71237	5.84215	5.36684	5.4556	2.96617	5.59424	-2.62807	-12.8389	7.71854e-07	2.56206e-05	6.59852	gb:BJ086701 /DB_XREF=gi:17583209 /DB_XREF=BJ086701 /CLONE=XL053o04 /TID=Xl.23667.1 /CNT=5 /FEA=EST /TIER=ConsEnd /STK=3 /UG=Xl.23667 /UG_TITLE=ESTs, Weakly similar to INPP_HUMAN Inositol polyphosphate 1-phosphatase (IPPase) (IPP) (H.sapiens)
Xl.3881.1.S1_at	3.30331	2.6472	2.6472	5.42336	5.65785	5.26187	5.6306	2.86591	5.49342	-2.62752	-10.8383	3.00196e-06	6.10375e-05	5.21193	gb:BC042304.1 /DB_XREF=gi:27503185 /TID=Xl.3881.1 /CNT=35 /FEA=FLmRNA /TIER=FL /STK=5 /UG=Xl.3881 /DEF=Xenopus laevis, Similar to elongation of very long chain fatty acids (FEN1Elo2, SUR4Elo3, yeast)-like 1, clone MGC:52731 IMAGE:4683861, mRNA, complete cds. /PROD=Similar to elongation of very long chain fattyacids (FEN1Elo2, SUR4Elo3, yeast)-like 1 /FL=gb:BC042304.1
Xl.8245.1.S1_at	3.17425	3.39117	3.39117	6.06325	5.87078	5.24776	6.59463	3.31887	5.94411	-2.62524	-8.38948	2.21361e-05	0.000220497	3.1234	gb:BC041301.1 /DB_XREF=gi:27735440 /TID=Xl.8245.1 /CNT=10 /FEA=FLmRNA /TIER=FL /STK=2 /UG=Xl.8245 /DEF=Xenopus laevis, Similar to RIKEN cDNA 0610038P07 gene, clone MGC:53595 IMAGE:4683798, mRNA, complete cds. /PROD=Similar to RIKEN cDNA 0610038P07 gene /FL=gb:BC041301.1
Xl.10534.1.S1_at	4.31159	4.11408	4.11408	6.30134	6.4828	7.41689	7.01889	4.17991	6.80498	-2.62507	-8.88938	1.41942e-05	0.000164226	3.5917	gb:BE678370 /DB_XREF=gi:10059977 /DB_XREF=df54h03.x1 /CLONE=IMAGE:3743189 /TID=Xl.10534.1 /CNT=2 /FEA=EST /TIER=ConsEnd /STK=2 /UG=Xl.10534 /UG_TITLE=ESTs
Xl.8054.1.A1_at	3.13328	2.73059	2.73059	5.42782	5.84905	6.01943	4.65844	2.86482	5.48869	-2.62387	-7.72356	4.14098e-05	0.000329585	2.46073	gb:BM172477 /DB_XREF=gi:17312040 /DB_XREF=imageqc_4_2001smv292bdff41.x1 /CLONE=IMAGE:4782131 /TID=Xl.8054.1 /CNT=7 /FEA=EST /TIER=ConsEnd /STK=4 /UG=Xl.8054 /UG_TITLE=ESTs, Weakly similar to aryl hydrocarbon receptor-interacting protein; HBV-X associated protein (Homo sapiens) (H.sapiens)
Xl.15916.1.A1_at	4.4592	4.55582	4.55582	8.36785	5.598	7.24871	7.36704	4.52361	7.1454	-2.62179	-4.75104	0.00123767	0.00354568	-1.15501	gb:BJ091643 /DB_XREF=gi:17590395 /DB_XREF=BJ091643 /CLONE=XL097m04 /TID=Xl.15916.1 /CNT=3 /FEA=EST /TIER=ConsEnd /STK=2 /UG=Xl.15916 /UG_TITLE=ESTs, Weakly similar to T46291 hypothetical protein DKFZp434B0610.1 - human (fragment) (H.sapiens)
Xl.7202.1.S1_at	6.56877	5.29643	5.29643	8.33192	8.79121	7.98703	8.25736	5.72054	8.34188	-2.62134	-7.28949	6.37415e-05	0.000433662	2.00293	gb:BG264246 /DB_XREF=gi:12967298 /DB_XREF=de75c04.y1 /CLONE=IMAGE:3517446 /TID=Xl.7202.1 /CNT=7 /FEA=EST /TIER=ConsEnd /STK=0 /UG=Xl.7202 /UG_TITLE=ESTs, Highly similar to U123_HUMAN Hypothetical protein BK223H9.2MGC1346 (H.sapiens)
Xl.25611.1.A1_at	6.08822	5.69872	5.69872	8.45239	7.9007	8.96049	8.4797	5.82855	8.44832	-2.61977	-9.40455	9.17037e-06	0.000122041	4.05021	gb:BQ398713 /DB_XREF=gi:21086400 /DB_XREF=NISC_mo10b09.x1 /CLONE=IMAGE:5278793 /TID=Xl.25611.1 /CNT=2 /FEA=EST /TIER=ConsEnd /STK=2 /UG=Xl.25611 /UG_TITLE=ESTs
Xl.11500.1.A1_at	2.77435	3.39066	3.39066	5.50129	5.98018	5.41683	6.31329	3.18522	5.8029	-2.61768	-8.92986	1.37049e-05	0.000160449	3.62859	gb:BE575671 /DB_XREF=gi:9825470 /DB_XREF=dc61g01.x1 /CLONE=IMAGE:3401616 /TID=Xl.11500.1 /CNT=2 /FEA=EST /TIER=ConsEnd /STK=1 /UG=Xl.11500 /UG_TITLE=ESTs
Xl.15773.1.S1_at	6.03506	5.34518	5.34518	8.79216	7.69145	8.53163	7.74901	5.57514	8.19106	-2.61592	-7.63888	4.49779e-05	0.000346574	2.37308	gb:BC044127.1 /DB_XREF=gi:28277329 /TID=Xl.15773.1 /CNT=8 /FEA=FLmRNA /TIER=FL /STK=2 /UG=Xl.15773 /DEF=Xenopus laevis, Similar to Alg5, S. cerevisiae, homolog of, clone MGC:53652 IMAGE:4885148, mRNA, complete cds. /PROD=Similar to Alg5, S. cerevisiae, homolog of /FL=gb:BC044127.1
Xl.6429.1.A1_at	5.91963	5.46176	5.46176	8.6462	9.00444	8.43135	6.83569	5.61438	8.22942	-2.61504	-5.43392	0.000512864	0.00180793	-0.217945	gb:BJ080253 /DB_XREF=gi:17573863 /DB_XREF=BJ080253 /CLONE=XL074p24 /TID=Xl.6429.1 /CNT=3 /FEA=EST /TIER=ConsEnd /STK=3 /UG=Xl.6429 /UG_TITLE=ESTs, Weakly similar to JC7220 nuclear protein SR-25 - human (H.sapiens)
Xl.23091.1.A1_at	6.82481	5.82774	5.82774	8.78344	8.89553	8.92543	8.49108	6.1601	8.77387	-2.61378	-8.93291	1.36688e-05	0.00016019	3.63136	gb:BG159830 /DB_XREF=gi:12693749 /DB_XREF=de57e06.x1 /CLONE=IMAGE:3515986 /TID=Xl.23091.1 /CNT=11 /FEA=EST /TIER=ConsEnd /STK=4 /UG=Xl.23091 /UG_TITLE=ESTs
Xl.5504.1.A1_at	2.5212	2.49227	2.49227	5.14803	4.97397	6.10572	4.23299	2.50191	5.11518	-2.61326	-6.64615	0.000125331	0.000665712	1.28363	gb:BI450346 /DB_XREF=gi:15275053 /DB_XREF=dag32c03.x3 /CLONE=IMAGE:4783085 /TID=Xl.5504.1 /CNT=6 /FEA=EST /TIER=ConsEnd /STK=4 /UG=Xl.5504 /UG_TITLE=ESTs
Xl.15705.1.A1_at	5.92092	5.15176	5.15176	7.99242	8.1464	8.26975	7.66584	5.40815	8.0186	-2.61045	-9.65599	7.46345e-06	0.000107281	4.26567	gb:BJ057341 /DB_XREF=gi:17470134 /DB_XREF=BJ057341 /CLONE=XL034m06 /TID=Xl.15705.1 /CNT=3 /FEA=EST /TIER=ConsEnd /STK=1 /UG=Xl.15705 /UG_TITLE=ESTs, Weakly similar to GTP-binding protein (Caenorhabditis elegans) (C.elegans)
Xl.7390.1.A1_at	2.64068	2.30568	2.30568	4.94947	5.25988	4.41321	5.48853	2.41735	5.02777	-2.61043	-9.12898	1.15547e-05	0.000143889	3.80788	gb:AW766934 /DB_XREF=gi:7698863 /DB_XREF=da72f11.x1 /CLONE=IMAGE:3200493 /TID=Xl.7390.1 /CNT=12 /FEA=EST /TIER=Stack /STK=8 /UG=Xl.7390 /UG_TITLE=ESTs, Moderately similar to SN24_HUMAN Possible global transcription activator SNF2L4 (SNF2-beta) (BRG-1 protein) (Mitotic growth and transcription activator) (Brahma protein homolog 1) (H.sapiens)
Xl.24361.1.S1_at	7.18997	7.0856	7.0856	9.42721	9.55309	10.1603	9.76711	7.12039	9.72693	-2.60654	-11.2557	2.22192e-06	4.93925e-05	5.52191	gb:CB563454 /DB_XREF=gi:29482984 /DB_XREF=AGENCOURT_13322930 /CLONE=IMAGE:6875096 /TID=Xl.24361.1 /CNT=40 /FEA=EST /TIER=Stack /STK=10 /UG=Xl.24361 /UG_TITLE=ESTs, Highly similar to AR20_HUMAN ARP23 complex 20 kDa subunit (P20-ARC) (Actin-related protein 23 complex subunit 4) (H.sapiens)
Xl.5191.1.S1_at	7.99221	8.05966	8.05966	10.0434	10.7659	10.6272	11.1305	8.03717	10.6417	-2.60456	-9.55941	8.07348e-06	0.000112529	4.18354	gb:BC044689.1 /DB_XREF=gi:28277313 /TID=Xl.5191.1 /CNT=71 /FEA=FLmRNA /TIER=FL+Stack /STK=16 /UG=Xl.5191 /DEF=Xenopus laevis, similar to cathepsin B, clone MGC:53360 IMAGE:5571122, mRNA, complete cds. /PROD=similar to cathepsin B /FL=gb:BC044689.1
Xl.14899.1.A1_at	4.31159	3.26707	3.26707	6.1251	5.69427	6.69225	6.36134	3.61524	6.21824	-2.603	-7.56543	4.83485e-05	0.00036293	2.29642	gb:BM180603 /DB_XREF=gi:17404674 /DB_XREF=daj37d09.x1 /CLONE=IMAGE:5078465 /TID=Xl.14899.1 /CNT=3 /FEA=EST /TIER=ConsEnd /STK=2 /UG=Xl.14899 /UG_TITLE=ESTs
Xl.20076.1.S1_at	5.35602	6.5217	6.5217	8.49007	8.34791	8.89369	9.21136	6.13314	8.73576	-2.60262	-7.32888	6.12464e-05	0.000424592	2.04535	gb:BJ082748 /DB_XREF=gi:17577499 /DB_XREF=BJ082748 /CLONE=XL082j04 /TID=Xl.20076.1 /CNT=3 /FEA=EST /TIER=ConsEnd /STK=2 /UG=Xl.20076 /UG_TITLE=ESTs
Xl.5260.1.A1_at	4.80541	3.51219	3.51219	5.81619	6.04957	6.82572	7.48121	3.94326	6.54317	-2.59991	-5.44362	0.000506726	0.00179345	-0.205119	gb:BG160257 /DB_XREF=gi:12694176 /DB_XREF=df32a04.y1 /CLONE=IMAGE:3579942 /TID=Xl.5260.1 /CNT=4 /FEA=EST /TIER=ConsEnd /STK=0 /UG=Xl.5260 /UG_TITLE=ESTs, Weakly similar to TAT binding homolog 4 like (Caenorhabditis elegans) (C.elegans)
Xl.3178.1.A1_at	5.07532	4.71178	4.71178	7.57836	7.60526	7.42439	7.11065	4.83296	7.42967	-2.5967	-11.7874	1.53596e-06	4.02752e-05	5.90021	gb:BG346116 /DB_XREF=gi:13166540 /DB_XREF=dab90h07.x1 /CLONE=IMAGE:4405092 /TID=Xl.3178.1 /CNT=3 /FEA=EST /TIER=ConsEnd /STK=2 /UG=Xl.3178 /UG_TITLE=ESTs, Weakly similar to A55575 ankyrin 3, long splice form - human (H.sapiens)
Xl.9123.1.A1_at	3.78242	2.09558	2.09558	5.82421	5.07137	5.51881	4.59304	2.65786	5.25186	-2.594	-5.50188	0.0004715	0.00169755	-0.128363	gb:BG346514 /DB_XREF=gi:13166938 /DB_XREF=daa37e12.x1 /CLONE=IMAGE:4058590 /TID=Xl.9123.1 /CNT=2 /FEA=EST /TIER=ConsEnd /STK=1 /UG=Xl.9123 /UG_TITLE=ESTs, Moderately similar to PDZ domain protein (Drosophila inaD-like) (Homo sapiens) (H.sapiens)
Xl.4631.2.A1_at	3.71112	3.96155	3.96155	6.61432	6.10489	6.7424	6.41467	3.87807	6.46907	-2.591	-11.5157	1.85132e-06	4.51432e-05	5.70916	gb:BJ085223 /DB_XREF=gi:17581134 /DB_XREF=BJ085223 /CLONE=XL105d24 /TID=Xl.4631.2 /CNT=11 /FEA=EST /TIER=Stack /STK=9 /UG=Xl.4631 /UG_TITLE=Xenopus laevis histone stem-loop binding protein (SLBP) mRNA, complete cds
Xl.14332.1.A1_x_at	6.51288	6.42939	6.42939	9.54092	9.0036	9.08437	8.55281	6.45722	9.04542	-2.5882	-10.075	5.34824e-06	8.80008e-05	4.6132	gb:BE678121 /DB_XREF=gi:10059477 /DB_XREF=df82f02.x1 /CLONE=IMAGE:3745851 /TID=Xl.14332.1 /CNT=3 /FEA=EST /TIER=ConsEnd /STK=2 /UG=Xl.14332 /UG_TITLE=ESTs, Moderately similar to A180_MOUSE Clathrin coat assembly protein AP180 (Clathrin coat associated protein AP180) (Phosphoprotein F1-20) (91 kDa synaptosomal-associated protein) (M.musculus)
Xl.5146.1.A1_at	5.37241	7.14605	7.14605	9.44547	8.58922	10.073	8.46344	6.55484	9.14278	-2.58794	-4.76188	0.00121984	0.00350509	-1.13961	gb:BE505551 /DB_XREF=gi:9709010 /DB_XREF=dc25c01.x1 /CLONE=IMAGE:3398112 /TID=Xl.5146.1 /CNT=7 /FEA=EST /TIER=Stack /STK=7 /UG=Xl.5146 /UG_TITLE=ESTs, Weakly similar to B aggressive lymphoma gene (Homo sapiens) (H.sapiens)
Xl.7726.1.A1_at	6.97103	7.18255	7.18255	9.95159	9.14926	10.113	9.5735	7.11204	9.69683	-2.58479	-9.63396	7.59797e-06	0.000108795	4.247	gb:AW767901 /DB_XREF=gi:7699913 /DB_XREF=da81h02.x1 /CLONE=IMAGE:3201363 /TID=Xl.7726.1 /CNT=3 /FEA=EST /TIER=ConsEnd /STK=3 /UG=Xl.7726 /UG_TITLE=ESTs
Xl.9198.1.S1_at	6.40335	6.56283	6.56283	8.89853	8.83522	9.68425	8.95561	6.50967	9.0934	-2.58373	-10.0915	5.27976e-06	8.76805e-05	4.62661	gb:BG730245 /DB_XREF=gi:14015320 /DB_XREF=de11h06.y1 /CLONE=IMAGE:3437818 /TID=Xl.9198.1 /CNT=2 /FEA=EST /TIER=ConsEnd /STK=0 /UG=Xl.9198 /UG_TITLE=ESTs, Weakly similar to hypothetical protein MGC11102 (Homo sapiens) (H.sapiens)
Xl.12995.1.S1_at	5.6331	4.36959	4.36959	7.73611	7.09797	7.62566	7.03746	4.79076	7.3743	-2.58354	-7.12027	7.58128e-05	0.000482388	1.81859	gb:BJ098828 /DB_XREF=gi:17600829 /DB_XREF=BJ098828 /CLONE=XL148c02 /TID=Xl.12995.1 /CNT=4 /FEA=EST /TIER=ConsEnd /STK=2 /UG=Xl.12995 /UG_TITLE=ESTs, Weakly similar to hypothetical protein MGC9912 (Homo sapiens) (H.sapiens)
Xl.22119.1.S1_at	4.05551	6.38338	6.38338	8.44995	8.10901	8.48488	7.7189	5.60743	8.19069	-2.58326	-4.65974	0.00139949	0.00391549	-1.28541	gb:BG022869 /DB_XREF=gi:12478948 /DB_XREF=dab09b02.x1 /CLONE=IMAGE:4173651 /TID=Xl.22119.1 /CNT=27 /FEA=EST /TIER=Stack /STK=11 /UG=Xl.22119 /UG_TITLE=ESTs, Moderately similar to TATA box binding protein (TBP)-associated factor, RNA polymerase II, N, 68kD (RNA-binding protein 56); TATA box-binding protein-associated factor 2N (RNA-binding protein 56) (Homo sapiens) (H.sapiens)
Xl.15079.1.A1_at	6.44414	5.20511	5.20511	8.19078	7.22766	8.73512	8.64625	5.61812	8.19995	-2.58184	-5.75804	0.000345378	0.00136293	0.203354	gb:BI312897 /DB_XREF=gi:14987224 /DB_XREF=dai28f01.x1 /CLONE=IMAGE:4962961 /TID=Xl.15079.1 /CNT=4 /FEA=EST /TIER=ConsEnd /STK=2 /UG=Xl.15079 /UG_TITLE=ESTs, Highly similar to 2202330A beta integrin-linked protein kinase (Homo sapiens) (H.sapiens)
Xl.8249.1.S1_at	7.14617	7.57385	7.57385	10.3769	10.2911	9.60585	9.77669	7.43129	10.0126	-2.58135	-9.76065	6.8595e-06	0.000102048	4.3538	gb:BC041520.1 /DB_XREF=gi:27371121 /TID=Xl.8249.1 /CNT=31 /FEA=FLmRNA /TIER=FL+Stack /STK=11 /UG=Xl.8249 /DEF=Xenopus laevis, Similar to GCIP-interacting protein p29, clone MGC:53740 IMAGE:4930604, mRNA, complete cds. /PROD=Similar to GCIP-interacting protein p29 /FL=gb:BC041520.1
Xl.382.1.S1_at	5.35574	4.76982	4.76982	7.77141	7.59131	7.11425	7.69998	4.96513	7.54424	-2.57911	-10.062	5.40256e-06	8.80308e-05	4.60268	gb:U44047.1 /DB_XREF=gi:2231168 /TID=Xl.382.1 /CNT=32 /FEA=FLmRNA /TIER=FL+Stack /STK=12 /UG=Xl.382 /DEF=Xenopus laevis MCM2 mRNA, complete cds. /PROD=MCM2p /FL=gb:U44047.1 gb:BC046274.1 gb:D63919.1
Xl.5846.2.A1_at	9.04235	9.31379	9.31379	11.6319	11.6854	12.1003	11.7911	9.22331	11.8022	-2.57887	-12.2596	1.12021e-06	3.29878e-05	6.22168	gb:BJ083949 /DB_XREF=gi:17579246 /DB_XREF=BJ083949 /CLONE=XL086l03 /TID=Xl.5846.2 /CNT=52 /FEA=EST /TIER=Stack /STK=32 /UG=Xl.5846 /UG_TITLE=Xenopus laevis, similar to actin alpha, clone MGC:53823 IMAGE:5542285, mRNA, complete cds
Xl.8222.2.S1_at	7.65242	6.76202	6.76202	9.89529	9.93712	9.73108	8.98022	7.05882	9.63593	-2.57711	-7.79148	3.87732e-05	0.000316047	2.53046	gb:CB562088 /DB_XREF=gi:29481618 /DB_XREF=AGENCOURT_13321080 /CLONE=IMAGE:6879510 /TID=Xl.8222.2 /CNT=45 /FEA=EST /TIER=Stack /STK=16 /UG=Xl.8222 /UG_TITLE=X.laevis mRNA for 42Sp50 protein
Xl.17138.2.A1_at	3.17425	4.6044	4.6044	7.02521	5.83723	7.39692	6.55939	4.12769	6.70469	-2.577	-5.50298	0.000470865	0.00169727	-0.126925	gb:BM260898 /DB_XREF=gi:17923938 /DB_XREF=dag31d05.x3 /CLONE=IMAGE:4783136 /TID=Xl.17138.2 /CNT=1 /FEA=EST /TIER=ConsEnd /STK=1 /UG=Xl.17138 /UG_TITLE=ESTs, Weakly similar to apoptosis related protein APR-3; p18 protein (Homo sapiens) (H.sapiens)
Xl.6774.1.A1_at	3.76443	5.2371	5.2371	7.73708	7.40812	7.21078	6.93107	4.74621	7.32176	-2.57555	-6.53606	0.000141367	0.00072377	1.15539	gb:BM172575 /DB_XREF=gi:17312138 /DB_XREF=imageqc_5_2001sna469bdff41.x1 /CLONE=IMAGE:4969513 /TID=Xl.6774.1 /CNT=5 /FEA=EST /TIER=ConsEnd /STK=3 /UG=Xl.6774 /UG_TITLE=ESTs
Xl.13006.1.A1_at	5.55217	5.82774	5.82774	8.23967	8.05424	8.76234	8.18831	5.73588	8.31114	-2.57526	-10.9554	2.7562e-06	5.76196e-05	5.30007	gb:BJ080449 /DB_XREF=gi:17574159 /DB_XREF=BJ080449 /CLONE=XL075k23 /TID=Xl.13006.1 /CNT=3 /FEA=EST /TIER=ConsEnd /STK=2 /UG=Xl.13006 /UG_TITLE=ESTs, Weakly similar to A34525 hypothetical protein ARSH1 - human (fragment) (H.sapiens)
Xl.3368.1.A1_at	5.33199	5.51511	5.51511	7.88372	8.02178	7.95088	8.25048	5.45407	8.02672	-2.57265	-13.0969	6.57071e-07	2.29369e-05	6.76051	gb:BF025454 /DB_XREF=gi:10755873 /DB_XREF=dg03g02.x1 /CLONE=IMAGE:3747794 /TID=Xl.3368.1 /CNT=11 /FEA=EST /TIER=Stack /STK=9 /UG=Xl.3368 /UG_TITLE=ESTs, Weakly similar to A32469 80K protein H precursor - human (H.sapiens)
Xl.6833.1.S1_at	4.89096	6.01865	6.01865	7.72408	7.16298	8.97702	8.99563	5.64275	8.21492	-2.57217	-4.99417	0.000897563	0.00275187	-0.813637	gb:BJ055529 /DB_XREF=gi:17468210 /DB_XREF=BJ055529 /CLONE=XL009o14 /TID=Xl.6833.1 /CNT=65 /FEA=EST /TIER=Stack /STK=28 /UG=Xl.6833 /UG_TITLE=ESTs, Moderately similar to HSPC038 protein (Homo sapiens) (H.sapiens)
Xl.8386.2.A1_a_at	5.00636	4.95602	4.95602	7.39371	6.75705	8.28098	7.74558	4.9728	7.54433	-2.57153	-7.53651	4.97516e-05	0.00037152	2.26606	gb:BM190775 /DB_XREF=gi:17526726 /DB_XREF=daj30g01.x1 /CLONE=IMAGE:5078184 /TID=Xl.8386.2 /CNT=15 /FEA=EST /TIER=Stack /STK=6 /UG=Xl.8386 /UG_TITLE=Xenopus laevis, Similar to arginyl aminopeptidase (aminopeptidase B)-like 1, clone IMAGE:4930685, mRNA, partial cds
Xl.14890.1.A1_at	4.04208	4.52996	4.52996	7.07496	6.68059	7.73881	6.25425	4.36733	6.93715	-2.56982	-7.26693	6.52208e-05	0.000440624	1.97855	gb:BM180548 /DB_XREF=gi:17404619 /DB_XREF=daj36f01.x1 /CLONE=IMAGE:5078544 /TID=Xl.14890.1 /CNT=2 /FEA=EST /TIER=ConsEnd /STK=1 /UG=Xl.14890 /UG_TITLE=ESTs
Xl.268.1.S1_at	5.33022	6.55426	6.55426	7.28693	8.41716	9.28941	9.86094	6.14625	8.71361	-2.56736	-4.27454	0.00238212	0.00604076	-1.84856	gb:AF044080.1 /DB_XREF=gi:2852393 /TID=Xl.268.1 /CNT=9 /FEA=FLmRNA /TIER=FL /STK=2 /UG=Xl.268 /DEF=Xenopus laevis retinoid X receptor-interacting coactivator xSRC-3 mRNA, complete cds. /PROD=retinoid X receptor-interacting coactivatorxSRC-3 /FL=gb:AF044080.1
Xl.25988.1.A1_at	3.06606	3.7754	3.7754	4.06274	7.19287	7.21176	5.95768	3.53895	6.10626	-2.56731	-3.59449	0.00641824	0.0136053	-2.89006	gb:CD363050 /DB_XREF=gi:31134461 /DB_XREF=AGENCOURT_14235431 /CLONE=IMAGE:6956289 /TID=Xl.25988.1 /CNT=5 /FEA=EST /TIER=ConsEnd /STK=1 /UG=Xl.25988 /UG_TITLE=ESTs, Weakly similar to I52996 transforming growth factor beta-induced protein BIGH3 precursor - human (H.sapiens)
Xl.4683.1.S1_at	4.97979	6.38587	6.38587	8.52981	8.54861	8.64361	8.21402	5.91717	8.48401	-2.56684	-7.12202	7.5676e-05	0.000482035	1.82051	gb:BG513637 /DB_XREF=gi:13484294 /DB_XREF=dac16g02.x2 /CLONE=IMAGE:4407339 /TID=Xl.4683.1 /CNT=8 /FEA=EST /TIER=ConsEnd /STK=1 /UG=Xl.4683 /UG_TITLE=ESTs, Weakly similar to T17302 hypothetical protein DKFZp564D177.1 - human (fragment) (H.sapiens)
Xl.24242.1.A1_at	4.89096	5.38469	5.38469	7.47069	7.47915	8.61358	7.58438	5.22011	7.78695	-2.56684	-7.8701	3.59503e-05	0.000302483	2.61055	gb:BJ045552 /DB_XREF=gi:17369603 /DB_XREF=BJ045552 /CLONE=XL004i15 /TID=Xl.24242.1 /CNT=3 /FEA=EST /TIER=ConsEnd /STK=1 /UG=Xl.24242 /UG_TITLE=ESTs, Weakly similar to TdT binding protein; novel protein similar to synaptotagmin 1 (SYT1, P65) (isoform 1) (Homo sapiens) (H.sapiens)
Xl.5951.1.A1_x_at	3.71522	3.88571	3.88571	6.99564	6.7847	5.76686	6.02708	3.82888	6.39357	-2.56469	-7.91423	3.44656e-05	0.000294084	2.65523	gb:BF232549 /DB_XREF=gi:11175304 /DB_XREF=de07d09.x1 /CLONE=IMAGE:3437248 /TID=Xl.5951.1 /CNT=7 /FEA=EST /TIER=Stack /STK=6 /UG=Xl.5951 /UG_TITLE=ESTs, Moderately similar to A37157 3-methyl-2-oxobutanoate dehydrogenase (lipoamide) (EC 1.2.4.4) E1-beta chain precursor - human (H.sapiens)
Xl.12883.2.A1_at	4.13145	4.33313	4.33313	5.36508	7.51738	6.91418	7.5067	4.2659	6.82583	-2.55993	-5.15825	0.000726079	0.00234637	-0.588097	gb:BJ050283 /DB_XREF=gi:17388699 /DB_XREF=BJ050283 /CLONE=XL023n17 /TID=Xl.12883.2 /CNT=3 /FEA=EST /TIER=ConsEnd /STK=2 /UG=Xl.12883 /UG_TITLE=ESTs
Xl.21984.1.S1_at	4.23268	3.64115	3.64115	6.69203	6.19505	6.22937	6.47485	3.83832	6.39782	-2.5595	-10.5337	3.76338e-06	6.98262e-05	4.97813	gb:BC045088.1 /DB_XREF=gi:27924362 /TID=Xl.21984.1 /CNT=6 /FEA=FLmRNA /TIER=FL /STK=1 /UG=Xl.21984 /DEF=Xenopus laevis, Similar to kraken-like, clone MGC:53864 IMAGE:5542951, mRNA, complete cds. /PROD=Similar to kraken-like /FL=gb:BC045088.1
Xl.3052.1.S1_at	5.73974	5.15901	5.15901	8.14225	7.34778	7.65461	8.50307	5.35259	7.91193	-2.55934	-8.03096	3.08547e-05	0.00027113	2.77239	gb:BJ087574 /DB_XREF=gi:17584469 /DB_XREF=BJ087574 /CLONE=XL056o02 /TID=Xl.3052.1 /CNT=24 /FEA=EST /TIER=Stack /STK=6 /UG=Xl.3052 /UG_TITLE=ESTs, Weakly similar to T46385 hypothetical protein DKFZp434K031.1 - human (fragment) (H.sapiens)
Xl.4188.1.A1_at	4.44875	4.44402	4.44402	6.73922	6.76686	7.09466	7.41683	4.44559	7.00439	-2.5588	-11.134	2.42318e-06	5.2411e-05	5.43273	gb:BF047485 /DB_XREF=gi:10765988 /DB_XREF=dc88b08.x1 /CLONE=IMAGE:3404151 /TID=Xl.4188.1 /CNT=3 /FEA=EST /TIER=ConsEnd /STK=1 /UG=Xl.4188 /UG_TITLE=ESTs
Xl.2747.1.S2_a_at	7.63408	7.43371	7.43371	9.62552	9.78128	10.2597	10.5608	7.5005	10.0568	-2.55632	-9.52389	8.3116e-06	0.000114734	4.15313	gb:BQ385942 /DB_XREF=gi:21073629 /DB_XREF=NISC_mn15c07.x1 /CLONE=IMAGE:5073420 /TID=Xl.2747.1 /CNT=18 /FEA=FLmRNA /TIER=ConsEnd /STK=0 /UG=Xl.2747 /UG_TITLE=Xnf7-O=nuclear factor 7 (Xenopus laevis, oocytes, mRNA, 2343 nt) /FL=gb:BC047956.1
Xl.6032.1.S1_at	7.9484	6.15661	6.15661	9.22147	9.5058	8.66467	9.84589	6.75387	9.30945	-2.55558	-5.3161	0.000594238	0.00202097	-0.374791	gb:BC043806.1 /DB_XREF=gi:27694750 /TID=Xl.6032.1 /CNT=37 /FEA=FLmRNA /TIER=FL+Stack /STK=10 /UG=Xl.6032 /DEF=Xenopus laevis, Similar to prohibitin, clone MGC:53103 IMAGE:5542376, mRNA, complete cds. /PROD=Similar to prohibitin /FL=gb:BC043806.1
Xl.22040.1.A1_at	6.65705	7.78721	7.78721	9.64914	10.1599	10.0098	10.0454	7.41049	9.96604	-2.55556	-8.05773	3.00871e-05	0.000266423	2.79905	gb:CD362754 /DB_XREF=gi:31134165 /DB_XREF=AGENCOURT_14234813 /CLONE=IMAGE:6956488 /TID=Xl.22040.1 /CNT=27 /FEA=EST /TIER=Stack /STK=10 /UG=Xl.22040 /UG_TITLE=ESTs, Weakly similar to ring finger protein 10; KIAA0262 gene product (Homo sapiens) (H.sapiens)
Xl.7659.1.A1_at	4.26734	2.86681	2.86681	6.32621	5.76456	5.01585	6.44635	3.33365	5.88824	-2.55459	-5.57178	0.000432727	0.0015924	-0.0369309	gb:BM179304 /DB_XREF=gi:17403375 /DB_XREF=dai41h08.x1 /CLONE=IMAGE:4964582 /TID=Xl.7659.1 /CNT=13 /FEA=EST /TIER=ConsEnd /STK=1 /UG=Xl.7659 /UG_TITLE=ESTs, Weakly similar to SSF2_HUMAN Sperm-specific antigen 2 (Cleavage signal-1 protein) (CS-1) (H.sapiens)
Xl.4217.1.A1_at	4.67809	3.15648	3.15648	6.26284	6.20384	6.09413	6.30263	3.66368	6.21586	-2.55218	-6.82262	0.000103638	0.000589761	1.48598	gb:BI350208 /DB_XREF=gi:15044654 /DB_XREF=dac64g08.x1 /CLONE=IMAGE:4434999 /TID=Xl.4217.1 /CNT=4 /FEA=EST /TIER=ConsEnd /STK=1 /UG=Xl.4217 /UG_TITLE=ESTs, Moderately similar to acetyl-CoA synthetase, isoform a; cytoplasmic acetyl-coenzyme A synthetase; acetate-CoA ligase; acyl-activating enzyme; acetate thiokinase (Homo sapiens) (H.sapiens)
Xl.3956.1.S1_at	4.17929	3.67824	3.67824	6.33492	6.36435	6.19566	6.68485	3.84525	6.39494	-2.54969	-11.1626	2.37405e-06	5.17158e-05	5.45381	gb:BJ097406 /DB_XREF=gi:17598745 /DB_XREF=BJ097406 /CLONE=XL141j08 /TID=Xl.3956.1 /CNT=10 /FEA=EST /TIER=ConsEnd /STK=5 /UG=Xl.3956 /UG_TITLE=ESTs, Weakly similar to hypothetical protein TCBAP0758 (Homo sapiens) (H.sapiens)
Xl.20195.1.A1_at	4.44875	5.00048	5.00048	7.12804	7.31567	6.97316	8.04373	4.81657	7.36515	-2.54859	-8.39442	2.20368e-05	0.00022008	3.12815	gb:CD328387 /DB_XREF=gi:31092718 /DB_XREF=AGENCOURT_14149871 /CLONE=IMAGE:6949798 /TID=Xl.20195.1 /CNT=2 /FEA=EST /TIER=ConsEnd /STK=1 /UG=Xl.20195 /UG_TITLE=ESTs
Xl.4170.2.A1_at	3.92754	3.15648	3.15648	5.80162	6.03942	5.80162	6.2044	3.4135	5.96177	-2.54827	-9.83535	6.46157e-06	9.86851e-05	4.41616	gb:BQ398301 /DB_XREF=gi:21085988 /DB_XREF=NISC_mo06c10.x1 /CLONE=IMAGE:5162491 /TID=Xl.4170.2 /CNT=11 /FEA=EST /TIER=Stack /STK=6 /UG=Xl.4170 /UG_TITLE=Xenopus laevis clone S10-10-F1 mRNA sequence
Xl.6437.1.A1_at	6.90208	7.15117	7.15117	9.59406	9.44548	10.1666	9.25733	7.06814	9.61587	-2.54773	-9.88326	6.21988e-06	9.6404e-05	4.45592	gb:BF615627 /DB_XREF=gi:11789416 /DB_XREF=de84b07.x1 /CLONE=IMAGE:3548125 /TID=Xl.6437.1 /CNT=2 /FEA=EST /TIER=ConsEnd /STK=2 /UG=Xl.6437 /UG_TITLE=ESTs
Xl.16389.2.S1_at	2.87078	3.31827	3.31827	5.68149	6.22752	5.29098	5.66412	3.1691	5.71603	-2.54692	-9.50781	8.42194e-06	0.000115772	4.13933	gb:BJ085536 /DB_XREF=gi:17581563 /DB_XREF=BJ085536 /CLONE=XL106d16 /TID=Xl.16389.2 /CNT=8 /FEA=EST /TIER=ConsEnd /STK=2 /UG=Xl.16389 /UG_TITLE=ESTs, Moderately similar to GK001 protein (Homo sapiens) (H.sapiens)
Xl.6360.1.S1_at	3.62413	3.8102	3.8102	6.46472	6.04308	6.48635	6.17903	3.74818	6.2933	-2.54512	-12.2468	1.12973e-06	3.29878e-05	6.21308	gb:BC044993.1 /DB_XREF=gi:27924330 /TID=Xl.6360.1 /CNT=23 /FEA=FLmRNA /TIER=FL+Stack /STK=7 /UG=Xl.6360 /DEF=Xenopus laevis, Similar to peptidylprolyl isomerase (cyclophilin)-like 2, clone MGC:53046 IMAGE:5537453, mRNA, complete cds. /PROD=Similar to peptidylprolyl isomerase(cyclophilin)-like 2 /FL=gb:BC044993.1
Xl.1718.1.S1_at	3.12521	5.21016	5.21016	7.22586	7.13629	6.7925	7.08468	4.51517	7.05983	-2.54466	-5.20606	0.000683067	0.002244	-0.523105	gb:BC047261.1 /DB_XREF=gi:28703812 /TID=Xl.1718.1 /CNT=27 /FEA=FLmRNA /TIER=FL+Stack /STK=6 /UG=Xl.1718 /DEF=Xenopus laevis, Similar to succinate dehydrogenase complex, subunit A, flavoprotein (Fp), clone MGC:53323 IMAGE:5570664, mRNA, complete cds. /PROD=Similar to succinate dehydrogenase complex,subunit A, flavoprotein (Fp) /FL=gb:BC047261.1
Xl.3645.1.S1_at	9.3942	9.21531	9.21531	12.7036	12.4753	10.6354	11.4585	9.27494	11.8182	-2.54326	-5.39184	0.000540442	0.00188318	-0.273734	gb:CB591078 /DB_XREF=gi:29508934 /DB_XREF=AGENCOURT_12925563 /CLONE=IMAGE:6899672 /TID=Xl.3645.1 /CNT=5 /FEA=EST /TIER=ConsEnd /STK=0 /UG=Xl.3645 /UG_TITLE=ESTs, Weakly similar to UCRQ_HUMAN Ubiquinol-cytochrome C reductase complex ubiquinone-binding protein QP-C (Ubiquinol-cytochrome C reductase complex 9.5 kDa protein) (Complex III subunit VII) (H.sapiens)
Xl.23730.1.S1_at	5.9487	5.05607	5.05607	8.13219	7.72174	8.12076	7.59901	5.35361	7.89342	-2.53981	-8.76732	1.57905e-05	0.000174723	3.47954	gb:BJ054797 /DB_XREF=gi:17423121 /DB_XREF=BJ054797 /CLONE=XL046g18 /TID=Xl.23730.1 /CNT=9 /FEA=EST /TIER=ConsEnd /STK=3 /UG=Xl.23730 /UG_TITLE=ESTs, Moderately similar to APG5_HUMAN Autophagy protein 5-like (APG5-like) (Apoptosis-specific protein) (H.sapiens)
Xl.25357.1.A1_at	5.74784	5.35743	5.35743	7.94984	8.10649	7.65252	8.39285	5.48757	8.02542	-2.53786	-10.4894	3.89095e-06	7.1845e-05	4.94359	gb:AW782877 /DB_XREF=gi:7797483 /DB_XREF=db24g09.x1 /CLONE=XENOPUS_SOURCE_ID: /TID=Xl.25357.1 /CNT=5 /FEA=EST /TIER=ConsEnd /STK=2 /UG=Xl.25357 /UG_TITLE=ESTs, Weakly similar to A55274 3-oxo-5alpha-steroid 4-dehydrogenase (EC 1.3.99.5) - human (H.sapiens)
Xl.3805.1.S1_at	6.27952	6.33568	6.33568	7.99003	8.94538	8.57238	9.90881	6.31696	8.85415	-2.53719	-6.2239	0.000200468	0.000930255	0.78319	gb:BC041751.1 /DB_XREF=gi:27695189 /TID=Xl.3805.1 /CNT=18 /FEA=mRNA /TIER=ConsEnd /STK=0 /UG=Xl.3805 /UG_TITLE=Xenopus laevis, clone IMAGE:4683785, mRNA /DEF=Xenopus laevis, clone IMAGE:4683785, mRNA.
Xl.3095.1.A1_at	5.88473	5.26581	5.26581	8.12109	7.91131	8.08104	7.91151	5.47212	8.00624	-2.53412	-11.1204	2.44686e-06	5.28236e-05	5.42272	gb:BG021284 /DB_XREF=gi:12477363 /DB_XREF=dg15f04.x1 /CLONE=IMAGE:3749118 /TID=Xl.3095.1 /CNT=3 /FEA=EST /TIER=ConsEnd /STK=1 /UG=Xl.3095 /UG_TITLE=ESTs
Xl.5389.1.S1_at	6.72713	7.30017	7.30017	9.682	8.43755	10.1509	10.3018	7.10916	9.64306	-2.5339	-5.73943	0.000353173	0.00138201	0.179566	gb:BC046262.1 /DB_XREF=gi:28374366 /TID=Xl.5389.1 /CNT=121 /FEA=FLmRNA /TIER=FL+Stack /STK=46 /UG=Xl.5389 /DEF=Xenopus laevis, Similar to Heat shock cognate protein 70, clone MGC:53952 IMAGE:5570547, mRNA, complete cds. /PROD=Similar to Heat shock cognate protein 70 /FL=gb:U55176.1 gb:BC046262.1 gb:U55070.1
Xl.19222.2.A1_at	4.94603	5.29568	5.29568	7.66955	8.08021	7.37535	7.72271	5.17913	7.71196	-2.53283	-10.8295	3.0213e-06	6.11337e-05	5.2053	gb:AW766977 /DB_XREF=gi:7698907 /DB_XREF=da67e07.x1 /CLONE=IMAGE:3200004 /TID=Xl.19222.2 /CNT=18 /FEA=EST /TIER=Stack /STK=13 /UG=Xl.19222 /UG_TITLE=Xenopus laevis, Similar to arsenate resistance protein 2, clone IMAGE:5542042, mRNA, partial cds
Xl.691.2.A1_x_at	4.67809	4.62657	4.62657	7.60665	7.7144	7.66326	5.71801	4.64375	7.17558	-2.53183	-5.30636	0.000601575	0.00203988	-0.387858	gb:BJ077282 /DB_XREF=gi:17522198 /DB_XREF=BJ077282 /CLONE=XL060h17 /TID=Xl.691.2 /CNT=12 /FEA=EST /TIER=Stack /STK=8 /UG=Xl.691 /UG_TITLE=X.laevis cytoskeletal protein 4.1 mRNA, complete cds
Xl.21422.1.S1_at	5.21974	5.97714	5.97714	8.50519	8.70851	8.17931	7.63174	5.72467	8.25619	-2.53152	-7.85592	3.6442e-05	0.000305285	2.59617	gb:CB561021 /DB_XREF=gi:29480551 /DB_XREF=AGENCOURT_13321620 /CLONE=IMAGE:6878272 /TID=Xl.21422.1 /CNT=68 /FEA=mRNA /TIER=Stack /STK=9 /UG=Xl.21422 /UG_TITLE=Xenopus laevis, similar to phosphorylase phosphatase, clone IMAGE:4683726, mRNA, partial cds
Xl.24164.2.S1_a_at	4.18219	4.55684	4.55684	7.47846	6.14079	7.26539	6.96889	4.43196	6.96338	-2.53142	-7.65038	4.44738e-05	0.000343897	2.38503	gb:CD255809 /DB_XREF=gi:31016275 /DB_XREF=AGENCOURT_14157035 /CLONE=IMAGE:6954688 /TID=Xl.24164.2 /CNT=2 /FEA=EST /TIER=ConsEnd /STK=0 /UG=Xl.24164 /UG_TITLE=ESTs, Weakly similar to A Chain A, Glutathione Transferase From Homo Sapiens (H.sapiens)
Xl.21885.1.S1_at	3.40603	2.53723	2.53723	6.24744	5.55886	3.78242	5.8421	2.82683	5.3577	-2.53087	-4.53695	0.00165417	0.00447751	-1.46267	gb:BC043911.1 /DB_XREF=gi:27881796 /TID=Xl.21885.1 /CNT=4 /FEA=FLmRNA /TIER=FL /STK=1 /UG=Xl.21885 /DEF=Xenopus laevis, Similar to RIKEN cDNA 5730466C23 gene, clone MGC:53910 IMAGE:5543650, mRNA, complete cds. /PROD=Similar to RIKEN cDNA 5730466C23 gene /FL=gb:BC043911.1
Xl.16385.1.S1_at	7.71812	7.7189	7.7189	10.3643	10.7743	10.031	9.82481	7.71864	10.2486	-2.52996	-9.74362	6.95398e-06	0.000102921	4.33952	gb:BJ045474 /DB_XREF=gi:17420615 /DB_XREF=BJ045474 /CLONE=XL004e18 /TID=Xl.16385.1 /CNT=13 /FEA=EST /TIER=ConsEnd /STK=4 /UG=Xl.16385 /UG_TITLE=ESTs, Moderately similar to SH3 domain binding glutamic acid-rich protein like 2 (Homo sapiens) (H.sapiens)
Xl.8448.1.S1_at	6.82907	6.37109	6.37109	8.9921	8.56332	9.07709	9.57084	6.52375	9.05084	-2.52709	-9.12188	1.16247e-05	0.000144216	3.80155	gb:BG514381 /DB_XREF=gi:13485038 /DB_XREF=dae05g12.x1 /CLONE=IMAGE:4633534 /TID=Xl.8448.1 /CNT=22 /FEA=EST /TIER=ConsEnd /STK=2 /UG=Xl.8448 /UG_TITLE=ESTs, Weakly similar to putative intramembrane cleaving protease (Homo sapiens) (H.sapiens)
Xl.25401.1.A1_at	3.51932	3.15648	3.15648	6.09504	5.69693	6.08336	5.33125	3.27742	5.80164	-2.52422	-9.88103	6.23089e-06	9.64445e-05	4.45407	gb:BE026836 /DB_XREF=gi:8320197 /DB_XREF=db32b07.x1 /CLONE=XENOPUS_SOURCE_ID: /TID=Xl.25401.1 /CNT=1 /FEA=EST /TIER=ConsEnd /STK=1 /UG=Xl.25401 /UG_TITLE=ESTs, Weakly similar to hypothetical protein similar to mouse Dnajl1 (Homo sapiens) (H.sapiens)
Xl.18129.1.A1_at	5.05186	4.56598	4.56598	7.08308	6.57161	7.55612	7.79548	4.72794	7.25157	-2.52363	-7.85278	3.65521e-05	0.000305754	2.59297	gb:BI068189 /DB_XREF=gi:14485992 /DB_XREF=db98h01.x2 /CLONE=IMAGE:3381073 /TID=Xl.18129.1 /CNT=3 /FEA=EST /TIER=ConsEnd /STK=1 /UG=Xl.18129 /UG_TITLE=ESTs, Weakly similar to S52796 prpL2 protein - human (fragment) (H.sapiens)
Xl.19500.1.A1_at	2.25577	2.53723	2.53723	5.09284	4.86239	5.84102	4.06638	2.44341	4.96566	-2.52225	-6.60352	0.00013129	0.000689154	1.23416	gb:BQ386392 /DB_XREF=gi:21074079 /DB_XREF=NISC_mn17h12.x1 /CLONE=IMAGE:5074030 /TID=Xl.19500.1 /CNT=3 /FEA=EST /TIER=ConsEnd /STK=0 /UG=Xl.19500 /UG_TITLE=ESTs, Moderately similar to ZW10_HUMAN Centromerekinetochore protein zw10 homolog (H.sapiens)
Xl.23803.1.S1_at	3.96306	4.35647	4.35647	6.89047	6.34708	6.2044	7.54663	4.22533	6.74714	-2.52181	-7.41239	5.6304e-05	0.000403149	2.13472	gb:BE026686 /DB_XREF=gi:8320047 /DB_XREF=db30a07.x1 /CLONE=XENOPUS_SOURCE_ID: /TID=Xl.23803.1 /CNT=10 /FEA=EST /TIER=ConsEnd /STK=2 /UG=Xl.23803 /UG_TITLE=ESTs, Weakly similar to T2D8_HUMAN Transcription initiation factor TFIID 30 kDa subunit (TAFII-30) (TAFII30) (H.sapiens)
Xl.388.1.S1_at	5.76645	6.38338	6.38338	8.67996	8.60783	9.34909	8.15767	6.17774	8.69864	-2.5209	-8.00256	3.1693e-05	0.000276592	2.74402	gb:U18776.1 /DB_XREF=gi:2408146 /GEN=AES /TID=Xl.388.1 /CNT=46 /FEA=FLmRNA /TIER=FL+Stack /STK=10 /UG=Xl.388 /DEF=Xenopus laevis amino enhancer split (AES) mRNA, complete cds. /PROD=amino enhancer split /FL=gb:U18776.1
Xl.7645.2.S1_x_at	7.84981	7.2254	7.2254	10.1738	9.93974	10.0184	9.67918	7.43354	9.95279	-2.51925	-10.4116	4.1271e-06	7.4062e-05	4.8825	gb:CB565856 /DB_XREF=gi:29485386 /DB_XREF=AGENCOURT_13321128 /CLONE=IMAGE:6872218 /TID=Xl.7645.2 /CNT=36 /FEA=EST /TIER=Stack /STK=11 /UG=Xl.7645 /UG_TITLE=Xenopus laevis, Similar to chaperonin subunit 2 (beta), clone MGC:52772 IMAGE:4684199, mRNA, complete cds
Xl.284.1.S1_a_at	4.44875	5.6256	5.6256	8.03339	7.32509	8.30042	7.34981	5.23332	7.75217	-2.51886	-6.6061	0.000130921	0.00068816	1.23715	gb:BC046650.1 /DB_XREF=gi:28302164 /TID=Xl.284.1 /CNT=8 /FEA=FLmRNA /TIER=FL /STK=3 /UG=Xl.284 /DEF=Xenopus laevis, clone MGC:52570 IMAGE:4888616, mRNA, complete cds. /PROD=Unknown (protein for MGC:52570) /FL=gb:BC046650.1
Xl.6633.1.A1_at	3.65982	3.7754	3.7754	6.60911	4.51628	7.32187	6.56519	3.73687	6.25311	-2.51624	-4.34962	0.00214387	0.00553808	-1.73718	gb:BF071952 /DB_XREF=gi:10848591 /DB_XREF=db48h07.x1 /CLONE=IMAGE:3301789 /TID=Xl.6633.1 /CNT=10 /FEA=EST /TIER=ConsEnd /STK=1 /UG=Xl.6633 /UG_TITLE=ESTs, Weakly similar to zinc finger protein 259; zinc finger protein ZPR1 (Homo sapiens) (H.sapiens)
Xl.4594.1.S2_at	7.65808	6.62451	6.62451	9.55377	9.65695	9.38101	9.34845	6.96903	9.48504	-2.51601	-8.61501	1.80677e-05	0.000192493	3.33763	gb:BC044314.1 /DB_XREF=gi:27882205 /TID=Xl.4594.1 /CNT=85 /FEA=FLmRNA /TIER=FL+Stack /STK=18 /UG=Xl.4594 /DEF=Xenopus laevis, Similar to high density lipoprotein binding protein (vigilin), clone MGC:52662 IMAGE:4681587, mRNA, complete cds. /PROD=Similar to high density lipoprotein bindingprotein (vigilin) /FL=gb:BC044314.1
Xl.2615.1.S1_at	5.33022	4.62657	4.62657	7.00478	7.09797	7.50718	7.88888	4.86112	7.3747	-2.51358	-8.4395	2.11532e-05	0.000214199	3.17135	gb:BG020895 /DB_XREF=gi:12476974 /DB_XREF=df35e05.x1 /CLONE=IMAGE:3580497 /TID=Xl.2615.1 /CNT=2 /FEA=EST /TIER=ConsEnd /STK=1 /UG=Xl.2615 /UG_TITLE=ESTs
Xl.7062.1.A1_at	6.97103	6.18023	6.18023	9.02591	8.81683	9.58857	8.39676	6.44383	8.95702	-2.51319	-7.53083	5.00323e-05	0.000372405	2.26009	gb:BJ090097 /DB_XREF=gi:17588163 /DB_XREF=BJ090097 /CLONE=XL101i11 /TID=Xl.7062.1 /CNT=22 /FEA=EST /TIER=Stack /STK=10 /UG=Xl.7062 /UG_TITLE=ESTs, Moderately similar to SNX4_HUMAN Sorting nexin 4 (H.sapiens)
Xl.19048.1.S1_at	6.64211	6.46328	6.46328	9.09661	8.38535	9.27062	9.37041	6.52289	9.03075	-2.50785	-9.2065	1.08211e-05	0.000136572	3.87672	gb:BJ044392 /DB_XREF=gi:17397883 /DB_XREF=BJ044392 /CLONE=XL013c17 /TID=Xl.19048.1 /CNT=7 /FEA=EST /TIER=ConsEnd /STK=2 /UG=Xl.19048 /UG_TITLE=ESTs
Xl.5914.1.S1_at	6.77464	5.54201	5.54201	9.35899	8.87386	8.19907	7.40721	5.95289	8.45978	-2.50689	-5.01065	0.000878498	0.00271297	-0.790808	gb:BC042350.1 /DB_XREF=gi:27503447 /TID=Xl.5914.1 /CNT=42 /FEA=FLmRNA /TIER=FL+Stack /STK=9 /UG=Xl.5914 /DEF=Xenopus laevis, Similar to nucleolar GTPase, clone MGC:52791 IMAGE:4724672, mRNA, complete cds. /PROD=Similar to nucleolar GTPase /FL=gb:BC042350.1
Xl.24704.1.A1_at	2.87078	2.7814	2.7814	5.24624	5.23588	5.69547	5.09387	2.81119	5.31786	-2.50667	-11.6545	1.68207e-06	4.27401e-05	5.80733	gb:CB565726 /DB_XREF=gi:29485256 /DB_XREF=AGENCOURT_13324830 /CLONE=IMAGE:6874237 /TID=Xl.24704.1 /CNT=4 /FEA=EST /TIER=ConsEnd /STK=2 /UG=Xl.24704 /UG_TITLE=ESTs
Xl.14161.1.A1_at	3.06606	4.1029	4.1029	6.55995	5.60055	6.76439	6.11511	3.75729	6.26	-2.50272	-6.7766	0.000108866	0.000608433	1.43359	gb:BJ075760 /DB_XREF=gi:17520676 /DB_XREF=BJ075760 /CLONE=XL103j04 /TID=Xl.14161.1 /CNT=2 /FEA=EST /TIER=ConsEnd /STK=2 /UG=Xl.14161 /UG_TITLE=ESTs
Xl.2.1.S1_at	9.18847	8.60068	8.60068	11.5334	11.0165	11.2181	11.4271	8.79661	11.2988	-2.50215	-10.3413	4.354e-06	7.65655e-05	4.82697	gb:X06222.1 /DB_XREF=gi:65069 /TID=Xl.2.1 /CNT=25 /FEA=mRNA /TIER=Stack /STK=9 /UG=Xl.2 /UG_TITLE=Xenopus laevis mRNA for ribosomal protein L14a /DEF=Xenopus laevis mRNA for ribosomal protein L14a.
Xl.98.1.S1_at	8.12669	7.92449	7.92449	10.2869	10.4386	10.4724	10.7757	7.99189	10.4934	-2.50149	-12.1573	1.19841e-06	3.44956e-05	6.15311	gb:BC045089.1 /DB_XREF=gi:27924241 /TID=Xl.98.1 /CNT=23 /FEA=FLmRNA /TIER=FL /STK=5 /UG=Xl.98 /DEF=Xenopus laevis, Similar to KIAA0095 gene product, clone MGC:53870 IMAGE:5543002, mRNA, complete cds. /PROD=Similar to KIAA0095 gene product /FL=gb:BC045089.1 gb:U63920.1 gb:U63919.1
Xl.6589.1.S1_at	4.92188	5.16633	5.16633	7.72174	8.1736	7.09506	7.35435	5.08485	7.58619	-2.50134	-8.84725	1.47241e-05	0.000167266	3.55314	gb:BC045043.1 /DB_XREF=gi:27924439 /TID=Xl.6589.1 /CNT=50 /FEA=FLmRNA /TIER=FL+Stack /STK=15 /UG=Xl.6589 /DEF=Xenopus laevis, Similar to actin related protein 23 complex, subunit 1B (41 kDa), clone MGC:53241 IMAGE:5543563, mRNA, complete cds. /PROD=Similar to actin related protein 23 complex,subunit 1B (41 kDa) /FL=gb:BC045043.1
Xl.14806.1.A1_at	5.6815	4.91044	4.91044	7.27832	7.49003	8.47299	7.41808	5.16746	7.66486	-2.4974	-7.18647	7.08139e-05	0.000463946	1.89111	gb:BM179509 /DB_XREF=gi:17403569 /DB_XREF=dai44e11.x1 /CLONE=IMAGE:4964469 /TID=Xl.14806.1 /CNT=1 /FEA=EST /TIER=ConsEnd /STK=1 /UG=Xl.14806 /UG_TITLE=ESTs, Moderately similar to long-chain fatty-acid-Coenzyme A ligase 4, isoform 2; long-chain acyl-CoA synthetase 4; acyl-activating enzyme; fatty acid thiokinase (long-chain); lignoceroyl-CoA synthase (Homo sapiens) (H.sapiens)
Xl.4849.1.A1_at	3.65982	4.78099	4.78099	6.56627	7.20059	7.20507	6.62946	4.40727	6.90035	-2.49308	-7.35324	5.97566e-05	0.000418223	2.07151	gb:BE505717 /DB_XREF=gi:9709248 /DB_XREF=dc35d09.x1 /CLONE=IMAGE:3399089 /TID=Xl.4849.1 /CNT=3 /FEA=EST /TIER=ConsEnd /STK=1 /UG=Xl.4849 /UG_TITLE=ESTs, Weakly similar to A55877 tumor necrosis factor type 1 receptor associated protein TRAP-1 - human (H.sapiens)
Xl.9127.1.A1_at	4.89096	5.54998	5.54998	8.38491	8.27096	7.97593	6.65114	5.33031	7.82074	-2.49043	-5.81092	0.000324238	0.00129858	0.270677	gb:BG346553 /DB_XREF=gi:13166977 /DB_XREF=daa38b10.x1 /CLONE=IMAGE:4058443 /TID=Xl.9127.1 /CNT=2 /FEA=EST /TIER=ConsEnd /STK=1 /UG=Xl.9127 /UG_TITLE=ESTs, Weakly similar to similar to MRJ gene for a member of the DNAJ protein family (H. sapiens); MRJ gene for a member of the DNAJ protein family (Homo sapiens) (H.sapiens)
Xl.2975.1.A1_at	5.46759	5.60052	5.60052	8.8967	8.14964	8.00089	7.13538	5.55621	8.04565	-2.48944	-6.63984	0.000126194	0.000668515	1.27632	gb:BG019655 /DB_XREF=gi:12475734 /DB_XREF=dc78g12.x1 /CLONE=IMAGE:3403223 /TID=Xl.2975.1 /CNT=5 /FEA=EST /TIER=ConsEnd /STK=4 /UG=Xl.2975 /UG_TITLE=ESTs, Highly similar to Crn, crooked neck-like 1 (Drosophila); CGI-201 protein; crooked neck protein (crn); crooked neck protein (crn) (Homo sapiens) (H.sapiens)
Xl.9213.1.A1_at	4.95979	5.16746	5.16746	7.56436	6.73664	7.95919	8.08898	5.09824	7.5873	-2.48906	-7.48445	5.23917e-05	0.000384731	2.21118	gb:BI314233 /DB_XREF=gi:14988560 /DB_XREF=dai33c07.x1 /CLONE=IMAGE:4963572 /TID=Xl.9213.1 /CNT=4 /FEA=EST /TIER=ConsEnd /STK=3 /UG=Xl.9213 /UG_TITLE=ESTs
Xl.26147.1.A1_at	5.93223	6.11079	6.11079	8.95438	8.20057	8.3305	8.66633	6.05127	8.53795	-2.48667	-10.4008	4.161e-06	7.42738e-05	4.87402	gb:BG023146 /DB_XREF=gi:12479225 /DB_XREF=dab12b05.x1 /CLONE=IMAGE:4174040 /TID=Xl.26147.1 /CNT=27 /FEA=mRNA /TIER=Stack /STK=9 /UG=Xl.26147 /UG_TITLE=Xenopus laevis h3 histone mrna
Xl.23732.1.S1_at	6.8279	7.04778	7.04778	9.52833	10.1308	9.21808	8.94291	6.97448	9.45503	-2.48054	-8.37023	2.25279e-05	0.000222279	3.10488	gb:BQ386094 /DB_XREF=gi:21073781 /DB_XREF=NISC_mn16c02.x1 /CLONE=IMAGE:5073411 /TID=Xl.23732.1 /CNT=26 /FEA=EST /TIER=ConsEnd /STK=0 /UG=Xl.23732 /UG_TITLE=ESTs, Moderately similar to JC4392 RT14 protein - human (H.sapiens)
Xl.10406.2.A1_at	6.96778	6.14313	6.14313	8.93911	9.08556	8.62309	8.94352	6.41801	8.89782	-2.47981	-9.3101	9.91991e-06	0.000128635	3.9679	gb:BF072383 /DB_XREF=gi:10849022 /DB_XREF=db56e01.x1 /CLONE=IMAGE:3302520 /TID=Xl.10406.2 /CNT=3 /FEA=EST /TIER=ConsEnd /STK=1 /UG=Xl.10406 /UG_TITLE=ESTs, Moderately similar to pyrophosphatase (inorganic); inorganic pyrophosphatase (Homo sapiens) (H.sapiens)
Xl.18694.1.S1_at	3.15648	3.51528	3.51528	6.1251	6.02023	6.47659	4.87331	3.39568	5.87381	-2.47813	-6.68004	0.000120805	0.000649947	1.3228	gb:BC043744.1 /DB_XREF=gi:27696232 /TID=Xl.18694.1 /CNT=26 /FEA=FLmRNA /TIER=FL /STK=2 /UG=Xl.18694 /DEF=Xenopus laevis, clone MGC:52868 IMAGE:4888087, mRNA, complete cds. /PROD=Unknown (protein for MGC:52868) /FL=gb:BC043744.1
Xl.7031.1.A1_at	5.30846	4.31378	4.31378	6.14469	5.94954	8.35896	8.02768	4.64534	7.12022	-2.47488	-3.91302	0.00400211	0.00920758	-2.39531	gb:BJ084234 /DB_XREF=gi:17579683 /DB_XREF=BJ084234 /CLONE=XL088j08 /TID=Xl.7031.1 /CNT=4 /FEA=EST /TIER=ConsEnd /STK=4 /UG=Xl.7031 /UG_TITLE=ESTs, Weakly similar to hypothetical protein MGC20255 (Homo sapiens) (H.sapiens)
Xl.15494.1.S1_at	6.32672	5.38469	5.38469	8.67371	8.44776	7.1637	8.40845	5.6987	8.17341	-2.47471	-6.01704	0.000254364	0.00109374	0.52939	gb:CA972708 /DB_XREF=gi:27505362 /DB_XREF=AGENCOURT_10765357 /CLONE=IMAGE:6324581 /TID=Xl.15494.1 /CNT=12 /FEA=EST /TIER=ConsEnd /STK=1 /UG=Xl.15494 /UG_TITLE=ESTs, Weakly similar to sirtuin 5, isoform 1; sir2-like 5; sirtuin type 5; sirtuin (silent mating type information regulation 2, S.cerevisiae, homolog) 5; silent mating type information regulation 2, S.cerevisiae, homolog 5 (Homo sapiens) (…
Xl.9629.1.A1_at	5.37088	5.06542	5.06542	7.99173	7.14546	8.09116	7.33265	5.16724	7.64025	-2.47301	-8.63497	1.77496e-05	0.000190339	3.35636	gb:CD329834 /DB_XREF=gi:31094165 /DB_XREF=AGENCOURT_14150471 /CLONE=IMAGE:6951327 /TID=Xl.9629.1 /CNT=5 /FEA=EST /TIER=ConsEnd /STK=4 /UG=Xl.9629 /UG_TITLE=ESTs
Xl.10221.1.A1_at	4.89096	5.16505	5.16505	8.08682	7.91814	6.28032	7.90126	5.07369	7.54663	-2.47294	-5.76295	0.000343356	0.00135747	0.209611	gb:BF428188 /DB_XREF=gi:11439895 /DB_XREF=daa05e12.x1 /CLONE=IMAGE:4055518 /TID=Xl.10221.1 /CNT=3 /FEA=EST /TIER=ConsEnd /STK=1 /UG=Xl.10221 /UG_TITLE=ESTs, Weakly similar to likely ortholog of mouse ubiquitin conjugating enzyme 7 interacting protein 5; KIAA0860 protein (Homo sapiens) (H.sapiens)
Xl.10756.1.A1_at	5.75309	5.31655	5.31655	8.91782	7.87458	7.33631	7.60536	5.46206	7.93352	-2.47146	-6.61422	0.000129766	0.000683341	1.24659	gb:BE508162 /DB_XREF=gi:9727937 /DB_XREF=dc16e11.x1 /CLONE=IMAGE:3397292 /TID=Xl.10756.1 /CNT=3 /FEA=EST /TIER=ConsEnd /STK=2 /UG=Xl.10756 /UG_TITLE=ESTs
Xl.24417.1.A1_at	5.69745	5.15906	5.15906	7.72768	7.67963	7.72591	8.10647	5.33853	7.80992	-2.4714	-10.7051	3.31167e-06	6.43562e-05	5.11047	gb:CB561184 /DB_XREF=gi:29480714 /DB_XREF=AGENCOURT_13327430 /CLONE=IMAGE:6878163 /TID=Xl.24417.1 /CNT=2 /FEA=EST /TIER=ConsEnd /STK=1 /UG=Xl.24417 /UG_TITLE=ESTs
Xl.10194.1.A1_at	6.32672	5.7562	5.7562	8.80779	7.96772	8.15767	8.73512	5.94637	8.41708	-2.4707	-8.58545	1.85504e-05	0.00019564	3.30984	gb:BF428162 /DB_XREF=gi:11439860 /DB_XREF=daa05a09.x1 /CLONE=IMAGE:4055320 /TID=Xl.10194.1 /CNT=4 /FEA=EST /TIER=ConsEnd /STK=1 /UG=Xl.10194 /UG_TITLE=ESTs, Moderately similar to CGI-128 protein (Homo sapiens) (H.sapiens)
Xl.8902.1.S1_at	7.71724	7.52092	7.52092	9.93536	9.8082	10.1115	10.3615	7.58636	10.0541	-2.46778	-11.5769	1.77451e-06	4.39428e-05	5.75257	gb:CB563706 /DB_XREF=gi:29483236 /DB_XREF=AGENCOURT_13346230 /CLONE=IMAGE:6873072 /TID=Xl.8902.1 /CNT=129 /FEA=FLmRNA /TIER=Stack /STK=73 /UG=Xl.8902 /UG_TITLE=Xenopus laevis, similar to translation initiation factor eIF-5A, clone MGC:53096 IMAGE:5542286, mRNA, complete cds /FL=gb:BC045007.1
Xl.4216.1.S1_at	5.69745	6.18023	6.18023	8.9471	8.16738	8.49537	8.33178	6.01931	8.48541	-2.4661	-9.61335	7.72627e-06	0.000109551	4.2295	gb:CA985578 /DB_XREF=gi:27518245 /DB_XREF=AGENCOURT_11066854 /CLONE=IMAGE:6860181 /TID=Xl.4216.1 /CNT=11 /FEA=EST /TIER=ConsEnd /STK=0 /UG=Xl.4216 /UG_TITLE=ESTs, Weakly similar to YB23_HUMAN Hypothetical protein KIAA1223 (H.sapiens)
Xl.690.1.S2_at	2.89858	4.18079	4.18079	6.26644	6.21071	6.3046	6.09286	3.75339	6.21865	-2.46527	-7.46257	5.35467e-05	0.00039146	2.18803	gb:BG810945 /DB_XREF=gi:14182026 /DB_XREF=daf39b08.x1 /CLONE=IMAGE:4740807 /TID=Xl.690.1 /CNT=9 /FEA=FLmRNA /TIER=ConsEnd /STK=0 /UG=Xl.690 /UG_TITLE=Xenopus laevis calciumcalmodulin-dependent protein kinase II delta12 subunit mRNA, complete cds /FL=gb:AF233629.1
Xl.9104.2.A1_at	3.66289	4.32317	4.32317	6.30536	6.84783	6.89085	6.22699	4.10308	6.56776	-2.46468	-8.8711	1.44215e-05	0.000165796	3.57499	gb:CD328123 /DB_XREF=gi:31092454 /DB_XREF=AGENCOURT_14182687 /CLONE=IMAGE:6950792 /TID=Xl.9104.2 /CNT=8 /FEA=EST /TIER=ConsEnd /STK=0 /UG=Xl.9104 /UG_TITLE=ESTs, Moderately similar to SYTC_HUMAN Threonyl-tRNA synthetase, cytoplasmic (Threonine--tRNA ligase) (ThrRS) (H.sapiens)
Xl.23494.1.A1_at	4.18219	3.57148	3.57148	7.17657	5.81711	6.14079	5.81711	3.77505	6.2379	-2.46285	-6.70886	0.000117098	0.000636472	1.35599	gb:BJ047264 /DB_XREF=gi:17372790 /DB_XREF=BJ047264 /CLONE=XL016a16 /TID=Xl.23494.1 /CNT=14 /FEA=EST /TIER=Stack /STK=7 /UG=Xl.23494 /UG_TITLE=ESTs, Moderately similar to B9 protein (Homo sapiens) (H.sapiens)
Xl.16126.1.A1_at	3.40603	2.95372	2.95372	6.20588	7.06634	3.82132	5.16792	3.10449	5.56537	-2.46088	-3.68691	0.00558837	0.012119	-2.74538	gb:BJ085816 /DB_XREF=gi:17581964 /DB_XREF=BJ085816 /CLONE=XL051c09 /TID=Xl.16126.1 /CNT=4 /FEA=EST /TIER=ConsEnd /STK=1 /UG=Xl.16126 /UG_TITLE=ESTs
Xl.6324.1.A1_at	4.93688	6.08655	6.08655	7.57628	7.9465	8.21019	8.92001	5.70333	8.16324	-2.45991	-6.16529	0.000214341	0.000976095	0.711872	gb:CB565569 /DB_XREF=gi:29485099 /DB_XREF=AGENCOURT_13321002 /CLONE=IMAGE:6881427 /TID=Xl.6324.1 /CNT=9 /FEA=EST /TIER=Stack /STK=7 /UG=Xl.6324 /UG_TITLE=ESTs, Weakly similar to S53351 malate dehydrogenase (oxaloacetate-decarboxylating) (NADP+) (EC 1.1.1.40) precursor, mitochondrial - human (H.sapiens)
Xl.3261.1.A1_at	3.98581	3.92206	3.92206	8.19838	5.12304	4.51453	7.77314	3.94331	6.40227	-2.45896	-2.85338	0.0201923	0.0354547	-4.07307	gb:BG022327 /DB_XREF=gi:12478406 /DB_XREF=dab02g04.x1 /CLONE=IMAGE:4173486 /TID=Xl.3261.1 /CNT=2 /FEA=EST /TIER=ConsEnd /STK=1 /UG=Xl.3261 /UG_TITLE=ESTs, Weakly similar to MM19_HUMAN Matrix metalloproteinase-19 precursor (MMP-19) (Matrix metalloproteinase RASI) (MMP-18) (H.sapiens)
Xl.13675.1.A1_at	3.15648	3.26707	3.26707	6.64688	5.07137	5.5438	5.48853	3.23021	5.68765	-2.45744	-6.91885	9.35736e-05	0.000551407	1.5947	gb:BE189321 /DB_XREF=gi:9730739 /DB_XREF=db64b02.x1 /CLONE=IMAGE:3377739 /TID=Xl.13675.1 /CNT=9 /FEA=EST /TIER=ConsEnd /STK=1 /UG=Xl.13675 /UG_TITLE=ESTs, Weakly similar to T42702 hypothetical protein DKFZp434F117.1 - human (fragment) (H.sapiens)
Xl.20555.1.S1_at	4.72976	4.03139	4.03139	5.78652	6.30263	6.693	8.1034	4.26418	6.72139	-2.45721	-4.83441	0.00110748	0.00325139	-1.03699	gb:BC044068.1 /DB_XREF=gi:28277245 /TID=Xl.20555.1 /CNT=108 /FEA=FLmRNA /TIER=FL+Stack /STK=20 /UG=Xl.20555 /DEF=Xenopus laevis, Similar to calreticulin, clone MGC:52637 IMAGE:4681380, mRNA, complete cds. /PROD=Similar to calreticulin /FL=gb:BC044068.1
Xl.4334.1.S1_at	3.40603	2.7814	2.7814	5.24624	5.39842	5.92731	5.21328	2.98961	5.44631	-2.4567	-9.13414	1.15043e-05	0.00014346	3.81248	gb:BC045026.1 /DB_XREF=gi:28277296 /TID=Xl.4334.1 /CNT=47 /FEA=FLmRNA /TIER=FL+Stack /STK=11 /UG=Xl.4334 /DEF=Xenopus laevis, Similar to RNA cyclase homolog, clone MGC:53171 IMAGE:5542935, mRNA, complete cds. /PROD=Similar to RNA cyclase homolog /FL=gb:BC045026.1
Xl.6307.1.S1_at	6.20558	5.10604	5.10604	8.09136	7.8683	7.78122	7.97137	5.47255	7.92806	-2.45551	-8.13693	2.79361e-05	0.000254842	2.87751	gb:BC041244.1 /DB_XREF=gi:27370993 /TID=Xl.6307.1 /CNT=69 /FEA=FLmRNA /TIER=FL+Stack /STK=23 /UG=Xl.6307 /DEF=Xenopus laevis, Similar to B-cell translocation gene 1, clone MGC:52780 IMAGE:4684255, mRNA, complete cds. /PROD=Similar to B-cell translocation gene 1 /FL=gb:BC041244.1
Xl.5442.1.A1_at	3.47827	3.62058	3.62058	5.79777	5.28635	6.17577	6.84836	3.57314	6.02706	-2.45392	-7.01927	8.42051e-05	0.000516611	1.70693	gb:BG161630 /DB_XREF=gi:12695639 /DB_XREF=dab73h03.x1 /CLONE=IMAGE:4202741 /TID=Xl.5442.1 /CNT=4 /FEA=EST /TIER=ConsEnd /STK=3 /UG=Xl.5442 /UG_TITLE=ESTs, Weakly similar to succinate-CoA ligase, ADP-forming, beta subunit; SCS-betaA for ATP specific succinyl CoA synthetase beta subunit precursor (Homo sapiens) (H.sapiens)
Xl.16022.1.A1_at	2.39379	2.723	2.723	5.39995	5.14488	4.918	4.79635	2.61326	5.0648	-2.45154	-10.8123	3.05979e-06	6.13346e-05	5.19222	gb:BJ080477 /DB_XREF=gi:17574208 /DB_XREF=BJ080477 /CLONE=XL075n10 /TID=Xl.16022.1 /CNT=2 /FEA=EST /TIER=ConsEnd /STK=2 /UG=Xl.16022 /UG_TITLE=ESTs
Xl.15334.1.A1_at	2.77435	3.26707	3.26707	5.22795	5.90579	5.53894	5.54115	3.10283	5.55346	-2.45063	-10.1031	5.23223e-06	8.72165e-05	4.63602	gb:BJ045400 /DB_XREF=gi:17420541 /DB_XREF=BJ045400 /CLONE=XL004a23 /TID=Xl.15334.1 /CNT=3 /FEA=EST /TIER=ConsEnd /STK=2 /UG=Xl.15334 /UG_TITLE=ESTs
Xl.15234.1.A1_at	4.83246	5.06444	5.06444	7.70696	7.99469	6.84324	7.20473	4.98711	7.4374	-2.45029	-8.22425	2.57597e-05	0.000241067	2.96326	gb:BJ090303 /DB_XREF=gi:17588454 /DB_XREF=BJ090303 /CLONE=XL107h11 /TID=Xl.15234.1 /CNT=4 /FEA=EST /TIER=ConsEnd /STK=1 /UG=Xl.15234 /UG_TITLE=ESTs, Weakly similar to synaptic nuclei expressed gene 2 (Homo sapiens) (H.sapiens)
Xl.1465.1.S1_s_at	5.24879	4.44402	4.44402	7.55399	5.57141	8.20048	7.32316	4.71227	7.16226	-2.44998	-4.31221	0.0022592	0.0057801	-1.79257	gb:BC046253.1 /DB_XREF=gi:28374174 /TID=Xl.1465.1 /CNT=7 /FEA=mRNA /TIER=ConsEnd /STK=2 /UG=Xl.1465 /UG_TITLE=Xenopus laevis, Similar to hypothetical protein MGC31194, clone IMAGE:5572754, mRNA /DEF=Xenopus laevis, Similar to hypothetical protein MGC31194, clone IMAGE:5572754, mRNA.
Xl.7710.1.S1_at	6.64487	6.46963	6.46963	9.15993	9.46838	9.10989	8.17168	6.52804	8.97747	-2.44943	-7.82058	3.77008e-05	0.000310612	2.56019	gb:BG884851 /DB_XREF=gi:14261943 /DB_XREF=dac31e08.x1 /CLONE=IMAGE:4408790 /TID=Xl.7710.1 /CNT=23 /FEA=EST /TIER=ConsEnd /STK=1 /UG=Xl.7710 /UG_TITLE=ESTs, Moderately similar to HCD2_HUMAN 3-hydroxyacyl-CoA dehydrogenase type II (Type II HADH) (Endoplasmic reticulum-associated amyloid beta-peptide binding protein) (Short-chain type dehydrogenasereductase XH98G2) (H.sapiens)
Xl.1354.1.A1_at	5.34086	5.83257	5.83257	7.96562	8.27475	7.58725	8.64384	5.66867	8.11787	-2.4492	-8.41608	2.16072e-05	0.000217328	3.14893	gb:BG514461 /DB_XREF=gi:13485118 /DB_XREF=dae01d06.x1 /CLONE=IMAGE:4632994 /TID=Xl.1354.1 /CNT=8 /FEA=EST /TIER=ConsEnd /STK=3 /UG=Xl.1354 /UG_TITLE=ESTs, Weakly similar to T13616 hypothetical protein 8D8.8 - fruit fly (Drosophila melanogaster) (D.melanogaster)
Xl.18307.1.A1_at	5.33188	5.79313	5.79313	8.59875	8.32006	7.92716	7.50785	5.63938	8.08846	-2.44908	-8.24357	2.53041e-05	0.000238881	2.98212	gb:BI314297 /DB_XREF=gi:14988624 /DB_XREF=dai34c04.x1 /CLONE=IMAGE:4963567 /TID=Xl.18307.1 /CNT=2 /FEA=EST /TIER=ConsEnd /STK=2 /UG=Xl.18307 /UG_TITLE=ESTs
Xl.5306.1.S1_at	7.59923	6.59516	6.59516	9.74835	9.3502	9.52103	8.89553	6.92985	9.37878	-2.44893	-7.55368	4.89134e-05	0.000365974	2.28409	gb:CA974519 /DB_XREF=gi:27507173 /DB_XREF=AGENCOURT_10747827 /CLONE=IMAGE:6327145 /TID=Xl.5306.1 /CNT=64 /FEA=EST /TIER=Stack /STK=20 /UG=Xl.5306 /UG_TITLE=ESTs, Weakly similar to CTA2_HUMAN Contactin associated protein-like 2 precursor (Cell recognition molecule Caspr2) (H.sapiens)
Xl.6796.1.A1_at	8.06197	7.66244	7.66244	10.1753	10.2336	9.8702	10.6983	7.79562	10.2444	-2.44875	-9.73108	7.02446e-06	0.000103258	4.32899	gb:BF071818 /DB_XREF=gi:10848457 /DB_XREF=db46g04.x1 /CLONE=IMAGE:3301590 /TID=Xl.6796.1 /CNT=4 /FEA=EST /TIER=ConsEnd /STK=3 /UG=Xl.6796 /UG_TITLE=ESTs
Xl.24229.1.S1_at	7.02454	6.38338	6.38338	9.50222	9.41718	8.68046	8.58343	6.5971	9.04582	-2.44872	-7.80197	3.83826e-05	0.000314554	2.54119	gb:CB564939 /DB_XREF=gi:29484469 /DB_XREF=AGENCOURT_13319042 /CLONE=IMAGE:6873238 /TID=Xl.24229.1 /CNT=5 /FEA=EST /TIER=ConsEnd /STK=1 /UG=Xl.24229 /UG_TITLE=ESTs, Weakly similar to zinc finger protein LOC51042 (Homo sapiens) (H.sapiens)
Xl.1322.1.A1_at	4.40788	4.08474	4.08474	6.66847	5.81843	7.25567	6.82029	4.19245	6.64072	-2.44826	-7.3297	6.11954e-05	0.000424592	2.04624	gb:BJ090782 /DB_XREF=gi:17589141 /DB_XREF=BJ090782 /CLONE=XL110b09 /TID=Xl.1322.1 /CNT=16 /FEA=EST /TIER=Stack /STK=8 /UG=Xl.1322 /UG_TITLE=ESTs, Highly similar to RAP3_HUMAN RAS-RELATED PROTEIN RAP-2B (H.sapiens)
Xl.14967.1.A1_at	5.89015	6.03613	6.03613	8.71995	8.31337	8.51504	8.19191	5.98747	8.43507	-2.4476	-11.6819	1.65075e-06	4.22247e-05	5.82655	gb:BJ052331 /DB_XREF=gi:17496401 /DB_XREF=BJ052331 /CLONE=XL041c14 /TID=Xl.14967.1 /CNT=2 /FEA=EST /TIER=ConsEnd /STK=2 /UG=Xl.14967 /UG_TITLE=ESTs, Weakly similar to I55595 splicing factor - human (H.sapiens)
Xl.21895.1.S1_at	6.46148	5.6256	5.6256	9.46275	8.63282	8.81087	6.49773	5.90423	8.35104	-2.44682	-3.83976	0.00445585	0.0100212	-2.50809	gb:BC044005.1 /DB_XREF=gi:27697090 /TID=Xl.21895.1 /CNT=8 /FEA=FLmRNA /TIER=FL /STK=2 /UG=Xl.21895 /DEF=Xenopus laevis, Similar to mitochondrial ribosomal protein L43, clone MGC:54002 IMAGE:5571313, mRNA, complete cds. /PROD=Similar to mitochondrial ribosomal protein L43 /FL=gb:BC044005.1
Xl.18460.1.A1_at	4.95255	5.12989	5.12989	7.40624	7.45552	7.63722	7.57054	5.07077	7.51738	-2.44661	-12.9799	7.0658e-07	2.40803e-05	6.68749	gb:AW198984 /DB_XREF=gi:6479553 /DB_XREF=da09e01.x1 /CLONE=XENOPUS_SOURCE_ID:xlnoc003c01 /TID=Xl.18460.1 /CNT=2 /FEA=EST /TIER=ConsEnd /STK=2 /UG=Xl.18460 /UG_TITLE=ESTs
Xl.7945.2.A1_at	4.31159	4.1723	4.1723	6.46777	6.32801	7.42405	6.43464	4.21873	6.66362	-2.44488	-8.30895	2.38265e-05	0.00022957	3.04569	gb:BF071826 /DB_XREF=gi:10848465 /DB_XREF=db46h06.x1 /CLONE=IMAGE:3301595 /TID=Xl.7945.2 /CNT=2 /FEA=EST /TIER=ConsEnd /STK=1 /UG=Xl.7945 /UG_TITLE=ESTs, Moderately similar to C Chain C, Structure Of Tetragonal Crystals Of Human Erythrocyte Catalase (H.sapiens)
Xl.5779.1.A1_at	4.69522	5.06568	5.06568	7.64009	7.23329	7.66535	7.00138	4.94219	7.38503	-2.44283	-9.99484	5.69488e-06	9.11512e-05	4.54781	gb:BM191911 /DB_XREF=gi:17527874 /DB_XREF=dag38b08.x3 /CLONE=IMAGE:4783455 /TID=Xl.5779.1 /CNT=2 /FEA=EST /TIER=ConsEnd /STK=1 /UG=Xl.5779 /UG_TITLE=ESTs
Xl.4204.3.S1_a_at	4.11956	5.49281	5.49281	6.93303	6.84446	8.1789	7.94836	5.03506	7.47619	-2.44113	-5.25516	0.000641764	0.00213952	-0.456712	gb:BF048907 /DB_XREF=gi:10767410 /DB_XREF=db80h04.y1 /CLONE=IMAGE:3379351 /TID=Xl.4204.3 /CNT=38 /FEA=EST /TIER=Stack /STK=6 /UG=Xl.4204 /UG_TITLE=Xenopus laevis, Similar to hypothetical protein FLJ12666, clone MGC:53321 IMAGE:5570637, mRNA, complete cds
Xl.8421.1.S1_at	5.17333	5.50608	5.50608	7.67619	7.72055	8.08721	7.85299	5.39516	7.83423	-2.43907	-11.6378	1.70152e-06	4.29493e-05	5.79557	gb:BM172638 /DB_XREF=gi:17312201 /DB_XREF=imageqc_3_2001smm438bdff41.x1 /CLONE=IMAGE:4684386 /TID=Xl.8421.1 /CNT=21 /FEA=EST /TIER=ConsEnd /STK=4 /UG=Xl.8421 /UG_TITLE=ESTs, Highly similar to A Chain A, Structure Of The Human PinLC8 DIMER WITH A BOUND PEPTIDE (H.sapiens)
Xl.24808.1.S1_at	6.39585	6.91056	6.91056	9.10384	8.94285	9.42582	9.23745	6.73899	9.17749	-2.4385	-10.629	3.50436e-06	6.65249e-05	5.05197	gb:BF025476 /DB_XREF=gi:10755895 /DB_XREF=dg04c02.x1 /CLONE=IMAGE:3747842 /TID=Xl.24808.1 /CNT=20 /FEA=EST /TIER=Stack /STK=8 /UG=Xl.24808 /UG_TITLE=ESTs
Xl.4101.1.S1_at	5.91661	6.01865	6.01865	8.97702	9.28215	8.31376	7.11324	5.98463	8.42154	-2.43691	-5.15514	0.000728971	0.00235373	-0.592327	gb:BC043853.1 /DB_XREF=gi:27696999 /TID=Xl.4101.1 /CNT=49 /FEA=FLmRNA /TIER=FL+Stack /STK=7 /UG=Xl.4101 /DEF=Xenopus laevis, Similar to squamous cell carcinoma antigen recognised by T cells, clone MGC:53679 IMAGE:4888766, mRNA, complete cds. /PROD=Similar to squamous cell carcinoma antigenrecognised by T cells /FL=gb:BC043853.1
Xl.4715.1.S1_s_at	4.78156	5.42288	5.42288	7.92748	7.7144	7.7081	7.22999	5.2091	7.64499	-2.43589	-9.29495	1.00463e-05	0.000129643	3.95462	gb:BI443245 /DB_XREF=gi:15267952 /DB_XREF=dae56f06.x3 /CLONE=IMAGE:4678043 /TID=Xl.4715.1 /CNT=10 /FEA=mRNA /TIER=ConsEnd /STK=1 /UG=Xl.4715 /UG_TITLE=Xenopus laevis mRNA for BAMBI protein (bambi gene)
Xl.18967.1.A1_at	3.65982	2.51649	2.51649	5.16103	4.51628	5.55217	6.10356	2.8976	5.33326	-2.43566	-5.67536	0.000381515	0.00145571	0.0972956	gb:BJ051689 /DB_XREF=gi:17496059 /DB_XREF=BJ051689 /CLONE=XL036h22 /TID=Xl.18967.1 /CNT=2 /FEA=EST /TIER=ConsEnd /STK=2 /UG=Xl.18967 /UG_TITLE=ESTs, Weakly similar to CGI-86 protein (Homo sapiens) (H.sapiens)
Xl.9454.1.S1_at	5.66032	5.5827	5.5827	8.06604	7.5806	8.56972	7.9529	5.60858	8.04231	-2.43374	-9.43526	8.94034e-06	0.000120093	4.07681	gb:BJ086154 /DB_XREF=gi:17582445 /DB_XREF=BJ086154 /CLONE=XL052d01 /TID=Xl.9454.1 /CNT=24 /FEA=EST /TIER=ConsEnd /STK=4 /UG=Xl.9454 /UG_TITLE=ESTs, Highly similar to VATC_HUMAN Vacuolar ATP synthase subunit C (V-ATPase C subunit) (Vacuolar proton pump C subunit) (H.sapiens)
Xl.26210.1.S1_at	5.61809	5.56575	5.56575	8.02498	7.87813	8.29393	7.86663	5.5832	8.01592	-2.43272	-12.1499	1.2043e-06	3.45783e-05	6.14813	gb:BJ076457 /DB_XREF=gi:17521373 /DB_XREF=BJ076457 /CLONE=XL080m11 /TID=Xl.26210.1 /CNT=18 /FEA=EST /TIER=ConsEnd /STK=4 /UG=Xl.26210 /UG_TITLE=ESTs
Xl.23983.1.A1_at	7.03361	5.43097	5.43097	8.8506	8.26159	8.42626	8.05015	5.96518	8.39715	-2.43197	-5.83562	0.000314852	0.00127551	0.301986	gb:BJ083902 /DB_XREF=gi:17579177 /DB_XREF=BJ083902 /CLONE=XL086i24 /TID=Xl.23983.1 /CNT=11 /FEA=EST /TIER=Stack /STK=7 /UG=Xl.23983 /UG_TITLE=ESTs
XlAffx.1.3.S1_at	5.73195	5.46733	5.46733	9.3197	8.75945	6.52351	7.3311	5.55554	7.98344	-2.4279	-3.95945	0.0037402	0.0087203	-2.32416	gb:BC046703.1 /DB_XREF=gi:28302349 /TID=XlAffx.1.3 /CNT=1 /FEA=FLmRNA /TIER=FL /STK=1 /NOTE=sequence(s) not in UniGene /DEF=Xenopus laevis, Similar to epithelial membrane protein 3, clone MGC:53217 IMAGE:5543313, mRNA, complete cds. /PROD=Similar to epithelial membrane protein 3 /FL=gb:BC046703.1
Xl.4456.1.A1_at	3.60672	5.47275	5.47275	7.36	6.59003	7.72972	7.43016	4.85074	7.27748	-2.42674	-4.94694	0.000954722	0.00288875	-0.879272	gb:BG264227 /DB_XREF=gi:12967279 /DB_XREF=daa36h09.x1 /CLONE=IMAGE:4058369 /TID=Xl.4456.1 /CNT=5 /FEA=EST /TIER=ConsEnd /STK=2 /UG=Xl.4456 /UG_TITLE=ESTs, Weakly similar to mannose-6- phosphate isomerase; Mannosephosphate isomerase (phosphomannose isomerase 1) (Homo sapiens) (H.sapiens)
Xl.7412.1.A1_at	4.08324	4.70621	4.70621	7.20797	7.3262	7.18199	5.98347	4.49856	6.92491	-2.42635	-6.67992	0.000120822	0.000649947	1.32265	gb:BG347345 /DB_XREF=gi:13167692 /DB_XREF=dab96c12.x1 /CLONE=IMAGE:4405270 /TID=Xl.7412.1 /CNT=4 /FEA=EST /TIER=ConsEnd /STK=4 /UG=Xl.7412 /UG_TITLE=ESTs, Moderately similar to serinethreonine-protein kinase (Homo sapiens) (H.sapiens)
Xl.3783.1.S1_a_at	4.67809	4.90241	4.90241	7.35019	6.77177	7.5117	7.3715	4.82764	7.25129	-2.42365	-10.2144	4.79945e-06	8.20369e-05	4.7258	gb:X56039.1 /DB_XREF=gi:64918 /TID=Xl.3783.1 /CNT=1 /FEA=mRNA /TIER=ConsEnd /STK=0 /UG=Xl.3783 /DEF=X.laevis mRNA for nucleolar-localized protein NO38. /PROD=NO38
Xl.15203.1.S1_at	5.91891	5.66281	5.66281	8.55166	8.07028	8.55281	7.50853	5.74817	8.17082	-2.42265	-8.27037	2.46864e-05	0.000235484	3.00824	gb:BJ078727 /DB_XREF=gi:17523643 /DB_XREF=BJ078727 /CLONE=XL066a01 /TID=Xl.15203.1 /CNT=11 /FEA=EST /TIER=ConsEnd /STK=3 /UG=Xl.15203 /UG_TITLE=ESTs, Moderately similar to B Chain B, Three-Dimensional Structure Of Human Electron Transfer Flavoprotein To 2.1 A Resolution (H.sapiens)
Xl.10425.1.S1_at	4.12658	4.69289	4.69289	6.40943	6.15493	7.73038	7.40553	4.50412	6.92507	-2.42095	-5.93467	0.000280088	0.00117273	0.4267	gb:BC046748.1 /DB_XREF=gi:28436828 /TID=Xl.10425.1 /CNT=12 /FEA=FLmRNA /TIER=FL /STK=4 /UG=Xl.10425 /DEF=Xenopus laevis, Similar to hippocampus abundant gene transcript 1, clone MGC:53894 IMAGE:5543365, mRNA, complete cds. /PROD=Similar to hippocampus abundant gene transcript1 /FL=gb:BC046748.1
Xl.8341.1.A1_at	5.26439	6.4152	6.4152	8.44477	9.1495	8.21617	7.99916	6.0316	8.4524	-2.4208	-6.37487	0.000169059	0.000823076	0.964799	gb:BG810983 /DB_XREF=gi:14181951 /DB_XREF=daf33h11.x1 /CLONE=IMAGE:4740357 /TID=Xl.8341.1 /CNT=6 /FEA=EST /TIER=ConsEnd /STK=3 /UG=Xl.8341 /UG_TITLE=ESTs, Moderately similar to SC63_HUMAN Translocation protein SEC63 homolog (H.sapiens)
Xl.24764.1.A1_at	5.05973	5.20823	5.20823	7.65885	7.29701	7.75679	7.60114	5.15873	7.57845	-2.41972	-11.9599	1.36693e-06	3.68526e-05	6.01917	gb:BJ090533 /DB_XREF=gi:17588780 /DB_XREF=BJ090533 /CLONE=XL109d05 /TID=Xl.24764.1 /CNT=24 /FEA=EST /TIER=Stack /STK=9 /UG=Xl.24764 /UG_TITLE=ESTs, Highly similar to S33809 neurofibromin 2 - human (H.sapiens)
Xl.2472.1.S1_at	5.6331	6.20116	6.20116	8.42611	8.6203	8.58824	8.08234	6.01181	8.42925	-2.41744	-9.93738	5.95882e-06	9.40152e-05	4.50061	gb:AF378334.1 /DB_XREF=gi:21956189 /GEN=ARC105 /TID=Xl.2472.1 /CNT=10 /FEA=FLmRNA /TIER=FL /STK=4 /UG=Xl.2472 /DEF=Xenopus laevis ARC105 (ARC105) mRNA, complete cds. /PROD=ARC105 /FL=gb:AF378334.1
Xl.23673.1.S1_at	7.49603	7.53389	7.53389	9.7348	9.67776	9.83928	10.5008	7.52127	9.93815	-2.41688	-9.7159	7.11086e-06	0.000103773	4.31622	gb:BM180296 /DB_XREF=gi:17404367 /DB_XREF=daj88b02.x1 /CLONE=IMAGE:5129810 /TID=Xl.23673.1 /CNT=20 /FEA=EST /TIER=Stack /STK=6 /UG=Xl.23673 /UG_TITLE=ESTs, Highly similar to EF2_HUMAN Elongation factor 2 (EF-2) (H.sapiens)
Xl.7494.1.A1_at	6.04899	5.56531	5.56531	7.91029	7.76857	8.07976	8.81062	5.72654	8.14231	-2.41577	-8.19236	2.65322e-05	0.000246141	2.93203	gb:BI445742 /DB_XREF=gi:15270449 /DB_XREF=dae58d01.x3 /CLONE=IMAGE:4678297 /TID=Xl.7494.1 /CNT=7 /FEA=EST /TIER=ConsEnd /STK=1 /UG=Xl.7494 /UG_TITLE=ESTs, Weakly similar to PTTG_HUMAN Pituitary tumor-transforming gene 1 protein-interacting protein (Pituitary tumor-transforming gene protein binding factor) (PTTG-binding factor) (PBF) (H.sapiens)
Xl.6984.1.S1_at	8.13384	8.04874	8.04874	9.49152	10.2285	10.5519	11.6939	8.07711	10.4915	-2.41437	-5.32199	0.000589853	0.00200844	-0.366904	gb:BC045117.1 /DB_XREF=gi:28175719 /TID=Xl.6984.1 /CNT=54 /FEA=FLmRNA /TIER=FL+Stack /STK=12 /UG=Xl.6984 /DEF=Xenopus laevis, Similar to protein transport protein SEC61 alpha subunit isoform 1, clone MGC:53497 IMAGE:5572471, mRNA, complete cds. /PROD=Similar to protein transport protein SEC61 alphasubunit isoform 1 /FL=gb:BC045117.1
Xl.2650.1.S1_at	5.6331	5.41909	5.41909	8.08682	8.15959	7.96986	7.39655	5.49043	7.90321	-2.41278	-9.95391	5.88155e-06	9.30436e-05	4.51422	gb:BJ056562 /DB_XREF=gi:17469540 /DB_XREF=BJ056562 /CLONE=XL032d23 /TID=Xl.2650.1 /CNT=2 /FEA=EST /TIER=ConsEnd /STK=2 /UG=Xl.2650 /UG_TITLE=ESTs
Xl.4515.1.S2_a_at	6.65033	6.19915	6.19915	9.08162	9.17646	8.82965	7.95888	6.34954	8.76165	-2.41211	-7.45	5.42232e-05	0.00039365	2.1747	gb:BM261737 /DB_XREF=gi:17924777 /DB_XREF=dai48g07.x1 /CLONE=IMAGE:4964941 /TID=Xl.4515.1 /CNT=307 /FEA=FLmRNA /TIER=ConsEnd /STK=5 /UG=Xl.4515 /UG_TITLE=Xenopus laevis Xcirp mRNA for cold-inducible RNA binding protein, complete cds /FL=gb:BC041204.1 gb:AF278702.1
Xl.5336.1.A1_at	5.55063	5.49298	5.49298	7.9152	7.77231	8.05244	7.9531	5.5122	7.92326	-2.41106	-12.9389	7.24898e-07	2.45589e-05	6.66174	gb:BE575420 /DB_XREF=gi:9825219 /DB_XREF=dc55b06.x1 /CLONE=IMAGE:3400979 /TID=Xl.5336.1 /CNT=1 /FEA=EST /TIER=ConsEnd /STK=1 /UG=Xl.5336 /UG_TITLE=EST, Weakly similar to syntaxin 6 (Homo sapiens) (H.sapiens)
Xl.4045.1.A1_at	5.48315	3.04127	3.04127	6.70317	5.34091	6.64789	6.37175	3.85523	6.26593	-2.4107	-3.86541	0.00429104	0.00970895	-2.46853	gb:BF024797 /DB_XREF=gi:10755216 /DB_XREF=dd11e11.y1 /CLONE=IMAGE:3420140 /TID=Xl.4045.1 /CNT=2 /FEA=EST /TIER=ConsEnd /STK=0 /UG=Xl.4045 /UG_TITLE=ESTs
Xl.6143.1.S2_at	4.9008	5.34518	5.34518	7.58962	7.41669	7.72345	7.69994	5.19706	7.60743	-2.41037	-11.3739	2.04414e-06	4.7492e-05	5.60756	gb:BJ053486 /DB_XREF=gi:17500366 /DB_XREF=BJ053486 /CLONE=XL038p19 /TID=Xl.6143.1 /CNT=80 /FEA=FLmRNA /TIER=Stack /STK=13 /UG=Xl.6143 /UG_TITLE=Xenopus laevis small GTPase Ran binding protein 1 mRNA, complete cds /FL=gb:AF015303.1
Xl.10501.1.A1_at	4.955	5.87711	5.87711	8.87592	7.80523	7.12841	8.10742	5.56974	7.97925	-2.40951	-5.68768	0.000375877	0.00144144	0.113163	gb:BG812118 /DB_XREF=gi:14183098 /DB_XREF=dab99e09.x1 /CLONE=IMAGE:4405721 /TID=Xl.10501.1 /CNT=4 /FEA=EST /TIER=ConsEnd /STK=2 /UG=Xl.10501 /UG_TITLE=ESTs
Xl.25500.1.A1_at	6.51173	6.76508	6.76508	9.46189	9.34347	8.77642	8.77709	6.68063	9.08972	-2.40909	-9.65682	7.45846e-06	0.000107281	4.26637	gb:BJ057187 /DB_XREF=gi:17469959 /DB_XREF=BJ057187 /CLONE=XL034e18 /TID=Xl.25500.1 /CNT=24 /FEA=EST /TIER=Stack /STK=8 /UG=Xl.25500 /UG_TITLE=ESTs, Weakly similar to VRK3 for vaccinia related kinase 3 (Homo sapiens) (H.sapiens)
Xl.9905.1.A1_at	3.65087	5.37802	5.37802	7.52104	6.81803	7.63329	6.86501	4.80231	7.20934	-2.40704	-5.29357	0.000611349	0.0020651	-0.405018	gb:BG020080 /DB_XREF=gi:12476159 /DB_XREF=dc47c12.x1 /CLONE=IMAGE:3400318 /TID=Xl.9905.1 /CNT=2 /FEA=EST /TIER=ConsEnd /STK=1 /UG=Xl.9905 /UG_TITLE=ESTs, Weakly similar to myeloidlymphoid or mixed-lineage leukemia 2; ALL1-related gene (Homo sapiens) (H.sapiens)
Xl.16608.1.A1_at	3.88243	3.30966	3.30966	5.86416	5.35142	7.2183	5.1623	3.50059	5.89905	-2.39846	-5.05541	0.000828898	0.00259256	-0.729	gb:CA988281 /DB_XREF=gi:27520956 /DB_XREF=AGENCOURT_11300467 /CLONE=IMAGE:6865376 /TID=Xl.16608.1 /CNT=5 /FEA=EST /TIER=ConsEnd /STK=1 /UG=Xl.16608 /UG_TITLE=ESTs
Xl.3027.1.S1_at	6.84042	5.34518	5.34518	8.68796	8.57731	7.67591	8.01725	5.84359	8.23961	-2.39601	-5.62218	0.000406926	0.00152233	0.0285781	gb:BC045094.1 /DB_XREF=gi:27924245 /TID=Xl.3027.1 /CNT=9 /FEA=FLmRNA /TIER=FL /STK=3 /UG=Xl.3027 /DEF=Xenopus laevis, Similar to 26S proteasome-associated pad1 homolog, clone MGC:53911 IMAGE:5569802, mRNA, complete cds. /PROD=Similar to 26S proteasome-associated pad1homolog /FL=gb:BC045094.1
Xl.6956.1.S1_at	4.75703	4.84554	4.84554	8.07999	7.86545	6.63917	6.26058	4.81604	7.2113	-2.39526	-5.37479	0.000552071	0.00191303	-0.296408	gb:BF611080 /DB_XREF=gi:11780364 /DB_XREF=dd87e07.x1 /CLONE=IMAGE:3431149 /TID=Xl.6956.1 /CNT=9 /FEA=EST /TIER=ConsEnd /STK=3 /UG=Xl.6956 /UG_TITLE=ESTs, Moderately similar to calcitonin gene-related peptide-receptor component protein (Homo sapiens) (H.sapiens)
Xl.4416.1.A1_at	5.33141	6.29223	6.29223	8.24721	7.93365	8.68081	8.59744	5.97196	8.36478	-2.39282	-7.61961	4.58362e-05	0.000351656	2.35303	gb:BG554662 /DB_XREF=gi:13566442 /DB_XREF=de98a09.x3 /CLONE=IMAGE:3549593 /TID=Xl.4416.1 /CNT=9 /FEA=EST /TIER=ConsEnd /STK=1 /UG=Xl.4416 /UG_TITLE=ESTs, Moderately similar to S18207 adducin alpha chain, splice form 1 - human (H.sapiens)
Xl.18499.1.S1_at	5.86674	5.47275	5.47275	8.85195	6.81262	7.77756	8.54273	5.60408	7.99622	-2.39214	-5.22102	0.000670182	0.00221052	-0.502836	gb:BF612844 /DB_XREF=gi:11783883 /DB_XREF=dd77d11.x2 /CLONE=IMAGE:3430317 /TID=Xl.18499.1 /CNT=6 /FEA=EST /TIER=ConsEnd /STK=1 /UG=Xl.18499 /UG_TITLE=ESTs, Moderately similar to nuclear DNA-binding protein (Homo sapiens) (H.sapiens)
Xl.14406.1.A1_at	4.70589	4.24607	4.24607	7.27446	6.85518	7.02595	5.99201	4.39934	6.7869	-2.38756	-7.34258	6.04033e-05	0.000421465	2.06008	gb:BJ056269 /DB_XREF=gi:17468307 /DB_XREF=BJ056269 /CLONE=XL035e16 /TID=Xl.14406.1 /CNT=3 /FEA=EST /TIER=ConsEnd /STK=1 /UG=Xl.14406 /UG_TITLE=ESTs
Xl.2459.1.S1_at	4.30035	3.86198	3.86198	6.58856	6.02586	6.46556	6.50187	4.00811	6.39546	-2.38736	-10.2994	4.49576e-06	7.8233e-05	4.79371	gb:BC043978.1 /DB_XREF=gi:27694841 /TID=Xl.2459.1 /CNT=12 /FEA=FLmRNA /TIER=FL /STK=3 /UG=Xl.2459 /DEF=Xenopus laevis, Similar to cDNA sequence BC012312, clone MGC:53395 IMAGE:5571543, mRNA, complete cds. /PROD=Similar to cDNA sequence BC012312 /FL=gb:BC043978.1
Xl.10289.1.A1_at	4.44875	5.00048	5.00048	7.45844	7.64319	7.3834	6.32672	4.81657	7.20294	-2.38637	-6.92245	9.32185e-05	0.000549654	1.59875	gb:BF232362 /DB_XREF=gi:11174929 /DB_XREF=de20a12.x1 /CLONE=IMAGE:3438263 /TID=Xl.10289.1 /CNT=1 /FEA=EST /TIER=ConsEnd /STK=1 /UG=Xl.10289 /UG_TITLE=EST
Xl.14987.1.A1_at	5.8055	6.68287	6.68287	9.00119	9.72414	8.61332	7.76738	6.39041	8.77651	-2.38609	-5.27455	0.000626215	0.00209682	-0.430599	gb:BJ091447 /DB_XREF=gi:17590101 /DB_XREF=BJ091447 /CLONE=XL097c22 /TID=Xl.14987.1 /CNT=3 /FEA=EST /TIER=ConsEnd /STK=1 /UG=Xl.14987 /UG_TITLE=ESTs, Highly similar to I38138 protein-serine kinase (EC 2.7.1.-) PSK-H1 - human (fragment) (H.sapiens)
Xl.2622.2.S1_at	6.59473	5.7562	5.7562	8.21664	7.70978	8.56614	9.18946	6.03571	8.4205	-2.38479	-6.28339	0.000187386	0.000890412	0.855116	gb:AW199314 /DB_XREF=gi:6479883 /DB_XREF=da19d09.x1 /CLONE=XENOPUS_SOURCE_ID:xlnga002j18 /TID=Xl.2622.2 /CNT=139 /FEA=EST /TIER=Stack /STK=36 /UG=Xl.2622 /UG_TITLE=X.laevis cytokeratin type II mRNA, complete cds
Xl.3816.1.A1_at	6.59473	5.29568	5.29568	7.73331	7.95831	8.60291	8.15767	5.7287	8.11305	-2.38436	-6.42664	0.000159565	0.000786863	1.02638	gb:BJ076063 /DB_XREF=gi:17520979 /DB_XREF=BJ076063 /CLONE=XL104i12 /TID=Xl.3816.1 /CNT=7 /FEA=EST /TIER=ConsEnd /STK=4 /UG=Xl.3816 /UG_TITLE=ESTs, Moderately similar to hypothetical protein MGC12103 (Homo sapiens) (H.sapiens)
Xl.1684.1.A1_at	5.1244	4.36832	4.36832	7.47333	6.82202	6.79879	6.92331	4.62035	7.00436	-2.38402	-8.48777	2.02501e-05	0.000208772	3.21738	gb:BJ085601 /DB_XREF=gi:17581654 /DB_XREF=BJ085601 /CLONE=XL106h05 /TID=Xl.1684.1 /CNT=14 /FEA=EST /TIER=Stack /STK=11 /UG=Xl.1684 /UG_TITLE=ESTs, Moderately similar to TATA box-binding protein-associated factor 2F; transcription initiation factor TFIID, 55 kDa subunit; transcription factor IID subunit TAFII55; TBP-associated factor F; TATA box binding protein (TBP)-associated factor, RNA polymer…
Xl.24698.1.A1_at	5.73996	3.11827	3.11827	6.1251	6.2182	7.10476	6.05488	3.99217	6.37574	-2.38357	-3.78022	0.004865	0.0107637	-2.60022	gb:CB564427 /DB_XREF=gi:29483957 /DB_XREF=AGENCOURT_13320604 /CLONE=IMAGE:6874217 /TID=Xl.24698.1 /CNT=2 /FEA=EST /TIER=ConsEnd /STK=1 /UG=Xl.24698 /UG_TITLE=ESTs
Xl.24724.1.S1_at	8.13366	8.27988	8.27988	10.7895	10.4151	10.8161	10.4292	8.23114	10.6124	-2.3813	-11.5121	1.85595e-06	4.51602e-05	5.70661	gb:BJ098324 /DB_XREF=gi:17600087 /DB_XREF=BJ098324 /CLONE=XL146b13 /TID=Xl.24724.1 /CNT=11 /FEA=EST /TIER=ConsEnd /STK=3 /UG=Xl.24724 /UG_TITLE=ESTs, Weakly similar to hypothetical protein MGC4825 (Homo sapiens) (H.sapiens)
Xl.25746.1.A1_at	7.54453	6.60578	6.60578	9.38714	9.14472	9.29645	9.36746	6.9187	9.29894	-2.38024	-8.70309	1.67096e-05	0.000182946	3.41997	gb:AW782770 /DB_XREF=gi:7797376 /DB_XREF=db23c03.x1 /CLONE=XENOPUS_SOURCE_ID: /TID=Xl.25746.1 /CNT=5 /FEA=EST /TIER=ConsEnd /STK=2 /UG=Xl.25746 /UG_TITLE=ESTs, Moderately similar to hypothetical protein FLJ20142; likely ortholog of mouse ganglioside-induced differentiation-associated-protein 2 (Homo sapiens) (H.sapiens)
Xl.11684.1.S1_at	4.10099	6.76861	6.76861	8.24809	7.8777	9.02442	7.8777	5.8794	8.25698	-2.37758	-3.67125	0.00572061	0.0123708	-2.76984	gb:BC044263.1 /DB_XREF=gi:28277285 /TID=Xl.11684.1 /CNT=11 /FEA=FLmRNA /TIER=FL /STK=2 /UG=Xl.11684 /DEF=Xenopus laevis, Similar to autoantigen, clone MGC:53087 IMAGE:5542224, mRNA, complete cds. /PROD=Similar to autoantigen /FL=gb:BC044263.1
[truncated: 5,890 more rows]
