# Supplementary material for: Sterility and Gene Expression in Hybrid Males of Xenopus laevis and X. muelleri
Source: PLoS One. 2007 Aug 22;2(8):e781. doi: 10.1371/journal.pone.0000781 (PMC1940320; doi:10.1371/journal.pone.0000781)
Supplement: Table S8 — Top 20 transcripts with the highest sequence conservation between Affymetrix probesets and Xenopus tropicalis genome. Probe ID is the Affymetrix reference number for a particular probeset. Columns B–C are mean differences between RMA-normalized expression values of Xenopus laevis and hybrids (B) and Xenopus muelleri and hybrids (C). Columns D and E are absolute values from columns B and C, respectively. Column F is mean % sequence identity of sequences between Affymetrix probesets and Xenopus tropicalis genome generated by BLAST. Column G is average alignment length from BLAST. Column H is average mismatch number of the alignments from F and G. Column I is mean E-value generated by BLAST. J column contains Affymetrix descriptions of transcripts. (0.02 MB XLS) [file pone.0000781.s008.xls]

## Sheet: Sheet1
ProbeID	L-H	M-H	absL-H	absM-H	Avg.%identity	Avg.alignment length	Avg.mismatches	Avg.e-value	Description
Xl.12161.1.A1_s_at	0.13562	0.817765	0.13562	0.817765	100	25	0	1e-05	gb:BG485936 /DB_XREF=gi:13433513 /DB_XREF=dab29a07.x1 /CLONE=IMAGE:4175533 /TID=Xl.12161.1 /CNT=2 /FEA=EST /TIER=ConsEnd /STK=1 /UG=Xl.12161 /UG_TITLE=ESTs
Xl.11469.2.A1_a_at	-0.901396	0.671097	0.901396	0.671097	100	24.875	0	2.1875e-05	gb:BQ400620 /DB_XREF=gi:21088307 /DB_XREF=NISC_mp10d08.x1 /CLONE=IMAGE:4968999 /TID=Xl.11469.2 /CNT=8 /FEA=EST /TIER=ConsEnd /STK=0 /UG=Xl.11469 /UG_TITLE=ESTs, Highly similar to ACTZ_HUMAN Alpha-centractin (Centractin) (Centrosome-associated actin homolog) (Actin-RPV) (ARP1) (H.sapiens)
Xl.11494.1.A1_a_at	0.305307	-0.172488	0.305307	0.172488	99.5	24.5	0.125	0.000609375	gb:BF072188 /DB_XREF=gi:10848827 /DB_XREF=db52h06.x1 /CLONE=IMAGE:3302171 /TID=Xl.11494.1 /CNT=4 /FEA=EST /TIER=ConsEnd /STK=2 /UG=Xl.11494 /UG_TITLE=ESTs
Xl.1130.1.S1_s_at	-1.68779	0.824357	1.68779	0.824357	99.4894	24.9375	0.125	0.00082125	gb:AF179300.1 /DB_XREF=gi:5815454 /GEN=Pax-2 /TID=Xl.1130.1 /CNT=1 /FEA=FLmRNA /TIER=FL /STK=1 /UG=Xl.1130 /DEF=Xenopus laevis Pax-2 protein (Pax-2) mRNA, complete cds. /PROD=Pax-2 protein /FL=gb:AF179300.1
Xl.12121.1.S1_at	-0.417269	0.511103	0.417269	0.511103	99.5	24.375	0.125	0.00105687	gb:CD327626 /DB_XREF=gi:31091957 /DB_XREF=AGENCOURT_14150958 /CLONE=IMAGE:6951264 /TID=Xl.12121.1 /CNT=86 /FEA=FLmRNA /TIER=Stack /STK=22 /UG=Xl.12121 /UG_TITLE=Xenopus laevis, Similar to hypothetical protein LOC215449, clone MGC:53007 IMAGE:5536997, mRNA, complete cds /FL=gb:BC044988.1
Xl.1140.1.S1_s_at	-0.0143224	-0.00344084	0.0143224	0.00344084	98.9894	24.9375	0.25	0.001195	gb:X63425.1 /DB_XREF=gi:64583 /TID=Xl.1140.1 /CNT=4 /FEA=mRNA /TIER=ConsEnd /STK=0 /UG=Xl.1140 /DEF=X.laevis mRNA for bone morphogenetic protein 2 (Xbr22). /PROD=bone morphogenetic protein 2
Xl.1036.2.S1_a_at	-1.05976	1.47653	1.05976	1.47653	100	24.25	0	0.00264562	gb:U17599.1 /DB_XREF=gi:608542 /GEN=elrD /TID=Xl.1036.2 /CNT=1 /FEA=FLmRNA /TIER=FL /STK=1 /UG=Xl.1036 /DEF=Xenopus laevis ribonucleoprotein (elrD) mRNA, complete cds. /PROD=ribonucleoprotein /FL=gb:U17599.1
Xl.1286.1.S1_s_at	0.0352909	0.73712	0.0352909	0.73712	99.75	24.4375	0.0625	0.00267062	gb:BC044962.1 /DB_XREF=gi:27924401 /TID=Xl.1286.1 /CNT=41 /FEA=FLmRNA /TIER=FL /STK=4 /UG=Xl.1286 /DEF=Xenopus laevis, Similar to collagen, type II, alpha 1 (primary osteoarthritis, spondyloepiphyseal dysplasia, congenital), clone MGC:52599 IMAGE:4930289, mRNA, complete cds. /PROD=Similar to collagen, type II, alpha 1 (primaryosteoarthritis, spondyloepiphyseal dysplasia, congenital) /FL=gb:BC0449…
Xl.12.1.S1_s_at	-0.233189	-0.527046	0.233189	0.527046	99.2281	24.0625	0.1875	0.003095	gb:BG018221 /DB_XREF=gi:12473223 /DB_XREF=de66h03.x1 /CLONE=IMAGE:3516893 /TID=Xl.12.1 /CNT=12 /FEA=mRNA /TIER=ConsEnd /STK=0 /UG=Xl.12 /UG_TITLE=X.laevis mRNA for nuclear protein SDK2
Xl.12211.1.A1_at	-0.0905647	0.956815	0.0905647	0.956815	97.9894	23.5	0.5	0.00944188	gb:BJ082991 /DB_XREF=gi:17577868 /DB_XREF=BJ082991 /CLONE=XL083l22 /TID=Xl.12211.1 /CNT=2 /FEA=EST /TIER=ConsEnd /STK=1 /UG=Xl.12211 /UG_TITLE=ESTs, Weakly similar to paired mesoderm homeobox 2b; PHOX2B homeodomain protein; neuroblastoma paired-type homeobox protein (Homo sapiens) (H.sapiens)
Xl.10511.1.A1_a_at	-0.59749	0.800081	0.59749	0.800081	98.705	24.125	0.3125	0.0114319	gb:BJ085613 /DB_XREF=gi:17581671 /DB_XREF=BJ085613 /CLONE=XL106h18 /TID=Xl.10511.1 /CNT=5 /FEA=EST /TIER=ConsEnd /STK=3 /UG=Xl.10511 /UG_TITLE=ESTs
Xl.1165.1.S1_s_at	-0.324145	1.16696	0.324145	1.16696	97.9437	23.75	0.5	0.014165	gb:X72902.1 /DB_XREF=gi:288692 /TID=Xl.1165.1 /CNT=1 /FEA=mRNA /TIER=ConsEnd /STK=0 /UG=Xl.1165 /UG_TITLE=X.laevis mRNA for dopamine receptor D2 /DEF=X.laevis mRNA for dopamine receptor D2.
Xl.1133.1.S1_at	-0.738117	0.624294	0.738117	0.624294	99	23.0625	0.25	0.0160431	gb:BC042240.1 /DB_XREF=gi:27503173 /TID=Xl.1133.1 /CNT=13 /FEA=FLmRNA /TIER=FL /STK=2 /UG=Xl.1133 /DEF=Xenopus laevis, clone MGC:52560 IMAGE:5571286, mRNA, complete cds. /PROD=Unknown (protein for MGC:52560) /FL=gb:BC042240.1
Xl.13226.1.A1_at	-0.445875	2.19229	0.445875	2.19229	99	23.25	0.25	0.0181044	gb:BJ056194 /DB_XREF=gi:17423705 /DB_XREF=BJ056194 /CLONE=XL035a24 /TID=Xl.13226.1 /CNT=2 /FEA=EST /TIER=ConsEnd /STK=1 /UG=Xl.13226 /UG_TITLE=ESTs, Weakly similar to CGI-41 protein (Homo sapiens) (H.sapiens)
Xl.10032.1.A1_at	0.314331	-4.27563	0.314331	4.27563	97.2394	23.125	0.6875	0.024375	gb:BG016798 /DB_XREF=gi:12470398 /DB_XREF=df65f05.x1 /CLONE=IMAGE:3744153 /TID=Xl.10032.1 /CNT=3 /FEA=EST /TIER=ConsEnd /STK=2 /UG=Xl.10032 /UG_TITLE=ESTs, Moderately similar to P2CB_HUMAN Protein phosphatase 2C beta isoform (PP2C-beta) (H.sapiens)
Xl.10225.1.A1_at	-1.80852	1.11604	1.80852	1.11604	98.9681	23.125	0.25	0.0251419	gb:BI446333 /DB_XREF=gi:15271040 /DB_XREF=dai87a09.x1 /CLONE=IMAGE:5047216 /TID=Xl.10225.1 /CNT=3 /FEA=EST /TIER=ConsEnd /STK=2 /UG=Xl.10225 /UG_TITLE=ESTs
Xl.12594.1.A1_at	-0.250718	0.366009	0.250718	0.366009	99.2375	22.875	0.125	0.0377294	gb:BJ084988 /DB_XREF=gi:17580786 /DB_XREF=BJ084988 /CLONE=XL102d24 /TID=Xl.12594.1 /CNT=3 /FEA=EST /TIER=ConsEnd /STK=2 /UG=Xl.12594 /UG_TITLE=ESTs
Xl.12856.1.S1_at	-0.178479	-1.13554	0.178479	1.13554	99.25	24.375	0.1875	0.0393319	gb:AW644637 /DB_XREF=gi:7402031 /DB_XREF=cm43d09.w1 /CLONE=PBX0142D09 /TID=Xl.12856.1 /CNT=4 /FEA=EST /TIER=ConsEnd /STK=1 /UG=Xl.12856 /UG_TITLE=ESTs, Highly similar to T9S3_HUMAN Transmembrane 9 superfamily protein member 3 precursor (SM-11044 binding protein) (EP70-P-iso) (H.sapiens)
Xl.12071.1.S1_s_at	0.231686	0.774558	0.231686	0.774558	98.75	23.75	0.3125	0.0399663	gb:AF390895.1 /DB_XREF=gi:18033969 /GEN=SNT /TID=Xl.12071.1 /CNT=20 /FEA=FLmRNA /TIER=FL /STK=1 /UG=Xl.12071 /DEF=Xenopus laevis suc1-associated neurotrophic factor target XSNT (SNT) mRNA, complete cds. /PROD=suc1-associated neurotrophic factor target XSNT /FL=gb:AF390895.1
Xl.1099.2.S1_a_at	-0.285129	1.646	0.285129	1.646	98.7394	24.375	0.3125	0.0401331	gb:AB045238.1 /DB_XREF=gi:8885505 /GEN=XRPTPb /TID=Xl.1099.2 /CNT=1 /FEA=FLmRNA /TIER=FL /STK=1 /UG=Xl.1099 /DEF=Xenopus laevis XRPTPb mRNA for receptor-type protein tyrosine phosphatase beta.2 secretory variant, complete cds. /PROD=receptor-type protein tyrosine phosphatasebeta.2 secretory variant /FL=gb:AB045238.1
